# Supplementary material for: Investigation of the potential mechanism of the Shugan Xiaozhi decoction for the treatment of nonalcoholic fatty liver disease based on network pharmacology, molecular docking and molecular dynamics simulation
Source: PeerJ journal article supplement (doi:10.7717/peerj.14171), 2022-11-10
Supplement: Supplementary_file.GO(CC)-raw_data.docx [file Supplementary_file.GO%28CC%29-raw_data.docx]

| Category | Term | Count | % | PValue |
| --- | --- | --- | --- | --- |
| GOTERM_CC_DIRECT | GO:0005615~extracellular space | 27 | 35.06494 | 1.27E-11 |
| GOTERM_CC_DIRECT | GO:0070062~extracellular exosome | 29 | 37.66234 | 4.01E-06 |
| GOTERM_CC_DIRECT | GO:0009986~cell surface | 12 | 15.58442 | 1.45E-05 |
| GOTERM_CC_DIRECT | GO:0005576~extracellular region | 19 | 24.67532 | 8.49E-05 |
| GOTERM_CC_DIRECT | GO:0005739~mitochondrion | 17 | 22.07792 | 9.87E-05 |
| GOTERM_CC_DIRECT | GO:0031012~extracellular matrix | 8 | 10.38961 | 2.33E-04 |
| GOTERM_CC_DIRECT | GO:0005829~cytosol | 28 | 36.36364 | 2.45E-04 |
| GOTERM_CC_DIRECT | GO:0005641~nuclear envelope lumen | 3 | 3.896104 | 4.73E-04 |
| GOTERM_CC_DIRECT | GO:0048471~perinuclear region of cytoplasm | 10 | 12.98701 | 0.001089 |
| GOTERM_CC_DIRECT | GO:0031093~platelet alpha granule lumen | 4 | 5.194805 | 0.001565 |
| GOTERM_CC_DIRECT | GO:0009897~external side of plasma membrane | 6 | 7.792208 | 0.001962 |
| GOTERM_CC_DIRECT | GO:0016222~procollagen-proline 4-dioxygenase complex | 2 | 2.597403 | 0.008323 |
| GOTERM_CC_DIRECT | GO:0005788~endoplasmic reticulum lumen | 5 | 6.493506 | 0.008493 |
| GOTERM_CC_DIRECT | GO:0005737~cytoplasm | 32 | 41.55844 | 0.015313 |
| GOTERM_CC_DIRECT | GO:0016020~membrane | 17 | 22.07792 | 0.017892 |
| GOTERM_CC_DIRECT | GO:0033256~I-kappaB/NF-kappaB complex | 2 | 2.597403 | 0.020681 |
| GOTERM_CC_DIRECT | GO:0005783~endoplasmic reticulum | 9 | 11.68831 | 0.021757 |
| GOTERM_CC_DIRECT | GO:0005925~focal adhesion | 6 | 7.792208 | 0.023661 |
| GOTERM_CC_DIRECT | GO:0005578~proteinaceous extracellular matrix | 5 | 6.493506 | 0.025714 |
| GOTERM_CC_DIRECT | GO:0046581~intercellular canaliculus | 2 | 2.597403 | 0.028834 |
| GOTERM_CC_DIRECT | GO:0005793~endoplasmic reticulum-Golgi intermediate compartment | 3 | 3.896104 | 0.032751 |
| GOTERM_CC_DIRECT | GO:0034663~endoplasmic reticulum chaperone complex | 2 | 2.597403 | 0.044941 |
| GOTERM_CC_DIRECT | GO:0000790~nuclear chromatin | 4 | 5.194805 | 0.046841 |
| GOTERM_CC_DIRECT | GO:0005759~mitochondrial matrix | 5 | 6.493506 | 0.047747 |
| GOTERM_CC_DIRECT | GO:0043220~Schmidt-Lanterman incisure | 2 | 2.597403 | 0.048926 |
