# Supplementary material for: Investigation of the potential mechanism of the Shugan Xiaozhi decoction for the treatment of nonalcoholic fatty liver disease based on network pharmacology, molecular docking and molecular dynamics simulation
Source: PeerJ journal article supplement (doi:10.7717/peerj.14171), 2022-11-10
Supplement: Supplementary_file.GO(MF)-raw_data.docx [file Supplementary_file.GO%28MF%29-raw_data.docx]

| Category | Term | Count | % | PValue |
| --- | --- | --- | --- | --- |
| GOTERM_MF_DIRECT | GO:0019899~enzyme binding | 15 | 19.48052 | 2.35E-10 |
| GOTERM_MF_DIRECT | GO:0031995~insulin-like growth factor II binding | 5 | 6.493506 | 2.62E-08 |
| GOTERM_MF_DIRECT | GO:0009055~electron carrier activity | 7 | 9.090909 | 3.14E-06 |
| GOTERM_MF_DIRECT | GO:0016491~oxidoreductase activity | 9 | 11.68831 | 3.19E-06 |
| GOTERM_MF_DIRECT | GO:0031994~insulin-like growth factor I binding | 4 | 5.194805 | 1.87E-05 |
| GOTERM_MF_DIRECT | GO:0005102~receptor binding | 10 | 12.98701 | 2.87E-05 |
| GOTERM_MF_DIRECT | GO:0046982~protein heterodimerization activity | 11 | 14.28571 | 4.28E-05 |
| GOTERM_MF_DIRECT | GO:0005506~iron ion binding | 7 | 9.090909 | 6.51E-05 |
| GOTERM_MF_DIRECT | GO:0043208~glycosphingolipid binding | 3 | 3.896104 | 1.19E-04 |
| GOTERM_MF_DIRECT | GO:0005515~protein binding | 56 | 72.72727 | 2.31E-04 |
| GOTERM_MF_DIRECT | GO:0019904~protein domain specific binding | 7 | 9.090909 | 3.47E-04 |
| GOTERM_MF_DIRECT | GO:0042802~identical protein binding | 12 | 15.58442 | 5.02E-04 |
| GOTERM_MF_DIRECT | GO:0042803~protein homodimerization activity | 11 | 14.28571 | 0.001554 |
| GOTERM_MF_DIRECT | GO:0008134~transcription factor binding | 7 | 9.090909 | 0.001755 |
| GOTERM_MF_DIRECT | GO:0016702~oxidoreductase activity, acting on single donors with incorporation of molecular oxygen, incorporation of two atoms of oxygen | 3 | 3.896104 | 0.001758 |
| GOTERM_MF_DIRECT | GO:0003707~steroid hormone receptor activity | 4 | 5.194805 | 0.002048 |
| GOTERM_MF_DIRECT | GO:0050839~cell adhesion molecule binding | 4 | 5.194805 | 0.002741 |
| GOTERM_MF_DIRECT | GO:0050660~flavin adenine dinucleotide binding | 4 | 5.194805 | 0.003 |
| GOTERM_MF_DIRECT | GO:0000980~RNA polymerase II distal enhancer sequence-specific DNA binding | 4 | 5.194805 | 0.003135 |
| GOTERM_MF_DIRECT | GO:0001530~lipopolysaccharide binding | 3 | 3.896104 | 0.004359 |
| GOTERM_MF_DIRECT | GO:0001205~transcriptional activator activity, RNA polymerase II distal enhancer sequence-specific binding | 3 | 3.896104 | 0.005612 |
| GOTERM_MF_DIRECT | GO:0004252~serine-type endopeptidase activity | 6 | 7.792208 | 0.005846 |
| GOTERM_MF_DIRECT | GO:0008201~heparin binding | 5 | 6.493506 | 0.005875 |
| GOTERM_MF_DIRECT | GO:0008395~steroid hydroxylase activity | 3 | 3.896104 | 0.006062 |
| GOTERM_MF_DIRECT | GO:0042056~chemoattractant activity | 3 | 3.896104 | 0.006528 |
| GOTERM_MF_DIRECT | GO:0070330~aromatase activity | 3 | 3.896104 | 0.006528 |
| GOTERM_MF_DIRECT | GO:0019901~protein kinase binding | 7 | 9.090909 | 0.006924 |
| GOTERM_MF_DIRECT | GO:0031625~ubiquitin protein ligase binding | 6 | 7.792208 | 0.009495 |
| GOTERM_MF_DIRECT | GO:0030544~Hsp70 protein binding | 3 | 3.896104 | 0.00965 |
| GOTERM_MF_DIRECT | GO:0002020~protease binding | 4 | 5.194805 | 0.010658 |
| GOTERM_MF_DIRECT | GO:0042826~histone deacetylase binding | 4 | 5.194805 | 0.010946 |
| GOTERM_MF_DIRECT | GO:0030246~carbohydrate binding | 5 | 6.493506 | 0.011807 |
| GOTERM_MF_DIRECT | GO:0047374~methylumbelliferyl-acetate deacetylase activity | 2 | 2.597403 | 0.013446 |
| GOTERM_MF_DIRECT | GO:0004656~procollagen-proline 4-dioxygenase activity | 2 | 2.597403 | 0.017889 |
| GOTERM_MF_DIRECT | GO:0019825~oxygen binding | 3 | 3.896104 | 0.018973 |
| GOTERM_MF_DIRECT | GO:0001077~transcriptional activator activity, RNA polymerase II core promoter proximal region sequence-specific binding | 5 | 6.493506 | 0.021828 |
| GOTERM_MF_DIRECT | GO:0020037~heme binding | 4 | 5.194805 | 0.023911 |
| GOTERM_MF_DIRECT | GO:0008131~primary amine oxidase activity | 2 | 2.597403 | 0.026714 |
| GOTERM_MF_DIRECT | GO:0004497~monooxygenase activity | 3 | 3.896104 | 0.028108 |
| GOTERM_MF_DIRECT | GO:0001948~glycoprotein binding | 3 | 3.896104 | 0.034665 |
| GOTERM_MF_DIRECT | GO:0003705~transcription factor activity, RNA polymerase II distal enhancer sequence-specific binding | 3 | 3.896104 | 0.035646 |
| GOTERM_MF_DIRECT | GO:0008083~growth factor activity | 4 | 5.194805 | 0.036656 |
| GOTERM_MF_DIRECT | GO:0042975~peroxisome proliferator activated receptor binding | 2 | 2.597403 | 0.044131 |
| GOTERM_MF_DIRECT | GO:0042805~actinin binding | 2 | 2.597403 | 0.044131 |
| GOTERM_MF_DIRECT | GO:0005125~cytokine activity | 4 | 5.194805 | 0.045044 |
