# Supplementary material for: Investigation of the potential mechanism of the Shugan Xiaozhi decoction for the treatment of nonalcoholic fatty liver disease based on network pharmacology, molecular docking and molecular dynamics simulation
Source: PeerJ journal article supplement (doi:10.7717/peerj.14171), 2022-11-10
Supplement: Supplementary_file.KEGG-raw_data.docx [file Supplementary_file.KEGG-raw_data.docx]

| Term | Count | % | PValue | Genes |
| --- | --- | --- | --- | --- |
| hsa04931: Insulin resistance | 8 | 10.38961 | 7.75E-05 | RPS6KA3, PTPN1, IL6, CREB1, PRKCE, PTPN11, RELA, NFKB1 |
| hsa04066: HIF-1 signaling pathway | 7 | 9.090909 | 3.17E-04 | IL6, SERPINE1, PRKCA, HIF1A, RELA, NFKB1, VEGFA |
| hsa00380: Tryptophan metabolism | 5 | 6.493506 | 5.77E-04 | MAOB, ALDH2, ALDH1B1, MAOA, CYP1A1 |
| hsa04726: Serotonergic synapse | 7 | 9.090909 | 6.91E-04 | APP, CYP2C8, MAOB, MAOA, ALOX5, PRKCA, ALOX12 |
| hsa00340: Histidine metabolism | 4 | 5.194805 | 0.001191 | MAOB, ALDH2, ALDH1B1, MAOA |
| hsa05030: Cocaine addiction | 5 | 6.493506 | 0.001253 | CREB1, MAOB, MAOA, RELA, NFKB1 |
| hsa05200: Pathways in cancer | 12 | 15.58442 | 0.001302 | IL6, MMP1, MMP2, RARA, PRKCA, IKBKG, FGF1, HIF1A, MMP9, RELA, NFKB1, VEGFA |
| hsa00330: Arginine and proline metabolism | 5 | 6.493506 | 0.001352 | MAOB, P4HA1, ALDH2, ALDH1B1, MAOA |
| hsa05134: Legionellosis | 5 | 6.493506 | 0.001803 | IL6, RELA, NFKB1, HSPD1, HSPA1A |
| hsa05161: Hepatitis B | 7 | 9.090909 | 0.002742 | IL6, CREB1, PRKCA, IKBKG, MMP9, RELA, NFKB1 |
| hsa04010: MAPK signaling pathway | 9 | 11.68831 | 0.002986 | RPS6KA3, NR4A1, PRKCA, IKBKG, MAPT, FGF1, RELA, NFKB1, HSPA1A |
| hsa05205: Proteoglycans in cancer | 8 | 10.38961 | 0.003139 | MMP2, PTPN6, PTPN11, PRKCA, HIF1A, ESR1, MMP9, VEGFA |
| hsa05142: Chagas disease (American trypanosomiasis) | 6 | 7.792208 | 0.003296 | IL6, SERPINE1, IKBKG, RELA, NFKB1, IL2 |
| hsa04668: TNF signaling pathway | 6 | 7.792208 | 0.003726 | IL6, CREB1, IKBKG, MMP9, RELA, NFKB1 |
| hsa05202: Transcriptional misregulation in cancer | 7 | 9.090909 | 0.005495 | IL6, BCL2A1, IGFBP3, RARA, MMP9, RELA, NFKB1 |
| hsa04151: PI3K-Akt signaling pathway | 10 | 12.98701 | 0.005885 | NR4A1, IL6, CREB1, PRKCA, IKBKG, FGF1, RELA, NFKB1, IL2, VEGFA |
| hsa05219: Bladder cancer | 4 | 5.194805 | 0.007229 | MMP1, MMP2, MMP9, VEGFA |
| hsa05215: Prostate cancer | 5 | 6.493506 | 0.010389 | CREB1, SRD5A2, IKBKG, RELA, NFKB1 |
| hsa04915: Estrogen signaling pathway | 5 | 6.493506 | 0.015491 | CREB1, MMP2, ESR1, MMP9, HSPA1A |
| hsa04660: T cell receptor signaling pathway | 5 | 6.493506 | 0.016021 | PTPN6, IKBKG, RELA, NFKB1, IL2 |
| hsa04621: NOD-like receptor signaling pathway | 4 | 5.194805 | 0.016953 | IL6, IKBKG, RELA, NFKB1 |
| hsa05221: Acute myeloid leukemia | 4 | 5.194805 | 0.016953 | RARA, IKBKG, RELA, NFKB1 |
| hsa00140: Steroid hormone biosynthesis | 4 | 5.194805 | 0.018614 | HSD11B1, SRD5A2, CYP1A1, CYP19A1 |
| hsa00561: Glycerolipid metabolism | 4 | 5.194805 | 0.018614 | AKR1B10, ALDH2, ALDH1B1, AKR1B1 |
| hsa04620: Toll-like receptor signaling pathway | 5 | 6.493506 | 0.019438 | TLR1, IL6, IKBKG, RELA, NFKB1 |
| hsa00590: Arachidonic acid metabolism | 4 | 5.194805 | 0.021269 | CBR1, CYP2C8, ALOX5, ALOX12 |
| hsa05145: Toxoplasmosis | 5 | 6.493506 | 0.02195 | ALOX5, IKBKG, RELA, NFKB1, HSPA1A |
| hsa04014: Ras signaling pathway | 7 | 9.090909 | 0.022154 | PTPN11, PRKCA, IKBKG, FGF1, RELA, NFKB1, VEGFA |
| hsa05321: Inflammatory bowel disease (IBD) | 4 | 5.194805 | 0.024121 | IL6, RELA, NFKB1, IL2 |
| hsa04623: Cytosolic DNA-sensing pathway | 4 | 5.194805 | 0.024121 | IL6, IKBKG, RELA, NFKB1 |
| hsa05212: Pancreatic cancer | 4 | 5.194805 | 0.025116 | IKBKG, RELA, NFKB1, VEGFA |
| hsa05031: Amphetamine addiction | 4 | 5.194805 | 0.026133 | CREB1, MAOB, MAOA, PRKCA |
| hsa05120: Epithelial cell signaling in Helicobacter pylori infection | 4 | 5.194805 | 0.027171 | PTPN11, IKBKG, RELA, NFKB1 |
| hsa05152: Tuberculosis | 6 | 7.792208 | 0.028521 | TLR1, IL6, CREB1, RELA, NFKB1, HSPD1 |
| hsa04662: B cell receptor signaling pathway | 4 | 5.194805 | 0.029314 | PTPN6, IKBKG, RELA, NFKB1 |
| hsa04918: Thyroid hormone synthesis | 4 | 5.194805 | 0.030418 | CREB1, HSPA5, GSR, PRKCA |
| hsa04622: RIG-I-like receptor signaling pathway | 4 | 5.194805 | 0.030418 | PIN1, IKBKG, RELA, NFKB1 |
| hsa04920: Adipocytokine signaling pathway | 4 | 5.194805 | 0.030418 | PTPN11, IKBKG, RELA, NFKB1 |
| hsa05220: Chronic myeloid leukemia | 4 | 5.194805 | 0.032692 | PTPN11, IKBKG, RELA, NFKB1 |
| hsa00052: Galactose metabolism | 3 | 3.896104 | 0.034118 | AKR1B10, GLB1, AKR1B1 |
| hsa05162: Measles | 5 | 6.493506 | 0.04017 | IL6, RELA, NFKB1, IL2, HSPA1A |
| hsa05204: Chemical carcinogenesis | 4 | 5.194805 | 0.04265 | HSD11B1, CBR1, CYP2C8, CYP1A1 |
| hsa04925: Aldosterone synthesis and secretion | 4 | 5.194805 | 0.04399 | NR4A1, CREB1, PRKCE, PRKCA |
