# Supplementary material for: Investigation of the potential mechanism of the Shugan Xiaozhi decoction for the treatment of nonalcoholic fatty liver disease based on network pharmacology, molecular docking and molecular dynamics simulation
Source: PeerJ journal article supplement (doi:10.7717/peerj.14171), 2022-11-10
Supplement: Supplementary_Table_S2.xlsx [file Supplementary_Table_S2.xlsx]

## Sheet: DisGENET
Disease	Disease_id	Gene	Gene_id	UniProt	Gene_Full_Name	Protein_Class	N_diseases_g	DSI_g	DPI_g	pLI	Score_gda	EL_gda	EI_gda	N_PMIDs	N_SNPs_gda	First_Ref	Last_Ref
Non-alcoholic Fatty Liver Disease	C0400966	TM6SF2	53345	Q9BZW4	transmembrane 6 superfamily member 2		51	0.638	0.462	3.6097e-05	0.6	limited	0.955	66	1	2014	2020
Non-alcoholic Fatty Liver Disease	C0400966	PNPLA3	80339	Q9NST1	patatin like phospholipase domain containing 3	Enzyme	132	0.556	0.692	5.7409e-08	0.5		0.977	220	15	2008	2020
Non-alcoholic Fatty Liver Disease	C0400966	CYP2E1	1571	P05181	cytochrome P450 family 2 subfamily E member 1		306	0.459	0.885	8.0688e-09	0.4		1	12	0	2005	2019
Non-alcoholic Fatty Liver Disease	C0400966	SIRT1	23411	Q96EB6	sirtuin 1	Epigenetic regulator	675	0.378	0.885	0.087326	0.4		1	42	2	2010	2020
Non-alcoholic Fatty Liver Disease	C0400966	FGF21	26291	Q9NSA1	fibroblast growth factor 21	Signaling	236	0.485	0.769	0.029439	0.4		1	30	0	2010	2019
Non-alcoholic Fatty Liver Disease	C0400966	LEP	3952	P41159	leptin		931	0.349	0.846	0.46491	0.4		1	35	0	2009	2020
Non-alcoholic Fatty Liver Disease	C0400966	NFE2L2	4780	Q16236	nuclear factor, erythroid 2 like 2	Enzyme	823	0.357	0.885	0.0035719	0.4		1	15	0	2011	2020
Non-alcoholic Fatty Liver Disease	C0400966	PPARA	5465	Q07869	peroxisome proliferator activated receptor alpha	Nuclear receptor	408	0.432	0.885	0.030182	0.4		0.979	48	3	2007	2020
Non-alcoholic Fatty Liver Disease	C0400966	ADIPOQ	9370	Q15848	adiponectin, C1Q and collagen domain containing		679	0.376	0.885	4.6434e-09	0.4		0.928	69	7	2005	2020
Non-alcoholic Fatty Liver Disease	C0400966	NR1H4	9971	Q96RI1	nuclear receptor subfamily 1 group H member 4	Nuclear receptor	187	0.513	0.808	0.00093892	0.4		1	12	0	2015	2019
Non-alcoholic Fatty Liver Disease	C0400966	PPARD	5467	Q03181	peroxisome proliferator activated receptor delta	Nuclear receptor	197	0.513	0.846	0.99497	0.38		1	9	0	2006	2020
Non-alcoholic Fatty Liver Disease	C0400966	SREBF1	6720	P36956	sterol regulatory element binding transcription factor 1		159	0.518	0.808	0.014708	0.38		1	9	2	2013	2019
Non-alcoholic Fatty Liver Disease	C0400966	LDLR	3949	P01130	low density lipoprotein receptor		336	0.449	0.885	9.841e-24	0.37		1	10	0	2009	2016
Non-alcoholic Fatty Liver Disease	C0400966	XBP1	7494	P17861	X-box binding protein 1		234	0.477	0.846	0.032014	0.37		1	8	0	2009	2019
Non-alcoholic Fatty Liver Disease	C0400966	CAT	847	P04040	catalase	Enzyme	794	0.359	0.962	1.6263e-10	0.37		1	8	0	2007	2019
Non-alcoholic Fatty Liver Disease	C0400966	FAS	355	P25445	Fas cell surface death receptor		754	0.372	0.923	0.8117	0.36		1	7	0	2011	2018
Non-alcoholic Fatty Liver Disease	C0400966	GNMT	27232	Q14749	glycine N-methyltransferase		57	0.626	0.462	0.0028153	0.35		1	5	0	2010	2019
Non-alcoholic Fatty Liver Disease	C0400966	PEMT	10400	Q9UBM1	phosphatidylethanolamine N-methyltransferase		43	0.653	0.538	0.23456	0.34		1	5	1	2005	2019
Non-alcoholic Fatty Liver Disease	C0400966	CPT1A	1374	P50416	carnitine palmitoyltransferase 1A	Enzyme	143	0.555	0.808	5.114e-09	0.34		1	5	0	2015	2019
Non-alcoholic Fatty Liver Disease	C0400966	NR5A2	2494	O00482	nuclear receptor subfamily 5 group A member 2	Nuclear receptor	116	0.563	0.731	0.23807	0.34		1	4	0	2016	2018
Non-alcoholic Fatty Liver Disease	C0400966	TGFB1	7040	P01137	transforming growth factor beta 1	Signaling	1558	0.287	0.962	0.03685	0.34		1	5	0	2003	2019
Non-alcoholic Fatty Liver Disease	C0400966	AHR	196	P35869	aryl hydrocarbon receptor	Transcription factor	532	0.41	0.923	0.99999	0.33		1	4	0	2017	2020
Non-alcoholic Fatty Liver Disease	C0400966	GSTM1	2944	P09488	glutathione S-transferase mu 1		627	0.38	0.923	0.0020641	0.33		1	3	0	2009	2013
Non-alcoholic Fatty Liver Disease	C0400966	GSTP1	2950	P09211	glutathione S-transferase pi 1		610	0.383	0.923	0.014155	0.33		0.667	3	0	2011	2013
Non-alcoholic Fatty Liver Disease	C0400966	IL1A	3552	P01583	interleukin 1 alpha		1002	0.333	0.962	0.0001602	0.33		1	4	0	2011	2019
Non-alcoholic Fatty Liver Disease	C0400966	JAK2	3717	O60674	Janus kinase 2	Kinase	644	0.385	0.885	0.65372	0.33		1	4	0	2017	2019
Non-alcoholic Fatty Liver Disease	C0400966	PRKCA	5578	P17252	protein kinase C alpha	Kinase	368	0.44	0.846	0.3677	0.33		1	4	0	2018	2019
Non-alcoholic Fatty Liver Disease	C0400966	ABCC2	1244	Q92887	ATP binding cassette subfamily C member 2	Transporter	254	0.483	0.808	5.2025e-47	0.32		1	3	2	2009	2020
Non-alcoholic Fatty Liver Disease	C0400966	KLB	152831	Q86Z14	klotho beta	Enzyme	53	0.647	0.5	0.036433	0.32		1	3	3	2018	2020
Non-alcoholic Fatty Liver Disease	C0400966	ACE	1636	P12821	angiotensin I converting enzyme	Enzyme	1082	0.328	0.923	1.0344e-37	0.32		1	3	0	2011	2018
Non-alcoholic Fatty Liver Disease	C0400966	ALDH2	217	P05091	aldehyde dehydrogenase 2 family member	Enzyme	337	0.457	0.885	3.3959e-10	0.32		1	3	1	2016	2019
Non-alcoholic Fatty Liver Disease	C0400966	GSTT1	2952	P30711	glutathione S-transferase theta 1		541	0.393	0.923	0.00014834	0.32		0.667	3	0	2011	2013
Non-alcoholic Fatty Liver Disease	C0400966	PTEN	5728	P60484	phosphatase and tensin homolog	Enzyme	1349	0.305	0.923	0.25651	0.32		1	3	0	2010	2018
Non-alcoholic Fatty Liver Disease	C0400966	CD14	929	P08571	CD14 molecule		551	0.392	0.885	4.8813e-05	0.32		1	3	0	2010	2017
Non-alcoholic Fatty Liver Disease	C0400966	NQO1	1728	P15559	NAD(P)H quinone dehydrogenase 1		368	0.434	0.885	1.1867e-09	0.31		1	2	0	2017	2018
Non-alcoholic Fatty Liver Disease	C0400966	FOLR2	2350	P14207	folate receptor beta		105	0.559	0.654	5.4816e-06	0.31		1	1	0	2019	2019
Non-alcoholic Fatty Liver Disease	C0400966	GSTA1	2938	P08263	glutathione S-transferase alpha 1		108	0.561	0.731	1.7305e-06	0.31		1	1	0	2013	2013
Non-alcoholic Fatty Liver Disease	C0400966	IL4	3565	P05112	interleukin 4		996	0.332	0.962	0.0047372	0.31		1	2	0	2011	2019
Non-alcoholic Fatty Liver Disease	C0400966	LIF	3976	P15018	LIF interleukin 6 family cytokine	Signaling	236	0.483	0.769	0.5242	0.31		1	2	0	2011	2020
Non-alcoholic Fatty Liver Disease	C0400966	PDK4	5166	Q16654	pyruvate dehydrogenase kinase 4	Kinase	85	0.578	0.577	9.142e-12	0.31		1	2	0	2018	2018
Non-alcoholic Fatty Liver Disease	C0400966	PRKCD	5580	Q05655	protein kinase C delta	Kinase	287	0.48	0.846	0.99995	0.31		1	2	0	2017	2018
Non-alcoholic Fatty Liver Disease	C0400966	PRKCE	5581	Q02156	protein kinase C epsilon	Kinase	112	0.597	0.692	0.99988	0.31		1	2	0	2013	2018
Non-alcoholic Fatty Liver Disease	C0400966	VLDLR	7436	P98155	very low density lipoprotein receptor		143	0.558	0.692	1.9617e-11	0.31		1	1	0	2018	2018
Non-alcoholic Fatty Liver Disease	C0400966	ADH1A	124	P07327	alcohol dehydrogenase 1A (class I), alpha polypeptide	Enzyme	50	0.647	0.577	1.7118e-11	0.3		1	1	0	2018	2018
Non-alcoholic Fatty Liver Disease	C0400966	ADH1B	125	P00325	alcohol dehydrogenase 1B (class I), beta polypeptide	Enzyme	224	0.502	0.846	9.934e-07	0.3		1	1	0	2018	2018
Non-alcoholic Fatty Liver Disease	C0400966	ADH4	127	P08319	alcohol dehydrogenase 4 (class II), pi polypeptide	Enzyme	53	0.641	0.462	8.0684e-07	0.3		1	1	0	2018	2018
Non-alcoholic Fatty Liver Disease	C0400966	CSF2	1437	P04141	colony stimulating factor 2	Signaling	1028	0.33	0.962	0.83468	0.3		1	1	0	2011	2011
Non-alcoholic Fatty Liver Disease	C0400966	CYP1A2	1544	P05177	cytochrome P450 family 1 subfamily A member 2	Enzyme	218	0.494	0.923	2.4795e-10	0.3		1	1	0	2016	2016
Non-alcoholic Fatty Liver Disease	C0400966	CYP17A1	1586	P05093	cytochrome P450 family 17 subfamily A member 1		326	0.462	0.769	0.00026255	0.3		1	1	0	2005	2005
Non-alcoholic Fatty Liver Disease	C0400966	AHCY	191	P23526	adenosylhomocysteinase	Enzyme	107	0.582	0.692	0.035922	0.3		1	1	0	2018	2018
Non-alcoholic Fatty Liver Disease	C0400966	F2	2147	P00734	coagulation factor II, thrombin	Enzyme	490	0.415	0.885	0.0011118	0.3		1	1	0	2012	2012
Non-alcoholic Fatty Liver Disease	C0400966	ALDH1A1	216	P00352	aldehyde dehydrogenase 1 family member A1	Enzyme	270	0.46	0.846	0.95448	0.3		1	1	0	2018	2018
Non-alcoholic Fatty Liver Disease	C0400966	ALDH1B1	219	P30837	aldehyde dehydrogenase 1 family member B1	Enzyme	31	0.691	0.462	2.6981e-06	0.3		1	1	0	2018	2018
Non-alcoholic Fatty Liver Disease	C0400966	B3GAT1	27087	Q9P2W7	beta-1,3-glucuronyltransferase 1	Enzyme	199	0.494	0.769	0.13521	0.3		1	1	0	2014	2014
Non-alcoholic Fatty Liver Disease	C0400966	EIF2AK1	27102	Q9BQI3	eukaryotic translation initiation factor 2 alpha kinase 1	Kinase	56	0.633	0.577	7.0148e-07	0.3		1	1	0	2018	2018
Non-alcoholic Fatty Liver Disease	C0400966	LAMA1	284217	P25391	laminin subunit alpha 1		107	0.582	0.808	3.2248e-32	0.3		1	1	0	2011	2011
Non-alcoholic Fatty Liver Disease	C0400966	IL3	3562	P08700	interleukin 3		211	0.489	0.731	2.5874e-09	0.3		1	1	0	2011	2011
Non-alcoholic Fatty Liver Disease	C0400966	MMP1	4312	P03956	matrix metallopeptidase 1	Enzyme	589	0.385	0.885	7.7197e-18	0.3		1	1	0	2011	2011
Non-alcoholic Fatty Liver Disease	C0400966	SERPINB2	5055	P05120	serpin family B member 2	Enzyme modulator	183	0.502	0.808	6.3773e-12	0.3		1	1	0	2011	2011
Non-alcoholic Fatty Liver Disease	C0400966	ABCB4	5244	P21439	ATP binding cassette subfamily B member 4	Transporter	157	0.529	0.615	2.2138e-07	0.3		1	1	0	2010	2010
Non-alcoholic Fatty Liver Disease	C0400966	PRF1	5551	P14222	perforin 1		163	0.54	0.692	5.4875e-06	0.3		1	1	0	2014	2014
Non-alcoholic Fatty Liver Disease	C0400966	PRKACA	5566	P17612	protein kinase cAMP-activated catalytic subunit alpha	Kinase	88	0.606	0.692	0.97142	0.3		1	1	0	2018	2018
Non-alcoholic Fatty Liver Disease	C0400966	TRIB3	57761	Q96RU7	tribbles pseudokinase 3	Kinase	104	0.573	0.692	1.1597e-13	0.3		1	1	0	2018	2018
Non-alcoholic Fatty Liver Disease	C0400966	RAG2	5897	P55895	recombination activating 2		207	0.507	0.769	0.020287	0.3		1	1	0	2014	2014
Non-alcoholic Fatty Liver Disease	C0400966	RDX	5962	P35241	radixin	Cellular structure	80	0.593	0.615	0.85245	0.3		1	1	0	2018	2018
Non-alcoholic Fatty Liver Disease	C0400966	TNFRSF1B	7133	P20333	TNF receptor superfamily member 1B		417	0.425	0.885	0.50201	0.3		1	1	0	2010	2010
Non-alcoholic Fatty Liver Disease	C0400966	IKBKG	8517	Q9Y6K9	inhibitor of nuclear factor kappa B kinase regulatory subunit gamma	Kinase	252	0.493	0.769	0.084853	0.3		1	1	0	2011	2011
Non-alcoholic Fatty Liver Disease	C0400966	STC2	8614	O76061	stanniocalcin 2	Signaling	88	0.573	0.692	0.26588	0.3		1	1	0	2014	2014
Non-alcoholic Fatty Liver Disease	C0400966	ALDH4A1	8659	P30038	aldehyde dehydrogenase 4 family member A1		12	0.792	0.231	1.3725e-05	0.3		1	1	0	2018	2018
Non-alcoholic Fatty Liver Disease	C0400966	SCARB1	949	Q8WTV0	scavenger receptor class B member 1	Receptor	116	0.559	0.731	0.066228	0.3		1	1	0	2013	2013
Non-alcoholic Fatty Liver Disease	C0400966	GCKR	2646	Q14397	glucokinase regulator		136	0.604	0.615	8.5354e-19	0.2		1	21	2	2011	2020
Non-alcoholic Fatty Liver Disease	C0400966	ATP5F1B	506	P06576	ATP synthase F1 subunit beta	Transporter	62	0.626	0.654	0.97679	0.2		1	1	0	2015	2015
Non-alcoholic Fatty Liver Disease	C0400966	NCAN	1463	O14594	neurocan	Extracellular structure	44	0.67	0.5	0.068	0.18		0.875	8	1	2011	2019
Non-alcoholic Fatty Liver Disease	C0400966	PARVB	29780	Q9HBI1	parvin beta	Cellular structure	25	0.736	0.385	2.3813e-13	0.14		1	4	4	2013	2016
Non-alcoholic Fatty Liver Disease	C0400966	SAMM50	25813	Q9Y512	SAMM50 sorting and assembly machinery component		14	0.78	0.269	4.8795e-09	0.13		1	5	9	2012	2018
Non-alcoholic Fatty Liver Disease	C0400966	FDFT1	2222	P37268	farnesyl-diphosphate farnesyltransferase 1		62	0.621	0.615	4.0998e-15	0.12		1	2	1	2010	2014
Non-alcoholic Fatty Liver Disease	C0400966	PTPRD	5789	P23468	protein tyrosine phosphatase receptor type D	Enzyme	93	0.584	0.731	1	0.11		1	2	2	2018	2019
Non-alcoholic Fatty Liver Disease	C0400966	ZGLP1	100125288	P0C6A0	zinc finger GATA like protein 1		186	0.512	0.808	0.3868	0.1		1	12	0	2011	2020
Non-alcoholic Fatty Liver Disease	C0400966	PPARGC1A	10891	Q9UBK2	PPARG coactivator 1 alpha	Transcription factor	350	0.453	0.885	0.9973	0.1		1	12	2	2007	2020
Non-alcoholic Fatty Liver Disease	C0400966	NLRP3	114548	Q96P20	NLR family pyrin domain containing 3		805	0.361	0.962	0.00081103	0.1		1	27	0	2013	2020
Non-alcoholic Fatty Liver Disease	C0400966	OSBPL5	114879	Q9H0X9	oxysterol binding protein like 5		14	0.792	0.346	4.6494e-06	0.1		1	1	1	2019	2019
Non-alcoholic Fatty Liver Disease	C0400966	COL13A1	1305	Q5TAT6	collagen type XIII alpha 1 chain		139	0.608	0.654	3.7355e-14	0.1		1	1	1	2010	2010
Non-alcoholic Fatty Liver Disease	C0400966	CRP	1401	P02741	C-reactive protein		1483	0.299	0.962	0.0036969	0.1		1	25	1	2011	2019
Non-alcoholic Fatty Liver Disease	C0400966	DPP4	1803	P27487	dipeptidyl peptidase 4	Enzyme	451	0.42	0.808	7.2797e-09	0.1		1	11	0	2012	2019
Non-alcoholic Fatty Liver Disease	C0400966	ERBB4	2066	Q15303	erb-b2 receptor tyrosine kinase 4	Kinase	317	0.455	0.846	0.99912	0.1		1	1	1	2019	2019
Non-alcoholic Fatty Liver Disease	C0400966	FBL	2091	P22087	fibrillarin	Enzyme	94	0.572	0.654	0.99319	0.1		0.962	52	0	2014	2020
Non-alcoholic Fatty Liver Disease	C0400966	ALB	213	P02768	albumin	Transporter	1198	0.317	0.962	0.64329	0.1		1	14	0	2016	2020
Non-alcoholic Fatty Liver Disease	C0400966	EHBP1L1	254102	Q8N3D4	EH domain binding protein 1 like 1		12	0.89	0.115	7.1163e-13	0.1		1	1	1	2010	2010
Non-alcoholic Fatty Liver Disease	C0400966	GCG	2641	P01275	glucagon		441	0.431	0.885	0.034814	0.1		0.958	24	0	2011	2020
Non-alcoholic Fatty Liver Disease	C0400966	SLC17A5	26503	Q9NRA2	solute carrier family 17 member 5	Transporter	252	0.491	0.808	6.8514e-10	0.1		1	22	1	2011	2019
Non-alcoholic Fatty Liver Disease	C0400966	GGT1	2678	P19440	gamma-glutamyltransferase 1	Enzyme	209	0.496	0.885	7.5307e-05	0.1		1	12	0	2010	2019
Non-alcoholic Fatty Liver Disease	C0400966	GLP1R	2740	P43220	glucagon like peptide 1 receptor	G-protein coupled receptor	288	0.471	0.846	0.29347	0.1		1	18	0	2011	2020
Non-alcoholic Fatty Liver Disease	C0400966	GPT	2875	P24298	glutamic--pyruvic transaminase	Enzyme	511	0.403	0.923	3.5945e-19	0.1		0.975	159	0	2010	2020
Non-alcoholic Fatty Liver Disease	C0400966	HFE	3077	Q30201	homeostatic iron regulator		415	0.436	0.846	2.5587e-08	0.1		0.75	12	3	2003	2016
Non-alcoholic Fatty Liver Disease	C0400966	APOC3	345	P02656	apolipoprotein C3		153	0.531	0.731	0.010024	0.1		0.882	17	4	2010	2019
Non-alcoholic Fatty Liver Disease	C0400966	IGF1	3479	P05019	insulin like growth factor 1		1206	0.318	0.885	0.2716	0.1		0.933	15	0	2013	2020
Non-alcoholic Fatty Liver Disease	C0400966	IL1B	3553	P01584	interleukin 1 beta		1801	0.276	0.962	0.13005	0.1		1	12	0	2014	2019
Non-alcoholic Fatty Liver Disease	C0400966	IL6	3569	P05231	interleukin 6		2367	0.248	0.962	0.31536	0.1		0.939	33	1	2007	2019
Non-alcoholic Fatty Liver Disease	C0400966	KRT18	3875	P05783	keratin 18		151	0.53	0.692	0.73477	0.1		1	14	0	2017	2019
Non-alcoholic Fatty Liver Disease	C0400966	LEPR	3953	P48357	leptin receptor	Signaling	416	0.433	0.808	0.99475	0.1		1	10	5	2009	2019
Non-alcoholic Fatty Liver Disease	C0400966	LIPA	3988	P38571	lipase A, lysosomal acid type	Enzyme	130	0.564	0.654	5.532e-07	0.1		1	10	0	2013	2019
Non-alcoholic Fatty Liver Disease	C0400966	MIR122	406906		microRNA 122		250	0.468	0.808		0.1		1	20	0	2011	2019
Non-alcoholic Fatty Liver Disease	C0400966	MIR21	406991		microRNA 21		726	0.363	0.846		0.1		1	10	0	2015	2020
Non-alcoholic Fatty Liver Disease	C0400966	MIR34A	407040		microRNA 34a		428	0.421	0.846		0.1		0.941	17	0	2011	2019
Non-alcoholic Fatty Liver Disease	C0400966	MTTP	4547	P55157	microsomal triglyceride transfer protein	Transporter	209	0.505	0.846	1.04e-05	0.1		1	14	10	2007	2020
Non-alcoholic Fatty Liver Disease	C0400966	PIK3CA	5290	P42336	phosphatidylinositol-4,5-bisphosphate 3-kinase catalytic subunit alpha	Kinase	1511	0.292	0.923	1	0.1		1	11	0	2017	2019
Non-alcoholic Fatty Liver Disease	C0400966	PIK3CB	5291	P42338	phosphatidylinositol-4,5-bisphosphate 3-kinase catalytic subunit beta	Kinase	1083	0.322	0.885	0.99964	0.1		1	11	0	2017	2019
Non-alcoholic Fatty Liver Disease	C0400966	PIK3CD	5293	O00329	phosphatidylinositol-4,5-bisphosphate 3-kinase catalytic subunit delta	Kinase	1119	0.319	0.885	0.99999	0.1		1	11	0	2017	2019
Non-alcoholic Fatty Liver Disease	C0400966	PIK3CG	5294	P48736	phosphatidylinositol-4,5-bisphosphate 3-kinase catalytic subunit gamma	Kinase	1101	0.32	0.885	1.4076e-06	0.1		1	11	0	2017	2019
Non-alcoholic Fatty Liver Disease	C0400966	PPARG	5468	P37231	peroxisome proliferator activated receptor gamma	Nuclear receptor	877	0.358	0.885	0.029194	0.1		0.941	34	6	2007	2020
Non-alcoholic Fatty Liver Disease	C0400966	GATAD2A	54815	Q86YP4	GATA zinc finger domain containing 2A	Nucleic acid binding	19	0.792	0.231	0.99957	0.1		1	1	2	2018	2018
Non-alcoholic Fatty Liver Disease	C0400966	PRKAA1	5562	Q13131	protein kinase AMP-activated catalytic subunit alpha 1	Kinase	325	0.453	0.846	0.13725	0.1		1	19	0	2017	2020
Non-alcoholic Fatty Liver Disease	C0400966	PRKAA2	5563	P54646	protein kinase AMP-activated catalytic subunit alpha 2	Kinase	317	0.456	0.846	3.5282e-08	0.1		1	19	0	2017	2020
Non-alcoholic Fatty Liver Disease	C0400966	PRKAB1	5564	Q9Y478	protein kinase AMP-activated non-catalytic subunit beta 1	Kinase	296	0.46	0.846	0.0052573	0.1		1	19	0	2017	2020
Non-alcoholic Fatty Liver Disease	C0400966	RBP4	5950	P02753	retinol binding protein 4	Transporter	217	0.493	0.808	0.51951	0.1		0.833	12	0	2008	2020
Non-alcoholic Fatty Liver Disease	C0400966	SCD	6319	O00767	stearoyl-CoA desaturase		225	0.49	0.808	0.96968	0.1		1	10	0	2016	2020
Non-alcoholic Fatty Liver Disease	C0400966	SHBG	6462	P04278	sex hormone binding globulin		368	0.438	0.808	1.2538e-06	0.1		1	16	0	2017	2020
Non-alcoholic Fatty Liver Disease	C0400966	SLC5A2	6524	P31639	solute carrier family 5 member 2	Transporter	214	0.499	0.769	4.9184e-14	0.1		1	10	0	2016	2020
Non-alcoholic Fatty Liver Disease	C0400966	GGTLC5P	653590		gamma-glutamyltransferase light chain 5 pseudogene		165	0.513	0.846		0.1		1	12	0	2010	2019
Non-alcoholic Fatty Liver Disease	C0400966	SP4	6671	Q02446	Sp4 transcription factor	Nucleic acid binding	30	0.711	0.423	0.99288	0.1		1	1	1	2019	2019
Non-alcoholic Fatty Liver Disease	C0400966	SREBF2	6721	Q12772	sterol regulatory element binding transcription factor 2		112	0.566	0.577	0.20734	0.1		0.923	13	1	2009	2019
Non-alcoholic Fatty Liver Disease	C0400966	TLR4	7099	O00206	toll like receptor 4		1174	0.321	0.962	4.6131e-09	0.1		1	19	3	2009	2020
Non-alcoholic Fatty Liver Disease	C0400966	TNF	7124	P01375	tumor necrosis factor	Signaling	2724	0.231	0.962	0.8033	0.1		0.925	53	0	2002	2020
Non-alcoholic Fatty Liver Disease	C0400966	GGTLC3	728226	B5MD39	gamma-glutamyltransferase light chain family member 3		165	0.513	0.846		0.1		1	12	1	2010	2019
Non-alcoholic Fatty Liver Disease	C0400966	GGT2	728441	P36268	gamma-glutamyltransferase 2		165	0.513	0.846	0.00012986	0.1		1	12	0	2010	2019
Non-alcoholic Fatty Liver Disease	C0400966	GGTLC4P	729838		gamma-glutamyltransferase light chain 4 pseudogene		165	0.513	0.846		0.1		1	12	0	2010	2019
Non-alcoholic Fatty Liver Disease	C0400966	CNBP	7555	P62633	CCHC-type zinc finger nucleic acid binding protein		125	0.556	0.692	0.95994	0.1		1	11	0	2011	2019
Non-alcoholic Fatty Liver Disease	C0400966	MBOAT7	79143	Q96N66	membrane bound O-acyltransferase domain containing 7	Enzyme	83	0.612	0.5	0.113	0.1		0.95	20	3	2016	2019
Non-alcoholic Fatty Liver Disease	C0400966	EHMT1	79813	Q9H9B1	euchromatic histone lysine methyltransferase 1	Epigenetic regulator	371	0.46	0.808	1	0.1		1	15	0	2011	2020
Non-alcoholic Fatty Liver Disease	C0400966	ACTR5	79913	Q9H9F9	actin related protein 5	Cellular structure	2	0.931	0.077	1.1352e-09	0.1		1	1	1	2017	2017
Non-alcoholic Fatty Liver Disease	C0400966	ZNF512	84450	Q96ME7	zinc finger protein 512		15	0.839	0.192	0.9765	0.1		1	1	1	2018	2018
Non-alcoholic Fatty Liver Disease	C0400966	CRACR2A	84766	Q9BSW2	calcium release activated channel regulator 2A		9	0.792	0.231	7.4288e-12	0.1		1	1	1	2010	2010
Non-alcoholic Fatty Liver Disease	C0400966	PLPP7	84814	Q8NBV4	phospholipid phosphatase 7 (inactive)	Enzyme	1	1	0.038	0.0079976	0.1		1	1	1	2019	2019
Non-alcoholic Fatty Liver Disease	C0400966	PWWP3A	84939	Q2TAK8	PWWP domain containing 3A, DNA repair factor		49	0.636	0.385	0.0021523	0.1		1	1	1	2018	2018
Non-alcoholic Fatty Liver Disease	C0400966	TP63	8626	Q9H3D4	tumor protein p63	Transcription factor	816	0.362	0.769	0.99728	0.1		1	1	1	2011	2011
Non-alcoholic Fatty Liver Disease	C0400966	DDX60L	91351	Q5H9U9	DExD/H-box 60 like		4	0.861	0.115	1.0665e-38	0.1		1	1	1	2010	2010
Non-alcoholic Fatty Liver Disease	C0400966	XPR1	9213	Q9UBH6	xenotropic and polytropic retrovirus receptor 1	Transporter	217	0.488	0.731	0.99999	0.1		0.944	18	0	2010	2020
Non-alcoholic Fatty Liver Disease	C0400966	CD36	948	P16671	CD36 molecule	Receptor	351	0.446	0.846	1.0857e-60	0.1		1	10	0	2011	2019
Non-alcoholic Fatty Liver Disease	C0400966	CREB5	9586	Q02930	cAMP responsive element binding protein 5	Transcription factor	48	0.682	0.538	0.22337	0.1		1	1	1	2019	2019
Non-alcoholic Fatty Liver Disease	C0400966	FGF19	9965	O95750	fibroblast growth factor 19	Signaling	123	0.548	0.615	0.57022	0.1		1	10	0	2011	2020
Non-alcoholic Fatty Liver Disease	C0400966	AHSG	197	P02765	alpha 2-HS glycoprotein	Enzyme modulator	204	0.506	0.846	3.209e-10	0.09		1	9	0	2013	2019
Non-alcoholic Fatty Liver Disease	C0400966	FASN	2194	P49327	fatty acid synthase	Enzyme	245	0.474	0.846	1	0.09		1	9	0	2005	2019
Non-alcoholic Fatty Liver Disease	C0400966	GABPA	2551	Q06546	GA binding protein transcription factor subunit alpha	Transcription factor	632	0.379	0.885	0.99812	0.09		1	9	0	2015	2020
Non-alcoholic Fatty Liver Disease	C0400966	GH1	2688	P01241	growth hormone 1	Signaling	686	0.373	0.923	0.030057	0.09		0.889	9	0	2008	2019
Non-alcoholic Fatty Liver Disease	C0400966	LBP	3929	P18428	lipopolysaccharide binding protein		156	0.525	0.808	4.1897e-15	0.09		1	9	0	2007	2019
Non-alcoholic Fatty Liver Disease	C0400966	LGALS3BP	3959	Q08380	galectin 3 binding protein		127	0.546	0.769	2.679e-07	0.09		1	9	0	2017	2019
Non-alcoholic Fatty Liver Disease	C0400966	HAMP	57817	P81172	hepcidin antimicrobial peptide		377	0.433	0.846	0.0081797	0.09		0.778	9	0	2008	2019
Non-alcoholic Fatty Liver Disease	C0400966	REN	5972	P00797	renin	Enzyme	721	0.37	0.923	2.4297e-07	0.09		1	9	0	2016	2019
Non-alcoholic Fatty Liver Disease	C0400966	NR1H3	10062	Q13133	nuclear receptor subfamily 1 group H member 3	Nuclear receptor	102	0.566	0.692	0.90374	0.08		1	8	0	2015	2019
Non-alcoholic Fatty Liver Disease	C0400966	CYP3A4	1576	P08684	cytochrome P450 family 3 subfamily A member 4	Enzyme	291	0.462	0.885	5.7979e-11	0.08		1	8	0	2007	2019
Non-alcoholic Fatty Liver Disease	C0400966	FABP1	2168	P07148	fatty acid binding protein 1		85	0.588	0.692	9.8037e-07	0.08		1	8	1	2013	2019
Non-alcoholic Fatty Liver Disease	C0400966	SIRT3	23410	Q9NTG7	sirtuin 3	Epigenetic regulator	227	0.488	0.731	0.00016261	0.08		1	8	0	2017	2020
Non-alcoholic Fatty Liver Disease	C0400966	HNF4A	3172	P41235	hepatocyte nuclear factor 4 alpha	Nuclear receptor	340	0.461	0.808	0.15285	0.08		1	8	0	2015	2019
Non-alcoholic Fatty Liver Disease	C0400966	HSD17B13	345275	Q7Z5P4	hydroxysteroid 17-beta dehydrogenase 13		58	0.623	0.538	2.7371e-05	0.08		1	8	1	2017	2019
Non-alcoholic Fatty Liver Disease	C0400966	IL17A	3605	Q16552	interleukin 17A		1074	0.324	0.923	0.043049	0.08		1	8	1	2011	2019
Non-alcoholic Fatty Liver Disease	C0400966	MLXIPL	51085	Q9NP71	MLX interacting protein like		165	0.554	0.731	0.047771	0.08		1	8	0	2014	2019
Non-alcoholic Fatty Liver Disease	C0400966	CCL2	6347	P13500	C-C motif chemokine ligand 2	Signaling	1157	0.321	0.962	0.60786	0.08		1	8	0	2007	2020
Non-alcoholic Fatty Liver Disease	C0400966	LOC102724197	102724197		inactive glutathione hydrolase 2		105	0.559	0.731		0.07		1	7	0	2010	2020
Non-alcoholic Fatty Liver Disease	C0400966	AGTR1	185	P30556	angiotensin II receptor type 1	G-protein coupled receptor	440	0.423	0.846	0.00053161	0.07		1	7	9	2009	2019
Non-alcoholic Fatty Liver Disease	C0400966	MTOR	2475	P42345	mechanistic target of rapamycin kinase	Kinase	960	0.343	0.885	1	0.07		1	7	0	2007	2019
Non-alcoholic Fatty Liver Disease	C0400966	FETUB	26998	Q9UGM5	fetuin B	Enzyme modulator	38	0.686	0.308	8.8804e-08	0.07		0.857	7	1	2017	2019
Non-alcoholic Fatty Liver Disease	C0400966	APOE	348	P02649	apolipoprotein E		1049	0.338	0.962	0.0018685	0.07		1	7	0	2007	2019
Non-alcoholic Fatty Liver Disease	C0400966	PON1	5444	P27169	paraoxonase 1		496	0.409	0.885	9.8142e-11	0.07		1	7	1	2017	2019
Non-alcoholic Fatty Liver Disease	C0400966	RETN	56729	Q9HD89	resistin		302	0.454	0.808	0.036545	0.07		1	7	0	2006	2018
Non-alcoholic Fatty Liver Disease	C0400966	RARRES2	5919	Q99969	retinoic acid receptor responder 2		180	0.519	0.731	2.716e-05	0.07		1	7	0	2012	2018
Non-alcoholic Fatty Liver Disease	C0400966	UCP2	7351	P55851	uncoupling protein 2	Transporter	235	0.493	0.808	1.5497e-10	0.07		1	7	1	2005	2019
Non-alcoholic Fatty Liver Disease	C0400966	NR0B2	8431	Q15466	nuclear receptor subfamily 0 group B member 2	Nuclear receptor	251	0.474	0.808	8.3377e-06	0.07		1	7	0	2015	2018
Non-alcoholic Fatty Liver Disease	C0400966	GGTLC1	92086	Q9BX51	gamma-glutamyltransferase light chain 1	Enzyme	105	0.559	0.731	3.3367e-05	0.07		1	7	0	2010	2020
Non-alcoholic Fatty Liver Disease	C0400966	DECR1	1666	Q16698	2,4-dienoyl-CoA reductase 1	Enzyme	399	0.426	0.885	4.4689e-14	0.06		1	6	0	2017	2018
Non-alcoholic Fatty Liver Disease	C0400966	PCSK9	255738	Q8NBP7	proprotein convertase subtilisin/kexin type 9	Enzyme	257	0.482	0.808	2.7059e-17	0.06		1	6	0	2016	2019
Non-alcoholic Fatty Liver Disease	C0400966	ACACA	31	Q13085	acetyl-CoA carboxylase alpha		241	0.48	0.846	1	0.06		1	6	0	2005	2020
Non-alcoholic Fatty Liver Disease	C0400966	HMGB1	3146	P09429	high mobility group box 1	Nucleic acid binding	724	0.368	0.923	0.82035	0.06		1	6	0	2015	2019
Non-alcoholic Fatty Liver Disease	C0400966	APOB	338	P04114	apolipoprotein B		339	0.453	0.808	1.9234e-16	0.06		1	6	0	2005	2019
Non-alcoholic Fatty Liver Disease	C0400966	IL10	3586	P22301	interleukin 10		1679	0.281	0.923	0.0058874	0.06		1	6	0	2010	2019
Non-alcoholic Fatty Liver Disease	C0400966	LPL	4023	P06858	lipoprotein lipase	Enzyme	290	0.474	0.808	1.2712e-09	0.06		1	6	3	2007	2019
Non-alcoholic Fatty Liver Disease	C0400966	MIR192	406967		microRNA 192		173	0.503	0.846		0.06		1	6	0	2014	2019
Non-alcoholic Fatty Liver Disease	C0400966	MTHFR	4524	P42898	methylenetetrahydrofolate reductase		985	0.337	0.885	3.2068e-10	0.06		0.667	6	2	2007	2016
Non-alcoholic Fatty Liver Disease	C0400966	SERPINE1	5054	P05121	serpin family E member 1	Enzyme modulator	770	0.359	0.885	0.043609	0.06		0.833	6	0	2008	2018
Non-alcoholic Fatty Liver Disease	C0400966	ANGPTL8	55908	Q6UXH0	angiopoietin like 8		54	0.65	0.577	6.8776e-12	0.06		1	6	0	2017	2019
Non-alcoholic Fatty Liver Disease	C0400966	SOD1	6647	P00441	superoxide dismutase 1	Enzyme	689	0.379	0.962	0.1773	0.06		1	6	0	2017	2020
Non-alcoholic Fatty Liver Disease	C0400966	TP53	7157	P04637	tumor protein p53	Transcription factor	2494	0.236	0.962	0.53235	0.06		1	6	0	2013	2020
Non-alcoholic Fatty Liver Disease	C0400966	VDR	7421	P11473	vitamin D receptor	Nuclear receptor	852	0.352	0.885	1.6787e-05	0.06		1	6	0	2015	2019
Non-alcoholic Fatty Liver Disease	C0400966	IRS2	8660	Q9Y4H2	insulin receptor substrate 2		152	0.535	0.654	0.99032	0.06		0.833	6	0	2008	2018
Non-alcoholic Fatty Liver Disease	C0400966	TRIB1	10221	Q96RU8	tribbles pseudokinase 1	Kinase	61	0.617	0.577	0.83343	0.05		1	5	0	2014	2019
Non-alcoholic Fatty Liver Disease	C0400966	TXNIP	10628	Q9H3M7	thioredoxin interacting protein		208	0.49	0.731	0.15918	0.05		1	5	0	2013	2019
Non-alcoholic Fatty Liver Disease	C0400966	PLIN2	123	Q99541	perilipin 2	Transporter	100	0.564	0.692	7.5281e-09	0.05		1	5	0	2016	2020
Non-alcoholic Fatty Liver Disease	C0400966	CNR1	1268	P21554	cannabinoid receptor 1	G-protein coupled receptor	393	0.446	0.808	0.50652	0.05		1	5	0	2017	2019
Non-alcoholic Fatty Liver Disease	C0400966	CYBB	1536	P04839	cytochrome b-245 beta chain	Ion channel	343	0.452	0.885	0.99904	0.05		1	5	0	2017	2020
Non-alcoholic Fatty Liver Disease	C0400966	AKT1	207	P31749	AKT serine/threonine kinase 1	Kinase	1250	0.311	0.962	0.9759	0.05		1	5	0	2010	2019
Non-alcoholic Fatty Liver Disease	C0400966	ABCD1	215	P33897	ATP binding cassette subfamily D member 1	Transporter	154	0.563	0.731	0.99896	0.05		1	5	0	2008	2019
Non-alcoholic Fatty Liver Disease	C0400966	FOXO1	2308	Q12778	forkhead box O1		380	0.433	0.846	0.99725	0.05		1	5	0	2017	2019
Non-alcoholic Fatty Liver Disease	C0400966	GOLGA6A	342096	Q9NYA3	golgin A6 family member A		90	0.592	0.654	1.61e-05	0.05		1	5	0	2017	2019
Non-alcoholic Fatty Liver Disease	C0400966	APRT	353	P07741	adenine phosphoribosyltransferase		384	0.423	0.846	5.4539e-13	0.05		1	5	0	2008	2020
Non-alcoholic Fatty Liver Disease	C0400966	IRS1	3667	P35568	insulin receptor substrate 1		233	0.488	0.769	0.023645	0.05		0.8	5	0	2008	2018
Non-alcoholic Fatty Liver Disease	C0400966	MIR33A	407039		microRNA 33a		100	0.56	0.654		0.05		1	5	0	2016	2019
Non-alcoholic Fatty Liver Disease	C0400966	MFAP1	4236	P55081	microfibril associated protein 1	Extracellular structure	357	0.431	0.846	0.79602	0.05		1	5	0	2008	2020
Non-alcoholic Fatty Liver Disease	C0400966	NR3C2	4306	P08235	nuclear receptor subfamily 3 group C member 2	Nuclear receptor	287	0.469	0.846	0.83739	0.05		1	5	0	2010	2018
Non-alcoholic Fatty Liver Disease	C0400966	SERPINA1	5265	P01009	serpin family A member 1	Enzyme modulator	482	0.41	0.923	6.8497e-08	0.05		1	5	0	2006	2019
Non-alcoholic Fatty Liver Disease	C0400966	RCBTB1	55213	Q8NDN9	RCC1 and BTB domain containing protein 1	Enzyme modulator	112	0.572	0.692	1.5605e-06	0.05		1	5	0	2017	2019
Non-alcoholic Fatty Liver Disease	C0400966	PNPLA2	57104	Q96AD5	patatin like phospholipase domain containing 2	Enzyme	199	0.511	0.846	0.0041069	0.05		0.8	5	0	2016	2019
Non-alcoholic Fatty Liver Disease	C0400966	SELENOP	6414	P49908	selenoprotein P	Extracellular structure	138	0.545	0.769	8.2884e-07	0.05		1	5	0	2017	2020
Non-alcoholic Fatty Liver Disease	C0400966	SOD2	6648	P04179	superoxide dismutase 2	Enzyme	668	0.379	0.923	0.15499	0.05		1	5	1	2012	2020
Non-alcoholic Fatty Liver Disease	C0400966	STAT3	6774	P40763	signal transducer and activator of transcription 3	Nucleic acid binding	1193	0.32	0.923	1	0.05		0.8	5	2	2008	2019
Non-alcoholic Fatty Liver Disease	C0400966	PPP1R3B	79660	Q86XI6	protein phosphatase 1 regulatory subunit 3B	Enzyme modulator	31	0.686	0.462	0.065025	0.05		1	5	1	2013	2019
Non-alcoholic Fatty Liver Disease	C0400966	NR1I2	8856	O75469	nuclear receptor subfamily 1 group I member 2	Nuclear receptor	462	0.418	0.846	7.2668e-09	0.05		1	5	0	2010	2019
Non-alcoholic Fatty Liver Disease	C0400966	FADS2	9415	O95864	fatty acid desaturase 2		140	0.575	0.692	0.99815	0.05		0.8	5	1	2017	2019
Non-alcoholic Fatty Liver Disease	C0400966	CEBPA	1050	P49715	CCAAT enhancer binding protein alpha	Transcription factor	201	0.496	0.692	0.55365	0.04		1	4	0	2013	2019
Non-alcoholic Fatty Liver Disease	C0400966	CETP	1071	P11597	cholesteryl ester transfer protein		188	0.512	0.731	1.1892e-23	0.04		1	4	1	2014	2018
Non-alcoholic Fatty Liver Disease	C0400966	SLC27A5	10998	Q9Y2P5	solute carrier family 27 member 5	Transporter	111	0.563	0.769	8.3678e-15	0.04		1	4	1	2008	2020
Non-alcoholic Fatty Liver Disease	C0400966	APOA5	116519	Q6Q788	apolipoprotein A5		107	0.587	0.615	5.5765e-10	0.04		0.75	4	4	2011	2018
Non-alcoholic Fatty Liver Disease	C0400966	COL1A1	1277	P02452	collagen type I alpha 1 chain		487	0.43	0.808	1	0.04		1	4	0	2010	2018
Non-alcoholic Fatty Liver Disease	C0400966	KLF6	1316	Q99612	Kruppel like factor 6	Nucleic acid binding	204	0.501	0.846	0.97946	0.04		1	4	0	2008	2019
Non-alcoholic Fatty Liver Disease	C0400966	NRG4	145957	Q8WWG1	neuregulin 4	Signaling	71	0.623	0.654	0.027981	0.04		1	4	0	2014	2019
Non-alcoholic Fatty Liver Disease	C0400966	TMC4	147798	Q7Z404	transmembrane channel like 4	Ion channel	12	0.805	0.192	1.7195e-13	0.04		1	4	2	2016	2018
Non-alcoholic Fatty Liver Disease	C0400966	EGFR	1956	P00533	epidermal growth factor receptor	Kinase	1394	0.295	0.885	0.36837	0.04		1	4	0	2017	2019
Non-alcoholic Fatty Liver Disease	C0400966	EPAS1	2034	Q99814	endothelial PAS domain protein 1	Transcription factor	293	0.454	0.731	0.5961	0.04		1	4	0	2018	2019
Non-alcoholic Fatty Liver Disease	C0400966	FABP4	2167	P15090	fatty acid binding protein 4		194	0.5	0.808	5.1764e-05	0.04		1	4	0	2007	2019
Non-alcoholic Fatty Liver Disease	C0400966	FGL1	2267	Q08830	fibrinogen like 1	Signaling	53	0.638	0.692	1.6765e-25	0.04		1	4	0	2013	2019
Non-alcoholic Fatty Liver Disease	C0400966	FLII	2314	Q13045	FLII actin remodeling protein		198	0.52	0.808	5.5313e-12	0.04		1	4	0	2017	2020
Non-alcoholic Fatty Liver Disease	C0400966	GCK	2645	P35557	glucokinase	Kinase	210	0.523	0.808	0.63464	0.04		1	4	0	2012	2016
Non-alcoholic Fatty Liver Disease	C0400966	IFNL3	282617	Q8IZI9	interferon lambda 3		175	0.506	0.808	2.4233e-08	0.04		1	4	0	2012	2017
Non-alcoholic Fatty Liver Disease	C0400966	HIF1A	3091	Q16665	hypoxia inducible factor 1 subunit alpha	Transcription factor	1044	0.327	0.923	0.9777	0.04		1	4	0	2014	2019
Non-alcoholic Fatty Liver Disease	C0400966	HP	3240	P00738	haptoglobin	Enzyme	464	0.412	0.885	1.736e-05	0.04		1	4	0	2008	2019
Non-alcoholic Fatty Liver Disease	C0400966	HSD11B1	3290	P28845	hydroxysteroid 11-beta dehydrogenase 1		163	0.52	0.731	0.41696	0.04		1	4	3	2013	2018
Non-alcoholic Fatty Liver Disease	C0400966	IFNG	3458	P01579	interferon gamma		1519	0.288	0.962	0.47156	0.04		1	4	0	2015	2019
Non-alcoholic Fatty Liver Disease	C0400966	APP	351	P05067	amyloid beta precursor protein	Enzyme modulator	485	0.422	0.846	0.046544	0.04		1	4	0	2016	2019
Non-alcoholic Fatty Liver Disease	C0400966	IL18	3606	Q14116	interleukin 18		750	0.365	0.923	0.030717	0.04		1	4	0	2017	2019
Non-alcoholic Fatty Liver Disease	C0400966	INSR	3643	P06213	insulin receptor	Kinase	452	0.432	0.846	3.6145e-05	0.04		1	4	0	2007	2017
Non-alcoholic Fatty Liver Disease	C0400966	MIR29A	407021		microRNA 29a		278	0.459	0.808		0.04		1	4	0	2017	2019
Non-alcoholic Fatty Liver Disease	C0400966	MAP3K5	4217	Q99683	mitogen-activated protein kinase kinase kinase 5	Kinase	170	0.513	0.808	0.51964	0.04		1	4	0	2018	2019
Non-alcoholic Fatty Liver Disease	C0400966	CHPT1	56994	Q8WUD6	choline phosphotransferase 1	Enzyme	253	0.474	0.846	0.00024252	0.04		1	4	0	2018	2020
Non-alcoholic Fatty Liver Disease	C0400966	BGLAP	632	P02818	bone gamma-carboxyglutamate protein		274	0.462	0.846	4.6155e-08	0.04		1	4	0	2017	2019
Non-alcoholic Fatty Liver Disease	C0400966	SPP1	6696	P10451	secreted phosphoprotein 1		824	0.353	0.885	2.146e-06	0.04		1	4	0	2011	2020
Non-alcoholic Fatty Liver Disease	C0400966	TLR2	7097	O60603	toll like receptor 2		749	0.361	0.923	1.0152e-06	0.04		0.75	4	0	2016	2016
Non-alcoholic Fatty Liver Disease	C0400966	CCR2	729230	P41597	C-C motif chemokine receptor 2		436	0.418	0.846	0.023412	0.04		1	4	2	2017	2020
Non-alcoholic Fatty Liver Disease	C0400966	VEGFA	7422	P15692	vascular endothelial growth factor A	Signaling	1899	0.266	0.923	2.4085e-05	0.04		0.75	4	0	2012	2019
Non-alcoholic Fatty Liver Disease	C0400966	FTO	79068	Q9C0B1	FTO alpha-ketoglutarate dependent dioxygenase		286	0.486	0.885	8.364e-08	0.04		1	4	3	2014	2018
Non-alcoholic Fatty Liver Disease	C0400966	CASP1	834	P29466	caspase 1	Enzyme	444	0.413	0.885	3.5183e-05	0.04		1	4	0	2014	2018
Non-alcoholic Fatty Liver Disease	C0400966	ABCB11	8647	O95342	ATP binding cassette subfamily B member 11	Transporter	126	0.566	0.654	1.5612e-12	0.04		1	4	0	2011	2018
Non-alcoholic Fatty Liver Disease	C0400966	TNFSF10	8743	P50591	TNF superfamily member 10	Signaling	445	0.413	0.885	0.13495	0.04		1	4	1	2009	2018
Non-alcoholic Fatty Liver Disease	C0400966	NAMPT	10135	P43490	nicotinamide phosphoribosyltransferase	Signaling	199	0.502	0.808	0.97914	0.03		1	3	0	2015	2017
Non-alcoholic Fatty Liver Disease	C0400966	FST	10468	P19883	follistatin	Enzyme modulator	182	0.513	0.731	0.98014	0.03		1	3	0	2008	2020
Non-alcoholic Fatty Liver Disease	C0400966	PRRT2	112476	Q7Z6L0	proline rich transmembrane protein 2		353	0.448	0.808	0.57919	0.03		1	3	0	2018	2019
Non-alcoholic Fatty Liver Disease	C0400966	CMKLR1	1240	Q99788	chemerin chemokine-like receptor 1	G-protein coupled receptor	75	0.612	0.692	0.010767	0.03		0.667	3	0	2012	2016
Non-alcoholic Fatty Liver Disease	C0400966	CPT2	1376	P23786	carnitine palmitoyltransferase 2	Enzyme	187	0.542	0.769	4.598e-10	0.03		1	3	0	2018	2019
Non-alcoholic Fatty Liver Disease	C0400966	PARP1	142	P09874	poly(ADP-ribose) polymerase 1		565	0.389	0.923	0.00033366	0.03		1	3	0	2017	2019
Non-alcoholic Fatty Liver Disease	C0400966	CTNNB1	1499	P35222	catenin beta 1		1368	0.303	0.885	0.99999	0.03		1	3	0	2017	2018
Non-alcoholic Fatty Liver Disease	C0400966	GPBAR1	151306	Q8TDU6	G protein-coupled bile acid receptor 1	G-protein coupled receptor	122	0.548	0.731	1.3633e-09	0.03		1	3	0	2017	2018
Non-alcoholic Fatty Liver Disease	C0400966	CYP7A1	1581	P22680	cytochrome P450 family 7 subfamily A member 1	Enzyme	91	0.576	0.615	0.00024507	0.03		1	3	0	2017	2019
Non-alcoholic Fatty Liver Disease	C0400966	DLAT	1737	P10515	dihydrolipoamide S-acetyltransferase		93	0.576	0.731	2.2998e-08	0.03		1	3	0	2015	2018
Non-alcoholic Fatty Liver Disease	C0400966	AFP	174	P02771	alpha fetoprotein	Transporter	392	0.429	0.885	1.1383e-11	0.03		1	3	0	2017	2019
Non-alcoholic Fatty Liver Disease	C0400966	AGER	177	Q15109	advanced glycosylation end-product specific receptor	Receptor	450	0.42	0.885	6.3528e-16	0.03		1	3	0	2017	2018
Non-alcoholic Fatty Liver Disease	C0400966	AGT	183	P01019	angiotensinogen	Enzyme modulator	765	0.367	0.923	4.9706e-08	0.03		0.667	3	0	2003	2019
Non-alcoholic Fatty Liver Disease	C0400966	ABCA1	19	O95477	ATP binding cassette subfamily A member 1	Transporter	291	0.467	0.846	1.4525e-13	0.03		1	3	2	2015	2019
Non-alcoholic Fatty Liver Disease	C0400966	FGFR4	2264	P22455	fibroblast growth factor receptor 4	Kinase	220	0.49	0.769	7.1917e-13	0.03		1	3	0	2011	2020
Non-alcoholic Fatty Liver Disease	C0400966	SMUG1	23583	Q53HV7	single-strand-selective monofunctional uracil-DNA glycosylase 1		1034	0.322	0.923	0.00045154	0.03		1	3	0	2018	2019
Non-alcoholic Fatty Liver Disease	C0400966	GIP	2695	P09681	gastric inhibitory polypeptide		110	0.57	0.654	0.27108	0.03		1	3	0	2009	2020
Non-alcoholic Fatty Liver Disease	C0400966	HPGDS	27306	O60760	hematopoietic prostaglandin D synthase		570	0.388	0.923	1.8063e-06	0.03		1	3	0	2012	2019
Non-alcoholic Fatty Liver Disease	C0400966	GOT2	2806	P00505	glutamic-oxaloacetic transaminase 2		148	0.529	0.731	0.014233	0.03		1	3	2	2007	2016
Non-alcoholic Fatty Liver Disease	C0400966	NEAT1	283131		nuclear paraspeckle assembly transcript 1		179	0.502	0.769		0.03		1	3	0	2018	2019
Non-alcoholic Fatty Liver Disease	C0400966	OR10A4	283297	Q9H209	olfactory receptor family 10 subfamily A member 4	G-protein coupled receptor	128	0.54	0.808	1.6786e-05	0.03		1	3	0	2008	2020
Non-alcoholic Fatty Liver Disease	C0400966	GPX1	2876	P07203	glutathione peroxidase 1	Enzyme	290	0.458	0.923	3.8518e-05	0.03		1	3	0	2011	2016
Non-alcoholic Fatty Liver Disease	C0400966	ANPEP	290	P15144	alanyl aminopeptidase, membrane	Enzyme	280	0.462	0.769	3.7492e-09	0.03		1	3	0	2017	2019
Non-alcoholic Fatty Liver Disease	C0400966	NPC1L1	29881	Q9UHC9	NPC1 like intracellular cholesterol transporter 1	Transporter	40	0.656	0.423	2.3098e-20	0.03		1	3	0	2014	2019
Non-alcoholic Fatty Liver Disease	C0400966	HMOX1	3162	P09601	heme oxygenase 1		666	0.381	0.923	0.0096817	0.03		1	3	0	2005	2019
Non-alcoholic Fatty Liver Disease	C0400966	CXCL10	3627	P02778	C-X-C motif chemokine ligand 10	Signaling	631	0.378	0.885	0.36865	0.03		1	3	0	2017	2019
Non-alcoholic Fatty Liver Disease	C0400966	CYP4F3	4051	Q08477	cytochrome P450 family 4 subfamily F member 3	Enzyme	114	0.551	0.808	3.5413e-16	0.03		1	3	0	2007	2017
Non-alcoholic Fatty Liver Disease	C0400966	ARNTL	406	O00327	aryl hydrocarbon receptor nuclear translocator like	Transcription factor	200	0.51	0.885	0.99444	0.03		1	3	0	2017	2019
Non-alcoholic Fatty Liver Disease	C0400966	MIR140	406932		microRNA 140		144	0.522	0.769		0.03		1	3	0	2018	2019
Non-alcoholic Fatty Liver Disease	C0400966	MIR155	406947		microRNA 155		584	0.384	0.885		0.03		1	3	0	2016	2018
Non-alcoholic Fatty Liver Disease	C0400966	MMP2	4313	P08253	matrix metallopeptidase 2	Enzyme	1021	0.333	0.923	0.83878	0.03		1	3	1	2015	2019
Non-alcoholic Fatty Liver Disease	C0400966	MT1B	4490	P07438	metallothionein 1B		89	0.585	0.731	0.0053775	0.03		1	3	0	2007	2014
Non-alcoholic Fatty Liver Disease	C0400966	ACLY	47	P53396	ATP citrate lyase	Enzyme	109	0.563	0.692	0.083556	0.03		1	3	0	2013	2019
Non-alcoholic Fatty Liver Disease	C0400966	NTS	4922	P30990	neurotensin		184	0.517	0.769	3.8527e-05	0.03		1	3	0	2018	2018
Non-alcoholic Fatty Liver Disease	C0400966	MIR378A	494327		microRNA 378a		127	0.532	0.808		0.03		1	3	0	2018	2019
Non-alcoholic Fatty Liver Disease	C0400966	BCO1	53630	Q9HAY6	beta-carotene oxygenase 1	Enzyme	29	0.705	0.462	5.5008e-12	0.03		1	3	0	2018	2019
Non-alcoholic Fatty Liver Disease	C0400966	PRKCB	5579	P05771	protein kinase C beta	Kinase	317	0.453	0.885	1	0.03		1	3	0	2018	2019
Non-alcoholic Fatty Liver Disease	C0400966	MAPK8	5599	P45983	mitogen-activated protein kinase 8	Kinase	520	0.397	0.885	0.99823	0.03		1	3	0	2017	2019
Non-alcoholic Fatty Liver Disease	C0400966	PRL	5617	P01236	prolactin	Signaling	506	0.406	0.885	2.9015e-07	0.03		1	3	0	2018	2019
Non-alcoholic Fatty Liver Disease	C0400966	MIR451A	574411		microRNA 451a		177	0.505	0.769		0.03		1	3	0	2013	2018
Non-alcoholic Fatty Liver Disease	C0400966	CXCL16	58191	Q9H2A7	C-X-C motif chemokine ligand 16	Signaling	178	0.502	0.769	3.4546e-05	0.03		1	3	0	2017	2018
Non-alcoholic Fatty Liver Disease	C0400966	ACE2	59272	Q9BYF1	angiotensin I converting enzyme 2	Enzyme	253	0.477	0.769	0.99769	0.03		0.667	3	0	2017	2019
Non-alcoholic Fatty Liver Disease	C0400966	BCL2	596	P10415	BCL2 apoptosis regulator	Signaling	1456	0.291	0.885	0.55903	0.03		1	3	0	2014	2019
Non-alcoholic Fatty Liver Disease	C0400966	BCL2A1	597	Q16548	BCL2 related protein A1	Signaling	150	0.529	0.731	0.20785	0.03		1	3	0	2005	2019
Non-alcoholic Fatty Liver Disease	C0400966	SAV1	60485	Q9H4B6	salvador family WW domain containing protein 1		42	0.659	0.5	0.00090373	0.03		1	3	0	2018	2018
Non-alcoholic Fatty Liver Disease	C0400966	SLC10A2	6555	Q12908	solute carrier family 10 member 2	Transporter	66	0.621	0.538	9.5802e-17	0.03		0.667	3	0	2017	2019
Non-alcoholic Fatty Liver Disease	C0400966	SMN1	6606	Q16637	survival of motor neuron 1, telomeric	Epigenetic regulator	317	0.454	0.769	0.015829	0.03		1	3	0	2018	2020
Non-alcoholic Fatty Liver Disease	C0400966	SMN2	6607	Q16637	survival of motor neuron 2, centromeric		299	0.459	0.769	0.10337	0.03		1	3	0	2018	2020
Non-alcoholic Fatty Liver Disease	C0400966	BNIP3	664	Q12983	BCL2 interacting protein 3		158	0.52	0.731	1.9687e-05	0.03		1	3	0	2018	2018
Non-alcoholic Fatty Liver Disease	C0400966	TERT	7015	O14746	telomerase reverse transcriptase	Enzyme	703	0.374	0.846	0.99046	0.03		1	3	0	2014	2017
Non-alcoholic Fatty Liver Disease	C0400966	TIMP1	7076	P01033	TIMP metallopeptidase inhibitor 1	Enzyme modulator	603	0.38	0.885	0.4993	0.03		1	3	0	2019	2019
Non-alcoholic Fatty Liver Disease	C0400966	TIMP2	7077	P16035	TIMP metallopeptidase inhibitor 2	Enzyme modulator	404	0.425	0.846	0.78893	0.03		1	3	0	2017	2019
Non-alcoholic Fatty Liver Disease	C0400966	ADIPOR2	79602	Q86V24	adiponectin receptor 2	Receptor	103	0.564	0.731	0.36218	0.03		1	3	0	2017	2019
Non-alcoholic Fatty Liver Disease	C0400966	BCO2	83875	Q9BYV7	beta-carotene oxygenase 2		19	0.78	0.231	3.7829e-18	0.03		1	3	0	2018	2019
Non-alcoholic Fatty Liver Disease	C0400966	CAV1	857	Q03135	caveolin 1	Enzyme modulator	633	0.388	0.885	0.008274	0.03		1	3	0	2014	2018
Non-alcoholic Fatty Liver Disease	C0400966	GDF15	9518	Q99988	growth differentiation factor 15	Signaling	389	0.429	0.808	3.0133e-07	0.03		0.667	3	0	2018	2018
Non-alcoholic Fatty Liver Disease	C0400966	BMS1	9790	Q14692	BMS1 ribosome biogenesis factor		192	0.499	0.846	0.0001753	0.03		1	3	0	2018	2020
Non-alcoholic Fatty Liver Disease	C0400966	NR1I3	9970	Q14994	nuclear receptor subfamily 1 group I member 3	Nuclear receptor	318	0.448	0.846	3.5259e-08	0.03		1	3	0	2016	2018
Non-alcoholic Fatty Liver Disease	C0400966	FAS-AS1	100302740		FAS antisense RNA 1		29	0.695	0.538		0.02		1	2	0	2017	2017
Non-alcoholic Fatty Liver Disease	C0400966	LINC01672	100505887		long intergenic non-protein coding RNA 1672		268	0.462	0.846		0.02		1	2	0	2017	2018
Non-alcoholic Fatty Liver Disease	C0400966	PSC	100653366		Cholangitis, primary sclerosing		67	0.603	0.731		0.02		1	2	0	2015	2018
Non-alcoholic Fatty Liver Disease	C0400966	TLR6	10333	Q9Y2C9	toll like receptor 6		106	0.556	0.769	2.2508e-05	0.02		1	2	0	2015	2016
Non-alcoholic Fatty Liver Disease	C0400966	YAP1	10413	P46937	Yes associated protein 1	Enzyme modulator	374	0.432	0.808	0.99918	0.02		1	2	0	2015	2019
Non-alcoholic Fatty Liver Disease	C0400966	POSTN	10631	Q15063	periostin	Signaling	378	0.428	0.885	1.0666e-09	0.02		1	2	0	2018	2019
Non-alcoholic Fatty Liver Disease	C0400966	CES1	1066	P23141	carboxylesterase 1	Enzyme	80	0.59	0.692	3.3228e-15	0.02		1	2	0	2018	2019
Non-alcoholic Fatty Liver Disease	C0400966	CORIN	10699	Q9Y5Q5	corin, serine peptidase		55	0.695	0.538	6.5072e-35	0.02		1	2	0	2016	2017
Non-alcoholic Fatty Liver Disease	C0400966	CCL27	10850	Q9Y4X3	C-C motif chemokine ligand 27	Signaling	185	0.502	0.846	0.013511	0.02		1	2	0	2015	2018
Non-alcoholic Fatty Liver Disease	C0400966	MTMR11	10903	A4FU01	myotubularin related protein 11	Enzyme	32	0.691	0.538	4.7707e-23	0.02		1	2	0	2018	2019
Non-alcoholic Fatty Liver Disease	C0400966	CHIT1	1118	Q13231	chitinase 1		142	0.525	0.692	7.1716e-16	0.02		1	2	0	2006	2006
Non-alcoholic Fatty Liver Disease	C0400966	ECD	11319	O95905	ecdysoneless cell cycle regulator		40	0.656	0.538	2.3368e-12	0.02		1	2	0	2011	2019
Non-alcoholic Fatty Liver Disease	C0400966	C1QTNF1	114897	Q9BXJ1	C1q and TNF related 1		27	0.7	0.346	0.00042421	0.02		1	2	0	2017	2019
Non-alcoholic Fatty Liver Disease	C0400966	LYPLAL1	127018	Q5VWZ2	lysophospholipase like 1		8	0.821	0.192	2.6427e-05	0.02		1	2	1	2014	2019
Non-alcoholic Fatty Liver Disease	C0400966	BHLHE23	128408	Q8NDY6	basic helix-loop-helix family member e23	Enzyme	22	0.722	0.385	0.19596	0.02		1	2	0	2018	2019
Non-alcoholic Fatty Liver Disease	C0400966	MAP3K8	1326	P41279	mitogen-activated protein kinase kinase kinase 8	Kinase	168	0.516	0.846	0.96825	0.02		1	2	0	2015	2019
Non-alcoholic Fatty Liver Disease	C0400966	COX8A	1351	P10176	cytochrome c oxidase subunit 8A	Enzyme	526	0.4	0.846	0.11606	0.02		1	2	0	2017	2018
Non-alcoholic Fatty Liver Disease	C0400966	GPR119	139760	Q8TDV5	G protein-coupled receptor 119	G-protein coupled receptor	27	0.695	0.346	0.0086183	0.02		1	2	0	2016	2018
Non-alcoholic Fatty Liver Disease	C0400966	CYBA	1535	P13498	cytochrome b-245 alpha chain		177	0.52	0.769	8.8678e-06	0.02		1	2	0	2018	2018
Non-alcoholic Fatty Liver Disease	C0400966	CYP1A1	1543	P04798	cytochrome P450 family 1 subfamily A member 1	Enzyme	379	0.436	0.846	1.0635e-17	0.02		1	2	0	2018	2019
Non-alcoholic Fatty Liver Disease	C0400966	GRK2	156	P25098	G protein-coupled receptor kinase 2	Kinase	159	0.532	0.654	0.99998	0.02		1	2	0	2018	2019
Non-alcoholic Fatty Liver Disease	C0400966	CYP2D6	1565	P10635	cytochrome P450 family 2 subfamily D member 6		432	0.437	0.885	1.0793e-25	0.02		1	2	0	2016	2019
Non-alcoholic Fatty Liver Disease	C0400966	ATN1	1822	P54259	atrophin 1		499	0.409	0.885	0.99992	0.02		1	2	0	2013	2017
Non-alcoholic Fatty Liver Disease	C0400966	MLKL	197259	Q8NB16	mixed lineage kinase domain like pseudokinase	Kinase	93	0.57	0.731	2.0931e-14	0.02		1	2	0	2019	2020
Non-alcoholic Fatty Liver Disease	C0400966	ELANE	1991	P08246	elastase, neutrophil expressed	Enzyme	346	0.447	0.846	0.0012274	0.02		1	2	0	2016	2019
Non-alcoholic Fatty Liver Disease	C0400966	ELAVL2	1993	Q12926	ELAV like RNA binding protein 2		199	0.486	0.808	0.99514	0.02		1	2	0	2017	2018
Non-alcoholic Fatty Liver Disease	C0400966	ESR1	2099	P03372	estrogen receptor 1	Nuclear receptor	1101	0.324	0.962	0.9992	0.02		1	2	0	2017	2017
Non-alcoholic Fatty Liver Disease	C0400966	ESRRA	2101	P11474	estrogen related receptor alpha	Nuclear receptor	112	0.548	0.654	0.59696	0.02		1	2	0	2013	2018
Non-alcoholic Fatty Liver Disease	C0400966	ACSL4	2182	O60488	acyl-CoA synthetase long chain family member 4	Enzyme	136	0.561	0.769	0.98103	0.02		1	2	0	2007	2018
Non-alcoholic Fatty Liver Disease	C0400966	FAT1	2195	Q14517	FAT atypical cadherin 1		178	0.508	0.808	1.1969e-12	0.02		1	2	0	2011	2017
Non-alcoholic Fatty Liver Disease	C0400966	FCGR2B	2213	P31994	Fc fragment of IgG receptor IIb	Cell adhesion	155	0.522	0.846	0.45637	0.02		1	2	0	2018	2019
Non-alcoholic Fatty Liver Disease	C0400966	SIRT2	22933	Q8IXJ6	sirtuin 2	Epigenetic regulator	172	0.51	0.769	2.3295e-08	0.02		1	2	0	2018	2019
Non-alcoholic Fatty Liver Disease	C0400966	FOXO3	2309	O43524	forkhead box O3		381	0.431	0.808	0.98806	0.02		1	2	0	2017	2019
Non-alcoholic Fatty Liver Disease	C0400966	LPIN1	23175	Q14693	lipin 1		86	0.601	0.692	6.4522e-13	0.02		1	2	1	2012	2019
Non-alcoholic Fatty Liver Disease	C0400966	MLYCD	23417	O95822	malonyl-CoA decarboxylase		79	0.617	0.769	0.00064816	0.02		1	2	0	2018	2018
Non-alcoholic Fatty Liver Disease	C0400966	FOS	2353	P01100	Fos proto-oncogene, AP-1 transcription factor subunit	Transcription factor	528	0.411	0.885	0.26176	0.02		1	2	0	2014	2019
Non-alcoholic Fatty Liver Disease	C0400966	ALOX12	239	P18054	arachidonate 12-lipoxygenase, 12S type	Enzyme	119	0.558	0.692	1.4397e-15	0.02		1	2	0	2017	2019
Non-alcoholic Fatty Liver Disease	C0400966	ALOX5	240	P09917	arachidonate 5-lipoxygenase	Enzyme	342	0.447	0.885	1.2059e-06	0.02		1	2	0	2011	2017
Non-alcoholic Fatty Liver Disease	C0400966	ALOX15	246	P16050	arachidonate 15-lipoxygenase	Enzyme	205	0.502	0.846	1.1397e-23	0.02		1	2	0	2011	2017
Non-alcoholic Fatty Liver Disease	C0400966	ALPP	250	P05187	alkaline phosphatase, placental	Enzyme	209	0.487	0.808	1.8144e-13	0.02		1	2	0	2015	2018
Non-alcoholic Fatty Liver Disease	C0400966	FNDC5	252995	Q8NAU1	fibronectin type III domain containing 5		61	0.631	0.538	0.5458	0.02		1	2	1	2017	2019
Non-alcoholic Fatty Liver Disease	C0400966	ATRNL1	26033	Q5VV63	attractin like 1	Enzyme modulator	117	0.546	0.769	0.99915	0.02		1	2	0	2015	2018
Non-alcoholic Fatty Liver Disease	C0400966	GC	2638	P02774	GC vitamin D binding protein	Transporter	219	0.489	0.885	2.7301e-11	0.02		1	2	0	2013	2019
Non-alcoholic Fatty Liver Disease	C0400966	GCGR	2642	P47871	glucagon receptor	G-protein coupled receptor	47	0.656	0.308	2.2154e-06	0.02		1	2	0	2018	2019
Non-alcoholic Fatty Liver Disease	C0400966	PDLIM3	27295	Q53GG5	PDZ and LIM domain 3	Cellular structure	118	0.547	0.769	3.032e-07	0.02		1	2	0	2015	2018
Non-alcoholic Fatty Liver Disease	C0400966	GLUL	2752	P15104	glutamate-ammonia ligase	Enzyme	200	0.513	0.731	0.9957	0.02		1	2	0	2017	2017
Non-alcoholic Fatty Liver Disease	C0400966	SLC13A5	284111	Q86YT5	solute carrier family 13 member 5	Transporter	106	0.608	0.577	0.00050598	0.02		1	2	0	2017	2017
Non-alcoholic Fatty Liver Disease	C0400966	GRN	2896	P28799	granulin precursor		412	0.435	0.846	0.069666	0.02		0.5	2	0	2017	2018
Non-alcoholic Fatty Liver Disease	C0400966	SETD2	29072	Q9BYW2	SET domain containing 2, histone lysine methyltransferase	Epigenetic regulator	447	0.424	0.846	1	0.02		1	2	0	2018	2019
Non-alcoholic Fatty Liver Disease	C0400966	NR3C1	2908	P04150	nuclear receptor subfamily 3 group C member 1	Nuclear receptor	590	0.393	0.885	0.96958	0.02		1	2	0	2018	2018
Non-alcoholic Fatty Liver Disease	C0400966	TBK1	29110	Q9UHD2	TANK binding kinase 1	Kinase	207	0.513	0.846	0.075174	0.02		1	2	0	2017	2020
Non-alcoholic Fatty Liver Disease	C0400966	PDIA3	2923	P30101	protein disulfide isomerase family A member 3		100	0.566	0.769	0.99608	0.02		1	2	0	2010	2015
Non-alcoholic Fatty Liver Disease	C0400966	FOXA1	3169	P55317	forkhead box A1	Transcription factor	138	0.522	0.731	0.22227	0.02		1	2	0	2012	2013
Non-alcoholic Fatty Liver Disease	C0400966	ACACB	32	O00763	acetyl-CoA carboxylase beta		49	0.644	0.654	7.6499e-47	0.02		1	2	0	2005	2018
Non-alcoholic Fatty Liver Disease	C0400966	HSPA1A	3303	P0DMV8;P0DMV9	heat shock protein family A (Hsp70) member 1A		229	0.486	0.769	0.030228	0.02		1	2	0	2018	2018
Non-alcoholic Fatty Liver Disease	C0400966	HSPA1B	3304	P0DMV8;P0DMV9	heat shock protein family A (Hsp70) member 1B		251	0.474	0.808	0.0053464	0.02		1	2	0	2018	2018
Non-alcoholic Fatty Liver Disease	C0400966	HSP90AA1	3320	P07900	heat shock protein 90 alpha family class A member 1	Chaperone	455	0.411	0.923	0.86025	0.02		1	2	0	2018	2019
Non-alcoholic Fatty Liver Disease	C0400966	FFAR4	338557	Q5NUL3	free fatty acid receptor 4		67	0.621	0.577	1.3634e-05	0.02		1	2	0	2014	2019
Non-alcoholic Fatty Liver Disease	C0400966	IDH2	3418	P48735	isocitrate dehydrogenase (NADP(+)) 2		380	0.434	0.808	0.88271	0.02		1	2	0	2017	2018
Non-alcoholic Fatty Liver Disease	C0400966	IRGM	345611	A1A4Y4	immunity related GTPase M		57	0.617	0.538		0.02		1	2	1	2018	2019
Non-alcoholic Fatty Liver Disease	C0400966	IGFALS	3483	P35858	insulin like growth factor binding protein acid labile subunit	Receptor	203	0.511	0.846	5.4379e-11	0.02		1	2	0	2017	2017
Non-alcoholic Fatty Liver Disease	C0400966	CXCL8	3576	P10145	C-X-C motif chemokine ligand 8	Signaling	1254	0.31	0.962	0.00027377	0.02		1	2	0	2017	2019
Non-alcoholic Fatty Liver Disease	C0400966	INS	3630	P01308	insulin		405	0.445	0.923	0.30091	0.02		1	2	0	2017	2019
Non-alcoholic Fatty Liver Disease	C0400966	AQP9	366	O43315	aquaporin 9	Ion channel	100	0.565	0.808	0.24027	0.02		1	2	0	2013	2019
Non-alcoholic Fatty Liver Disease	C0400966	AR	367	P10275	androgen receptor	Nuclear receptor	854	0.351	0.846	0.98837	0.02		1	2	0	2019	2019
Non-alcoholic Fatty Liver Disease	C0400966	ENHO	375704	Q6UWT2	energy homeostasis associated		71	0.599	0.769	0.10526	0.02		1	2	0	2019	2020
Non-alcoholic Fatty Liver Disease	C0400966	LCN2	3934	P80188	lipocalin 2	Enzyme	497	0.405	0.885	1.1404e-09	0.02		1	2	0	2013	2014
Non-alcoholic Fatty Liver Disease	C0400966	LECT2	3950	O14960	leukocyte cell derived chemotaxin 2	Signaling	47	0.653	0.5	0.0014806	0.02		1	2	0	2015	2017
Non-alcoholic Fatty Liver Disease	C0400966	MIR126	406913		microRNA 126		305	0.447	0.846		0.02		1	2	0	2017	2019
Non-alcoholic Fatty Liver Disease	C0400966	MIR149	406941		microRNA 149		140	0.524	0.769		0.02		1	2	0	2016	2017
Non-alcoholic Fatty Liver Disease	C0400966	MIR20A	406982		microRNA 20a		180	0.498	0.769		0.02		1	2	0	2018	2019
Non-alcoholic Fatty Liver Disease	C0400966	MIR200C	406985		microRNA 200c		202	0.486	0.846		0.02		1	2	0	2016	2018
Non-alcoholic Fatty Liver Disease	C0400966	MIR222	407007		microRNA 222		210	0.486	0.808		0.02		1	2	0	2019	2019
Non-alcoholic Fatty Liver Disease	C0400966	MAS1	4142	P04201	MAS1 proto-oncogene, G protein-coupled receptor	G-protein coupled receptor	142	0.533	0.769	8.2518e-05	0.02		1	2	0	2017	2019
Non-alcoholic Fatty Liver Disease	C0400966	MC4R	4160	P32245	melanocortin 4 receptor	G-protein coupled receptor	149	0.535	0.692	0.00091697	0.02		1	2	0	2014	2019
Non-alcoholic Fatty Liver Disease	C0400966	MMP13	4322	P45452	matrix metallopeptidase 13	Enzyme	328	0.452	0.923	7.8767e-18	0.02		1	2	0	2015	2017
Non-alcoholic Fatty Liver Disease	C0400966	PLIN5	440503	Q00G26	perilipin 5		27	0.695	0.346	1.0481e-11	0.02		1	2	0	2016	2019
Non-alcoholic Fatty Liver Disease	C0400966	MUC1	4582	P15941	mucin 1, cell surface associated		594	0.384	0.885	0.018774	0.02		1	2	0	2018	2018
Non-alcoholic Fatty Liver Disease	C0400966	ATF3	467	P18847	activating transcription factor 3	Transcription factor	228	0.494	0.885	0.089296	0.02		1	2	0	2017	2019
Non-alcoholic Fatty Liver Disease	C0400966	ATHS	470		atherosclerosis susceptibility (lipoprotein associated)		112	0.551	0.769		0.02		1	2	0	2015	2018
Non-alcoholic Fatty Liver Disease	C0400966	CCN3	4856	P48745	cellular communication network factor 3	Signaling	117	0.554	0.615	0.0066442	0.02		1	2	0	2018	2018
Non-alcoholic Fatty Liver Disease	C0400966	MIR375	494324		microRNA 375		226	0.476	0.769		0.02		1	2	0	2016	2018
Non-alcoholic Fatty Liver Disease	C0400966	TNFRSF11B	4982	O00300	TNF receptor superfamily member 11b		443	0.422	0.808	0.16171	0.02		1	2	0	2018	2019
Non-alcoholic Fatty Liver Disease	C0400966	IL22	50616	Q9GZX6	interleukin 22		551	0.393	0.885	0.00018843	0.02		1	2	0	2018	2019
Non-alcoholic Fatty Liver Disease	C0400966	ACOX1	51	Q15067	acyl-CoA oxidase 1	Enzyme	95	0.61	0.731	0.062095	0.02		1	2	0	2018	2018
Non-alcoholic Fatty Liver Disease	C0400966	ADIPOR1	51094	Q96A54	adiponectin receptor 1	Receptor	148	0.529	0.808	0.6584	0.02		1	2	0	2019	2020
Non-alcoholic Fatty Liver Disease	C0400966	CRNKL1	51340	Q9BZJ0	crooked neck pre-mRNA splicing factor 1	Nucleic acid binding	24	0.711	0.385	2.7151e-06	0.02		1	2	0	2016	2017
Non-alcoholic Fatty Liver Disease	C0400966	HSD17B7	51478	P56937	hydroxysteroid 17-beta dehydrogenase 7		81	0.582	0.5	6.6475e-06	0.02		1	2	0	2019	2019
Non-alcoholic Fatty Liver Disease	C0400966	GDE1	51573	Q9NZC3	glycerophosphodiester phosphodiesterase 1		228	0.481	0.808	6.1163e-06	0.02		1	2	0	2011	2016
Non-alcoholic Fatty Liver Disease	C0400966	ENPP1	5167	P22413	ectonucleotide pyrophosphatase/phosphodiesterase 1	Enzyme	247	0.498	0.808	4.9944e-08	0.02		1	2	1	2010	2019
Non-alcoholic Fatty Liver Disease	C0400966	LUC7L3	51747	O95232	LUC7 like 3 pre-mRNA splicing factor		26	0.691	0.5	0.99999	0.02		1	2	0	2018	2019
Non-alcoholic Fatty Liver Disease	C0400966	FAM3B	54097	P58499	FAM3 metabolism regulating signaling molecule B		38	0.682	0.385	2.4285e-08	0.02		1	2	0	2013	2018
Non-alcoholic Fatty Liver Disease	C0400966	UGT1A1	54658	P22309	UDP glucuronosyltransferase family 1 member A1		302	0.464	0.769	3.2577e-06	0.02		1	2	0	2009	2017
Non-alcoholic Fatty Liver Disease	C0400966	ELOVL2	54898	Q9NXB9	ELOVL fatty acid elongase 2	Enzyme	26	0.722	0.423	8.3719e-10	0.02		1	2	1	2017	2019
Non-alcoholic Fatty Liver Disease	C0400966	AVP	551	P01185	arginine vasopressin	Signaling	454	0.437	0.846	0.074413	0.02		1	2	0	2019	2019
Non-alcoholic Fatty Liver Disease	C0400966	NAT10	55226	Q9H0A0	N-acetyltransferase 10		133	0.536	0.769	4.1206e-22	0.02		1	2	0	2015	2018
Non-alcoholic Fatty Liver Disease	C0400966	PTPA	5524	Q15257	protein phosphatase 2 phosphatase activator	Enzyme modulator	245	0.48	0.846	0.99057	0.02		1	2	0	2019	2019
Non-alcoholic Fatty Liver Disease	C0400966	MEG3	55384		maternally expressed 3		239	0.471	0.846		0.02		1	2	0	2018	2019
Non-alcoholic Fatty Liver Disease	C0400966	MAPK1	5594	P28482	mitogen-activated protein kinase 1	Kinase	1059	0.33	0.923	0.99698	0.02		1	2	0	2018	2019
Non-alcoholic Fatty Liver Disease	C0400966	MYDGF	56005	Q969H8	myeloid derived growth factor		295	0.451	0.846	3.4923e-06	0.02		1	2	0	2018	2019
Non-alcoholic Fatty Liver Disease	C0400966	AZGP1	563	P25311	alpha-2-glycoprotein 1, zinc-binding		101	0.566	0.769	4.1545e-06	0.02		1	2	0	2018	2019
Non-alcoholic Fatty Liver Disease	C0400966	PRTN3	5657	P24158	proteinase 3	Enzyme	215	0.503	0.808	3.8044e-05	0.02		1	2	0	2016	2019
Non-alcoholic Fatty Liver Disease	C0400966	PTGS1	5742	P23219	prostaglandin-endoperoxide synthase 1	Enzyme	318	0.46	0.885	6.2425e-07	0.02		1	2	0	2017	2018
Non-alcoholic Fatty Liver Disease	C0400966	MIR146B	574447		microRNA 146b		187	0.496	0.769		0.02		1	2	0	2018	2019
Non-alcoholic Fatty Liver Disease	C0400966	PTPN1	5770	P18031	protein tyrosine phosphatase non-receptor type 1		169	0.523	0.731	0.81293	0.02		1	2	0	2016	2018
Non-alcoholic Fatty Liver Disease	C0400966	NLRC4	58484	Q9NPP4	NLR family CARD domain containing 4		145	0.556	0.769	9.8714e-12	0.02		1	2	0	2019	2019
Non-alcoholic Fatty Liver Disease	C0400966	BCAT1	586	P54687	branched chain amino acid transaminase 1	Enzyme	62	0.606	0.538	3.7984e-08	0.02		1	2	0	2018	2019
Non-alcoholic Fatty Liver Disease	C0400966	MOK	5891	Q9UQ07	MOK protein kinase	Kinase	251	0.476	0.769	8.8397e-22	0.02		1	2	0	2017	2018
Non-alcoholic Fatty Liver Disease	C0400966	FAM3A	60343	P98173	FAM3 metabolism regulating signaling molecule A		8	0.805	0.269	0.66899	0.02		1	2	0	2017	2018
Non-alcoholic Fatty Liver Disease	C0400966	ROCK1	6093	Q13464	Rho associated coiled-coil containing protein kinase 1	Kinase	157	0.513	0.731	1	0.02		1	2	0	2018	2019
Non-alcoholic Fatty Liver Disease	C0400966	HCC	619501		thyroid carcinoma, Hurthle cell		45	0.644	0.423		0.02		1	2	0	2018	2018
Non-alcoholic Fatty Liver Disease	C0400966	S100A8	6279	P05109	S100 calcium binding protein A8	Calcium-binding protein	369	0.43	0.962	0.13761	0.02		0.5	2	0	2016	2018
Non-alcoholic Fatty Liver Disease	C0400966	CEACAM1	634	P13688	CEA cell adhesion molecule 1		167	0.525	0.731	0.00078816	0.02		1	2	0	2017	2018
Non-alcoholic Fatty Liver Disease	C0400966	SCP2	6342	P22307	sterol carrier protein 2		50	0.644	0.5	8.7451e-07	0.02		1	2	0	2017	2018
Non-alcoholic Fatty Liver Disease	C0400966	CCL20	6364	P78556	C-C motif chemokine ligand 20	Signaling	242	0.474	0.846	0.00024242	0.02		1	2	0	2018	2019
Non-alcoholic Fatty Liver Disease	C0400966	SELPLG	6404	Q14242	selectin P ligand		113	0.564	0.692	0.1768	0.02		1	2	0	2015	2017
Non-alcoholic Fatty Liver Disease	C0400966	ABCG5	64240	Q9H222	ATP binding cassette subfamily G member 5	Transporter	108	0.592	0.577	3.081e-21	0.02		1	2	0	2009	2018
Non-alcoholic Fatty Liver Disease	C0400966	IL25	64806	Q9H293	interleukin 25		139	0.529	0.846	0.00092347	0.02		1	2	0	2018	2019
Non-alcoholic Fatty Liver Disease	C0400966	SLC2A1	6513	P11166	solute carrier family 2 member 1	Transporter	687	0.388	0.808	0.9941	0.02		1	2	0	2013	2018
Non-alcoholic Fatty Liver Disease	C0400966	SLC2A2	6514	P11168	solute carrier family 2 member 2	Transporter	123	0.572	0.692	3.4337e-08	0.02		1	2	0	2013	2019
Non-alcoholic Fatty Liver Disease	C0400966	NCF1	653361	P14598	neutrophil cytosolic factor 1		170	0.521	0.808	2.8311e-05	0.02		1	2	0	2018	2018
Non-alcoholic Fatty Liver Disease	C0400966	SLPI	6590	P03973	secretory leukocyte peptidase inhibitor	Enzyme modulator	310	0.449	0.846	0.00089665	0.02		1	2	0	2015	2018
Non-alcoholic Fatty Liver Disease	C0400966	SPARC	6678	P09486	secreted protein acidic and cysteine rich	Signaling	344	0.445	0.846	0.89148	0.02		1	2	0	2018	2019
Non-alcoholic Fatty Liver Disease	C0400966	SPINK1	6690	P00995	serine peptidase inhibitor Kazal type 1		216	0.492	0.808	0.31476	0.02		1	2	1	2008	2009
Non-alcoholic Fatty Liver Disease	C0400966	SPTBN1	6711	Q01082	spectrin beta, non-erythrocytic 1		76	0.619	0.538	1	0.02		1	2	0	2017	2018
Non-alcoholic Fatty Liver Disease	C0400966	STAT5A	6776	P42229	signal transducer and activator of transcription 5A	Nucleic acid binding	318	0.445	0.808	0.99994	0.02		1	2	0	2019	2019
Non-alcoholic Fatty Liver Disease	C0400966	STAT5B	6777	P51692	signal transducer and activator of transcription 5B	Nucleic acid binding	357	0.442	0.808	0.99988	0.02		1	2	0	2019	2019
Non-alcoholic Fatty Liver Disease	C0400966	TEK	7010	Q02763	TEK receptor tyrosine kinase	Kinase	300	0.462	0.692	1	0.02		1	2	0	2015	2019
Non-alcoholic Fatty Liver Disease	C0400966	TRPV1	7442	Q8NER1	transient receptor potential cation channel subfamily V member 1	Ion channel	404	0.446	0.885	1.0103e-16	0.02		1	2	0	2012	2013
Non-alcoholic Fatty Liver Disease	C0400966	DHRS11	79154	Q6UWP2	dehydrogenase/reductase 11	Enzyme	43	0.653	0.423	2.2434e-06	0.02		1	2	0	2019	2019
Non-alcoholic Fatty Liver Disease	C0400966	STEAP4	79689	Q687X5	STEAP4 metalloreductase		34	0.686	0.462	1.1959e-07	0.02		1	2	0	2015	2018
Non-alcoholic Fatty Liver Disease	C0400966	CALCR	799	P30988	calcitonin receptor	G-protein coupled receptor	282	0.464	0.846	3.1176e-09	0.02		1	2	0	2018	2018
Non-alcoholic Fatty Liver Disease	C0400966	ASRGL1	80150	Q7L266	asparaginase and isoaspartyl peptidase 1	Enzyme	205	0.494	0.808	2.7632e-05	0.02		1	2	0	2015	2018
Non-alcoholic Fatty Liver Disease	C0400966	CASP3	836	P42574	caspase 3	Enzyme	819	0.351	0.923	0.10017	0.02		1	2	0	2017	2019
Non-alcoholic Fatty Liver Disease	C0400966	CASP8	841	Q14790	caspase 8	Enzyme	480	0.404	0.923	3.7236e-06	0.02		1	2	0	2014	2019
Non-alcoholic Fatty Liver Disease	C0400966	ORAI1	84876	Q96D31	ORAI calcium release-activated calcium modulator 1	Ion channel	195	0.52	0.808	1.9068e-05	0.02		1	2	0	2019	2019
Non-alcoholic Fatty Liver Disease	C0400966	TNFSF11	8600	O14788	TNF superfamily member 11	Signaling	327	0.453	0.846	0.0049159	0.02		1	2	0	2018	2019
Non-alcoholic Fatty Liver Disease	C0400966	SOCS1	8651	O15524	suppressor of cytokine signaling 1	Enzyme modulator	315	0.445	0.808	0.58544	0.02		1	2	0	2019	2019
Non-alcoholic Fatty Liver Disease	C0400966	CBR1	873	P16152	carbonyl reductase 1		100	0.572	0.654	6.2783e-05	0.02		1	2	0	2016	2017
Non-alcoholic Fatty Liver Disease	C0400966	RIPK1	8737	Q13546	receptor interacting serine/threonine kinase 1	Kinase	250	0.479	0.769	0.0079441	0.02		1	2	0	2018	2020
Non-alcoholic Fatty Liver Disease	C0400966	CCN4	8840	O95388	cellular communication network factor 4	Signaling	114	0.554	0.692	6.3885e-07	0.02		1	2	0	2018	2018
Non-alcoholic Fatty Liver Disease	C0400966	APLN	8862	Q9ULZ1	apelin		226	0.497	0.769	0.45897	0.02		1	2	0	2017	2019
Non-alcoholic Fatty Liver Disease	C0400966	SELENBP1	8991	Q13228	selenium binding protein 1	Immune response	214	0.493	0.846	3.2268e-16	0.02		1	2	0	2019	2019
Non-alcoholic Fatty Liver Disease	C0400966	SOCS3	9021	O14543	suppressor of cytokine signaling 3	Enzyme modulator	375	0.434	0.808	0.74613	0.02		1	2	0	2018	2019
Non-alcoholic Fatty Liver Disease	C0400966	USP10	9100	Q14694	ubiquitin specific peptidase 10	Enzyme	40	0.663	0.462	0.99411	0.02		1	2	0	2018	2019
Non-alcoholic Fatty Liver Disease	C0400966	CD5L	922	O43866	CD5 molecule like	Enzyme	78	0.593	0.846	4.2297e-17	0.02		1	2	0	2018	2019
Non-alcoholic Fatty Liver Disease	C0400966	CD163	9332	Q86VB7	CD163 molecule	Enzyme	369	0.427	0.846	0.0008338	0.02		1	2	0	2017	2018
Non-alcoholic Fatty Liver Disease	C0400966	PPIG	9360	Q13427	peptidylprolyl isomerase G		203	0.497	0.846	0.96292	0.02		1	2	0	2015	2016
Non-alcoholic Fatty Liver Disease	C0400966	CD68	968	P34810	CD68 molecule	Transporter	452	0.408	0.808	1.4063e-06	0.02		1	2	0	2017	2019
Non-alcoholic Fatty Liver Disease	C0400966	MIR873	100126316		microRNA 873		67	0.601	0.538		0.01		1	1	0	2019	2019
Non-alcoholic Fatty Liver Disease	C0400966	MIR190B	100126346		microRNA 190b		22	0.722	0.385		0.01		1	1	0	2018	2018
Non-alcoholic Fatty Liver Disease	C0400966	CD24	100133941	P25063	CD24 molecule		244	0.472	0.769		0.01		0	1	0	2018	2018
Non-alcoholic Fatty Liver Disease	C0400966	MIR1224	100187716		microRNA 1224		36	0.666	0.385		0.01		1	1	0	2018	2018
Non-alcoholic Fatty Liver Disease	C0400966	PARP2	10038	Q9UGN5	poly(ADP-ribose) polymerase 2		40	0.663	0.538	2.3289e-13	0.01		1	1	0	2017	2017
Non-alcoholic Fatty Liver Disease	C0400966	LOC100505909	100505909		histidine-rich glycoprotein		17	0.722	0.385		0.01		1	1	0	2018	2018
Non-alcoholic Fatty Liver Disease	C0400966	OCLN	100506658	Q16625	occludin		195	0.507	0.846	8.5583e-07	0.01		1	1	0	2019	2019
Non-alcoholic Fatty Liver Disease	C0400966	DNM1L	10059	O00429	dynamin 1 like	Enzyme modulator	273	0.475	0.808	0.00056753	0.01		1	1	0	2018	2018
Non-alcoholic Fatty Liver Disease	C0400966	ERVK-2	100616100		endogenous retrovirus group K member 2		37	0.674	0.423		0.01		1	1	0	2019	2019
Non-alcoholic Fatty Liver Disease	C0400966	PARTICL	100630918		promoter of MAT2A antisense radiation-induced circulating long non-coding RNA		9	0.792	0.269		0.01		1	1	0	2018	2018
Non-alcoholic Fatty Liver Disease	C0400966	PPIF	10105	P30405	peptidylprolyl isomerase F		78	0.593	0.692	0.0019919	0.01		1	1	0	2019	2019
Non-alcoholic Fatty Liver Disease	C0400966	IFNL4	101180976	K9M1U5	interferon lambda 4 (gene/pseudogene)		39	0.67	0.577		0.01		1	1	2	2017	2017
Non-alcoholic Fatty Liver Disease	C0400966	LRPPRC	10128	P42704	leucine rich pentatricopeptide repeat containing		220	0.493	0.769	2.3019e-10	0.01		1	1	0	2015	2015
Non-alcoholic Fatty Liver Disease	C0400966	SLC25A13	10165	Q9UJS0	solute carrier family 25 member 13	Transporter	109	0.617	0.5	1.2833e-24	0.01		1	1	0	2008	2008
Non-alcoholic Fatty Liver Disease	C0400966	CDK4	1019	P11802	cyclin dependent kinase 4	Kinase	433	0.412	0.808	0.062909	0.01		1	1	0	2018	2018
Non-alcoholic Fatty Liver Disease	C0400966	B4GALT1-AS1	101929639		B4GALT1 antisense RNA 1		13	0.792	0.192		0.01		1	1	0	2018	2018
Non-alcoholic Fatty Liver Disease	C0400966	PRMT3	10196	O60678	protein arginine methyltransferase 3	Epigenetic regulator	17	0.743	0.423	4.9032e-25	0.01		1	1	0	2015	2015
Non-alcoholic Fatty Liver Disease	C0400966	PLIN3	10226	O60664	perilipin 3	Transporter	14	0.736	0.423	1.179e-07	0.01		1	1	0	2019	2019
Non-alcoholic Fatty Liver Disease	C0400966	CDK8	1024	P49336	cyclin dependent kinase 8	Kinase	82	0.597	0.654	0.40964	0.01		1	1	0	2015	2015
Non-alcoholic Fatty Liver Disease	C0400966	FSTL3	10272	O95633	follistatin like 3	Enzyme modulator	33	0.695	0.423	0.68658	0.01		1	1	0	2020	2020
Non-alcoholic Fatty Liver Disease	C0400966	CDKN2A	1029	P42771;Q8N726	cyclin dependent kinase inhibitor 2A		1314	0.3	0.885	0.39474	0.01		1	1	0	2020	2020
Non-alcoholic Fatty Liver Disease	C0400966	ZNF267	10308	Q14586	zinc finger protein 267		15	0.769	0.192	0.017108	0.01		1	1	0	2011	2011
Non-alcoholic Fatty Liver Disease	C0400966	AKR1A1	10327	P14550	aldo-keto reductase family 1 member A1	Enzyme	185	0.51	0.846	6.6621e-07	0.01		1	1	0	2018	2018
Non-alcoholic Fatty Liver Disease	C0400966	MERTK	10461	Q12866	MER proto-oncogene, tyrosine kinase	Kinase	154	0.531	0.692	2.6593e-11	0.01		1	1	1	2017	2017
Non-alcoholic Fatty Liver Disease	C0400966	CAP1	10487	Q01518	cyclase associated actin cytoskeleton regulatory protein 1	Cellular structure	149	0.529	0.808	0.019817	0.01		1	1	0	2018	2018
Non-alcoholic Fatty Liver Disease	C0400966	STK25	10494	O00506	serine/threonine kinase 25	Kinase	29	0.7	0.346	0.051875	0.01		1	1	0	2018	2018
Non-alcoholic Fatty Liver Disease	C0400966	NCOA2	10499	Q15596	nuclear receptor coactivator 2	Enzyme	95	0.575	0.615	1	0.01		1	1	0	2016	2016
Non-alcoholic Fatty Liver Disease	C0400966	ATG7	10533	O95352	autophagy related 7	Enzyme	179	0.505	0.769	7.3758e-12	0.01		1	1	0	2015	2015
Non-alcoholic Fatty Liver Disease	C0400966	LINC01684	105372751		long intergenic non-protein coding RNA 1684		2	1	0.038		0.01		1	1	1	2017	2017
Non-alcoholic Fatty Liver Disease	C0400966	PRDX4	10549	Q13162	peroxiredoxin 4	Enzyme	59	0.619	0.692	0.026755	0.01		1	1	0	2018	2018
Non-alcoholic Fatty Liver Disease	C0400966	CEL	1056	P19835	carboxyl ester lipase		172	0.514	0.808	1.538e-06	0.01		1	1	0	2016	2016
Non-alcoholic Fatty Liver Disease	C0400966	SORBS1	10580	Q9BX66	sorbin and SH3 domain containing 1		124	0.554	0.769	1.534e-12	0.01		1	1	0	2018	2018
Non-alcoholic Fatty Liver Disease	C0400966	AHSA1	10598	O95433	activator of HSP90 ATPase activity 1		526	0.396	0.923	0.99896	0.01		1	1	0	2019	2019
Non-alcoholic Fatty Liver Disease	C0400966	ERLIN1	10613	O75477	ER lipid raft associated 1		33	0.736	0.308	0.17751	0.01		1	1	0	2013	2013
Non-alcoholic Fatty Liver Disease	C0400966	CAMKK2	10645	Q96RR4	calcium/calmodulin dependent protein kinase kinase 2	Kinase	62	0.617	0.654	0.091625	0.01		1	1	0	2017	2017
Non-alcoholic Fatty Liver Disease	C0400966	CXCR6	10663	O00574	C-X-C motif chemokine receptor 6	G-protein coupled receptor	325	0.448	0.885	5.7212e-05	0.01		1	1	0	2019	2019
Non-alcoholic Fatty Liver Disease	C0400966	SIRT1-AS	106633813		SIRT1 antisense RNA		44	0.67	0.615		0.01		1	1	0	2017	2017
Non-alcoholic Fatty Liver Disease	C0400966	TNFSF13B	10673	Q9Y275	TNF superfamily member 13b		282	0.46	0.731	0.98193	0.01		1	1	0	2019	2019
Non-alcoholic Fatty Liver Disease	C0400966	EBP	10682	Q15125	EBP cholestenol delta-isomerase	Enzyme	243	0.494	0.846	0.93645	0.01		1	1	0	2019	2019
Non-alcoholic Fatty Liver Disease	C0400966	YME1L1	10730	Q96TA2	YME1 like 1 ATPase	Enzyme	60	0.633	0.654	0.028988	0.01		0	1	0	2018	2018
Non-alcoholic Fatty Liver Disease	C0400966	PLK4	10733	O00444	polo like kinase 4	Kinase	135	0.551	0.731	7.0844e-06	0.01		1	1	0	2017	2017
Non-alcoholic Fatty Liver Disease	C0400966	HPSE	10855	Q9Y251	heparanase	Enzyme	393	0.425	0.808	2.266e-14	0.01		1	1	0	2018	2018
Non-alcoholic Fatty Liver Disease	C0400966	PGRMC1	10857	O00264	progesterone receptor membrane component 1	Signaling	79	0.588	0.654	0.6711	0.01		1	1	0	2018	2018
Non-alcoholic Fatty Liver Disease	C0400966	NMU	10874	P48645	neuromedin U		68	0.61	0.808	0.00041549	0.01		1	1	0	2018	2018
Non-alcoholic Fatty Liver Disease	C0400966	TMED2	10959	Q15363	transmembrane p24 trafficking protein 2	Transporter	73	0.61	0.692	0.89231	0.01		1	1	0	2017	2017
Non-alcoholic Fatty Liver Disease	C0400966	SLC27A2	11001	O14975	solute carrier family 27 member 2	Transporter	27	0.7	0.462	6.3647e-09	0.01		1	1	0	2015	2015
Non-alcoholic Fatty Liver Disease	C0400966	LILRB4	11006	Q8NHJ6	leukocyte immunoglobulin like receptor B4	Receptor	46	0.659	0.423	4.7133e-13	0.01		1	1	0	2018	2018
Non-alcoholic Fatty Liver Disease	C0400966	RIPK3	11035	Q9Y572	receptor interacting serine/threonine kinase 3	Kinase	196	0.497	0.885	1.1874e-14	0.01		1	1	0	2018	2018
Non-alcoholic Fatty Liver Disease	C0400966	LOC110806263	110806263		TERT 5' regulatory region		245	0.464	0.731		0.01		1	1	0	2016	2016
Non-alcoholic Fatty Liver Disease	C0400966	ADAMTS13	11093	Q76LX8	ADAM metallopeptidase with thrombospondin type 1 motif 13	Enzyme	229	0.496	0.769	5.1409e-15	0.01		1	1	0	2014	2014
Non-alcoholic Fatty Liver Disease	C0400966	TREH	11181	O43280	trehalase		42	0.67	0.654	8.9579e-15	0.01		1	1	0	2020	2020
Non-alcoholic Fatty Liver Disease	C0400966	LNCARSR	112577459		lncRNA regulator of Akt signaling associated with HCC and RCC		19	0.722	0.269		0.01		1	1	0	2018	2018
Non-alcoholic Fatty Liver Disease	C0400966	DUSP12	11266	Q9UNI6	dual specificity phosphatase 12		17	0.78	0.269	0.00013856	0.01		1	1	0	2019	2019
Non-alcoholic Fatty Liver Disease	C0400966	CHRM3	1131	P20309	cholinergic receptor muscarinic 3	G-protein coupled receptor	284	0.464	0.885	0.99253	0.01		1	1	0	2019	2019
Non-alcoholic Fatty Liver Disease	C0400966	VSIG4	11326	Q9Y279	V-set and immunoglobulin domain containing 4		51	0.628	0.615	1.4953e-09	0.01		1	1	0	2019	2019
Non-alcoholic Fatty Liver Disease	C0400966	MGLL	11343	Q99685	monoglyceride lipase	Enzyme	125	0.564	0.731	0.020016	0.01		1	1	0	2019	2019
Non-alcoholic Fatty Liver Disease	C0400966	TXNRD3	114112	Q86VQ6	thioredoxin reductase 3	Enzyme	37	0.653	0.615	8.3449e-08	0.01		1	1	0	2019	2019
Non-alcoholic Fatty Liver Disease	C0400966	CHUK	1147	O15111	component of inhibitor of nuclear factor kappa B kinase complex	Kinase	125	0.556	0.731	0.99403	0.01		1	1	0	2013	2013
Non-alcoholic Fatty Liver Disease	C0400966	C1QTNF3	114899	Q9BXJ4	C1q and TNF related 3		26	0.695	0.577	1.8089e-07	0.01		1	1	0	2018	2018
Non-alcoholic Fatty Liver Disease	C0400966	CIDEA	1149	O60543	cell death inducing DFFA like effector a		16	0.751	0.269	5.5761e-06	0.01		1	1	0	2019	2019
Non-alcoholic Fatty Liver Disease	C0400966	H3P10	115482713		H3 histone pseudogene 10		769	0.35	0.846		0.01		1	1	0	2020	2020
Non-alcoholic Fatty Liver Disease	C0400966	TWIST2	117581	Q8WVJ9	twist family bHLH transcription factor 2	Transcription factor	198	0.518	0.731	0.56004	0.01		1	1	0	2019	2019
Non-alcoholic Fatty Liver Disease	C0400966	CLCN2	1181	P51788	chloride voltage-gated channel 2	Ion channel	67	0.626	0.462	5.546e-12	0.01		1	1	0	2018	2018
Non-alcoholic Fatty Liver Disease	C0400966	IFTAP	119710	Q86VG3	intraflagellar transport associated protein		2	0.931	0.154	7.605e-06	0.01		1	1	0	2019	2019
Non-alcoholic Fatty Liver Disease	C0400966	CYP2R1	120227	Q6VVX0	cytochrome P450 family 2 subfamily R member 1		139	0.563	0.731	3.793e-10	0.01		1	1	0	2019	2019
Non-alcoholic Fatty Liver Disease	C0400966	CPT1C	126129	Q8TCG5	carnitine palmitoyltransferase 1C	Enzyme	51	0.691	0.5	2.1926e-09	0.01		1	1	0	2018	2018
Non-alcoholic Fatty Liver Disease	C0400966	CNR2	1269	P34972	cannabinoid receptor 2	G-protein coupled receptor	197	0.509	0.846	6.5369e-06	0.01		1	1	0	2007	2007
Non-alcoholic Fatty Liver Disease	C0400966	COL3A1	1281	P02461	collagen type III alpha 1 chain		301	0.477	0.808	1	0.01		1	1	0	2017	2017
Non-alcoholic Fatty Liver Disease	C0400966	SLC31A1	1317	O15431	solute carrier family 31 member 1	Transporter	71	0.612	0.577	0.065398	0.01		1	1	0	2018	2018
Non-alcoholic Fatty Liver Disease	C0400966	ADM	133	P35318	adrenomedullin	Signaling	405	0.436	0.808	0.040831	0.01		0	1	0	2018	2018
Non-alcoholic Fatty Liver Disease	C0400966	PPARGC1B	133522	Q86YN6	PPARG coactivator 1 beta	Transcription factor	102	0.569	0.731	0.50321	0.01		1	1	0	2007	2007
Non-alcoholic Fatty Liver Disease	C0400966	NADK2	133686	Q4G0N4	NAD kinase 2, mitochondrial	Kinase	42	0.691	0.346	0.065215	0.01		1	1	0	2018	2018
Non-alcoholic Fatty Liver Disease	C0400966	CP	1356	P00450	ceruloplasmin	Enzyme	283	0.466	0.846	4.2013e-10	0.01		1	1	0	2008	2008
Non-alcoholic Fatty Liver Disease	C0400966	CPN1	1369	P15169	carboxypeptidase N subunit 1		31	0.729	0.423	8.6973e-08	0.01		1	1	0	2019	2019
Non-alcoholic Fatty Liver Disease	C0400966	CPOX	1371	P36551	coproporphyrinogen oxidase	Enzyme	246	0.488	0.846	0.17152	0.01		1	1	0	2017	2017
Non-alcoholic Fatty Liver Disease	C0400966	CPS1	1373	P31327	carbamoyl-phosphate synthase 1	Enzyme	133	0.59	0.615	1.0947e-09	0.01		1	1	0	2019	2019
Non-alcoholic Fatty Liver Disease	C0400966	CREB1	1385	P16220	cAMP responsive element binding protein 1		294	0.463	0.885	0.99673	0.01		1	1	0	2018	2018
Non-alcoholic Fatty Liver Disease	C0400966	ATF2	1386	P15336	activating transcription factor 2	Transcription factor	122	0.551	0.808	0.99131	0.01		1	1	0	2018	2018
Non-alcoholic Fatty Liver Disease	C0400966	CREBBP	1387	Q92793	CREB binding protein		438	0.428	0.808	1	0.01		1	1	0	2019	2019
Non-alcoholic Fatty Liver Disease	C0400966	CRK	1398	P46108	CRK proto-oncogene, adaptor protein		544	0.394	0.923	0.95936	0.01		1	1	0	2019	2019
Non-alcoholic Fatty Liver Disease	C0400966	CRMP1	1400	Q14194	collapsin response mediator protein 1	Enzyme	148	0.525	0.808	0.99173	0.01		1	1	0	2018	2018
Non-alcoholic Fatty Liver Disease	C0400966	MAPK14	1432	Q16539	mitogen-activated protein kinase 14	Kinase	626	0.379	0.923	0.37466	0.01		1	1	0	2019	2019
Non-alcoholic Fatty Liver Disease	C0400966	FGFBP3	143282	Q8TAT2	fibroblast growth factor binding protein 3		8	0.821	0.154	0.0010279	0.01		1	1	0	2018	2018
Non-alcoholic Fatty Liver Disease	C0400966	CSF3	1440	P09919	colony stimulating factor 3		687	0.377	0.885	0.38046	0.01		1	1	0	2017	2017
Non-alcoholic Fatty Liver Disease	C0400966	CSF3R	1441	Q99062	colony stimulating factor 3 receptor	Signaling	120	0.55	0.692	1.5225e-10	0.01		1	1	0	2017	2017
Non-alcoholic Fatty Liver Disease	C0400966	SLC38A8	146167	A6NNN8	solute carrier family 38 member 8	Transporter	19	0.743	0.269	3.3217e-24	0.01		1	1	0	2013	2013
Non-alcoholic Fatty Liver Disease	C0400966	ZFP90	146198	Q8TF47	ZFP90 zinc finger protein	Transcription factor	13	0.78	0.231	0.031662	0.01		1	1	0	2019	2019
Non-alcoholic Fatty Liver Disease	C0400966	CILP2	148113	Q8IUL8	cartilage intermediate layer protein 2		15	0.76	0.346	8.0314e-08	0.01		1	1	0	2016	2016
Non-alcoholic Fatty Liver Disease	C0400966	CTAA1	1483		cataract, anterior polar 1		106	0.568	0.731		0.01		1	1	0	2018	2018
Non-alcoholic Fatty Liver Disease	C0400966	HJV	148738	Q6ZVN8	hemojuvelin BMP co-receptor		71	0.621	0.654	0.0042363	0.01		1	1	0	2008	2008
Non-alcoholic Fatty Liver Disease	C0400966	CTF1	1489	Q16619	cardiotrophin 1		60	0.636	0.423	0.041899	0.01		1	1	0	2014	2014
Non-alcoholic Fatty Liver Disease	C0400966	CCN2	1490	P29279	cellular communication network factor 2	Signaling	518	0.399	0.846	0.00050202	0.01		1	1	0	2018	2018
Non-alcoholic Fatty Liver Disease	C0400966	PDIK1L	149420	Q8N165	PDLIM1 interacting kinase 1 like	Kinase	138	0.534	0.769	0.26436	0.01		1	1	0	2017	2017
Non-alcoholic Fatty Liver Disease	C0400966	CTNNA1	1495	P35221	catenin alpha 1	Cellular structure	82	0.584	0.538	0.96962	0.01		1	1	0	2017	2017
Non-alcoholic Fatty Liver Disease	C0400966	SIK1	150094	A0A0B4J2F2;P57059	salt inducible kinase 1	Kinase	157	0.544	0.731	0.93716	0.01		1	1	0	2019	2019
Non-alcoholic Fatty Liver Disease	C0400966	HORMAD2	150280	Q8N7B1	HORMA domain containing 2		22	0.716	0.385	7.1353e-05	0.01		0	1	0	2017	2017
Non-alcoholic Fatty Liver Disease	C0400966	CTRL	1506	P40313	chymotrypsin like	Enzyme	76	0.599	0.846	1.0976e-09	0.01		1	1	0	2019	2019
Non-alcoholic Fatty Liver Disease	C0400966	CTSB	1508	P07858	cathepsin B	Enzyme	304	0.457	0.846	5.8819e-11	0.01		1	1	0	2018	2018
Non-alcoholic Fatty Liver Disease	C0400966	CTSD	1509	P07339	cathepsin D	Enzyme	242	0.478	0.846	0.00091747	0.01		1	1	0	2019	2019
Non-alcoholic Fatty Liver Disease	C0400966	CTSG	1511	P08311	cathepsin G	Enzyme	95	0.563	0.731	9.5595e-06	0.01		1	1	0	2016	2016
Non-alcoholic Fatty Liver Disease	C0400966	CTSS	1520	P25774	cathepsin S	Enzyme	131	0.539	0.731	0.34178	0.01		1	1	0	2014	2014
Non-alcoholic Fatty Liver Disease	C0400966	ADRB2	154	P07550	adrenoceptor beta 2	G-protein coupled receptor	387	0.442	0.923	0.52545	0.01		1	1	0	2010	2010
Non-alcoholic Fatty Liver Disease	C0400966	SLC2A12	154091	Q8TD20	solute carrier family 2 member 12	Transporter	26	0.729	0.5	5.551e-05	0.01		1	1	0	2014	2014
Non-alcoholic Fatty Liver Disease	C0400966	CYP2A6	1548	P11509	cytochrome P450 family 2 subfamily A member 6		133	0.556	0.731	5.401e-09	0.01		1	1	0	2019	2019
Non-alcoholic Fatty Liver Disease	C0400966	CYP2B6	1555	P20813	cytochrome P450 family 2 subfamily B member 6		388	0.428	0.846	1.9303e-10	0.01		1	1	0	2016	2016
Non-alcoholic Fatty Liver Disease	C0400966	CYP2B7P	1556		cytochrome P450 family 2 subfamily B member 7, pseudogene		16	0.76	0.385		0.01		1	1	0	2016	2016
Non-alcoholic Fatty Liver Disease	C0400966	CYP2D7	1564	A0A087X1C5	cytochrome P450 family 2 subfamily D member 7 (gene/pseudogene)		42	0.659	0.577		0.01		1	1	0	2019	2019
Non-alcoholic Fatty Liver Disease	C0400966	CYP2J2	1573	P51589	cytochrome P450 family 2 subfamily J member 2		65	0.628	0.615	1.6181e-15	0.01		1	1	0	2015	2015
Non-alcoholic Fatty Liver Disease	C0400966	CYP4A11	1579	Q02928	cytochrome P450 family 4 subfamily A member 11	Enzyme	34	0.695	0.462	1.087e-24	0.01		1	1	0	2007	2007
Non-alcoholic Fatty Liver Disease	C0400966	CYP8B1	1582	Q9UNU6	cytochrome P450 family 8 subfamily B member 1		32	0.711	0.269	2.0558e-05	0.01		1	1	0	2018	2018
Non-alcoholic Fatty Liver Disease	C0400966	CYP19A1	1588	P11511	cytochrome P450 family 19 subfamily A member 1	Enzyme	519	0.41	0.885	1.7022e-05	0.01		0	1	0	2019	2019
Non-alcoholic Fatty Liver Disease	C0400966	CYP27B1	1594	O15528	cytochrome P450 family 27 subfamily B member 1	Enzyme	229	0.502	0.769	1.9194e-07	0.01		1	1	0	2019	2019
Non-alcoholic Fatty Liver Disease	C0400966	CYP51A1	1595	Q16850	cytochrome P450 family 51 subfamily A member 1	Enzyme	42	0.653	0.615	1.4563e-07	0.01		1	1	0	2018	2018
Non-alcoholic Fatty Liver Disease	C0400966	DBP	1628	Q10586	D-box binding PAR bZIP transcription factor	Nucleic acid binding	105	0.556	0.731	0.23376	0.01		1	1	0	2019	2019
Non-alcoholic Fatty Liver Disease	C0400966	TMPRSS6	164656	Q8IU80	transmembrane serine protease 6	Enzyme	113	0.584	0.654	4.1369e-10	0.01		1	1	1	2012	2012
Non-alcoholic Fatty Liver Disease	C0400966	AEBP1	165	Q8IUX7	AE binding protein 1		69	0.631	0.654	7.3471e-11	0.01		1	1	0	2017	2017
Non-alcoholic Fatty Liver Disease	C0400966	DDOST	1650	P39656	dolichyl-diphosphooligosaccharide--protein glycosyltransferase non-catalytic subunit	Enzyme	65	0.644	0.692	0.00061409	0.01		1	1	0	2016	2016
Non-alcoholic Fatty Liver Disease	C0400966	TIMM8A	1678	O60220	translocase of inner mitochondrial membrane 8A		200	0.51	0.846	0.65195	0.01		1	1	0	2020	2020
Non-alcoholic Fatty Liver Disease	C0400966	DHCR7	1717	Q9UBM7	7-dehydrocholesterol reductase	Enzyme	266	0.5	0.846	3.949e-13	0.01		1	1	0	2019	2019
Non-alcoholic Fatty Liver Disease	C0400966	DIO3	1735	P55073	iodothyronine deiodinase 3		80	0.593	0.731	0.62331	0.01		1	1	0	2016	2016
Non-alcoholic Fatty Liver Disease	C0400966	DMD	1756	P11532	dystrophin		484	0.423	0.923	1	0.01		1	1	0	2018	2018
Non-alcoholic Fatty Liver Disease	C0400966	DPYSL3	1809	Q14195	dihydropyrimidinase like 3	Enzyme	52	0.628	0.462	0.99887	0.01		1	1	0	2017	2017
Non-alcoholic Fatty Liver Disease	C0400966	SLC26A3	1811	P40879	solute carrier family 26 member 3	Transporter	128	0.554	0.692	1.3699e-13	0.01		1	1	0	2018	2018
Non-alcoholic Fatty Liver Disease	C0400966	JAG1	182	P78504	jagged canonical Notch ligand 1		420	0.429	0.808	1	0.01		1	1	0	2017	2017
Non-alcoholic Fatty Liver Disease	C0400966	DSPP	1834	Q9NZW4	dentin sialophosphoprotein		114	0.556	0.769	1.1191e-07	0.01		1	1	0	2019	2019
Non-alcoholic Fatty Liver Disease	C0400966	DUSP9	1852	Q99956	dual specificity phosphatase 9		26	0.705	0.308	0.81981	0.01		1	1	0	2019	2019
Non-alcoholic Fatty Liver Disease	C0400966	EDA	1896	Q92838	ectodysplasin A		150	0.553	0.808	0.97391	0.01		1	1	0	2019	2019
Non-alcoholic Fatty Liver Disease	C0400966	S1PR1	1901	P21453	sphingosine-1-phosphate receptor 1	G-protein coupled receptor	126	0.546	0.769	0.73269	0.01		1	1	0	2015	2015
Non-alcoholic Fatty Liver Disease	C0400966	EEF1A1	1915	P68104	eukaryotic translation elongation factor 1 alpha 1	Enzyme	88	0.584	0.654	0.97863	0.01		1	1	0	2015	2015
Non-alcoholic Fatty Liver Disease	C0400966	EGF	1950	P01133	epidermal growth factor		774	0.357	0.923	8.5294e-17	0.01		1	1	0	2019	2019
Non-alcoholic Fatty Liver Disease	C0400966	EGR1	1958	P18146	early growth response 1	Nucleic acid binding	378	0.433	0.923	0.3509	0.01		1	1	0	2019	2019
Non-alcoholic Fatty Liver Disease	C0400966	EIF4E	1977	P06730	eukaryotic translation initiation factor 4E	Nucleic acid binding	317	0.448	0.846	0.94133	0.01		1	1	0	2019	2019
Non-alcoholic Fatty Liver Disease	C0400966	A2M	2	P01023	alpha-2-macroglobulin	Enzyme modulator	147	0.529	0.769	4.5229e-11	0.01		1	1	0	2019	2019
Non-alcoholic Fatty Liver Disease	C0400966	LINC01554	202299	Q52M75	long intergenic non-protein coding RNA 1554		4	0.931	0.077	0.076951	0.01		0	1	0	2017	2017
Non-alcoholic Fatty Liver Disease	C0400966	ENO3	2027	P13929	enolase 3	Enzyme	24	0.769	0.308	1.5718e-19	0.01		1	1	0	2019	2019
Non-alcoholic Fatty Liver Disease	C0400966	EPHB2	2048	P29323	EPH receptor B2	Kinase	649	0.374	0.846	0.99997	0.01		1	1	0	2018	2018
Non-alcoholic Fatty Liver Disease	C0400966	EPHB6	2051	O15197	EPH receptor B6	Kinase	60	0.619	0.538	1.2013e-07	0.01		1	1	0	2018	2018
Non-alcoholic Fatty Liver Disease	C0400966	EPO	2056	P01588	erythropoietin		646	0.381	0.885	0.01125	0.01		1	1	0	2019	2019
Non-alcoholic Fatty Liver Disease	C0400966	AKT2	208	P31751	AKT serine/threonine kinase 2	Kinase	264	0.474	0.769	0.64432	0.01		1	1	0	2018	2018
Non-alcoholic Fatty Liver Disease	C0400966	ERN1	2081	O75460	endoplasmic reticulum to nucleus signaling 1	Kinase	163	0.513	0.808	0.99027	0.01		1	1	0	2018	2018
Non-alcoholic Fatty Liver Disease	C0400966	ESRRB	2103	O95718	estrogen related receptor beta	Nuclear receptor	102	0.565	0.846	0.12609	0.01		1	1	0	2018	2018
Non-alcoholic Fatty Liver Disease	C0400966	EZH2	2146	Q15910	enhancer of zeste 2 polycomb repressive complex 2 subunit	Epigenetic regulator	653	0.376	0.885	1	0.01		1	1	0	2013	2013
Non-alcoholic Fatty Liver Disease	C0400966	F2RL1	2150	P55085	F2R like trypsin receptor 1	G-protein coupled receptor	256	0.48	0.769	0.00014843	0.01		1	1	0	2019	2019
Non-alcoholic Fatty Liver Disease	C0400966	FABP2	2169	P12104	fatty acid binding protein 2		65	0.608	0.654	0.0049806	0.01		1	1	1	2010	2010
Non-alcoholic Fatty Liver Disease	C0400966	FABP5	2171	Q01469	fatty acid binding protein 5		85	0.585	0.731	0.047008	0.01		1	1	0	2007	2007
Non-alcoholic Fatty Liver Disease	C0400966	ACSL1	2180	P33121	acyl-CoA synthetase long chain family member 1	Enzyme	68	0.617	0.577	0.0015324	0.01		1	1	0	2015	2015
Non-alcoholic Fatty Liver Disease	C0400966	PTK2B	2185	Q14289	protein tyrosine kinase 2 beta	Kinase	319	0.448	0.808	0.93536	0.01		1	1	0	2018	2018
Non-alcoholic Fatty Liver Disease	C0400966	UNC5B	219699	Q8IZJ1	unc-5 netrin receptor B	Receptor	38	0.682	0.462	2.6935e-07	0.01		1	1	0	2018	2018
Non-alcoholic Fatty Liver Disease	C0400966	FBN1	2200	P35555	fibrillin 1	Calcium-binding protein	552	0.417	0.846	1	0.01		1	1	0	2019	2019
Non-alcoholic Fatty Liver Disease	C0400966	MARCHF8	220972	Q5T0T0	membrane associated ring-CH-type finger 8		87	0.59	0.692	5.8689e-07	0.01		1	1	0	2018	2018
Non-alcoholic Fatty Liver Disease	C0400966	FCGR3A	2214	P08637	Fc fragment of IgG receptor IIIa	Cell adhesion	352	0.432	0.962	3.6955e-06	0.01		1	1	0	2016	2016
Non-alcoholic Fatty Liver Disease	C0400966	FCGR3B	2215	O75015	Fc fragment of IgG receptor IIIb	Cell adhesion	291	0.452	0.962	3.0294e-07	0.01		1	1	0	2016	2016
Non-alcoholic Fatty Liver Disease	C0400966	JAZF1	221895	Q86VZ6	JAZF zinc finger 1		102	0.582	0.654	0.89582	0.01		1	1	0	2018	2018
Non-alcoholic Fatty Liver Disease	C0400966	GPC4	2239	O75487	glypican 4		181	0.547	0.769	0.92613	0.01		1	1	0	2014	2014
Non-alcoholic Fatty Liver Disease	C0400966	FGF1	2246	P05230	fibroblast growth factor 1	Signaling	184	0.507	0.846	0.44406	0.01		1	1	0	2016	2016
Non-alcoholic Fatty Liver Disease	C0400966	FGR	2268	P09769	FGR proto-oncogene, Src family tyrosine kinase	Kinase	56	0.647	0.615	0.48408	0.01		1	1	0	2016	2016
Non-alcoholic Fatty Liver Disease	C0400966	MLXIP	22877	Q9HAP2	MLX interacting protein		70	0.597	0.692	0.98932	0.01		1	1	0	2018	2018
Non-alcoholic Fatty Liver Disease	C0400966	ZHX2	22882	Q9Y6X8	zinc fingers and homeoboxes 2	Transcription factor	172	0.51	0.654	0.03372	0.01		1	1	0	2019	2019
Non-alcoholic Fatty Liver Disease	C0400966	ALDOB	229	P05062	aldolase, fructose-bisphosphate B		80	0.623	0.538	7.8786e-07	0.01		1	1	0	2019	2019
Non-alcoholic Fatty Liver Disease	C0400966	DKK1	22943	O94907	dickkopf WNT signaling pathway inhibitor 1		372	0.439	0.885	0.17423	0.01		1	1	0	2019	2019
Non-alcoholic Fatty Liver Disease	C0400966	PHLPP2	23035	Q6ZVD8	PH domain and leucine rich repeat protein phosphatase 2		45	0.641	0.346	1.2128e-06	0.01		1	1	0	2017	2017
Non-alcoholic Fatty Liver Disease	C0400966	SARM1	23098	Q6SZW1	sterile alpha and TIR motif containing 1		40	0.682	0.346	1.7007e-10	0.01		1	1	0	2018	2018
Non-alcoholic Fatty Liver Disease	C0400966	AKR1B1	231	P15121	aldo-keto reductase family 1 member B	Enzyme	220	0.491	0.885	2.0216e-05	0.01		1	1	0	2019	2019
Non-alcoholic Fatty Liver Disease	C0400966	MPRIP	23164	Q6WCQ1	myosin phosphatase Rho interacting protein	Enzyme modulator	113	0.556	0.885	0.98078	0.01		1	1	0	2018	2018
Non-alcoholic Fatty Liver Disease	C0400966	MCF2L	23263	O15068	MCF.2 cell line derived transforming sequence like	Signaling	124	0.559	0.769	2.7178e-07	0.01		1	1	0	2016	2016
Non-alcoholic Fatty Liver Disease	C0400966	CRTC1	23373	Q6UUV9	CREB regulated transcription coactivator 1	Transcription factor	115	0.565	0.692	0.531	0.01		1	1	0	2016	2016
Non-alcoholic Fatty Liver Disease	C0400966	SIRT4	23409	Q9Y6E7	sirtuin 4	Epigenetic regulator	74	0.603	0.654	6.8625e-10	0.01		1	1	0	2018	2018
Non-alcoholic Fatty Liver Disease	C0400966	ANGPTL2	23452	Q9UKU9	angiopoietin like 2	Signaling	125	0.545	0.731	0.0014712	0.01		1	1	0	2018	2018
Non-alcoholic Fatty Liver Disease	C0400966	BRD4	23476	O60885	bromodomain containing 4	Epigenetic regulator	335	0.446	0.885	1	0.01		1	1	0	2018	2018
Non-alcoholic Fatty Liver Disease	C0400966	SRRM2	23524	Q9UQ35	serine/arginine repetitive matrix 2		101	0.564	0.692	1	0.01		1	1	0	2019	2019
Non-alcoholic Fatty Liver Disease	C0400966	MMD	23531	Q15546	monocyte to macrophage differentiation associated	Receptor	58	0.647	0.577	0.0001344	0.01		1	1	0	2018	2018
Non-alcoholic Fatty Liver Disease	C0400966	FOSB	2354	P53539	FosB proto-oncogene, AP-1 transcription factor subunit	Transcription factor	278	0.463	0.846	0.97553	0.01		1	1	0	2014	2014
Non-alcoholic Fatty Liver Disease	C0400966	FOSL2	2355	P15408	FOS like 2, AP-1 transcription factor subunit	Transcription factor	83	0.595	0.692	0.98293	0.01		1	1	0	2014	2014
Non-alcoholic Fatty Liver Disease	C0400966	DDAH1	23576	O94760	dimethylarginine dimethylaminohydrolase 1	Enzyme	73	0.604	0.615	0.0027974	0.01		1	1	0	2017	2017
Non-alcoholic Fatty Liver Disease	C0400966	DAPK2	23604	Q9UIK4	death associated protein kinase 2	Kinase	130	0.536	0.692	5.0088e-10	0.01		1	1	0	2018	2018
Non-alcoholic Fatty Liver Disease	C0400966	MKRN1	23608	Q9UHC7	makorin ring finger protein 1	Enzyme	13	0.805	0.269	0.99421	0.01		1	1	0	2018	2018
Non-alcoholic Fatty Liver Disease	C0400966	TMEFF2	23671	Q9UIK5	transmembrane protein with EGF like and two follistatin like domains 2	Enzyme modulator	63	0.619	0.5	7.3885e-05	0.01		1	1	0	2019	2019
Non-alcoholic Fatty Liver Disease	C0400966	IL17RA	23765	Q96F46	interleukin 17 receptor A		159	0.529	0.808	0.00035636	0.01		1	1	0	2019	2019
Non-alcoholic Fatty Liver Disease	C0400966	ZBTB38	253461	Q8NAP3	zinc finger and BTB domain containing 38	Transcription factor	60	0.663	0.615	0.99949	0.01		1	1	0	2018	2018
Non-alcoholic Fatty Liver Disease	C0400966	G6PC	2538	P35575	glucose-6-phosphatase catalytic subunit		132	0.56	0.692	1.8404e-05	0.01		1	1	0	2016	2016
Non-alcoholic Fatty Liver Disease	C0400966	PRDX5	25824	P30044	peroxiredoxin 5		153	0.522	0.808	0.00017921	0.01		1	1	0	2020	2020
Non-alcoholic Fatty Liver Disease	C0400966	GALR1	2587	P47211	galanin receptor 1	G-protein coupled receptor	44	0.656	0.5	0.00053174	0.01		1	1	0	2020	2020
Non-alcoholic Fatty Liver Disease	C0400966	RNF19A	25897	Q9NV58	ring finger protein 19A, RBR E3 ubiquitin protein ligase	Enzyme	523	0.397	0.923	0.025305	0.01		1	1	0	2019	2019
Non-alcoholic Fatty Liver Disease	C0400966	WWTR1	25937	Q9GZV5	WW domain containing transcription regulator 1	Enzyme modulator	134	0.529	0.615	0.93914	0.01		1	1	0	2019	2019
Non-alcoholic Fatty Liver Disease	C0400966	TIPARP	25976	Q7Z3E1	TCDD inducible poly(ADP-ribose) polymerase		25	0.711	0.346	0.99991	0.01		1	1	0	2017	2017
Non-alcoholic Fatty Liver Disease	C0400966	OSBPL3	26031	Q9H4L5	oxysterol binding protein like 3		10	0.839	0.192	1.585e-06	0.01		1	1	0	2017	2017
Non-alcoholic Fatty Liver Disease	C0400966	APPL1	26060	Q9UKG1	adaptor protein, phosphotyrosine interacting with PH domain and leucine zipper 1		63	0.626	0.5	0.7952	0.01		1	1	2	2013	2013
Non-alcoholic Fatty Liver Disease	C0400966	POLDIP2	26073	Q9Y2S7	DNA polymerase delta interacting protein 2		530	0.396	0.923	0.41407	0.01		1	1	0	2019	2019
Non-alcoholic Fatty Liver Disease	C0400966	TOR1AIP1	26092	Q5JTV8	torsin 1A interacting protein 1		39	0.729	0.346	1.2719e-09	0.01		1	1	0	2019	2019
Non-alcoholic Fatty Liver Disease	C0400966	PRPF31	26121	Q8WWY3	pre-mRNA processing factor 31	Nucleic acid binding	150	0.531	0.731	0.98313	0.01		1	1	0	2019	2019
Non-alcoholic Fatty Liver Disease	C0400966	TRPC4AP	26133	Q8TEL6	transient receptor potential cation channel subfamily C member 4 associated protein		19	0.76	0.231	0.55209	0.01		1	1	0	2018	2018
Non-alcoholic Fatty Liver Disease	C0400966	AMD1	262	P17707	adenosylmethionine decarboxylase 1	Enzyme	84	0.593	0.577	0.98227	0.01		1	1	0	2018	2018
Non-alcoholic Fatty Liver Disease	C0400966	FGF20	26281	Q9NP95	fibroblast growth factor 20	Signaling	45	0.663	0.577	0.81379	0.01		1	1	0	2015	2015
Non-alcoholic Fatty Liver Disease	C0400966	AMD1P2	263		adenosylmethionine decarboxylase 1 pseudogene 2		71	0.608	0.538		0.01		1	1	0	2018	2018
Non-alcoholic Fatty Liver Disease	C0400966	LATS2	26524	Q9NRM7	large tumor suppressor kinase 2	Kinase	106	0.554	0.654	0.98807	0.01		1	1	0	2016	2016
Non-alcoholic Fatty Liver Disease	C0400966	AATF	26574	Q9NY61	apoptosis antagonizing transcription factor	Transcription factor	44	0.641	0.731	2.5958e-12	0.01		1	1	0	2019	2019
Non-alcoholic Fatty Liver Disease	C0400966	GDNF	2668	P39905	glial cell derived neurotrophic factor	Signaling	409	0.434	0.885	0.2035	0.01		1	1	0	2016	2016
Non-alcoholic Fatty Liver Disease	C0400966	NOX1	27035	Q9Y5S8	NADPH oxidase 1		142	0.536	0.808	8.6564e-08	0.01		1	1	0	2018	2018
Non-alcoholic Fatty Liver Disease	C0400966	SIGLEC7	27036	Q9Y286	sialic acid binding Ig like lectin 7	Receptor	137	0.535	0.846	2.388e-07	0.01		1	1	0	2019	2019
Non-alcoholic Fatty Liver Disease	C0400966	INTU	27152	Q9ULD6	inturned planar cell polarity protein		134	0.555	0.769	7.6977e-10	0.01		1	1	0	2018	2018
Non-alcoholic Fatty Liver Disease	C0400966	NAAA	27163	Q02083	N-acylethanolamine acid amidase	Enzyme	90	0.579	0.692	2.0742e-10	0.01		1	1	0	2019	2019
Non-alcoholic Fatty Liver Disease	C0400966	IL37	27178	Q9NZH6	interleukin 37		280	0.459	0.846	0.00012343	0.01		1	1	0	2018	2018
Non-alcoholic Fatty Liver Disease	C0400966	GPC3	2719	P51654	glypican 3		311	0.466	0.808	0.9982	0.01		1	1	0	2008	2008
Non-alcoholic Fatty Liver Disease	C0400966	GLB1	2720	P16278	galactosidase beta 1	Enzyme	385	0.448	0.808	7.9215e-10	0.01		1	1	0	2006	2006
Non-alcoholic Fatty Liver Disease	C0400966	GCLC	2729	P48506	glutamate-cysteine ligase catalytic subunit	Enzyme	198	0.509	0.885	0.42718	0.01		1	1	1	2011	2011
Non-alcoholic Fatty Liver Disease	C0400966	RBMS3	27303	Q6XE24	RNA binding motif single stranded interacting protein 3		116	0.553	0.692	0.2128	0.01		1	1	0	2019	2019
Non-alcoholic Fatty Liver Disease	C0400966	GLI2	2736	P10070	GLI family zinc finger 2		351	0.446	0.846	0.97303	0.01		1	1	0	2017	2017
Non-alcoholic Fatty Liver Disease	C0400966	MAT2B	27430	Q9NZL9	methionine adenosyltransferase 2B		48	0.644	0.5	0.046226	0.01		1	1	0	2019	2019
Non-alcoholic Fatty Liver Disease	C0400966	GLRX	2745	P35754	glutaredoxin		65	0.619	0.577	5.6744e-07	0.01		1	1	0	2017	2017
Non-alcoholic Fatty Liver Disease	C0400966	GNA12	2768	Q03113	G protein subunit alpha 12	Enzyme modulator	130	0.547	0.769	0.96994	0.01		1	1	0	2018	2018
Non-alcoholic Fatty Liver Disease	C0400966	GNAI3	2773	P08754	G protein subunit alpha i3	Enzyme modulator	75	0.653	0.615	0.038287	0.01		1	1	0	2019	2019
Non-alcoholic Fatty Liver Disease	C0400966	GNAO1	2775	P09471	G protein subunit alpha o1	Enzyme modulator	188	0.523	0.808	0.98963	0.01		1	1	0	2014	2014
Non-alcoholic Fatty Liver Disease	C0400966	ABO	28	P16442	ABO, alpha 1-3-N-acetylgalactosaminyltransferase and alpha 1-3-galactosyltransferase	Enzyme	443	0.427	0.885		0.01		1	1	0	2019	2019
Non-alcoholic Fatty Liver Disease	C0400966	GPI	2821	P06744	glucose-6-phosphate isomerase	Enzyme	218	0.491	0.769	2.8385e-06	0.01		1	1	0	2019	2019
Non-alcoholic Fatty Liver Disease	C0400966	ANGPT1	284	Q15389	angiopoietin 1	Signaling	340	0.446	0.808	0.95208	0.01		1	1	0	2018	2018
Non-alcoholic Fatty Liver Disease	C0400966	BTBD8	284697	Q5XKL5	BTB domain containing 8		125	0.547	0.692	6.077e-07	0.01		1	1	0	2017	2017
Non-alcoholic Fatty Liver Disease	C0400966	ANGPT2	285	O15123	angiopoietin 2	Signaling	457	0.41	0.846	0.83208	0.01		1	1	0	2019	2019
Non-alcoholic Fatty Liver Disease	C0400966	GPR31	2853	O00270	G protein-coupled receptor 31	G-protein coupled receptor	7	0.839	0.115	0.020514	0.01		1	1	0	2019	2019
Non-alcoholic Fatty Liver Disease	C0400966	FFAR2	2867	O15552	free fatty acid receptor 2	G-protein coupled receptor	45	0.686	0.462	0.0094238	0.01		1	1	0	2019	2019
Non-alcoholic Fatty Liver Disease	C0400966	GPS2	2874	Q13227	G protein pathway suppressor 2	Enzyme modulator	25	0.691	0.346	0.053179	0.01		1	1	0	2019	2019
Non-alcoholic Fatty Liver Disease	C0400966	MYLIP	29116	Q8WY64	myosin regulatory light chain interacting protein		79	0.582	0.692	0.18431	0.01		1	1	0	2018	2018
Non-alcoholic Fatty Liver Disease	C0400966	CTNNA3	29119	Q9UI47	catenin alpha 3	Cellular structure	73	0.612	0.692	1.0225e-12	0.01		1	1	0	2017	2017
Non-alcoholic Fatty Liver Disease	C0400966	GSK3B	2932	P49841	glycogen synthase kinase 3 beta	Kinase	393	0.43	0.846	0.95571	0.01		1	1	0	2014	2014
Non-alcoholic Fatty Liver Disease	C0400966	GSTM2	2946	P28161	glutathione S-transferase mu 2		195	0.488	0.808	3.3913e-07	0.01		1	1	0	2009	2009
Non-alcoholic Fatty Liver Disease	C0400966	REPIN1	29803	Q9BWE0	replication initiator 1	Transcription factor	13	0.792	0.231	0.09473	0.01		1	1	0	2019	2019
Non-alcoholic Fatty Liver Disease	C0400966	CERS2	29956	Q96G23	ceramide synthase 2		40	0.691	0.5	0.47978	0.01		1	1	0	2019	2019
Non-alcoholic Fatty Liver Disease	C0400966	DMGDH	29958	Q9UI17	dimethylglycine dehydrogenase	Enzyme	15	0.89	0.154	2.0503e-24	0.01		1	1	1	2017	2017
Non-alcoholic Fatty Liver Disease	C0400966	SLC2A8	29988	Q9NY64	solute carrier family 2 member 8	Transporter	10	0.821	0.346	8.0241e-07	0.01		1	1	0	2014	2014
Non-alcoholic Fatty Liver Disease	C0400966	SLC40A1	30061	Q9NP59	solute carrier family 40 member 1	Transporter	101	0.57	0.731	0.98835	0.01		1	1	0	2008	2008
Non-alcoholic Fatty Liver Disease	C0400966	H2AX	3014	P16104	H2A.X variant histone	Nucleic acid binding	212	0.484	0.808	0.17652	0.01		1	1	0	2017	2017
Non-alcoholic Fatty Liver Disease	C0400966	HADHB	3032	P55084	hydroxyacyl-CoA dehydrogenase trifunctional multienzyme complex subunit beta	Enzyme	101	0.619	0.692	1.5183e-11	0.01		1	1	0	2016	2016
Non-alcoholic Fatty Liver Disease	C0400966	HADH	3033	Q16836	hydroxyacyl-CoA dehydrogenase		72	0.65	0.538	6.5638e-05	0.01		1	1	0	2016	2016
Non-alcoholic Fatty Liver Disease	C0400966	HCFC1	3054	P51610	host cell factor C1		100	0.601	0.692	1	0.01		1	1	0	2019	2019
Non-alcoholic Fatty Liver Disease	C0400966	HLA-A	3105	P04439	major histocompatibility complex, class I, A		672	0.37	0.846	0.0013299	0.01		1	1	1	2014	2014
Non-alcoholic Fatty Liver Disease	C0400966	HLA-C	3107	P10321	major histocompatibility complex, class I, C		435	0.415	0.846	1.5695e-06	0.01		1	1	0	2019	2019
Non-alcoholic Fatty Liver Disease	C0400966	HLA-DQA1	3117	P01909	major histocompatibility complex, class II, DQ alpha 1	Immune response	427	0.416	0.846	0.023947	0.01		1	1	0	2019	2019
Non-alcoholic Fatty Liver Disease	C0400966	HLA-DQB1	3119	P01920	major histocompatibility complex, class II, DQ beta 1	Immune response	504	0.407	0.885	0.0089259	0.01		1	1	0	2014	2014
Non-alcoholic Fatty Liver Disease	C0400966	HLA-DQB2	3120	P05538	major histocompatibility complex, class II, DQ beta 2	Immune response	91	0.573	0.731	0.042679	0.01		1	1	0	2014	2014
Non-alcoholic Fatty Liver Disease	C0400966	HLA-DRB1	3123	P01911	major histocompatibility complex, class II, DR beta 1	Immune response	1018	0.333	0.923	0.0010997	0.01		1	1	0	2019	2019
Non-alcoholic Fatty Liver Disease	C0400966	AOX1	316	Q06278	aldehyde oxidase 1	Enzyme	26	0.716	0.308	1.171e-31	0.01		1	1	0	2018	2018
Non-alcoholic Fatty Liver Disease	C0400966	NR4A1	3164	P22736	nuclear receptor subfamily 4 group A member 1	Nuclear receptor	216	0.49	0.731	0.37074	0.01		1	1	0	2018	2018
Non-alcoholic Fatty Liver Disease	C0400966	FOXA2	3170	Q9Y261	forkhead box A2	Transcription factor	143	0.528	0.769	0.74225	0.01		0	1	0	2008	2008
Non-alcoholic Fatty Liver Disease	C0400966	BPIFA4P	317716	Q86YQ2	BPI fold containing family A member 4, pseudogene		32	0.711	0.654		0.01		1	1	0	2019	2019
Non-alcoholic Fatty Liver Disease	C0400966	APOF	319	Q13790	apolipoprotein F		9	0.805	0.231	0.010295	0.01		1	1	0	2017	2017
Non-alcoholic Fatty Liver Disease	C0400966	HOXD13	3239	P35453	homeobox D13		259	0.483	0.808	0.0086055	0.01		1	1	0	2019	2019
Non-alcoholic Fatty Liver Disease	C0400966	AIRE	326	O43918	autoimmune regulator		175	0.516	0.808	4.0468e-12	0.01		1	1	0	2018	2018
Non-alcoholic Fatty Liver Disease	C0400966	HRG	3273	P04196	histidine rich glycoprotein	Enzyme modulator	72	0.603	0.577	5.8888e-14	0.01		1	1	0	2018	2018
Non-alcoholic Fatty Liver Disease	C0400966	PRMT1	3276	Q99873	protein arginine methyltransferase 1	Epigenetic regulator	110	0.552	0.808	0.99907	0.01		1	1	0	2014	2014
Non-alcoholic Fatty Liver Disease	C0400966	HSPA4	3308	P34932	heat shock protein family A (Hsp70) member 4		550	0.394	0.923	0.99954	0.01		0	1	0	2018	2018
Non-alcoholic Fatty Liver Disease	C0400966	HSPA5	3309	P11021	heat shock protein family A (Hsp70) member 5		350	0.434	0.885	0.77341	0.01		1	1	0	2010	2010
Non-alcoholic Fatty Liver Disease	C0400966	XIAP	331	P98170	X-linked inhibitor of apoptosis	Enzyme modulator	321	0.447	0.808	0.91837	0.01		1	1	0	2019	2019
Non-alcoholic Fatty Liver Disease	C0400966	HSPA8	3312	P11142	heat shock protein family A (Hsp70) member 8		124	0.553	0.808	0.99863	0.01		1	1	0	2019	2019
Non-alcoholic Fatty Liver Disease	C0400966	HSPG2	3339	P98160	heparan sulfate proteoglycan 2	Enzyme modulator	405	0.438	0.885	1.0376e-19	0.01		1	1	0	2017	2017
Non-alcoholic Fatty Liver Disease	C0400966	APOA1	335	P02647	apolipoprotein A1		416	0.429	0.885	0.00054909	0.01		1	1	0	2019	2019
Non-alcoholic Fatty Liver Disease	C0400966	HTR2A	3356	P28223	5-hydroxytryptamine receptor 2A	G-protein coupled receptor	289	0.473	0.846	0.51124	0.01		1	1	0	2018	2018
Non-alcoholic Fatty Liver Disease	C0400966	APOA2	336	P02652	apolipoprotein A2	Transporter	77	0.582	0.769	0.0448	0.01		1	1	0	2019	2019
Non-alcoholic Fatty Liver Disease	C0400966	TNC	3371	P24821	tenascin C		369	0.433	0.846	1.2592e-07	0.01		1	1	0	2019	2019
Non-alcoholic Fatty Liver Disease	C0400966	HCAR2	338442	Q8TDS4	hydroxycarboxylic acid receptor 2		65	0.631	0.692	0.00018933	0.01		1	1	0	2018	2018
Non-alcoholic Fatty Liver Disease	C0400966	C1QTNF9	338872	P0C862	C1q and TNF related 9		30	0.695	0.385	1.1372e-05	0.01		1	1	0	2018	2018
Non-alcoholic Fatty Liver Disease	C0400966	STING1	340061	Q86WV6	stimulator of interferon response cGAMP interactor 1		159	0.522	0.769	0.0012067	0.01		1	1	0	2018	2018
Non-alcoholic Fatty Liver Disease	C0400966	CPP	340451		ceruloplasmin pseudogene		55	0.631	0.731		0.01		1	1	0	2018	2018
Non-alcoholic Fatty Liver Disease	C0400966	IFNA1	3439	P01562	interferon alpha 1		662	0.371	0.923		0.01		1	1	0	2019	2019
Non-alcoholic Fatty Liver Disease	C0400966	IFNA2	3440	P01563	interferon alpha 2		355	0.442	0.885		0.01		1	1	0	2019	2019
Non-alcoholic Fatty Liver Disease	C0400966	IFNA13	3447	P01562	interferon alpha 13		646	0.374	0.923		0.01		1	1	0	2019	2019
Non-alcoholic Fatty Liver Disease	C0400966	MOGAT3	346606	Q86VF5	monoacylglycerol O-acyltransferase 3		2	0.931	0.115	1.8376e-12	0.01		1	1	0	2012	2012
Non-alcoholic Fatty Liver Disease	C0400966	IGF2	3481	P01344	insulin like growth factor 2		604	0.39	0.885	0.044127	0.01		1	1	0	2018	2018
Non-alcoholic Fatty Liver Disease	C0400966	IGFBP1	3484	P08833	insulin like growth factor binding protein 1	Enzyme modulator	191	0.502	0.808	0.00094677	0.01		1	1	0	2017	2017
Non-alcoholic Fatty Liver Disease	C0400966	IGFBP2	3485	P18065	insulin like growth factor binding protein 2	Enzyme modulator	241	0.478	0.769	0.11898	0.01		1	1	0	2013	2013
Non-alcoholic Fatty Liver Disease	C0400966	IGFBP4	3487	P22692	insulin like growth factor binding protein 4	Enzyme modulator	94	0.572	0.731	0.023057	0.01		1	1	0	2020	2020
Non-alcoholic Fatty Liver Disease	C0400966	IGFBP7	3490	Q16270	insulin like growth factor binding protein 7		241	0.476	0.769	0.0012873	0.01		1	1	0	2019	2019
Non-alcoholic Fatty Liver Disease	C0400966	KLK3	354	P07288	kallikrein related peptidase 3	Enzyme	358	0.443	0.885	4.4271e-06	0.01		1	1	0	2019	2019
Non-alcoholic Fatty Liver Disease	C0400966	IKBKB	3551	O14920	inhibitor of nuclear factor kappa B kinase subunit beta	Kinase	191	0.506	0.846	0.99192	0.01		1	1	0	2018	2018
Non-alcoholic Fatty Liver Disease	C0400966	IL2	3558	P60568	interleukin 2		950	0.336	0.885	0.47968	0.01		1	1	0	2017	2017
Non-alcoholic Fatty Liver Disease	C0400966	CXCR2	3579	P25025	C-X-C motif chemokine receptor 2	G-protein coupled receptor	335	0.445	0.923	0.013736	0.01		1	1	0	2016	2016
Non-alcoholic Fatty Liver Disease	C0400966	IRF2BP2	359948	Q7Z5L9	interferon regulatory factor 2 binding protein 2		72	0.641	0.5	0.84558	0.01		1	1	0	2019	2019
Non-alcoholic Fatty Liver Disease	C0400966	INPP5D	3635	Q92835	inositol polyphosphate-5-phosphatase D		109	0.558	0.731	0.97198	0.01		1	1	0	2017	2017
Non-alcoholic Fatty Liver Disease	C0400966	INSIG1	3638	O15503	insulin induced gene 1		29	0.695	0.5	0.0012827	0.01		1	1	0	2014	2014
Non-alcoholic Fatty Liver Disease	C0400966	AQP7	364	O14520	aquaporin 7	Ion channel	34	0.67	0.462	4.0504e-16	0.01		1	1	0	2019	2019
Non-alcoholic Fatty Liver Disease	C0400966	IRF3	3661	Q14653	interferon regulatory factor 3	Transcription factor	174	0.517	0.808	0.00011576	0.01		1	1	0	2018	2018
Non-alcoholic Fatty Liver Disease	C0400966	ITGAM	3684	P11215	integrin subunit alpha M		343	0.443	0.808	3.3148e-11	0.01		1	1	0	2016	2016
Non-alcoholic Fatty Liver Disease	C0400966	ITGB1	3688	P05556	integrin subunit beta 1	Receptor	210	0.496	0.808	0.98208	0.01		1	1	0	2017	2017
Non-alcoholic Fatty Liver Disease	C0400966	ITIH4	3700	Q14624	inter-alpha-trypsin inhibitor heavy chain 4	Enzyme modulator	129	0.559	0.769	6.4352e-13	0.01		1	1	0	2019	2019
Non-alcoholic Fatty Liver Disease	C0400966	ITPR2	3709	Q14571	inositol 1,4,5-trisphosphate receptor type 2	Ion channel	55	0.631	0.654	5.7127e-29	0.01		1	1	0	2018	2018
Non-alcoholic Fatty Liver Disease	C0400966	JAK1	3716	P23458	Janus kinase 1	Kinase	239	0.474	0.769	0.99998	0.01		1	1	0	2018	2018
Non-alcoholic Fatty Liver Disease	C0400966	JUN	3725	P05412	Jun proto-oncogene, AP-1 transcription factor subunit	Transcription factor	344	0.442	0.885	0.05962	0.01		1	1	0	2014	2014
Non-alcoholic Fatty Liver Disease	C0400966	JUNB	3726	P17275	JunB proto-oncogene, AP-1 transcription factor subunit	Transcription factor	264	0.467	0.769	0.86299	0.01		1	1	0	2014	2014
Non-alcoholic Fatty Liver Disease	C0400966	JUND	3727	P17535	JunD proto-oncogene, AP-1 transcription factor subunit	Transcription factor	242	0.475	0.808	0.70054	0.01		1	1	0	2014	2014
Non-alcoholic Fatty Liver Disease	C0400966	CD82	3732	P27701	CD82 molecule		172	0.507	0.731	1.2726e-08	0.01		1	1	1	2019	2019
Non-alcoholic Fatty Liver Disease	C0400966	AREG	374	P15514	amphiregulin	Signaling	221	0.487	0.769	0.35407	0.01		1	1	0	2015	2015
Non-alcoholic Fatty Liver Disease	C0400966	ACAT1	38	P24752	acetyl-CoA acetyltransferase 1	Enzyme	176	0.538	0.692	9.8525e-08	0.01		1	1	0	2009	2009
Non-alcoholic Fatty Liver Disease	C0400966	ARG2	384	P78540	arginase 2	Enzyme	103	0.569	0.731	0.00018207	0.01		1	1	0	2019	2019
Non-alcoholic Fatty Liver Disease	C0400966	KRT8	3856	P05787	keratin 8		166	0.517	0.654	2.36e-08	0.01		1	1	0	2017	2017
Non-alcoholic Fatty Liver Disease	C0400966	RTL1	388015	A6NKG5	retrotransposon Gag like 1		119	0.554	0.808	0.0056135	0.01		1	1	0	2018	2018
Non-alcoholic Fatty Liver Disease	C0400966	C1QL3	389941	Q5VWW1	complement C1q like 3		27	0.705	0.423	0.51567	0.01		1	1	0	2019	2019
Non-alcoholic Fatty Liver Disease	C0400966	LCAT	3931	P04180	lecithin-cholesterol acyltransferase	Enzyme	94	0.588	0.654	0.08102	0.01		1	1	0	2018	2018
Non-alcoholic Fatty Liver Disease	C0400966	LCP1	3936	P13796	lymphocyte cytosolic protein 1	Cellular structure	44	0.663	0.654	0.55261	0.01		1	1	0	2013	2013
Non-alcoholic Fatty Liver Disease	C0400966	LGALS3	3958	P17931	galectin 3	Signaling	557	0.392	0.846	2.3207e-05	0.01		1	1	0	2019	2019
Non-alcoholic Fatty Liver Disease	C0400966	LIPE	3991	Q05469	lipase E, hormone sensitive type		85	0.599	0.5	9.7458e-12	0.01		1	1	0	2007	2007
Non-alcoholic Fatty Liver Disease	C0400966	FADS1	3992	O60427	fatty acid desaturase 1		125	0.582	0.769	0.37384	0.01		1	1	1	2018	2018
Non-alcoholic Fatty Liver Disease	C0400966	LNPEP	4012	Q9UIQ6	leucyl and cystinyl aminopeptidase	Enzyme	174	0.514	0.731	0.99957	0.01		1	1	0	2018	2018
Non-alcoholic Fatty Liver Disease	C0400966	LOXL2	4017	Q9Y4K0	lysyl oxidase like 2		149	0.527	0.731	3.3844e-07	0.01		1	1	0	2017	2017
Non-alcoholic Fatty Liver Disease	C0400966	LRP6	4040	O75581	LDL receptor related protein 6		134	0.536	0.808	0.69664	0.01		1	1	0	2019	2019
Non-alcoholic Fatty Liver Disease	C0400966	LINC01194	404663		long intergenic non-protein coding RNA 1194		249	0.47	0.769		0.01		1	1	0	2020	2020
Non-alcoholic Fatty Liver Disease	C0400966	ARNT	405	P27540	aryl hydrocarbon receptor nuclear translocator	Transcription factor	104	0.575	0.692	0.99581	0.01		1	1	0	2019	2019
Non-alcoholic Fatty Liver Disease	C0400966	LTF	4057	P02788	lactotransferrin	Enzyme	133	0.543	0.846	1.2665e-21	0.01		1	1	0	2018	2018
Non-alcoholic Fatty Liver Disease	C0400966	LUM	4060	P51884	lumican		123	0.543	0.731	0.07696	0.01		1	1	0	2019	2019
Non-alcoholic Fatty Liver Disease	C0400966	MIR130A	406919		microRNA 130a		141	0.522	0.808		0.01		1	1	0	2019	2019
Non-alcoholic Fatty Liver Disease	C0400966	MIR132	406921		microRNA 132		222	0.485	0.846		0.01		1	1	0	2018	2018
Non-alcoholic Fatty Liver Disease	C0400966	MIR136	406927		microRNA 136		79	0.584	0.731		0.01		1	1	0	2018	2018
Non-alcoholic Fatty Liver Disease	C0400966	MIR141	406933		microRNA 141		179	0.497	0.808		0.01		1	1	0	2020	2020
Non-alcoholic Fatty Liver Disease	C0400966	MIR142	406934		microRNA 142		220	0.48	0.846		0.01		1	1	0	2019	2019
Non-alcoholic Fatty Liver Disease	C0400966	MIR143	406935		microRNA 143		267	0.462	0.885		0.01		1	1	0	2019	2019
Non-alcoholic Fatty Liver Disease	C0400966	MIR144	406936		microRNA 144		175	0.5	0.769		0.01		1	1	0	2016	2016
Non-alcoholic Fatty Liver Disease	C0400966	MIR146A	406938		microRNA 146a		505	0.398	0.885		0.01		1	1	0	2019	2019
Non-alcoholic Fatty Liver Disease	C0400966	MIR150	406942		microRNA 150		282	0.455	0.808		0.01		1	1	0	2017	2017
Non-alcoholic Fatty Liver Disease	C0400966	MIR15B	406949		microRNA 15b		134	0.532	0.769		0.01		1	1	0	2013	2013
Non-alcoholic Fatty Liver Disease	C0400966	MIR17	406952		microRNA 17		270	0.459	0.846		0.01		1	1	0	2018	2018
Non-alcoholic Fatty Liver Disease	C0400966	MIR185	406961		microRNA 185		106	0.551	0.808		0.01		1	1	0	2014	2014
Non-alcoholic Fatty Liver Disease	C0400966	MIR200B	406984		microRNA 200b		180	0.5	0.769		0.01		1	1	0	2016	2016
Non-alcoholic Fatty Liver Disease	C0400966	MIR205	406988		microRNA 205		210	0.482	0.846		0.01		1	1	0	2019	2019
Non-alcoholic Fatty Liver Disease	C0400966	MIR206	406989		microRNA 206		226	0.477	0.846		0.01		1	1	0	2017	2017
Non-alcoholic Fatty Liver Disease	C0400966	MIR212	406994		microRNA 212		126	0.535	0.808		0.01		1	1	0	2016	2016
Non-alcoholic Fatty Liver Disease	C0400966	MIR223	407008		microRNA 223		348	0.433	0.808		0.01		1	1	0	2019	2019
Non-alcoholic Fatty Liver Disease	C0400966	MIR23B	407011		microRNA 23b		137	0.523	0.808		0.01		1	1	0	2017	2017
Non-alcoholic Fatty Liver Disease	C0400966	MIR24-1	407012		microRNA 24-1		74	0.584	0.731		0.01		1	1	0	2014	2014
Non-alcoholic Fatty Liver Disease	C0400966	MIR27A	407018		microRNA 27a		248	0.466	0.846		0.01		1	1	0	2019	2019
Non-alcoholic Fatty Liver Disease	C0400966	MIR27B	407019		microRNA 27b		141	0.529	0.769		0.01		1	1	0	2014	2014
Non-alcoholic Fatty Liver Disease	C0400966	MIR29B1	407024		microRNA 29b-1		212	0.485	0.846		0.01		1	1	0	2019	2019
Non-alcoholic Fatty Liver Disease	C0400966	MIR29B2	407025		microRNA 29b-2		214	0.484	0.885		0.01		1	1	0	2019	2019
Non-alcoholic Fatty Liver Disease	C0400966	MIR29C	407026		microRNA 29c		183	0.496	0.808		0.01		1	1	0	2019	2019
Non-alcoholic Fatty Liver Disease	C0400966	MIR30B	407030		microRNA 30b		109	0.555	0.808		0.01		1	1	0	2019	2019
Non-alcoholic Fatty Liver Disease	C0400966	MIR30C1	407031		microRNA 30c-1		109	0.552	0.769		0.01		1	1	0	2016	2016
Non-alcoholic Fatty Liver Disease	C0400966	MIR30C2	407032		microRNA 30c-2		115	0.546	0.769		0.01		1	1	0	2016	2016
Non-alcoholic Fatty Liver Disease	C0400966	ARRB1	408	P49407	arrestin beta 1	Enzyme modulator	92	0.588	0.846	0.99394	0.01		1	1	0	2019	2019
Non-alcoholic Fatty Liver Disease	C0400966	SMAD7	4092	O15105	SMAD family member 7	Transcription factor	269	0.47	0.769	0.54854	0.01		1	1	0	2016	2016
Non-alcoholic Fatty Liver Disease	C0400966	MAT1A	4143	Q00266	methionine adenosyltransferase 1A	Enzyme	103	0.582	0.577	0.00080978	0.01		1	1	0	2017	2017
Non-alcoholic Fatty Liver Disease	C0400966	DNAJB9	4189	Q9UBS3	DnaJ heat shock protein family (Hsp40) member B9		27	0.7	0.385	0.36507	0.01		1	1	0	2019	2019
Non-alcoholic Fatty Liver Disease	C0400966	MEFV	4210	O15553	MEFV innate immuity regulator, pyrin		410	0.44	0.885	1.0177e-14	0.01		1	1	0	2017	2017
Non-alcoholic Fatty Liver Disease	C0400966	MET	4233	P08581	MET proto-oncogene, receptor tyrosine kinase	Kinase	594	0.38	0.846	0.96998	0.01		1	1	0	2019	2019
Non-alcoholic Fatty Liver Disease	C0400966	MIF	4282	P14174	macrophage migration inhibitory factor		455	0.412	0.885	0.012262	0.01		1	1	0	2010	2010
Non-alcoholic Fatty Liver Disease	C0400966	CXCL9	4283	Q07325	C-X-C motif chemokine ligand 9	Signaling	269	0.462	0.808	0.0029304	0.01		1	1	0	2020	2020
Non-alcoholic Fatty Liver Disease	C0400966	MMP9	4318	P14780	matrix metallopeptidase 9	Enzyme	1337	0.305	0.923	1.8869e-17	0.01		1	1	1	2018	2018
Non-alcoholic Fatty Liver Disease	C0400966	MPI	4351	P34949	mannose phosphate isomerase	Enzyme	101	0.585	0.654	1.1715e-07	0.01		1	1	0	2019	2019
Non-alcoholic Fatty Liver Disease	C0400966	MPO	4353	P05164	myeloperoxidase	Enzyme	653	0.377	0.923	7.105e-15	0.01		1	1	0	2017	2017
Non-alcoholic Fatty Liver Disease	C0400966	MPST	4357	P25325	mercaptopyruvate sulfurtransferase	Enzyme	81	0.588	0.654	3.4664e-05	0.01		1	1	0	2018	2018
Non-alcoholic Fatty Liver Disease	C0400966	MRC1	4360	P22897	mannose receptor C-type 1		431	0.413	0.846	0.94335	0.01		1	1	0	2019	2019
Non-alcoholic Fatty Liver Disease	C0400966	ASNS	440	P08243	asparagine synthetase (glutamine-hydrolyzing)	Enzyme	90	0.595	0.692	9.3611e-06	0.01		1	1	0	2018	2018
Non-alcoholic Fatty Liver Disease	C0400966	EIF2AK4	440275	Q9P2K8	eukaryotic translation initiation factor 2 alpha kinase 4		89	0.603	0.577	1.2356e-15	0.01		1	1	0	2018	2018
Non-alcoholic Fatty Liver Disease	C0400966	MIR330	442902		microRNA 330		81	0.584	0.692		0.01		1	1	0	2017	2017
Non-alcoholic Fatty Liver Disease	C0400966	MIR331	442903		microRNA 331		63	0.612	0.615		0.01		1	1	0	2016	2016
Non-alcoholic Fatty Liver Disease	C0400966	MIR367	442912		microRNA 367		71	0.59	0.654		0.01		1	1	0	2017	2017
Non-alcoholic Fatty Liver Disease	C0400966	MST1	4485	P26927	macrophage stimulating 1	Enzyme	281	0.465	0.885	4.7831e-19	0.01		1	1	0	2019	2019
Non-alcoholic Fatty Liver Disease	C0400966	ND6	4541	P03923	NADH dehydrogenase, subunit 6 (complex I)		224	0.544	0.808		0.01		1	1	0	2013	2013
Non-alcoholic Fatty Liver Disease	C0400966	MYC	4609	P01106	MYC proto-oncogene, bHLH transcription factor	Transcription factor	821	0.344	0.923	0.99801	0.01		1	1	0	2018	2018
Non-alcoholic Fatty Liver Disease	C0400966	MYD88	4615	Q99836	MYD88 innate immune signal transduction adaptor	Enzyme modulator	480	0.414	0.923	0.12443	0.01		1	1	0	2015	2015
Non-alcoholic Fatty Liver Disease	C0400966	HNRNPM	4670	P52272	heterogeneous nuclear ribonucleoprotein M	Nucleic acid binding	26	0.729	0.346	0.99999	0.01		1	1	0	2015	2015
Non-alcoholic Fatty Liver Disease	C0400966	ATF4	468	P18848	activating transcription factor 4		178	0.507	0.769	0.015659	0.01		1	1	0	2016	2016
Non-alcoholic Fatty Liver Disease	C0400966	NBN	4683	O60934	nibrin	Nucleic acid binding	291	0.467	0.808	2.1838e-16	0.01		1	1	0	2018	2018
Non-alcoholic Fatty Liver Disease	C0400966	NEU1	4758	Q99519	neuraminidase 1	Enzyme	207	0.513	0.769	7.3441e-05	0.01		1	1	0	2019	2019
Non-alcoholic Fatty Liver Disease	C0400966	NHS	4810	Q6T4R5	NHS actin remodeling regulator		295	0.466	0.846	0.99999	0.01		1	1	0	2017	2017
Non-alcoholic Fatty Liver Disease	C0400966	NNMT	4837	P40261	nicotinamide N-methyltransferase	Enzyme	103	0.559	0.654	5.2791e-08	0.01		1	1	1	2018	2018
Non-alcoholic Fatty Liver Disease	C0400966	NOS2	4843	P35228	nitric oxide synthase 2		783	0.364	0.923	4.0277e-15	0.01		1	1	0	2017	2017
Non-alcoholic Fatty Liver Disease	C0400966	NOS3	4846	P29474	nitric oxide synthase 3		706	0.378	0.885	6.7246e-07	0.01		1	1	0	2017	2017
Non-alcoholic Fatty Liver Disease	C0400966	NOTCH1	4851	P46531	notch receptor 1		693	0.369	0.885	1	0.01		1	1	0	2016	2016
Non-alcoholic Fatty Liver Disease	C0400966	NRF1	4899	Q16656	nuclear respiratory factor 1		74	0.603	0.808	0.99922	0.01		1	1	0	2018	2018
Non-alcoholic Fatty Liver Disease	C0400966	NUCB2	4925	P80303	nucleobindin 2	Calcium-binding protein	140	0.54	0.731	2.0028e-10	0.01		1	1	0	2016	2016
Non-alcoholic Fatty Liver Disease	C0400966	CISD2	493856	Q8N5K1	CDGSH iron sulfur domain 2		106	0.59	0.692	0.41583	0.01		1	1	0	2017	2017
Non-alcoholic Fatty Liver Disease	C0400966	MIR361	494323		microRNA 361		79	0.578	0.654		0.01		1	1	0	2018	2018
Non-alcoholic Fatty Liver Disease	C0400966	MIR423	494335		microRNA 423		91	0.566	0.769		0.01		1	1	0	2017	2017
Non-alcoholic Fatty Liver Disease	C0400966	P2RX5	5026	Q93086	purinergic receptor P2X 5	Ion channel	132	0.548	0.769	2.8546e-13	0.01		1	1	0	2017	2017
Non-alcoholic Fatty Liver Disease	C0400966	P4HA1	5033	P13674	prolyl 4-hydroxylase subunit alpha 1		27	0.736	0.385	0.93166	0.01		1	1	0	2019	2019
Non-alcoholic Fatty Liver Disease	C0400966	DUOX2	50506	Q9NRD8	dual oxidase 2	Enzyme	150	0.533	0.769	4.5032e-56	0.01		1	1	0	2020	2020
Non-alcoholic Fatty Liver Disease	C0400966	NOX4	50507	Q9NPH5	NADPH oxidase 4	Enzyme	260	0.471	0.885	5.7555e-20	0.01		1	1	0	2018	2018
Non-alcoholic Fatty Liver Disease	C0400966	IL20	50604	Q9NYY1	interleukin 20		111	0.556	0.769	1.3447e-06	0.01		1	1	0	2015	2015
Non-alcoholic Fatty Liver Disease	C0400966	PAPPA	5069	Q13219	pappalysin 1		125	0.558	0.692	0.1613	0.01		1	1	0	2020	2020
Non-alcoholic Fatty Liver Disease	C0400966	PC	5091	P11498	pyruvate carboxylase	Enzyme	183	0.515	0.808	0.013834	0.01		1	1	0	2020	2020
Non-alcoholic Fatty Liver Disease	C0400966	SOST	50964	Q9BQB4	sclerostin		270	0.474	0.808	0.86731	0.01		1	1	0	2019	2019
Non-alcoholic Fatty Liver Disease	C0400966	PCK1	5105	P35558	phosphoenolpyruvate carboxykinase 1	Kinase	73	0.608	0.538	8.7476e-15	0.01		1	1	0	2019	2019
Non-alcoholic Fatty Liver Disease	C0400966	ABHD5	51099	Q8WTS1	abhydrolase domain containing 5		76	0.641	0.538	6.4201e-07	0.01		1	1	0	2019	2019
Non-alcoholic Fatty Liver Disease	C0400966	INSIG2	51141	Q9Y5U4	insulin induced gene 2		45	0.653	0.5	0.059986	0.01		1	1	2	2014	2014
Non-alcoholic Fatty Liver Disease	C0400966	MBTPS2	51360	O43462	membrane bound transcription factor peptidase, site 2	Enzyme	205	0.513	0.769	0.99752	0.01		1	1	0	2017	2017
Non-alcoholic Fatty Liver Disease	C0400966	ISYNA1	51477	Q9NPH2	inositol-3-phosphate synthase 1		168	0.51	0.769	2.4934e-05	0.01		1	1	0	2017	2017
Non-alcoholic Fatty Liver Disease	C0400966	SIRT6	51548	Q8N6T7	sirtuin 6	Epigenetic regulator	195	0.496	0.846	0.039119	0.01		1	1	0	2019	2019
Non-alcoholic Fatty Liver Disease	C0400966	PDGFRB	5159	P09619	platelet derived growth factor receptor beta	Kinase	492	0.416	0.846	0.9041	0.01		1	1	0	2019	2019
Non-alcoholic Fatty Liver Disease	C0400966	ARID4B	51742	Q4LE39	AT-rich interaction domain 4B	Transcription factor	62	0.631	0.615	1	0.01		1	1	0	2015	2015
Non-alcoholic Fatty Liver Disease	C0400966	SERPINA4	5267	P29622	serpin family A member 4	Enzyme modulator	45	0.641	0.654	9.7276e-09	0.01		1	1	0	2018	2018
Non-alcoholic Fatty Liver Disease	C0400966	SERPINB6	5269	P35237	serpin family B member 6	Enzyme modulator	128	0.547	0.769	0.00011009	0.01		1	1	0	2018	2018
Non-alcoholic Fatty Liver Disease	C0400966	PIGR	5284	P01833	polymeric immunoglobulin receptor		71	0.615	0.808	0.81331	0.01		1	1	0	2019	2019
Non-alcoholic Fatty Liver Disease	C0400966	PITX3	5309	O75364	paired like homeodomain 3		93	0.585	0.692	0.81276	0.01		1	1	0	2016	2016
Non-alcoholic Fatty Liver Disease	C0400966	PKM	5315	P14618	pyruvate kinase M1/2	Kinase	237	0.482	0.808	0.8549	0.01		1	1	0	2018	2018
Non-alcoholic Fatty Liver Disease	C0400966	PKNOX1	5316	P55347	PBX/knotted 1 homeobox 1	Enzyme	34	0.674	0.538	0.99401	0.01		1	1	0	2018	2018
Non-alcoholic Fatty Liver Disease	C0400966	PLCG1	5335	P19174	phospholipase C gamma 1	Enzyme	116	0.564	0.692	7.9288e-05	0.01		1	1	0	2013	2013
Non-alcoholic Fatty Liver Disease	C0400966	PLG	5340	P00747	plasminogen	Enzyme	586	0.389	0.923	0.010345	0.01		1	1	0	2011	2011
Non-alcoholic Fatty Liver Disease	C0400966	PLTP	5360	P55058	phospholipid transfer protein		62	0.633	0.654	8.9961e-09	0.01		1	1	0	2018	2018
Non-alcoholic Fatty Liver Disease	C0400966	PMCH	5367	P20382	pro-melanin concentrating hormone		57	0.615	0.808	0.11486	0.01		1	1	0	2019	2019
Non-alcoholic Fatty Liver Disease	C0400966	DUOX1	53905	Q9NRD9	dual oxidase 1	Enzyme	97	0.57	0.692	6.2238e-33	0.01		1	1	0	2020	2020
Non-alcoholic Fatty Liver Disease	C0400966	TREM1	54210	Q9NP99	triggering receptor expressed on myeloid cells 1		172	0.515	0.808	0.0062776	0.01		1	1	0	2019	2019
Non-alcoholic Fatty Liver Disease	C0400966	CCHCR1	54535	Q8TD31	coiled-coil alpha-helical rod protein 1		193	0.505	0.808	1.0122e-16	0.01		1	1	0	2019	2019
Non-alcoholic Fatty Liver Disease	C0400966	UGT1A10	54575	Q9HAW8	UDP glucuronosyltransferase family 1 member A10		88	0.588	0.615	4.5886e-19	0.01		1	1	0	2017	2017
Non-alcoholic Fatty Liver Disease	C0400966	UGT1A8	54576	Q9HAW9	UDP glucuronosyltransferase family 1 member A8		90	0.588	0.654	1.3092e-09	0.01		1	1	0	2017	2017
Non-alcoholic Fatty Liver Disease	C0400966	UGT1A7	54577	Q9HAW7	UDP glucuronosyltransferase family 1 member A7		125	0.55	0.692	8.6636e-14	0.01		1	1	0	2017	2017
Non-alcoholic Fatty Liver Disease	C0400966	UGT1A6	54578	P19224	UDP glucuronosyltransferase family 1 member A6		115	0.56	0.654	3.0491e-07	0.01		1	1	0	2017	2017
Non-alcoholic Fatty Liver Disease	C0400966	EGLN1	54583	Q9GZT9	egl-9 family hypoxia inducible factor 1		130	0.54	0.731	0.97403	0.01		1	1	0	2018	2018
Non-alcoholic Fatty Liver Disease	C0400966	UGT1A4	54657	P22310	UDP glucuronosyltransferase family 1 member A4		84	0.595	0.654	5.9807e-07	0.01		1	1	0	2017	2017
Non-alcoholic Fatty Liver Disease	C0400966	CROT	54677	Q9UKG9	carnitine O-octanoyltransferase	Enzyme	11	0.805	0.346	4.4315e-25	0.01		1	1	0	2016	2016
Non-alcoholic Fatty Liver Disease	C0400966	TET2	54790	Q6N021	tet methylcytosine dioxygenase 2		362	0.458	0.808	4.3334e-54	0.01		1	1	1	2015	2015
Non-alcoholic Fatty Liver Disease	C0400966	SLC52A1	55065	Q9NWF4	solute carrier family 52 member 1	Transporter	160	0.526	0.769	3.5163e-06	0.01		1	1	0	2019	2019
Non-alcoholic Fatty Liver Disease	C0400966	PPP1R3C	5507	Q9UQK1	protein phosphatase 1 regulatory subunit 3C	Enzyme modulator	25	0.711	0.5	0.0026397	0.01		1	1	0	2019	2019
Non-alcoholic Fatty Liver Disease	C0400966	PIWIL2	55124	Q8TC59	piwi like RNA-mediated gene silencing 2		65	0.612	0.577	2.7078e-08	0.01		1	1	0	2019	2019
Non-alcoholic Fatty Liver Disease	C0400966	NUDT11	55190	Q96G61	nudix hydrolase 11	Enzyme	37	0.647	0.615	0.10316	0.01		1	1	0	2018	2018
Non-alcoholic Fatty Liver Disease	C0400966	APPL2	55198	Q8NEU8	adaptor protein, phosphotyrosine interacting with PH domain and leucine zipper 2		36	0.7	0.423	1.1641e-18	0.01		1	1	0	2013	2013
Non-alcoholic Fatty Liver Disease	C0400966	SLC47A1	55244	Q96FL8	solute carrier family 47 member 1	Transporter	28	0.729	0.462	1.9605e-14	0.01		1	1	0	2016	2016
Non-alcoholic Fatty Liver Disease	C0400966	CWF19L1	55280	Q69YN2	CWF19 like cell cycle control factor 1		51	0.691	0.346	1.4404e-15	0.01		1	1	0	2013	2013
Non-alcoholic Fatty Liver Disease	C0400966	FBXW7	55294	Q969H0	F-box and WD repeat domain containing 7	Enzyme modulator	257	0.465	0.808	0.99949	0.01		1	1	0	2019	2019
Non-alcoholic Fatty Liver Disease	C0400966	CHDH	55349	Q8NE62	choline dehydrogenase	Enzyme	158	0.529	0.769	1.685e-06	0.01		1	1	0	2019	2019
Non-alcoholic Fatty Liver Disease	C0400966	NLRP2	55655	Q9NX02	NLR family pyrin domain containing 2		155	0.515	0.731	1.4201e-38	0.01		1	1	0	2018	2018
Non-alcoholic Fatty Liver Disease	C0400966	TRERF1	55809	Q96PN7	transcriptional regulating factor 1		22	0.729	0.346	1	0.01		1	1	0	2018	2018
Non-alcoholic Fatty Liver Disease	C0400966	ALLC	55821	Q8N6M5	allantoicase		28	0.695	0.385	4.2324e-16	0.01		1	1	0	2015	2015
Non-alcoholic Fatty Liver Disease	C0400966	PAG1	55824	Q9NWQ8	phosphoprotein membrane anchor with glycosphingolipid microdomains 1		174	0.505	0.808	0.017764	0.01		1	1	0	2019	2019
Non-alcoholic Fatty Liver Disease	C0400966	ACOT13	55856	Q9NPJ3	acyl-CoA thioesterase 13		17	0.729	0.423	3.1271e-06	0.01		1	1	0	2019	2019
Non-alcoholic Fatty Liver Disease	C0400966	PRKDC	5591	P78527	protein kinase, DNA-activated, catalytic subunit	Kinase	131	0.54	0.808	1	0.01		1	1	0	2018	2018
Non-alcoholic Fatty Liver Disease	C0400966	ERBIN	55914	Q96RT1	erbb2 interacting protein		31	0.7	0.231	0.99402	0.01		1	1	0	2018	2018
Non-alcoholic Fatty Liver Disease	C0400966	MAPK3	5595	P27361	mitogen-activated protein kinase 3	Kinase	647	0.379	0.885	0.036884	0.01		1	1	0	2013	2013
Non-alcoholic Fatty Liver Disease	C0400966	MAP2K7	5609	O14733	mitogen-activated protein kinase kinase 7	Kinase	408	0.419	0.808	0.99552	0.01		1	1	0	2019	2019
Non-alcoholic Fatty Liver Disease	C0400966	PRLR	5618	P16471	prolactin receptor	Signaling	110	0.572	0.692	0.98732	0.01		1	1	0	2018	2018
Non-alcoholic Fatty Liver Disease	C0400966	LGALS14	56891	Q8TCE9	galectin 14	Signaling	35	0.695	0.423	0.0002747	0.01		1	1	0	2018	2018
Non-alcoholic Fatty Liver Disease	C0400966	UBQLN4	56893	Q9NRR5	ubiquilin 4		11	0.805	0.308	0.98252	0.01		1	1	0	2017	2017
Non-alcoholic Fatty Liver Disease	C0400966	PNO1	56902	Q9NRX1	partner of NOB1 homolog		99	0.564	0.615	0.22652	0.01		1	1	0	2019	2019
Non-alcoholic Fatty Liver Disease	C0400966	ADAMTS9	56999	Q9P2N4	ADAM metallopeptidase with thrombospondin type 1 motif 9	Enzyme	53	0.633	0.692	1.0004e-06	0.01		1	1	0	2018	2018
Non-alcoholic Fatty Liver Disease	C0400966	BAAT	570	Q14032	bile acid-CoA:amino acid N-acyltransferase		98	0.578	0.654	7.8651e-08	0.01		1	1	0	2020	2020
Non-alcoholic Fatty Liver Disease	C0400966	PCBP4	57060	P57723	poly(rC) binding protein 4	Enzyme	147	0.523	0.808	0.0023713	0.01		1	1	0	2019	2019
Non-alcoholic Fatty Liver Disease	C0400966	SMURF1	57154	Q9HCE7	SMAD specific E3 ubiquitin protein ligase 1	Enzyme	70	0.595	0.615	0.6118	0.01		1	1	0	2018	2018
Non-alcoholic Fatty Liver Disease	C0400966	PTBP1	5725	P26599	polypyrimidine tract binding protein 1		172	0.517	0.769	0.99961	0.01		1	1	0	2019	2019
Non-alcoholic Fatty Liver Disease	C0400966	PTGFRN	5738	Q9P2B2	prostaglandin F2 receptor inhibitor		14	0.76	0.269	0.00047574	0.01		1	1	0	2018	2018
Non-alcoholic Fatty Liver Disease	C0400966	MIR20B	574032		microRNA 20b		84	0.581	0.615		0.01		1	1	0	2018	2018
Non-alcoholic Fatty Liver Disease	C0400966	MIR193B	574455		microRNA 193b		117	0.536	0.808		0.01		1	1	0	2019	2019
Non-alcoholic Fatty Liver Disease	C0400966	LRRC7	57554	Q96NW7	leucine rich repeat containing 7		26	0.722	0.462	1	0.01		1	1	0	2019	2019
Non-alcoholic Fatty Liver Disease	C0400966	SEMA6A	57556	Q9H2E6	semaphorin 6A	Signaling	211	0.486	0.808	0.99976	0.01		1	1	0	2019	2019
Non-alcoholic Fatty Liver Disease	C0400966	ARRDC3	57561	Q96B67	arrestin domain containing 3		24	0.711	0.308	0.98715	0.01		1	1	0	2019	2019
Non-alcoholic Fatty Liver Disease	C0400966	PTPN6	5777	P29350	protein tyrosine phosphatase non-receptor type 6		218	0.485	0.769	0.99999	0.01		1	1	0	2018	2018
Non-alcoholic Fatty Liver Disease	C0400966	PTPRC	5788	P08575	protein tyrosine phosphatase receptor type C	Enzyme	366	0.435	0.808	1	0.01		1	1	0	2018	2018
Non-alcoholic Fatty Liver Disease	C0400966	PTX3	5806	P26022	pentraxin 3		296	0.457	0.808	6.9827e-05	0.01		1	1	0	2016	2016
Non-alcoholic Fatty Liver Disease	C0400966	BAX	581	Q07812	BCL2 associated X, apoptosis regulator	Signaling	420	0.417	0.885	0.31746	0.01		1	1	0	2018	2018
Non-alcoholic Fatty Liver Disease	C0400966	PGAP6	58986	Q9HCN3	post-glycosylphosphatidylinositol attachment to proteins 6	Cell adhesion	3	1	0.038	4.3704e-10	0.01		1	1	0	2019	2019
Non-alcoholic Fatty Liver Disease	C0400966	BCHE	590	P06276	butyrylcholinesterase		392	0.447	0.923	1.0643e-13	0.01		1	1	0	2020	2020
Non-alcoholic Fatty Liver Disease	C0400966	RARA	5914	P10276	retinoic acid receptor alpha	Nuclear receptor	274	0.47	0.846	0.96305	0.01		1	1	0	2019	2019
Non-alcoholic Fatty Liver Disease	C0400966	TRPV4	59341	Q9HBA0	transient receptor potential cation channel subfamily V member 4	Ion channel	422	0.457	0.808	2.237e-16	0.01		1	1	0	2017	2017
Non-alcoholic Fatty Liver Disease	C0400966	OPN1LW	5956	P04000	opsin 1, long wave sensitive	G-protein coupled receptor	197	0.497	0.808	0.97535	0.01		1	1	0	2019	2019
Non-alcoholic Fatty Liver Disease	C0400966	RELA	5970	Q04206	RELA proto-oncogene, NF-kB subunit	Transcription factor	483	0.406	0.885	0.99948	0.01		1	1	0	2019	2019
Non-alcoholic Fatty Liver Disease	C0400966	ACTB	60	P60709	actin beta	Cellular structure	1110	0.325	0.923	0.98564	0.01		1	1	0	2019	2019
Non-alcoholic Fatty Liver Disease	C0400966	RLN2	6019	P04090	relaxin 2	Signaling	54	0.626	0.615	0.00090025	0.01		1	1	0	2019	2019
Non-alcoholic Fatty Liver Disease	C0400966	BRD2	6046	P25440	bromodomain containing 2	Epigenetic regulator	303	0.45	0.808	0.99957	0.01		1	1	0	2019	2019
Non-alcoholic Fatty Liver Disease	C0400966	RPS6KB1	6198	P23443	ribosomal protein S6 kinase B1	Kinase	169	0.511	0.731	0.97285	0.01		1	1	0	2018	2018
Non-alcoholic Fatty Liver Disease	C0400966	SORT1	6272	Q99523	sortilin 1	Transporter	111	0.573	0.615	0.99987	0.01		1	1	0	2017	2017
Non-alcoholic Fatty Liver Disease	C0400966	S100A4	6275	P26447	S100 calcium binding protein A4	Calcium-binding protein	308	0.448	0.769	0.0061838	0.01		1	1	0	2018	2018
Non-alcoholic Fatty Liver Disease	C0400966	CCL5	6352	P13501	C-C motif chemokine ligand 5	Signaling	514	0.403	0.885	0.0017516	0.01		1	1	0	2017	2017
Non-alcoholic Fatty Liver Disease	C0400966	CCL17	6361	Q92583	C-C motif chemokine ligand 17	Signaling	162	0.518	0.808	0.00013932	0.01		1	1	0	2020	2020
Non-alcoholic Fatty Liver Disease	C0400966	CCL19	6363	Q99731	C-C motif chemokine ligand 19	Signaling	126	0.542	0.692	0.31691	0.01		1	1	0	2018	2018
Non-alcoholic Fatty Liver Disease	C0400966	CXCL5	6374	P42830	C-X-C motif chemokine ligand 5	Signaling	160	0.519	0.769	5.0431e-06	0.01		1	1	0	2020	2020
Non-alcoholic Fatty Liver Disease	C0400966	CIDEC	63924	Q96AQ7	cell death inducing DFFA like effector c		43	0.666	0.462	0.0089662	0.01		1	1	0	2017	2017
Non-alcoholic Fatty Liver Disease	C0400966	SELL	6402	P14151	selectin L		171	0.505	0.846	4.9624e-07	0.01		1	1	0	2016	2016
Non-alcoholic Fatty Liver Disease	C0400966	SELP	6403	P16109	selectin P		293	0.46	0.769	5.0448e-32	0.01		1	1	0	2017	2017
Non-alcoholic Fatty Liver Disease	C0400966	SMOC2	64094	Q9H3U7	SPARC related modular calcium binding 2	Calcium-binding protein	42	0.67	0.462	0.0025279	0.01		1	1	0	2019	2019
Non-alcoholic Fatty Liver Disease	C0400966	TMBIM1	64114	Q969X1	transmembrane BAX inhibitor motif containing 1		30	0.711	0.154	1.3647e-08	0.01		1	1	0	2017	2017
Non-alcoholic Fatty Liver Disease	C0400966	SETMAR	6419	Q53H47	SET domain and mariner transposase fusion gene	Epigenetic regulator	61	0.617	0.692	0.00010188	0.01		1	1	0	2018	2018
Non-alcoholic Fatty Liver Disease	C0400966	SFRP4	6424	Q6FHJ7	secreted frizzled related protein 4		155	0.524	0.654	9.2586e-05	0.01		1	1	0	2019	2019
Non-alcoholic Fatty Liver Disease	C0400966	ABCG8	64241	Q9H221	ATP binding cassette subfamily G member 8	Transporter	116	0.573	0.538	2.3838e-20	0.01		1	1	0	2018	2018
Non-alcoholic Fatty Liver Disease	C0400966	SFRP5	6425	Q5T4F7	secreted frizzled related protein 5		106	0.559	0.692	5.1843e-06	0.01		1	1	0	2016	2016
Non-alcoholic Fatty Liver Disease	C0400966	SRSF3	6428	P84103	serine and arginine rich splicing factor 3	Nucleic acid binding	60	0.619	0.615	0.96323	0.01		1	1	0	2019	2019
Non-alcoholic Fatty Liver Disease	C0400966	NSD1	64324	Q96L73	nuclear receptor binding SET domain protein 1	Epigenetic regulator	247	0.505	0.769	1	0.01		1	1	0	2017	2017
Non-alcoholic Fatty Liver Disease	C0400966	XPO4	64328	Q9C0E2	exportin 4	Transporter	17	0.751	0.192	1	0.01		1	1	0	2015	2015
Non-alcoholic Fatty Liver Disease	C0400966	BLVRA	644	P53004	biliverdin reductase A	Enzyme	34	0.663	0.423	0.00034786	0.01		1	1	0	2019	2019
Non-alcoholic Fatty Liver Disease	C0400966	GORASP1	64689	Q9BQQ3	golgi reassembly stacking protein 1		369	0.428	0.846	0.019543	0.01		1	1	0	2019	2019
Non-alcoholic Fatty Liver Disease	C0400966	ARV1	64801	Q9H2C2	ARV1 homolog, fatty acid homeostasis modulator		57	0.691	0.423	3.5867e-06	0.01		1	1	0	2018	2018
Non-alcoholic Fatty Liver Disease	C0400966	ST3GAL4	6484	Q11206	ST3 beta-galactoside alpha-2,3-sialyltransferase 4		115	0.588	0.692	0.039802	0.01		1	1	0	2018	2018
Non-alcoholic Fatty Liver Disease	C0400966	WNK1	65125	Q9H4A3	WNK lysine deficient protein kinase 1	Kinase	460	0.416	0.846	1	0.01		1	1	0	2019	2019
Non-alcoholic Fatty Liver Disease	C0400966	SLC2A4	6517	P14672	solute carrier family 2 member 4	Transporter	158	0.528	0.769	4.7123e-05	0.01		1	1	0	2015	2015
Non-alcoholic Fatty Liver Disease	C0400966	BMP4	652	P12644	bone morphogenetic protein 4	Signaling	423	0.422	0.808	0.9564	0.01		1	1	0	2019	2019
Non-alcoholic Fatty Liver Disease	C0400966	SLC3A2	6520	P08195	solute carrier family 3 member 2	Transporter	108	0.565	0.731	4.2163e-08	0.01		1	1	0	2017	2017
Non-alcoholic Fatty Liver Disease	C0400966	FRTS1	65211		Fanconi renotubular syndrome		69	0.599	0.654		0.01		1	1	0	2020	2020
Non-alcoholic Fatty Liver Disease	C0400966	SLC6A2	6530	P23975	solute carrier family 6 member 2	Transporter	238	0.49	0.846	0.081524	0.01		1	1	1	2017	2017
Non-alcoholic Fatty Liver Disease	C0400966	SNHG20	654434		small nucleolar RNA host gene 20		41	0.65	0.346		0.01		1	1	0	2019	2019
Non-alcoholic Fatty Liver Disease	C0400966	SLC10A1	6554	Q14973	solute carrier family 10 member 1	Transporter	54	0.626	0.462	4.7887e-16	0.01		1	1	0	2016	2016
Non-alcoholic Fatty Liver Disease	C0400966	BMP8B	656	P34820	bone morphogenetic protein 8b	Signaling	12	0.792	0.192	0.0001897	0.01		1	1	0	2019	2019
Non-alcoholic Fatty Liver Disease	C0400966	SLC13A1	6561	Q9BZW2	solute carrier family 13 member 1	Transporter	7	0.861	0.269	1.2291e-17	0.01		1	1	0	2018	2018
Non-alcoholic Fatty Liver Disease	C0400966	AACS	65985	Q86V21	acetoacetyl-CoA synthetase	Enzyme	12	0.751	0.308	9.1275e-17	0.01		1	1	0	2017	2017
Non-alcoholic Fatty Liver Disease	C0400966	SMPD1	6609	P17405	sphingomyelin phosphodiesterase 1	Enzyme	247	0.499	0.885	3.8932e-10	0.01		1	1	0	2014	2014
Non-alcoholic Fatty Liver Disease	C0400966	SIGLEC1	6614	Q9BZZ2	sialic acid binding Ig like lectin 1		75	0.597	0.654	5.3298e-46	0.01		1	1	0	2016	2016
Non-alcoholic Fatty Liver Disease	C0400966	SNAI1	6615	O95863	snail family transcriptional repressor 1		243	0.474	0.808	0.21754	0.01		1	1	0	2018	2018
Non-alcoholic Fatty Liver Disease	C0400966	SORD	6652	Q00796	sorbitol dehydrogenase	Enzyme	113	0.552	0.769	4.4938e-08	0.01		1	1	0	2019	2019
Non-alcoholic Fatty Liver Disease	C0400966	SP1	6667	P08047	Sp1 transcription factor	Nucleic acid binding	209	0.493	0.769	0.99997	0.01		1	1	0	2017	2017
Non-alcoholic Fatty Liver Disease	C0400966	SPRR2A	6700	P35326	small proline rich protein 2A		67	0.612	0.731		0.01		1	1	0	2019	2019
Non-alcoholic Fatty Liver Disease	C0400966	SQLE	6713	Q14534	squalene epoxidase	Enzyme	36	0.674	0.577	0.97594	0.01		1	1	0	2018	2018
Non-alcoholic Fatty Liver Disease	C0400966	AKR1D1	6718	P51857	aldo-keto reductase family 1 member D1	Enzyme	40	0.711	0.385	1.7175e-07	0.01		1	1	0	2019	2019
Non-alcoholic Fatty Liver Disease	C0400966	STAR	6770	P49675	steroidogenic acute regulatory protein		177	0.513	0.808	8.7679e-11	0.01		1	1	0	2017	2017
Non-alcoholic Fatty Liver Disease	C0400966	STAT1	6772	P42224	signal transducer and activator of transcription 1	Nucleic acid binding	531	0.399	0.885	0.99999	0.01		1	1	0	2017	2017
Non-alcoholic Fatty Liver Disease	C0400966	STAT6	6778	P42226	signal transducer and activator of transcription 6	Nucleic acid binding	281	0.475	0.808	0.98849	0.01		1	1	0	2019	2019
Non-alcoholic Fatty Liver Disease	C0400966	SULT1E1	6783	P49888	sulfotransferase family 1E member 1		171	0.508	0.808	1.9701e-07	0.01		1	1	0	2019	2019
Non-alcoholic Fatty Liver Disease	C0400966	STK11	6794	Q15831	serine/threonine kinase 11	Kinase	372	0.435	0.808	0.9934	0.01		1	1	0	2018	2018
Non-alcoholic Fatty Liver Disease	C0400966	SYT1	6857	P21579	synaptotagmin 1	Transporter	460	0.412	0.846	0.60038	0.01		1	1	0	2019	2019
Non-alcoholic Fatty Liver Disease	C0400966	ADAM17	6868	P78536	ADAM metallopeptidase domain 17		316	0.453	0.808	0.99528	0.01		1	1	0	2015	2015
Non-alcoholic Fatty Liver Disease	C0400966	MAP3K7	6885	O43318	mitogen-activated protein kinase kinase kinase 7	Kinase	273	0.477	0.808	0.99971	0.01		1	1	0	2019	2019
Non-alcoholic Fatty Liver Disease	C0400966	TAZ	6901	Q16635	tafazzin	Enzyme	252	0.477	0.808	0.72591	0.01		1	1	0	2018	2018
Non-alcoholic Fatty Liver Disease	C0400966	MIR33B	693120		microRNA 33b		61	0.601	0.615		0.01		1	1	0	2016	2016
Non-alcoholic Fatty Liver Disease	C0400966	MIR590	693175		microRNA 590		99	0.553	0.692		0.01		1	1	0	2019	2019
Non-alcoholic Fatty Liver Disease	C0400966	TCF7L2	6934	Q9NQB0	transcription factor 7 like 2		257	0.485	0.846	0.99537	0.01		1	1	0	2009	2009
Non-alcoholic Fatty Liver Disease	C0400966	TFAM	7019	Q00059	transcription factor A, mitochondrial		147	0.529	0.731	0.17259	0.01		1	1	0	2010	2010
Non-alcoholic Fatty Liver Disease	C0400966	TFF3	7033	Q07654	trefoil factor 3	Signaling	163	0.518	0.885	0.01591	0.01		1	1	0	2019	2019
Non-alcoholic Fatty Liver Disease	C0400966	TG	7038	P01266	thyroglobulin	Enzyme modulator	240	0.48	0.808	2.8802e-59	0.01		1	1	0	2018	2018
Non-alcoholic Fatty Liver Disease	C0400966	TGFB1I1	7041	O43294	transforming growth factor beta 1 induced transcript 1	Cellular structure	47	0.638	0.423	0.027032	0.01		1	1	0	2015	2015
Non-alcoholic Fatty Liver Disease	C0400966	TSPO	706	P30536	translocator protein		341	0.444	0.885	0.00027398	0.01		1	1	0	2019	2019
Non-alcoholic Fatty Liver Disease	C0400966	THRSP	7069	Q92748	thyroid hormone responsive		33	0.695	0.462	0.0029238	0.01		1	1	0	2018	2018
Non-alcoholic Fatty Liver Disease	C0400966	TIMP3	7078	P35625	TIMP metallopeptidase inhibitor 3	Enzyme modulator	325	0.445	0.923	0.63037	0.01		1	1	0	2017	2017
Non-alcoholic Fatty Liver Disease	C0400966	TLL1	7092	O43897	tolloid like 1		24	0.716	0.5	0.17306	0.01		1	1	0	2018	2018
Non-alcoholic Fatty Liver Disease	C0400966	TLR1	7096	Q15399	toll like receptor 1		198	0.496	0.808	5.8704e-23	0.01		1	1	0	2015	2015
Non-alcoholic Fatty Liver Disease	C0400966	NR2E1	7101	Q9Y466	nuclear receptor subfamily 2 group E member 1	Nuclear receptor	57	0.628	0.538	0.99864	0.01		1	1	0	2019	2019
Non-alcoholic Fatty Liver Disease	C0400966	TM7SF2	7108	O76062	transmembrane 7 superfamily member 2	Enzyme	217	0.486	0.808	1.366e-07	0.01		1	1	0	2018	2018
Non-alcoholic Fatty Liver Disease	C0400966	TMPO	7112	P42166;P42167	thymopoietin	Signaling	58	0.631	0.577	1.5453e-07	0.01		1	1	0	2018	2018
Non-alcoholic Fatty Liver Disease	C0400966	TNFAIP3	7128	P21580	TNF alpha induced protein 3	Enzyme	212	0.481	0.808	0.99972	0.01		1	1	0	2018	2018
Non-alcoholic Fatty Liver Disease	C0400966	TNFRSF1A	7132	P19438	TNF receptor superfamily member 1A		487	0.409	0.923	0.9949	0.01		1	1	0	2018	2018
Non-alcoholic Fatty Liver Disease	C0400966	TP53BP1	7158	Q12888	tumor protein p53 binding protein 1	Epigenetic regulator	158	0.52	0.731	0.99985	0.01		1	1	0	2019	2019
Non-alcoholic Fatty Liver Disease	C0400966	TPO	7173	P07202	thyroid peroxidase	Enzyme	306	0.455	0.846	1.8182e-21	0.01		1	1	0	2018	2018
Non-alcoholic Fatty Liver Disease	C0400966	C3	718	P01024	complement C3	Enzyme modulator	343	0.445	0.885	0.90421	0.01		1	1	0	2017	2017
Non-alcoholic Fatty Liver Disease	C0400966	TRAF3	7187	Q13114	TNF receptor associated factor 3	Signaling	129	0.541	0.769	0.99869	0.01		1	1	0	2019	2019
Non-alcoholic Fatty Liver Disease	C0400966	DNLZ	728489	Q5SXM8	DNL-type zinc finger		43	0.663	0.538	0.00024737	0.01		1	1	0	2018	2018
Non-alcoholic Fatty Liver Disease	C0400966	HULC	728655		hepatocellular carcinoma up-regulated long non-coding RNA		72	0.606	0.538		0.01		1	1	0	2019	2019
Non-alcoholic Fatty Liver Disease	C0400966	UCP1	7350	P25874	uncoupling protein 1	Transporter	124	0.545	0.769	1.6903e-11	0.01		1	1	0	2009	2009
Non-alcoholic Fatty Liver Disease	C0400966	UCP3	7352	P55916	uncoupling protein 3	Transporter	66	0.619	0.577	9.5517e-10	0.01		1	1	1	2013	2013
Non-alcoholic Fatty Liver Disease	C0400966	SLC35A2	7355	P78381	solute carrier family 35 member A2	Transporter	197	0.525	0.808	0.71792	0.01		1	1	0	2016	2016
Non-alcoholic Fatty Liver Disease	C0400966	UGT1A	7361		UDP glucuronosyltransferase family 1 member A complex locus		117	0.54	0.654		0.01		1	1	0	2016	2016
Non-alcoholic Fatty Liver Disease	C0400966	UGT2B4	7363	P06133	UDP glucuronosyltransferase family 2 member B4		16	0.751	0.231	4.3777e-09	0.01		1	1	0	2019	2019
Non-alcoholic Fatty Liver Disease	C0400966	USP4	7375	Q13107	ubiquitin specific peptidase 4	Enzyme	40	0.686	0.308	1.6119e-09	0.01		1	1	0	2018	2018
Non-alcoholic Fatty Liver Disease	C0400966	UROD	7389	P06132	uroporphyrinogen decarboxylase		166	0.521	0.769	1.2563e-08	0.01		1	1	0	2017	2017
Non-alcoholic Fatty Liver Disease	C0400966	UTRN	7402	P46939	utrophin		152	0.525	0.692	1.0021e-19	0.01		1	1	0	2018	2018
Non-alcoholic Fatty Liver Disease	C0400966	VCAM1	7412	P19320	vascular cell adhesion molecule 1		406	0.422	0.808	0.79791	0.01		1	1	0	2017	2017
Non-alcoholic Fatty Liver Disease	C0400966	VEGFC	7424	P49767	vascular endothelial growth factor C	Signaling	291	0.459	0.769	0.49565	0.01		1	1	0	2019	2019
Non-alcoholic Fatty Liver Disease	C0400966	VIP	7432	P01282	vasoactive intestinal peptide	Signaling	376	0.437	0.846	0.00041995	0.01		1	1	0	2019	2019
Non-alcoholic Fatty Liver Disease	C0400966	BEST1	7439	O76090	bestrophin 1	Ion channel	292	0.465	0.885	1.8214e-12	0.01		1	1	0	2018	2018
Non-alcoholic Fatty Liver Disease	C0400966	YY1	7528	P25490	YY1 transcription factor	Transcription factor	245	0.481	0.808	0.9938	0.01		1	1	0	2018	2018
Non-alcoholic Fatty Liver Disease	C0400966	ZBTB16	7704	Q05516	zinc finger and BTB domain containing 16	Transcription factor	154	0.545	0.808	0.99907	0.01		1	1	0	2019	2019
Non-alcoholic Fatty Liver Disease	C0400966	DUSP26	78986	Q9BV47	dual specificity phosphatase 26		35	0.682	0.346	0.00023011	0.01		1	1	0	2019	2019
Non-alcoholic Fatty Liver Disease	C0400966	ELOVL6	79071	Q9H5J4	ELOVL fatty acid elongase 6	Enzyme	51	0.623	0.731	0.96581	0.01		1	1	0	2019	2019
Non-alcoholic Fatty Liver Disease	C0400966	APOO	79135	Q9BUR5	apolipoprotein O		6	0.839	0.192	0.60201	0.01		1	1	0	2018	2018
Non-alcoholic Fatty Liver Disease	C0400966	LAP	7939		Laryngeal adductor paralysis		50	0.619	0.731		0.01		1	1	0	2017	2017
Non-alcoholic Fatty Liver Disease	C0400966	PLA2G7	7941	Q13093	phospholipase A2 group VII	Enzyme	136	0.537	0.769	5.3314e-22	0.01		1	1	0	2018	2018
Non-alcoholic Fatty Liver Disease	C0400966	TFEB	7942	P19484	transcription factor EB		150	0.527	0.731	0.89931	0.01		1	1	0	2018	2018
Non-alcoholic Fatty Liver Disease	C0400966	CALCA	796	P01258;P06881	calcitonin related polypeptide alpha	Signaling	467	0.416	0.923	0.015562	0.01		1	1	0	2017	2017
Non-alcoholic Fatty Liver Disease	C0400966	AIMP2	7965	Q13155	aminoacyl tRNA synthetase complex interacting multifunctional protein 2		555	0.393	0.923	0.008024	0.01		1	1	0	2019	2019
Non-alcoholic Fatty Liver Disease	C0400966	NLRX1	79671	Q86UT6	NLR family member X1	Enzyme	51	0.641	0.654	7.7345e-31	0.01		1	1	0	2018	2018
Non-alcoholic Fatty Liver Disease	C0400966	KCTD17	79734	Q8N5Z5	potassium channel tetramerization domain containing 17		22	0.743	0.308	0.017683	0.01		1	1	0	2017	2017
Non-alcoholic Fatty Liver Disease	C0400966	GSDMD	79792	P57764	gasdermin D		50	0.641	0.692	1.0789e-13	0.01		1	1	0	2018	2018
Non-alcoholic Fatty Liver Disease	C0400966	DHDDS	79947	Q86SQ9	dehydrodolichyl diphosphate synthase subunit	Enzyme	308	0.468	0.885	0.24533	0.01		1	1	0	2020	2020
Non-alcoholic Fatty Liver Disease	C0400966	HKDC1	80201	Q2TB90	hexokinase domain containing 1	Kinase	26	0.743	0.269	1.6205e-14	0.01		1	1	0	2019	2019
Non-alcoholic Fatty Liver Disease	C0400966	STAM	8027	Q92783	signal transducing adaptor molecule		20	0.736	0.269	0.85048	0.01		1	1	0	2019	2019
Non-alcoholic Fatty Liver Disease	C0400966	CPEB4	80315	Q17RY0	cytoplasmic polyadenylation element binding protein 4	Nucleic acid binding	70	0.621	0.462	0.98555	0.01		1	1	0	2017	2017
Non-alcoholic Fatty Liver Disease	C0400966	COASY	80347	Q13057	Coenzyme A synthase	Enzyme	125	0.551	0.654	8.0903e-10	0.01		0	1	0	2019	2019
Non-alcoholic Fatty Liver Disease	C0400966	FOSL1	8061	P15407	FOS like 1, AP-1 transcription factor subunit	Transcription factor	150	0.519	0.846	0.15849	0.01		1	1	0	2014	2014
Non-alcoholic Fatty Liver Disease	C0400966	FGF23	8074	Q9GZV9	fibroblast growth factor 23	Signaling	305	0.46	0.731	0.031014	0.01		1	1	0	2018	2018
Non-alcoholic Fatty Liver Disease	C0400966	SPX	80763	Q9BT56	spexin hormone		33	0.695	0.462	0.00011029	0.01		1	1	0	2016	2016
Non-alcoholic Fatty Liver Disease	C0400966	SLC7A5	8140	Q01650	solute carrier family 7 member 5	Transporter	173	0.513	0.808	0.23505	0.01		1	1	0	2017	2017
Non-alcoholic Fatty Liver Disease	C0400966	BAS	8213		Beta-adrenergic stimulation, response to		29	0.711	0.346		0.01		0	1	0	2013	2013
Non-alcoholic Fatty Liver Disease	C0400966	SESN2	83667	P58004	sestrin 2	Enzyme	169	0.508	0.808	4.1912e-07	0.01		1	1	0	2017	2017
Non-alcoholic Fatty Liver Disease	C0400966	TRAPPC9	83696	Q96Q05	trafficking protein particle complex 9		111	0.603	0.577	2.2898e-14	0.01		1	1	1	2017	2017
Non-alcoholic Fatty Liver Disease	C0400966	ITCH	83737	Q96J02	itchy E3 ubiquitin protein ligase	Enzyme	123	0.556	0.769	0.99997	0.01		1	1	0	2014	2014
Non-alcoholic Fatty Liver Disease	C0400966	ANGPTL6	83854	Q8NI99	angiopoietin like 6	Signaling	48	0.656	0.462	2.3705e-08	0.01		1	1	0	2018	2018
Non-alcoholic Fatty Liver Disease	C0400966	PLA2G6	8398	O60733	phospholipase A2 group VI	Enzyme modulator	350	0.476	0.846	2.4837e-10	0.01		1	1	0	2019	2019
Non-alcoholic Fatty Liver Disease	C0400966	CHCHD6	84303	Q9BRQ6	coiled-coil-helix-coiled-coil-helix domain containing 6		7	0.839	0.269	5.5744e-09	0.01		1	1	0	2018	2018
Non-alcoholic Fatty Liver Disease	C0400966	MAK16	84549	Q9BXY0	MAK16 homolog		96	0.566	0.615	0.96452	0.01		1	1	0	2019	2019
Non-alcoholic Fatty Liver Disease	C0400966	DGAT2	84649	Q96PD7	diacylglycerol O-acyltransferase 2	Enzyme	41	0.686	0.423	8.3643e-12	0.01		1	1	0	2019	2019
Non-alcoholic Fatty Liver Disease	C0400966	CARD6	84674	Q9BX69	caspase recruitment domain family member 6		6	0.861	0.115	3.3903e-13	0.01		1	1	0	2018	2018
Non-alcoholic Fatty Liver Disease	C0400966	FAM83A	84985	Q86UY5	family with sequence similarity 83 member A		20	0.76	0.192	3.0324e-07	0.01		1	1	0	2017	2017
Non-alcoholic Fatty Liver Disease	C0400966	PIK3R3	8503	Q92569	phosphoinositide-3-kinase regulatory subunit 3	Enzyme modulator	101	0.556	0.692	3.3583e-10	0.01		1	1	0	2018	2018
Non-alcoholic Fatty Liver Disease	C0400966	CYP4F2	8529	P78329	cytochrome P450 family 4 subfamily F member 2	Enzyme	44	0.674	0.308	7.5803e-17	0.01		1	1	0	2014	2014
Non-alcoholic Fatty Liver Disease	C0400966	DENR	8562	O43583	density regulated re-initiation and release factor	Enzyme	121	0.543	0.692	0.87514	0.01		1	1	0	2018	2018
Non-alcoholic Fatty Liver Disease	C0400966	RUNX2	860	Q13950	RUNX family transcription factor 2	Transcription factor	405	0.437	0.846	0.94884	0.01		1	1	0	2019	2019
Non-alcoholic Fatty Liver Disease	C0400966	RTCA	8634	O00442	RNA 3'-terminal phosphate cyclase	Enzyme	22	0.736	0.385	3.0927e-09	0.01		1	1	0	2019	2019
Non-alcoholic Fatty Liver Disease	C0400966	DGAT1	8694	O75907	diacylglycerol O-acyltransferase 1	Enzyme	64	0.621	0.615	1.4082e-17	0.01		1	1	0	2007	2007
Non-alcoholic Fatty Liver Disease	C0400966	ABCC3	8714	O15438	ATP binding cassette subfamily C member 3	Transporter	160	0.517	0.769	1.2092e-26	0.01		1	1	0	2017	2017
Non-alcoholic Fatty Liver Disease	C0400966	MBTPS1	8720	Q14703	membrane bound transcription factor peptidase, site 1	Enzyme	148	0.532	0.692	7.5901e-09	0.01		1	1	0	2017	2017
Non-alcoholic Fatty Liver Disease	C0400966	TNFSF14	8740	O43557	TNF superfamily member 14	Signaling	143	0.529	0.769	0.051663	0.01		1	1	0	2019	2019
Non-alcoholic Fatty Liver Disease	C0400966	DLK1	8788	P80370	delta like non-canonical Notch ligand 1	Signaling	144	0.527	0.692	0.034576	0.01		1	1	0	2016	2016
Non-alcoholic Fatty Liver Disease	C0400966	TRIM24	8805	O15164	tripartite motif containing 24		79	0.581	0.615	1	0.01		1	1	0	2015	2015
Non-alcoholic Fatty Liver Disease	C0400966	CES2	8824	O00748	carboxylesterase 2	Enzyme	87	0.584	0.731	3.5781e-16	0.01		1	1	0	2016	2016
Non-alcoholic Fatty Liver Disease	C0400966	HDAC3	8841	O15379	histone deacetylase 3	Epigenetic regulator	179	0.511	0.731	0.56737	0.01		1	1	0	2019	2019
Non-alcoholic Fatty Liver Disease	C0400966	SQSTM1	8878	Q13501	sequestosome 1		470	0.428	0.885	0.00086035	0.01		1	1	0	2019	2019
Non-alcoholic Fatty Liver Disease	C0400966	CCNC	892	P24863	cyclin C	Enzyme modulator	24	0.695	0.462	0.99914	0.01		1	1	0	2015	2015
Non-alcoholic Fatty Liver Disease	C0400966	MBD2	8932	Q9UBB5	methyl-CpG binding domain protein 2	Epigenetic regulator	256	0.466	0.846	0.34957	0.01		1	1	0	2018	2018
Non-alcoholic Fatty Liver Disease	C0400966	WNT3A	89780	P56704	Wnt family member 3A	Signaling	141	0.532	0.769	0.96491	0.01		1	1	0	2016	2016
Non-alcoholic Fatty Liver Disease	C0400966	CCRL2	9034	O00421	C-C motif chemokine receptor like 2	G-protein coupled receptor	59	0.621	0.654	0.36861	0.01		1	1	0	2017	2017
Non-alcoholic Fatty Liver Disease	C0400966	TBL1Y	90665	Q9BQ87	transducin beta like 1 Y-linked		22	0.705	0.385	4.03e-13	0.01		1	1	0	2017	2017
Non-alcoholic Fatty Liver Disease	C0400966	MYOM2	9172	P54296	myomesin 2		103	0.57	0.692	7.0086e-85	0.01		1	1	0	2015	2015
Non-alcoholic Fatty Liver Disease	C0400966	TIMD4	91937	Q96H15	T cell immunoglobulin and mucin domain containing 4		49	0.644	0.654	2.6444e-10	0.01		1	1	0	2019	2019
Non-alcoholic Fatty Liver Disease	C0400966	ZNF300	91975	Q96RE9	zinc finger protein 300		16	0.76	0.115	1.1172e-05	0.01		1	1	0	2019	2019
Non-alcoholic Fatty Liver Disease	C0400966	HACD1	9200	B0YJ81	3-hydroxyacyl-CoA dehydratase 1		160	0.539	0.846	1.2914e-09	0.01		1	1	0	2018	2018
Non-alcoholic Fatty Liver Disease	C0400966	NOG	9241	Q13253	noggin		206	0.518	0.731	0.89026	0.01		1	1	0	2018	2018
Non-alcoholic Fatty Liver Disease	C0400966	GLP2R	9340	O95838	glucagon like peptide 2 receptor	G-protein coupled receptor	28	0.705	0.269	2.635e-11	0.01		1	1	0	2019	2019
Non-alcoholic Fatty Liver Disease	C0400966	COX5A	9377	P20674	cytochrome c oxidase subunit 5A	Enzyme	171	0.515	0.846	0.49407	0.01		1	1	0	2017	2017
Non-alcoholic Fatty Liver Disease	C0400966	GRAP2	9402	O75791	GRB2 related adaptor protein 2		538	0.394	0.923	0.00015256	0.01		1	1	0	2019	2019
Non-alcoholic Fatty Liver Disease	C0400966	TMPRSS11D	9407	O60235	transmembrane serine protease 11D	Enzyme	48	0.636	0.538	1.1964e-05	0.01		1	1	0	2019	2019
Non-alcoholic Fatty Liver Disease	C0400966	EIF2AK3	9451	Q9NZJ5	eukaryotic translation initiation factor 2 alpha kinase 3	Kinase	231	0.501	0.808	0.0027603	0.01		1	1	0	2019	2019
Non-alcoholic Fatty Liver Disease	C0400966	GGPS1	9453	O95749	geranylgeranyl diphosphate synthase 1		44	0.647	0.577	0.26866	0.01		1	1	0	2018	2018
Non-alcoholic Fatty Liver Disease	C0400966	ATG5	9474	Q9H1Y0	autophagy related 5	Transporter	282	0.462	0.885	0.97758	0.01		1	1	0	2019	2019
Non-alcoholic Fatty Liver Disease	C0400966	LITAF	9516	Q99732	lipopolysaccharide induced TNF factor	Transcription factor	59	0.65	0.462	0.030752	0.01		1	1	0	2015	2015
Non-alcoholic Fatty Liver Disease	C0400966	CLOCK	9575	O15516	clock circadian regulator		309	0.463	0.885	0.99957	0.01		1	1	5	2007	2007
Non-alcoholic Fatty Liver Disease	C0400966	CD44	960	P16070	CD44 molecule (Indian blood group)		711	0.363	0.962	2.4476e-07	0.01		1	1	0	2017	2017
Non-alcoholic Fatty Liver Disease	C0400966	ABCG1	9619	P45844	ATP binding cassette subfamily G member 1	Transporter	118	0.56	0.692	0.11182	0.01		1	1	0	2016	2016
Non-alcoholic Fatty Liver Disease	C0400966	KEAP1	9817	Q14145	kelch like ECH associated protein 1		251	0.475	0.808	0.00038766	0.01		1	1	0	2020	2020
Non-alcoholic Fatty Liver Disease	C0400966	PLPPR4	9890	Q7Z2D5	phospholipid phosphatase related 4	Enzyme	10	0.839	0.154	0.86104	0.01		1	1	0	2013	2013
Non-alcoholic Fatty Liver Disease	C0400966	MFN2	9927	O95140	mitofusin 2	Enzyme	334	0.471	0.846	0.99415	0.01		1	1	0	2019	2019
Non-alcoholic Fatty Liver Disease	C0400966	CDC42	998	P60953	cell division cycle 42	Enzyme modulator	327	0.458	0.846	0.78728	0.01		1	1	0	2017	2017
Non-alcoholic Fatty Liver Disease	C0400966	CDH1	999	P12830	cadherin 1		508	0.401	0.808	0.14631	0.01		1	1	0	2019	2019

## Sheet: GeneCards
Gene Symbol	Description	Category	Gifts	GC Id	Relevance score	GeneCards Link
PNPLA3	Patatin Like Phospholipase Domain Containing 3	Protein Coding	40	GC22P043923	112.659	https://www.genecards.org/cgi-bin/carddisp.pl?gene=PNPLA3
PRMT7	Protein Arginine Methyltransferase 7	Protein Coding	44	GC16P068368	99.8601	https://www.genecards.org/cgi-bin/carddisp.pl?gene=PRMT7
NAFLD2	Fatty Liver Disease, Nonalcoholic, Susceptibility To, 2	Genetic Locus	1	GC11U901533	93.7898	https://www.genecards.org/cgi-bin/carddisp.pl?gene=NAFLD2
IL6	Interleukin 6	Protein Coding	48	GC07P022725	91.4139	https://www.genecards.org/cgi-bin/carddisp.pl?gene=IL6
APOE	Apolipoprotein E	Protein Coding	50	GC19P044906	91.2501	https://www.genecards.org/cgi-bin/carddisp.pl?gene=APOE
TP53	Tumor Protein P53	Protein Coding	52	GC17M007661	89.938	https://www.genecards.org/cgi-bin/carddisp.pl?gene=TP53
NAFLD1	Fatty Liver Disease 1, Susceptiblity To	Genetic Locus	1	GC22U901005	89.209	https://www.genecards.org/cgi-bin/carddisp.pl?gene=NAFLD1
TNF	Tumor Necrosis Factor	Protein Coding	50	GC06P058308	88.3556	https://www.genecards.org/cgi-bin/carddisp.pl?gene=TNF
MIR122	MicroRNA 122	RNA Gene	22	GC18P058451	82.9395	https://www.genecards.org/cgi-bin/carddisp.pl?gene=MIR122
INS	Insulin	Protein Coding	47	GC11M002159	82.4097	https://www.genecards.org/cgi-bin/carddisp.pl?gene=INS
HFE	Homeostatic Iron Regulator	Protein Coding	43	GC06P026087	81.6441	https://www.genecards.org/cgi-bin/carddisp.pl?gene=HFE
HADHA	Hydroxyacyl-CoA Dehydrogenase Trifunctional Multienzyme Complex Subunit Alpha	Protein Coding	46	GC02M026190	77.8493	https://www.genecards.org/cgi-bin/carddisp.pl?gene=HADHA
ALB	Albumin	Protein Coding	49	GC04P073397	76.5475	https://www.genecards.org/cgi-bin/carddisp.pl?gene=ALB
IL10	Interleukin 10	Protein Coding	46	GC01M206767	75.2512	https://www.genecards.org/cgi-bin/carddisp.pl?gene=IL10
PPARG	Peroxisome Proliferator Activated Receptor Gamma	Protein Coding	52	GC03P012287	74.6375	https://www.genecards.org/cgi-bin/carddisp.pl?gene=PPARG
LMNA	Lamin A/C	Protein Coding	48	GC01P156082	73.4589	https://www.genecards.org/cgi-bin/carddisp.pl?gene=LMNA
MARS1	Methionyl-TRNA Synthetase 1	Protein Coding	36	GC12P057476	72.9501	https://www.genecards.org/cgi-bin/carddisp.pl?gene=MARS1
GANAB	Glucosidase II Alpha Subunit	Protein Coding	45	GC11M071504	71.8704	https://www.genecards.org/cgi-bin/carddisp.pl?gene=GANAB
TGFB1	Transforming Growth Factor Beta 1	Protein Coding	51	GC19M041301	71.0157	https://www.genecards.org/cgi-bin/carddisp.pl?gene=TGFB1
ATP7B	ATPase Copper Transporting Beta	Protein Coding	48	GC13M051930	69.9297	https://www.genecards.org/cgi-bin/carddisp.pl?gene=ATP7B
SMPD1	Sphingomyelin Phosphodiesterase 1	Protein Coding	47	GC11P006390	69.4784	https://www.genecards.org/cgi-bin/carddisp.pl?gene=SMPD1
SLC17A5	Solute Carrier Family 17 Member 5	Protein Coding	44	GC06M073593	69.3668	https://www.genecards.org/cgi-bin/carddisp.pl?gene=SLC17A5
FABP1	Fatty Acid Binding Protein 1	Protein Coding	43	GC02M088122	68.3552	https://www.genecards.org/cgi-bin/carddisp.pl?gene=FABP1
SERPINA1	Serpin Family A Member 1	Protein Coding	48	GC14M094376	66.4458	https://www.genecards.org/cgi-bin/carddisp.pl?gene=SERPINA1
FASN	Fatty Acid Synthase	Protein Coding	49	GC17M082078	65.624	https://www.genecards.org/cgi-bin/carddisp.pl?gene=FASN
GPT	Glutamic--Pyruvic Transaminase	Protein Coding	41	GC08P144502	62.8903	https://www.genecards.org/cgi-bin/carddisp.pl?gene=GPT
FAS	Fas Cell Surface Death Receptor	Protein Coding	50	GC10P088969	62.2969	https://www.genecards.org/cgi-bin/carddisp.pl?gene=FAS
SQSTM1	Sequestosome 1	Protein Coding	48	GC05P179806	62.2912	https://www.genecards.org/cgi-bin/carddisp.pl?gene=SQSTM1
CTNNB1	Catenin Beta 1	Protein Coding	53	GC03P041236	62.2776	https://www.genecards.org/cgi-bin/carddisp.pl?gene=CTNNB1
MIR21	MicroRNA 21	RNA Gene	24	GC17P059841	62.2676	https://www.genecards.org/cgi-bin/carddisp.pl?gene=MIR21
APOB	Apolipoprotein B	Protein Coding	45	GC02M020956	61.9425	https://www.genecards.org/cgi-bin/carddisp.pl?gene=APOB
ABCB11	ATP Binding Cassette Subfamily B Member 11	Protein Coding	46	GC02M168922	60.547	https://www.genecards.org/cgi-bin/carddisp.pl?gene=ABCB11
IL1B	Interleukin 1 Beta	Protein Coding	47	GC02M112829	60.2132	https://www.genecards.org/cgi-bin/carddisp.pl?gene=IL1B
CPT1A	Carnitine Palmitoyltransferase 1A	Protein Coding	49	GC11M068754	59.9359	https://www.genecards.org/cgi-bin/carddisp.pl?gene=CPT1A
APOA1	Apolipoprotein A1	Protein Coding	48	GC11M116835	59.3242	https://www.genecards.org/cgi-bin/carddisp.pl?gene=APOA1
PIK3CA	Phosphatidylinositol-4,5-Bisphosphate 3-Kinase Catalytic Subunit Alpha	Protein Coding	53	GC03P179148	58.9171	https://www.genecards.org/cgi-bin/carddisp.pl?gene=PIK3CA
G6PC1	Glucose-6-Phosphatase Catalytic Subunit 1	Protein Coding	36	GC17P045036	58.5606	https://www.genecards.org/cgi-bin/carddisp.pl?gene=G6PC1
LIPA	Lipase A, Lysosomal Acid Type	Protein Coding	48	GC10M089213	58.3089	https://www.genecards.org/cgi-bin/carddisp.pl?gene=LIPA
APP	Amyloid Beta Precursor Protein	Protein Coding	51	GC21M025880	57.9771	https://www.genecards.org/cgi-bin/carddisp.pl?gene=APP
PPARA	Peroxisome Proliferator Activated Receptor Alpha	Protein Coding	46	GC22P046150	57.7946	https://www.genecards.org/cgi-bin/carddisp.pl?gene=PPARA
ADIPOQ	Adiponectin, C1Q And Collagen Domain Containing	Protein Coding	44	GC03P186842	57.6177	https://www.genecards.org/cgi-bin/carddisp.pl?gene=ADIPOQ
TLR4	Toll Like Receptor 4	Protein Coding	50	GC09P117704	55.9205	https://www.genecards.org/cgi-bin/carddisp.pl?gene=TLR4
MIR34A	MicroRNA 34a	RNA Gene	23	GC01M009151	55.8744	https://www.genecards.org/cgi-bin/carddisp.pl?gene=MIR34A
CRP	C-Reactive Protein	Protein Coding	45	GC01M159720	54.8221	https://www.genecards.org/cgi-bin/carddisp.pl?gene=CRP
LPL	Lipoprotein Lipase	Protein Coding	49	GC08P019901	54.6501	https://www.genecards.org/cgi-bin/carddisp.pl?gene=LPL
MIR17	MicroRNA 17	RNA Gene	22	GC13P091350	54.6225	https://www.genecards.org/cgi-bin/carddisp.pl?gene=MIR17
NR1H4	Nuclear Receptor Subfamily 1 Group H Member 4	Protein Coding	48	GC12P100473	54.2771	https://www.genecards.org/cgi-bin/carddisp.pl?gene=NR1H4
KRT18	Keratin 18	Protein Coding	48	GC12P052948	54.2214	https://www.genecards.org/cgi-bin/carddisp.pl?gene=KRT18
VCP	Valosin Containing Protein	Protein Coding	49	GC09M035056	52.8176	https://www.genecards.org/cgi-bin/carddisp.pl?gene=VCP
ACADM	Acyl-CoA Dehydrogenase Medium Chain	Protein Coding	46	GC01P075724	52.7412	https://www.genecards.org/cgi-bin/carddisp.pl?gene=ACADM
MIR155	MicroRNA 155	RNA Gene	19	GC21P025573	52.0569	https://www.genecards.org/cgi-bin/carddisp.pl?gene=MIR155
PTEN	Phosphatase And Tensin Homolog	Protein Coding	52	GC10P087863	52.0385	https://www.genecards.org/cgi-bin/carddisp.pl?gene=PTEN
AKT1	AKT Serine/Threonine Kinase 1	Protein Coding	53	GC14M104769	51.973	https://www.genecards.org/cgi-bin/carddisp.pl?gene=AKT1
F2	Coagulation Factor II, Thrombin	Protein Coding	48	GC11P046720	51.847	https://www.genecards.org/cgi-bin/carddisp.pl?gene=F2
MIR10B	MicroRNA 10b	RNA Gene	22	GC02P176150	51.7172	https://www.genecards.org/cgi-bin/carddisp.pl?gene=MIR10B
CXCL8	C-X-C Motif Chemokine Ligand 8	Protein Coding	40	GC04P073740	51.604	https://www.genecards.org/cgi-bin/carddisp.pl?gene=CXCL8
CYP2E1	Cytochrome P450 Family 2 Subfamily E Member 1	Protein Coding	45	GC10P133520	51.1622	https://www.genecards.org/cgi-bin/carddisp.pl?gene=CYP2E1
PRNP	Prion Protein	Protein Coding	46	GC20P004686	50.9088	https://www.genecards.org/cgi-bin/carddisp.pl?gene=PRNP
LEP	Leptin	Protein Coding	47	GC07P128241	50.7584	https://www.genecards.org/cgi-bin/carddisp.pl?gene=LEP
CFTR	CF Transmembrane Conductance Regulator	Protein Coding	51	GC07P117287	50.724	https://www.genecards.org/cgi-bin/carddisp.pl?gene=CFTR
GGT1	Gamma-Glutamyltransferase 1	Protein Coding	48	GC22P024583	50.6139	https://www.genecards.org/cgi-bin/carddisp.pl?gene=GGT1
SLC25A13	Solute Carrier Family 25 Member 13	Protein Coding	47	GC07M096120	50.4193	https://www.genecards.org/cgi-bin/carddisp.pl?gene=SLC25A13
CD36	CD36 Molecule	Protein Coding	48	GC07P080369	50.386	https://www.genecards.org/cgi-bin/carddisp.pl?gene=CD36
IFNG	Interferon Gamma	Protein Coding	47	GC12M068154	50.2418	https://www.genecards.org/cgi-bin/carddisp.pl?gene=IFNG
ACOX1	Acyl-CoA Oxidase 1	Protein Coding	46	GC17M075941	49.8456	https://www.genecards.org/cgi-bin/carddisp.pl?gene=ACOX1
HNF4A	Hepatocyte Nuclear Factor 4 Alpha	Protein Coding	51	GC20P044355	49.8271	https://www.genecards.org/cgi-bin/carddisp.pl?gene=HNF4A
FABP4	Fatty Acid Binding Protein 4	Protein Coding	44	GC08M081478	49.2839	https://www.genecards.org/cgi-bin/carddisp.pl?gene=FABP4
SREBF1	Sterol Regulatory Element Binding Transcription Factor 1	Protein Coding	45	GC17M017810	49.0843	https://www.genecards.org/cgi-bin/carddisp.pl?gene=SREBF1
TERT	Telomerase Reverse Transcriptase	Protein Coding	51	GC05M001253	49.049	https://www.genecards.org/cgi-bin/carddisp.pl?gene=TERT
MIR146A	MicroRNA 146a	RNA Gene	23	GC05P160485	48.7548	https://www.genecards.org/cgi-bin/carddisp.pl?gene=MIR146A
ACE	Angiotensin I Converting Enzyme	Protein Coding	50	GC17P063477	48.6867	https://www.genecards.org/cgi-bin/carddisp.pl?gene=ACE
MTTP	Microsomal Triglyceride Transfer Protein	Protein Coding	45	GC04P099563	48.1966	https://www.genecards.org/cgi-bin/carddisp.pl?gene=MTTP
HNF1A	HNF1 Homeobox A	Protein Coding	45	GC12P120978	48.0439	https://www.genecards.org/cgi-bin/carddisp.pl?gene=HNF1A
HLA-DQB1	Major Histocompatibility Complex, Class II, DQ Beta 1	Protein Coding	43	GC06M049175	47.8706	https://www.genecards.org/cgi-bin/carddisp.pl?gene=HLA-DQB1
INSR	Insulin Receptor	Protein Coding	53	GC19M007112	47.5786	https://www.genecards.org/cgi-bin/carddisp.pl?gene=INSR
FABP2	Fatty Acid Binding Protein 2	Protein Coding	42	GC04M119317	47.2744	https://www.genecards.org/cgi-bin/carddisp.pl?gene=FABP2
CYBB	Cytochrome B-245 Beta Chain	Protein Coding	47	GC0XP037780	47.0297	https://www.genecards.org/cgi-bin/carddisp.pl?gene=CYBB
NR1H3	Nuclear Receptor Subfamily 1 Group H Member 3	Protein Coding	47	GC11P047248	46.5986	https://www.genecards.org/cgi-bin/carddisp.pl?gene=NR1H3
EGFR	Epidermal Growth Factor Receptor	Protein Coding	53	GC07P055019	46.1181	https://www.genecards.org/cgi-bin/carddisp.pl?gene=EGFR
STAT3	Signal Transducer And Activator Of Transcription 3	Protein Coding	52	GC17M042313	45.5729	https://www.genecards.org/cgi-bin/carddisp.pl?gene=STAT3
MAPT	Microtubule Associated Protein Tau	Protein Coding	50	GC17P045894	45.4651	https://www.genecards.org/cgi-bin/carddisp.pl?gene=MAPT
NPC2	NPC Intracellular Cholesterol Transporter 2	Protein Coding	41	GC14M074476	45.1735	https://www.genecards.org/cgi-bin/carddisp.pl?gene=NPC2
SERPINE1	Serpin Family E Member 1	Protein Coding	50	GC07P101127	45.1329	https://www.genecards.org/cgi-bin/carddisp.pl?gene=SERPINE1
TTR	Transthyretin	Protein Coding	48	GC18P031557	44.9162	https://www.genecards.org/cgi-bin/carddisp.pl?gene=TTR
AFP	Alpha Fetoprotein	Protein Coding	45	GC04P073431	44.6958	https://www.genecards.org/cgi-bin/carddisp.pl?gene=AFP
RBP4	Retinol Binding Protein 4	Protein Coding	44	GC10M093591	44.6235	https://www.genecards.org/cgi-bin/carddisp.pl?gene=RBP4
HBB	Hemoglobin Subunit Beta	Protein Coding	45	GC11M005462	44.3317	https://www.genecards.org/cgi-bin/carddisp.pl?gene=HBB
DNAJB11	DnaJ Heat Shock Protein Family (Hsp40) Member B11	Protein Coding	40	GC03P186567	43.0789	https://www.genecards.org/cgi-bin/carddisp.pl?gene=DNAJB11
SOD1	Superoxide Dismutase 1	Protein Coding	51	GC21P031659	42.7123	https://www.genecards.org/cgi-bin/carddisp.pl?gene=SOD1
IGF1	Insulin Like Growth Factor 1	Protein Coding	49	GC12M102395	42.5597	https://www.genecards.org/cgi-bin/carddisp.pl?gene=IGF1
YARS1	Tyrosyl-TRNA Synthetase 1	Protein Coding	36	GC01M032776	42.3387	https://www.genecards.org/cgi-bin/carddisp.pl?gene=YARS1
VEGFA	Vascular Endothelial Growth Factor A	Protein Coding	48	GC06P043770	42.1585	https://www.genecards.org/cgi-bin/carddisp.pl?gene=VEGFA
PARK7	Parkinsonism Associated Deglycase	Protein Coding	45	GC01P008025	42.0026	https://www.genecards.org/cgi-bin/carddisp.pl?gene=PARK7
HMOX1	Heme Oxygenase 1	Protein Coding	52	GC22P035380	41.989	https://www.genecards.org/cgi-bin/carddisp.pl?gene=HMOX1
CCL2	C-C Motif Chemokine Ligand 2	Protein Coding	48	GC17P034255	41.9872	https://www.genecards.org/cgi-bin/carddisp.pl?gene=CCL2
MTHFR	Methylenetetrahydrofolate Reductase	Protein Coding	48	GC01M011785	41.4469	https://www.genecards.org/cgi-bin/carddisp.pl?gene=MTHFR
FADS1	Fatty Acid Desaturase 1	Protein Coding	44	GC11M061799	41.3793	https://www.genecards.org/cgi-bin/carddisp.pl?gene=FADS1
GARS1	Glycyl-TRNA Synthetase 1	Protein Coding	36	GC07P030580	41.2542	https://www.genecards.org/cgi-bin/carddisp.pl?gene=GARS1
MIR27A	MicroRNA 27a	RNA Gene	23	GC19M014149	41.1952	https://www.genecards.org/cgi-bin/carddisp.pl?gene=MIR27A
TLR2	Toll Like Receptor 2	Protein Coding	50	GC04P153684	41.1355	https://www.genecards.org/cgi-bin/carddisp.pl?gene=TLR2
HSPB1	Heat Shock Protein Family B (Small) Member 1	Protein Coding	51	GC07P076302	41.0646	https://www.genecards.org/cgi-bin/carddisp.pl?gene=HSPB1
FADS2	Fatty Acid Desaturase 2	Protein Coding	44	GC11P061792	41.0185	https://www.genecards.org/cgi-bin/carddisp.pl?gene=FADS2
LDLR	Low Density Lipoprotein Receptor	Protein Coding	49	GC19P011091	40.8768	https://www.genecards.org/cgi-bin/carddisp.pl?gene=LDLR
SCD	Stearoyl-CoA Desaturase	Protein Coding	48	GC10P100347	40.71	https://www.genecards.org/cgi-bin/carddisp.pl?gene=SCD
MIR29A	MicroRNA 29a	RNA Gene	22	GC07M130876	40.5992	https://www.genecards.org/cgi-bin/carddisp.pl?gene=MIR29A
CYP3A4	Cytochrome P450 Family 3 Subfamily A Member 4	Protein Coding	51	GC07M099759	40.5948	https://www.genecards.org/cgi-bin/carddisp.pl?gene=CYP3A4
IL1A	Interleukin 1 Alpha	Protein Coding	43	GC02M112773	40.2893	https://www.genecards.org/cgi-bin/carddisp.pl?gene=IL1A
SMAD4	SMAD Family Member 4	Protein Coding	50	GC18P051028	40.279	https://www.genecards.org/cgi-bin/carddisp.pl?gene=SMAD4
CASP3	Caspase 3	Protein Coding	50	GC04M184627	40.1532	https://www.genecards.org/cgi-bin/carddisp.pl?gene=CASP3
RETN	Resistin	Protein Coding	43	GC19P007669	40.0736	https://www.genecards.org/cgi-bin/carddisp.pl?gene=RETN
PINK1	PTEN Induced Kinase 1	Protein Coding	47	GC01P020634	39.6867	https://www.genecards.org/cgi-bin/carddisp.pl?gene=PINK1
IRS1	Insulin Receptor Substrate 1	Protein Coding	47	GC02M226731	39.6368	https://www.genecards.org/cgi-bin/carddisp.pl?gene=IRS1
ABHD5	Abhydrolase Domain Containing 5, Lysophosphatidic Acid Acyltransferase	Protein Coding	45	GC03P043707	39.6278	https://www.genecards.org/cgi-bin/carddisp.pl?gene=ABHD5
MIR200B	MicroRNA 200b	RNA Gene	21	GC01P001167	39.4987	https://www.genecards.org/cgi-bin/carddisp.pl?gene=MIR200B
APOC3	Apolipoprotein C3	Protein Coding	44	GC11P116829	39.3756	https://www.genecards.org/cgi-bin/carddisp.pl?gene=APOC3
MPO	Myeloperoxidase	Protein Coding	50	GC17M058269	39.3003	https://www.genecards.org/cgi-bin/carddisp.pl?gene=MPO
PON1	Paraoxonase 1	Protein Coding	45	GC07M095297	39.2966	https://www.genecards.org/cgi-bin/carddisp.pl?gene=PON1
PPARGC1A	PPARG Coactivator 1 Alpha	Protein Coding	46	GC04M023755	39.2027	https://www.genecards.org/cgi-bin/carddisp.pl?gene=PPARGC1A
NOTCH1	Notch Receptor 1	Protein Coding	51	GC09M136832	39.014	https://www.genecards.org/cgi-bin/carddisp.pl?gene=NOTCH1
GFAP	Glial Fibrillary Acidic Protein	Protein Coding	47	GC17M044905	38.9886	https://www.genecards.org/cgi-bin/carddisp.pl?gene=GFAP
MIR203A	MicroRNA 203a	RNA Gene	20	GC14P106542	38.6783	https://www.genecards.org/cgi-bin/carddisp.pl?gene=MIR203A
KRT8	Keratin 8	Protein Coding	47	GC12M052897	38.6733	https://www.genecards.org/cgi-bin/carddisp.pl?gene=KRT8
CYBA	Cytochrome B-245 Alpha Chain	Protein Coding	47	GC16M088643	38.6061	https://www.genecards.org/cgi-bin/carddisp.pl?gene=CYBA
MMP1	Matrix Metallopeptidase 1	Protein Coding	51	GC11M102810	37.946	https://www.genecards.org/cgi-bin/carddisp.pl?gene=MMP1
MMP9	Matrix Metallopeptidase 9	Protein Coding	53	GC20P046008	37.4962	https://www.genecards.org/cgi-bin/carddisp.pl?gene=MMP9
UGT1A1	UDP Glucuronosyltransferase Family 1 Member A1	Protein Coding	48	GC02P233760	37.4696	https://www.genecards.org/cgi-bin/carddisp.pl?gene=UGT1A1
LEPR	Leptin Receptor	Protein Coding	49	GC01P065421	37.2497	https://www.genecards.org/cgi-bin/carddisp.pl?gene=LEPR
PNPLA2	Patatin Like Phospholipase Domain Containing 2	Protein Coding	45	GC11P001083	37.2256	https://www.genecards.org/cgi-bin/carddisp.pl?gene=PNPLA2
CP	Ceruloplasmin	Protein Coding	48	GC03M149162	36.9365	https://www.genecards.org/cgi-bin/carddisp.pl?gene=CP
MIR22	MicroRNA 22	RNA Gene	20	GC17M001713	36.5108	https://www.genecards.org/cgi-bin/carddisp.pl?gene=MIR22
UCP2	Uncoupling Protein 2	Protein Coding	45	GC11M073974	36.5104	https://www.genecards.org/cgi-bin/carddisp.pl?gene=UCP2
TNFRSF1A	TNF Receptor Superfamily Member 1A	Protein Coding	48	GC12M006328	36.28	https://www.genecards.org/cgi-bin/carddisp.pl?gene=TNFRSF1A
ABCC2	ATP Binding Cassette Subfamily C Member 2	Protein Coding	48	GC10P099782	36.2642	https://www.genecards.org/cgi-bin/carddisp.pl?gene=ABCC2
LIPC	Lipase C, Hepatic Type	Protein Coding	45	GC15P058410	36.1573	https://www.genecards.org/cgi-bin/carddisp.pl?gene=LIPC
ACACA	Acetyl-CoA Carboxylase Alpha	Protein Coding	49	GC17M037084	36.119	https://www.genecards.org/cgi-bin/carddisp.pl?gene=ACACA
HAMP	Hepcidin Antimicrobial Peptide	Protein Coding	44	GC19P041412	35.7394	https://www.genecards.org/cgi-bin/carddisp.pl?gene=HAMP
LCAT	Lecithin-Cholesterol Acyltransferase	Protein Coding	46	GC16M067939	35.5098	https://www.genecards.org/cgi-bin/carddisp.pl?gene=LCAT
ICAM1	Intercellular Adhesion Molecule 1	Protein Coding	50	GC19P010270	35.5021	https://www.genecards.org/cgi-bin/carddisp.pl?gene=ICAM1
PLP1	Proteolipid Protein 1	Protein Coding	43	GC0XP103773	35.2204	https://www.genecards.org/cgi-bin/carddisp.pl?gene=PLP1
IL4	Interleukin 4	Protein Coding	45	GC05P132673	34.9245	https://www.genecards.org/cgi-bin/carddisp.pl?gene=IL4
IL18	Interleukin 18	Protein Coding	43	GC11M112143	34.8281	https://www.genecards.org/cgi-bin/carddisp.pl?gene=IL18
PTGS2	Prostaglandin-Endoperoxide Synthase 2	Protein Coding	48	GC01M186640	34.7676	https://www.genecards.org/cgi-bin/carddisp.pl?gene=PTGS2
ESR1	Estrogen Receptor 1	Protein Coding	52	GC06P151656	34.6176	https://www.genecards.org/cgi-bin/carddisp.pl?gene=ESR1
SPP1	Secreted Phosphoprotein 1	Protein Coding	45	GC04P087975	34.513	https://www.genecards.org/cgi-bin/carddisp.pl?gene=SPP1
PLA2G6	Phospholipase A2 Group VI	Protein Coding	48	GC22M050884	34.4638	https://www.genecards.org/cgi-bin/carddisp.pl?gene=PLA2G6
MLXIPL	MLX Interacting Protein Like	Protein Coding	43	GC07M073593	34.3156	https://www.genecards.org/cgi-bin/carddisp.pl?gene=MLXIPL
CCND1	Cyclin D1	Protein Coding	52	GC11P069641	34.2206	https://www.genecards.org/cgi-bin/carddisp.pl?gene=CCND1
MAPK8	Mitogen-Activated Protein Kinase 8	Protein Coding	50	GC10P048306	34.1508	https://www.genecards.org/cgi-bin/carddisp.pl?gene=MAPK8
ELOVL6	ELOVL Fatty Acid Elongase 6	Protein Coding	40	GC04M110045	34.1011	https://www.genecards.org/cgi-bin/carddisp.pl?gene=ELOVL6
TF	Transferrin	Protein Coding	48	GC03P133666	33.9717	https://www.genecards.org/cgi-bin/carddisp.pl?gene=TF
NFKB1	Nuclear Factor Kappa B Subunit 1	Protein Coding	52	GC04P102501	33.9618	https://www.genecards.org/cgi-bin/carddisp.pl?gene=NFKB1
MIR126	MicroRNA 126	RNA Gene	23	GC09P136670	33.7221	https://www.genecards.org/cgi-bin/carddisp.pl?gene=MIR126
RELA	RELA Proto-Oncogene, NF-KB Subunit	Protein Coding	51	GC11M065653	33.6505	https://www.genecards.org/cgi-bin/carddisp.pl?gene=RELA
CAT	Catalase	Protein Coding	49	GC11P034460	33.5335	https://www.genecards.org/cgi-bin/carddisp.pl?gene=CAT
CDKN2A	Cyclin Dependent Kinase Inhibitor 2A	Protein Coding	51	GC09M021967	33.2705	https://www.genecards.org/cgi-bin/carddisp.pl?gene=CDKN2A
XBP1	X-Box Binding Protein 1	Protein Coding	45	GC22M028794	33.0006	https://www.genecards.org/cgi-bin/carddisp.pl?gene=XBP1
FASLG	Fas Ligand	Protein Coding	47	GC01P172628	32.9626	https://www.genecards.org/cgi-bin/carddisp.pl?gene=FASLG
IGF2R	Insulin Like Growth Factor 2 Receptor	Protein Coding	45	GC06P159969	32.8094	https://www.genecards.org/cgi-bin/carddisp.pl?gene=IGF2R
IRS2	Insulin Receptor Substrate 2	Protein Coding	45	GC13M109752	32.731	https://www.genecards.org/cgi-bin/carddisp.pl?gene=IRS2
SOD2	Superoxide Dismutase 2	Protein Coding	50	GC06M159669	32.6769	https://www.genecards.org/cgi-bin/carddisp.pl?gene=SOD2
IL1RN	Interleukin 1 Receptor Antagonist	Protein Coding	48	GC02P117302	32.6598	https://www.genecards.org/cgi-bin/carddisp.pl?gene=IL1RN
PTPN11	Protein Tyrosine Phosphatase Non-Receptor Type 11	Protein Coding	52	GC12P112418	32.5555	https://www.genecards.org/cgi-bin/carddisp.pl?gene=PTPN11
CYP2D6	Cytochrome P450 Family 2 Subfamily D Member 6	Protein Coding	48	GC22M042126	32.5094	https://www.genecards.org/cgi-bin/carddisp.pl?gene=CYP2D6
ATM	ATM Serine/Threonine Kinase	Protein Coding	52	GC11P108222	32.4463	https://www.genecards.org/cgi-bin/carddisp.pl?gene=ATM
TIMP1	TIMP Metallopeptidase Inhibitor 1	Protein Coding	44	GC0XP047583	32.297	https://www.genecards.org/cgi-bin/carddisp.pl?gene=TIMP1
MTOR	Mechanistic Target Of Rapamycin Kinase	Protein Coding	54	GC01M011106	32.2029	https://www.genecards.org/cgi-bin/carddisp.pl?gene=MTOR
SIRT1	Sirtuin 1	Protein Coding	48	GC10P067884	32.0078	https://www.genecards.org/cgi-bin/carddisp.pl?gene=SIRT1
AGT	Angiotensinogen	Protein Coding	49	GC01M230702	31.9987	https://www.genecards.org/cgi-bin/carddisp.pl?gene=AGT
BDNF	Brain Derived Neurotrophic Factor	Protein Coding	47	GC11M027654	31.8747	https://www.genecards.org/cgi-bin/carddisp.pl?gene=BDNF
HGF	Hepatocyte Growth Factor	Protein Coding	51	GC07M081699	31.857	https://www.genecards.org/cgi-bin/carddisp.pl?gene=HGF
STAT1	Signal Transducer And Activator Of Transcription 1	Protein Coding	52	GC02M190908	31.8196	https://www.genecards.org/cgi-bin/carddisp.pl?gene=STAT1
HMGCR	3-Hydroxy-3-Methylglutaryl-CoA Reductase	Protein Coding	46	GC05P075336	31.8125	https://www.genecards.org/cgi-bin/carddisp.pl?gene=HMGCR
FOXP3	Forkhead Box P3	Protein Coding	47	GC0XM049250	31.7874	https://www.genecards.org/cgi-bin/carddisp.pl?gene=FOXP3
TGFBR2	Transforming Growth Factor Beta Receptor 2	Protein Coding	50	GC03P030623	31.4876	https://www.genecards.org/cgi-bin/carddisp.pl?gene=TGFBR2
MYC	MYC Proto-Oncogene, BHLH Transcription Factor	Protein Coding	51	GC08P127735	31.4544	https://www.genecards.org/cgi-bin/carddisp.pl?gene=MYC
DGAT1	Diacylglycerol O-Acyltransferase 1	Protein Coding	47	GC08M144316	31.3593	https://www.genecards.org/cgi-bin/carddisp.pl?gene=DGAT1
ADIPOR1	Adiponectin Receptor 1	Protein Coding	45	GC01M202940	31.3064	https://www.genecards.org/cgi-bin/carddisp.pl?gene=ADIPOR1
TARDBP	TAR DNA Binding Protein	Protein Coding	46	GC01P011013	31.1643	https://www.genecards.org/cgi-bin/carddisp.pl?gene=TARDBP
SLC2A1	Solute Carrier Family 2 Member 1	Protein Coding	52	GC01M042925	31.1418	https://www.genecards.org/cgi-bin/carddisp.pl?gene=SLC2A1
ADIPOR2	Adiponectin Receptor 2	Protein Coding	43	GC12P001670	31.1185	https://www.genecards.org/cgi-bin/carddisp.pl?gene=ADIPOR2
GFER	Growth Factor, Augmenter Of Liver Regeneration	Protein Coding	44	GC16P001984	31.0611	https://www.genecards.org/cgi-bin/carddisp.pl?gene=GFER
MIR181A1	MicroRNA 181a-1	RNA Gene	19	GC01M198860	31.053	https://www.genecards.org/cgi-bin/carddisp.pl?gene=MIR181A1
HSD3B7	Hydroxy-Delta-5-Steroid Dehydrogenase, 3 Beta- And Steroid Delta-Isomerase 7	Protein Coding	42	GC16P030985	31.0391	https://www.genecards.org/cgi-bin/carddisp.pl?gene=HSD3B7
IL17A	Interleukin 17A	Protein Coding	41	GC06P052186	31.0351	https://www.genecards.org/cgi-bin/carddisp.pl?gene=IL17A
SLC27A2	Solute Carrier Family 27 Member 2	Protein Coding	45	GC15P050182	30.9014	https://www.genecards.org/cgi-bin/carddisp.pl?gene=SLC27A2
HP	Haptoglobin	Protein Coding	44	GC16P072089	30.73	https://www.genecards.org/cgi-bin/carddisp.pl?gene=HP
MIR132	MicroRNA 132	RNA Gene	22	GC17M002049	30.5885	https://www.genecards.org/cgi-bin/carddisp.pl?gene=MIR132
TNFRSF11B	TNF Receptor Superfamily Member 11b	Protein Coding	47	GC08M118923	30.5876	https://www.genecards.org/cgi-bin/carddisp.pl?gene=TNFRSF11B
NR1H2	Nuclear Receptor Subfamily 1 Group H Member 2	Protein Coding	48	GC19P050329	30.5849	https://www.genecards.org/cgi-bin/carddisp.pl?gene=NR1H2
NDUFS1	NADH:Ubiquinone Oxidoreductase Core Subunit S1	Protein Coding	46	GC02M206114	30.5434	https://www.genecards.org/cgi-bin/carddisp.pl?gene=NDUFS1
COL1A1	Collagen Type I Alpha 1 Chain	Protein Coding	50	GC17M050183	30.2357	https://www.genecards.org/cgi-bin/carddisp.pl?gene=COL1A1
MEFV	MEFV Innate Immuity Regulator, Pyrin	Protein Coding	44	GC16M003970	30.0987	https://www.genecards.org/cgi-bin/carddisp.pl?gene=MEFV
NOS2	Nitric Oxide Synthase 2	Protein Coding	50	GC17M027756	30.0981	https://www.genecards.org/cgi-bin/carddisp.pl?gene=NOS2
MMP2	Matrix Metallopeptidase 2	Protein Coding	52	GC16P055390	29.9824	https://www.genecards.org/cgi-bin/carddisp.pl?gene=MMP2
CYP1A2	Cytochrome P450 Family 1 Subfamily A Member 2	Protein Coding	45	GC15P074748	29.8331	https://www.genecards.org/cgi-bin/carddisp.pl?gene=CYP1A2
GRN	Granulin Precursor	Protein Coding	46	GC17P044345	29.7816	https://www.genecards.org/cgi-bin/carddisp.pl?gene=GRN
DDIT3	DNA Damage Inducible Transcript 3	Protein Coding	45	GC12M057516	29.7413	https://www.genecards.org/cgi-bin/carddisp.pl?gene=DDIT3
CYP1A1	Cytochrome P450 Family 1 Subfamily A Member 1	Protein Coding	47	GC15M074719	29.7143	https://www.genecards.org/cgi-bin/carddisp.pl?gene=CYP1A1
CYCS	Cytochrome C, Somatic	Protein Coding	48	GC07M025118	29.5905	https://www.genecards.org/cgi-bin/carddisp.pl?gene=CYCS
NLRP3	NLR Family Pyrin Domain Containing 3	Protein Coding	47	GC01P247415	29.4806	https://www.genecards.org/cgi-bin/carddisp.pl?gene=NLRP3
FN1	Fibronectin 1	Protein Coding	50	GC02M215360	29.4408	https://www.genecards.org/cgi-bin/carddisp.pl?gene=FN1
CETP	Cholesteryl Ester Transfer Protein	Protein Coding	47	GC16P056961	29.2784	https://www.genecards.org/cgi-bin/carddisp.pl?gene=CETP
MIR140	MicroRNA 140	RNA Gene	22	GC16P069934	29.1579	https://www.genecards.org/cgi-bin/carddisp.pl?gene=MIR140
SLC27A4	Solute Carrier Family 27 Member 4	Protein Coding	46	GC09P128340	29.13	https://www.genecards.org/cgi-bin/carddisp.pl?gene=SLC27A4
REN	Renin	Protein Coding	47	GC01M204154	29.0802	https://www.genecards.org/cgi-bin/carddisp.pl?gene=REN
IL2RA	Interleukin 2 Receptor Subunit Alpha	Protein Coding	50	GC10M006010	28.9265	https://www.genecards.org/cgi-bin/carddisp.pl?gene=IL2RA
CYP2C9	Cytochrome P450 Family 2 Subfamily C Member 9	Protein Coding	49	GC10P094938	28.8893	https://www.genecards.org/cgi-bin/carddisp.pl?gene=CYP2C9
GCK	Glucokinase	Protein Coding	50	GC07M044190	28.5601	https://www.genecards.org/cgi-bin/carddisp.pl?gene=GCK
IFNA1	Interferon Alpha 1	Protein Coding	39	GC09P021532	28.5468	https://www.genecards.org/cgi-bin/carddisp.pl?gene=IFNA1
SLC27A1	Solute Carrier Family 27 Member 1	Protein Coding	41	GC19P027775	28.4753	https://www.genecards.org/cgi-bin/carddisp.pl?gene=SLC27A1
CD40LG	CD40 Ligand	Protein Coding	47	GC0XP136649	28.4352	https://www.genecards.org/cgi-bin/carddisp.pl?gene=CD40LG
ASS1	Argininosuccinate Synthase 1	Protein Coding	48	GC09P130444	28.434	https://www.genecards.org/cgi-bin/carddisp.pl?gene=ASS1
C3	Complement C3	Protein Coding	47	GC19M006677	28.429	https://www.genecards.org/cgi-bin/carddisp.pl?gene=C3
SLC40A1	Solute Carrier Family 40 Member 1	Protein Coding	46	GC02M189560	28.3816	https://www.genecards.org/cgi-bin/carddisp.pl?gene=SLC40A1
AGTR1	Angiotensin II Receptor Type 1	Protein Coding	51	GC03P148697	28.3504	https://www.genecards.org/cgi-bin/carddisp.pl?gene=AGTR1
HNRNPA1	Heterogeneous Nuclear Ribonucleoprotein A1	Protein Coding	46	GC12P054280	28.2528	https://www.genecards.org/cgi-bin/carddisp.pl?gene=HNRNPA1
GSTM1	Glutathione S-Transferase Mu 1	Protein Coding	42	GC01P109687	28.2242	https://www.genecards.org/cgi-bin/carddisp.pl?gene=GSTM1
ALDH2	Aldehyde Dehydrogenase 2 Family Member	Protein Coding	50	GC12P111766	28.1587	https://www.genecards.org/cgi-bin/carddisp.pl?gene=ALDH2
JUN	Jun Proto-Oncogene, AP-1 Transcription Factor Subunit	Protein Coding	48	GC01M058780	28.0755	https://www.genecards.org/cgi-bin/carddisp.pl?gene=JUN
TFR2	Transferrin Receptor 2	Protein Coding	44	GC07M100620	28.0389	https://www.genecards.org/cgi-bin/carddisp.pl?gene=TFR2
LIPE	Lipase E, Hormone Sensitive Type	Protein Coding	47	GC19M042401	28.0171	https://www.genecards.org/cgi-bin/carddisp.pl?gene=LIPE
VDR	Vitamin D Receptor	Protein Coding	51	GC12M047841	27.8097	https://www.genecards.org/cgi-bin/carddisp.pl?gene=VDR
GSTP1	Glutathione S-Transferase Pi 1	Protein Coding	50	GC11P067583	27.803	https://www.genecards.org/cgi-bin/carddisp.pl?gene=GSTP1
PCSK9	Proprotein Convertase Subtilisin/Kexin Type 9	Protein Coding	50	GC01P055039	27.7535	https://www.genecards.org/cgi-bin/carddisp.pl?gene=PCSK9
ACADL	Acyl-CoA Dehydrogenase Long Chain	Protein Coding	43	GC02M210187	27.7176	https://www.genecards.org/cgi-bin/carddisp.pl?gene=ACADL
PEMT	Phosphatidylethanolamine N-Methyltransferase	Protein Coding	41	GC17M017506	27.6444	https://www.genecards.org/cgi-bin/carddisp.pl?gene=PEMT
ACACB	Acetyl-CoA Carboxylase Beta	Protein Coding	46	GC12P109116	27.5492	https://www.genecards.org/cgi-bin/carddisp.pl?gene=ACACB
FADS3	Fatty Acid Desaturase 3	Protein Coding	37	GC11M061873	27.4584	https://www.genecards.org/cgi-bin/carddisp.pl?gene=FADS3
SMARCA4	SWI/SNF Related, Matrix Associated, Actin Dependent Regulator Of Chromatin, Subfamily A, Member 4	Protein Coding	49	GC19P010932	27.4565	https://www.genecards.org/cgi-bin/carddisp.pl?gene=SMARCA4
SPINK1	Serine Peptidase Inhibitor Kazal Type 1	Protein Coding	43	GC05M147825	27.4298	https://www.genecards.org/cgi-bin/carddisp.pl?gene=SPINK1
ADH1C	Alcohol Dehydrogenase 1C (Class I), Gamma Polypeptide	Protein Coding	42	GC04M099336	27.277	https://www.genecards.org/cgi-bin/carddisp.pl?gene=ADH1C
MIR107	MicroRNA 107	RNA Gene	19	GC10M089600	27.2554	https://www.genecards.org/cgi-bin/carddisp.pl?gene=MIR107
MIR181B1	MicroRNA 181b-1	RNA Gene	20	GC01M198858	27.2084	https://www.genecards.org/cgi-bin/carddisp.pl?gene=MIR181B1
HIF1A	Hypoxia Inducible Factor 1 Subunit Alpha	Protein Coding	47	GC14P061695	26.981	https://www.genecards.org/cgi-bin/carddisp.pl?gene=HIF1A
AIFM1	Apoptosis Inducing Factor Mitochondria Associated 1	Protein Coding	48	GC0XM130129	26.9132	https://www.genecards.org/cgi-bin/carddisp.pl?gene=AIFM1
MIR29C	MicroRNA 29c	RNA Gene	19	GC01M207802	26.8242	https://www.genecards.org/cgi-bin/carddisp.pl?gene=MIR29C
CCN2	Cellular Communication Network Factor 2	Protein Coding	38	GC06M131948	26.7066	https://www.genecards.org/cgi-bin/carddisp.pl?gene=CCN2
MIF	Macrophage Migration Inhibitory Factor	Protein Coding	49	GC22P023894	26.6808	https://www.genecards.org/cgi-bin/carddisp.pl?gene=MIF
APOA5	Apolipoprotein A5	Protein Coding	44	GC11M116789	26.6565	https://www.genecards.org/cgi-bin/carddisp.pl?gene=APOA5
CYP7A1	Cytochrome P450 Family 7 Subfamily A Member 1	Protein Coding	43	GC08M058476	26.656	https://www.genecards.org/cgi-bin/carddisp.pl?gene=CYP7A1
PIK3R1	Phosphoinositide-3-Kinase Regulatory Subunit 1	Protein Coding	51	GC05P068215	26.5772	https://www.genecards.org/cgi-bin/carddisp.pl?gene=PIK3R1
ACTB	Actin Beta	Protein Coding	49	GC07M005527	26.5681	https://www.genecards.org/cgi-bin/carddisp.pl?gene=ACTB
HJV	Hemojuvelin BMP Co-Receptor	Protein Coding	36	GC01M146018	26.5117	https://www.genecards.org/cgi-bin/carddisp.pl?gene=HJV
CEBPA	CCAAT Enhancer Binding Protein Alpha	Protein Coding	47	GC19M033299	26.4742	https://www.genecards.org/cgi-bin/carddisp.pl?gene=CEBPA
ATP2A2	ATPase Sarcoplasmic/Endoplasmic Reticulum Ca2+ Transporting 2	Protein Coding	51	GC12P110280	26.4158	https://www.genecards.org/cgi-bin/carddisp.pl?gene=ATP2A2
ARSA	Arylsulfatase A	Protein Coding	46	GC22M050622	26.2981	https://www.genecards.org/cgi-bin/carddisp.pl?gene=ARSA
PLIN2	Perilipin 2	Protein Coding	43	GC09M019131	26.2339	https://www.genecards.org/cgi-bin/carddisp.pl?gene=PLIN2
B2M	Beta-2-Microglobulin	Protein Coding	48	GC15P044711	26.1602	https://www.genecards.org/cgi-bin/carddisp.pl?gene=B2M
PRKAA1	Protein Kinase AMP-Activated Catalytic Subunit Alpha 1	Protein Coding	47	GC05M040759	26.1418	https://www.genecards.org/cgi-bin/carddisp.pl?gene=PRKAA1
PRKCD	Protein Kinase C Delta	Protein Coding	54	GC03P053156	26.1255	https://www.genecards.org/cgi-bin/carddisp.pl?gene=PRKCD
GCG	Glucagon	Protein Coding	41	GC02M162142	26.0901	https://www.genecards.org/cgi-bin/carddisp.pl?gene=GCG
AHSG	Alpha 2-HS Glycoprotein	Protein Coding	43	GC03P186612	26.0608	https://www.genecards.org/cgi-bin/carddisp.pl?gene=AHSG
MIR200A	MicroRNA 200a	RNA Gene	22	GC01P002223	26.0425	https://www.genecards.org/cgi-bin/carddisp.pl?gene=MIR200A
TM6SF2	Transmembrane 6 Superfamily Member 2	Protein Coding	29	GC19M019264	26.0164	https://www.genecards.org/cgi-bin/carddisp.pl?gene=TM6SF2
MT-ND6	Mitochondrially Encoded NADH:Ubiquinone Oxidoreductase Core Subunit 6	Protein Coding	33	GCMTM014151	26.0101	https://www.genecards.org/cgi-bin/carddisp.pl?gene=MT-ND6
PCK2	Phosphoenolpyruvate Carboxykinase 2, Mitochondrial	Protein Coding	47	GC14P024094	26.0009	https://www.genecards.org/cgi-bin/carddisp.pl?gene=PCK2
F3	Coagulation Factor III, Tissue Factor	Protein Coding	44	GC01M094530	25.9637	https://www.genecards.org/cgi-bin/carddisp.pl?gene=F3
IL13	Interleukin 13	Protein Coding	44	GC05P132656	25.8625	https://www.genecards.org/cgi-bin/carddisp.pl?gene=IL13
PRKAB1	Protein Kinase AMP-Activated Non-Catalytic Subunit Beta 1	Protein Coding	47	GC12P119632	25.7613	https://www.genecards.org/cgi-bin/carddisp.pl?gene=PRKAB1
GCKR	Glucokinase Regulator	Protein Coding	41	GC02P027496	25.5826	https://www.genecards.org/cgi-bin/carddisp.pl?gene=GCKR
PDCD1	Programmed Cell Death 1	Protein Coding	47	GC02M241849	25.5561	https://www.genecards.org/cgi-bin/carddisp.pl?gene=PDCD1
HSPD1	Heat Shock Protein Family D (Hsp60) Member 1	Protein Coding	47	GC02M197486	25.5443	https://www.genecards.org/cgi-bin/carddisp.pl?gene=HSPD1
FFAR4	Free Fatty Acid Receptor 4	Protein Coding	38	GC10P093566	25.4777	https://www.genecards.org/cgi-bin/carddisp.pl?gene=FFAR4
MAP3K5	Mitogen-Activated Protein Kinase Kinase Kinase 5	Protein Coding	47	GC06M136557	25.3972	https://www.genecards.org/cgi-bin/carddisp.pl?gene=MAP3K5
IL6R	Interleukin 6 Receptor	Protein Coding	48	GC01P154405	25.2948	https://www.genecards.org/cgi-bin/carddisp.pl?gene=IL6R
CCL5	C-C Motif Chemokine Ligand 5	Protein Coding	43	GC17M035871	25.2708	https://www.genecards.org/cgi-bin/carddisp.pl?gene=CCL5
MIR31	MicroRNA 31	RNA Gene	20	GC09M021520	25.1975	https://www.genecards.org/cgi-bin/carddisp.pl?gene=MIR31
COMT	Catechol-O-Methyltransferase	Protein Coding	51	GC22P019941	25.016	https://www.genecards.org/cgi-bin/carddisp.pl?gene=COMT
ELANE	Elastase, Neutrophil Expressed	Protein Coding	46	GC19P000871	24.8361	https://www.genecards.org/cgi-bin/carddisp.pl?gene=ELANE
CYP2C19	Cytochrome P450 Family 2 Subfamily C Member 19	Protein Coding	48	GC10P094762	24.8226	https://www.genecards.org/cgi-bin/carddisp.pl?gene=CYP2C19
BMP6	Bone Morphogenetic Protein 6	Protein Coding	43	GC06P007726	24.8164	https://www.genecards.org/cgi-bin/carddisp.pl?gene=BMP6
CYP2A6	Cytochrome P450 Family 2 Subfamily A Member 6	Protein Coding	48	GC19M040843	24.8003	https://www.genecards.org/cgi-bin/carddisp.pl?gene=CYP2A6
NFE2L2	Nuclear Factor, Erythroid 2 Like 2	Protein Coding	48	GC02M177227	24.7956	https://www.genecards.org/cgi-bin/carddisp.pl?gene=NFE2L2
GSK3B	Glycogen Synthase Kinase 3 Beta	Protein Coding	50	GC03M119821	24.6793	https://www.genecards.org/cgi-bin/carddisp.pl?gene=GSK3B
MIR199A1	MicroRNA 199a-1	RNA Gene	19	GC19M010817	24.3313	https://www.genecards.org/cgi-bin/carddisp.pl?gene=MIR199A1
SLC2A4	Solute Carrier Family 2 Member 4	Protein Coding	46	GC17P009310	24.2832	https://www.genecards.org/cgi-bin/carddisp.pl?gene=SLC2A4
DPP4	Dipeptidyl Peptidase 4	Protein Coding	49	GC02M161992	24.2296	https://www.genecards.org/cgi-bin/carddisp.pl?gene=DPP4
VIM	Vimentin	Protein Coding	50	GC10P017227	24.2271	https://www.genecards.org/cgi-bin/carddisp.pl?gene=VIM
ATF4	Activating Transcription Factor 4	Protein Coding	46	GC22P039558	24.2019	https://www.genecards.org/cgi-bin/carddisp.pl?gene=ATF4
BCL2	BCL2 Apoptosis Regulator	Protein Coding	50	GC18M063123	24.1656	https://www.genecards.org/cgi-bin/carddisp.pl?gene=BCL2
UGT1A7	UDP Glucuronosyltransferase Family 1 Member A7	Protein Coding	39	GC02P233681	24.1655	https://www.genecards.org/cgi-bin/carddisp.pl?gene=UGT1A7
SOCS3	Suppressor Of Cytokine Signaling 3	Protein Coding	44	GC17M078356	24.161	https://www.genecards.org/cgi-bin/carddisp.pl?gene=SOCS3
NR1I2	Nuclear Receptor Subfamily 1 Group I Member 2	Protein Coding	46	GC03P119780	24.1107	https://www.genecards.org/cgi-bin/carddisp.pl?gene=NR1I2
NAMPT	Nicotinamide Phosphoribosyltransferase	Protein Coding	47	GC07M106248	24.1024	https://www.genecards.org/cgi-bin/carddisp.pl?gene=NAMPT
MIR30A	MicroRNA 30a	RNA Gene	20	GC06M071403	24.0237	https://www.genecards.org/cgi-bin/carddisp.pl?gene=MIR30A
FTL	Ferritin Light Chain	Protein Coding	47	GC19P048965	23.9564	https://www.genecards.org/cgi-bin/carddisp.pl?gene=FTL
CD28	CD28 Molecule	Protein Coding	46	GC02P203706	23.9254	https://www.genecards.org/cgi-bin/carddisp.pl?gene=CD28
H19	H19 Imprinted Maternally Expressed Transcript	RNA Gene	28	GC11M001995	23.9226	https://www.genecards.org/cgi-bin/carddisp.pl?gene=H19
IGF1R	Insulin Like Growth Factor 1 Receptor	Protein Coding	54	GC15P098648	23.7721	https://www.genecards.org/cgi-bin/carddisp.pl?gene=IGF1R
NPPB	Natriuretic Peptide B	Protein Coding	44	GC01M011858	23.7026	https://www.genecards.org/cgi-bin/carddisp.pl?gene=NPPB
IKBKB	Inhibitor Of Nuclear Factor Kappa B Kinase Subunit Beta	Protein Coding	52	GC08P042271	23.4392	https://www.genecards.org/cgi-bin/carddisp.pl?gene=IKBKB
MYH9	Myosin Heavy Chain 9	Protein Coding	50	GC22M036281	23.4325	https://www.genecards.org/cgi-bin/carddisp.pl?gene=MYH9
EIF2S1	Eukaryotic Translation Initiation Factor 2 Subunit Alpha	Protein Coding	44	GC14P067359	23.4079	https://www.genecards.org/cgi-bin/carddisp.pl?gene=EIF2S1
SREBF2	Sterol Regulatory Element Binding Transcription Factor 2	Protein Coding	43	GC22P041833	23.4043	https://www.genecards.org/cgi-bin/carddisp.pl?gene=SREBF2
TGFBR1	Transforming Growth Factor Beta Receptor 1	Protein Coding	52	GC09P099104	23.3898	https://www.genecards.org/cgi-bin/carddisp.pl?gene=TGFBR1
CD34	CD34 Molecule	Protein Coding	43	GC01M207880	23.3329	https://www.genecards.org/cgi-bin/carddisp.pl?gene=CD34
IDH1	Isocitrate Dehydrogenase (NADP(+)) 1	Protein Coding	52	GC02M208236	23.3301	https://www.genecards.org/cgi-bin/carddisp.pl?gene=IDH1
FGF21	Fibroblast Growth Factor 21	Protein Coding	39	GC19P048784	23.2918	https://www.genecards.org/cgi-bin/carddisp.pl?gene=FGF21
POMC	Proopiomelanocortin	Protein Coding	47	GC02M025160	23.1335	https://www.genecards.org/cgi-bin/carddisp.pl?gene=POMC
PDGFRB	Platelet Derived Growth Factor Receptor Beta	Protein Coding	54	GC05M150113	23.0635	https://www.genecards.org/cgi-bin/carddisp.pl?gene=PDGFRB
TET2	Tet Methylcytosine Dioxygenase 2	Protein Coding	44	GC04P105145	23.0388	https://www.genecards.org/cgi-bin/carddisp.pl?gene=TET2
CDKN1A	Cyclin Dependent Kinase Inhibitor 1A	Protein Coding	48	GC06P058459	22.9851	https://www.genecards.org/cgi-bin/carddisp.pl?gene=CDKN1A
EIF2AK4	Eukaryotic Translation Initiation Factor 2 Alpha Kinase 4	Protein Coding	45	GC15P039934	22.9603	https://www.genecards.org/cgi-bin/carddisp.pl?gene=EIF2AK4
CD40	CD40 Molecule	Protein Coding	47	GC20P046118	22.8691	https://www.genecards.org/cgi-bin/carddisp.pl?gene=CD40
ALPP	Alkaline Phosphatase, Placental	Protein Coding	45	GC02P232378	22.8125	https://www.genecards.org/cgi-bin/carddisp.pl?gene=ALPP
SHH	Sonic Hedgehog Signaling Molecule	Protein Coding	49	GC07M155799	22.7588	https://www.genecards.org/cgi-bin/carddisp.pl?gene=SHH
BGLAP	Bone Gamma-Carboxyglutamate Protein	Protein Coding	40	GC01P156242	22.7422	https://www.genecards.org/cgi-bin/carddisp.pl?gene=BGLAP
SLC27A5	Solute Carrier Family 27 Member 5	Protein Coding	43	GC19M058479	22.5691	https://www.genecards.org/cgi-bin/carddisp.pl?gene=SLC27A5
NR4A2	Nuclear Receptor Subfamily 4 Group A Member 2	Protein Coding	47	GC02M156324	22.5415	https://www.genecards.org/cgi-bin/carddisp.pl?gene=NR4A2
IFNA2	Interferon Alpha 2	Protein Coding	41	GC09M021384	22.4073	https://www.genecards.org/cgi-bin/carddisp.pl?gene=IFNA2
MALAT1	Metastasis Associated Lung Adenocarcinoma Transcript 1	RNA Gene	23	GC11P066818	22.3042	https://www.genecards.org/cgi-bin/carddisp.pl?gene=MALAT1
CXCL10	C-X-C Motif Chemokine Ligand 10	Protein Coding	44	GC04M076021	22.2346	https://www.genecards.org/cgi-bin/carddisp.pl?gene=CXCL10
GHRL	Ghrelin And Obestatin Prepropeptide	Protein Coding	43	GC03M010285	22.1913	https://www.genecards.org/cgi-bin/carddisp.pl?gene=GHRL
PLA2G2A	Phospholipase A2 Group IIA	Protein Coding	47	GC01M019975	22.1844	https://www.genecards.org/cgi-bin/carddisp.pl?gene=PLA2G2A
EIF2AK3	Eukaryotic Translation Initiation Factor 2 Alpha Kinase 3	Protein Coding	49	GC02M088556	22.1244	https://www.genecards.org/cgi-bin/carddisp.pl?gene=EIF2AK3
COPA	COPI Coat Complex Subunit Alpha	Protein Coding	42	GC01M160288	22.1109	https://www.genecards.org/cgi-bin/carddisp.pl?gene=COPA
TCF7L2	Transcription Factor 7 Like 2	Protein Coding	46	GC10P112950	22.0759	https://www.genecards.org/cgi-bin/carddisp.pl?gene=TCF7L2
HBA1	Hemoglobin Subunit Alpha 1	Protein Coding	42	GC16P006099	22.0139	https://www.genecards.org/cgi-bin/carddisp.pl?gene=HBA1
ACSL1	Acyl-CoA Synthetase Long Chain Family Member 1	Protein Coding	44	GC04M184755	22.0084	https://www.genecards.org/cgi-bin/carddisp.pl?gene=ACSL1
XDH	Xanthine Dehydrogenase	Protein Coding	47	GC02M031334	21.9418	https://www.genecards.org/cgi-bin/carddisp.pl?gene=XDH
MIR200C	MicroRNA 200c	RNA Gene	22	GC12P013192	21.8607	https://www.genecards.org/cgi-bin/carddisp.pl?gene=MIR200C
MDM2	MDM2 Proto-Oncogene	Protein Coding	52	GC12P068808	21.7972	https://www.genecards.org/cgi-bin/carddisp.pl?gene=MDM2
PCK1	Phosphoenolpyruvate Carboxykinase 1	Protein Coding	48	GC20P057561	21.7818	https://www.genecards.org/cgi-bin/carddisp.pl?gene=PCK1
IL21	Interleukin 21	Protein Coding	42	GC04M122612	21.7583	https://www.genecards.org/cgi-bin/carddisp.pl?gene=IL21
TFRC	Transferrin Receptor	Protein Coding	48	GC03M196027	21.7009	https://www.genecards.org/cgi-bin/carddisp.pl?gene=TFRC
LCN2	Lipocalin 2	Protein Coding	43	GC09P128149	21.6913	https://www.genecards.org/cgi-bin/carddisp.pl?gene=LCN2
GHR	Growth Hormone Receptor	Protein Coding	46	GC05P042429	21.6643	https://www.genecards.org/cgi-bin/carddisp.pl?gene=GHR
CNR1	Cannabinoid Receptor 1	Protein Coding	47	GC06M088139	21.6107	https://www.genecards.org/cgi-bin/carddisp.pl?gene=CNR1
FLT1	Fms Related Receptor Tyrosine Kinase 1	Protein Coding	50	GC13M028300	21.573	https://www.genecards.org/cgi-bin/carddisp.pl?gene=FLT1
SLPI	Secretory Leukocyte Peptidase Inhibitor	Protein Coding	39	GC20M045252	21.5242	https://www.genecards.org/cgi-bin/carddisp.pl?gene=SLPI
RIPK1	Receptor Interacting Serine/Threonine Kinase 1	Protein Coding	49	GC06P003073	21.5124	https://www.genecards.org/cgi-bin/carddisp.pl?gene=RIPK1
HSPA5	Heat Shock Protein Family A (Hsp70) Member 5	Protein Coding	47	GC09M125234	21.3585	https://www.genecards.org/cgi-bin/carddisp.pl?gene=HSPA5
TNFAIP3	TNF Alpha Induced Protein 3	Protein Coding	48	GC06P137866	21.335	https://www.genecards.org/cgi-bin/carddisp.pl?gene=TNFAIP3
ASL	Argininosuccinate Lyase	Protein Coding	45	GC07P066075	21.3054	https://www.genecards.org/cgi-bin/carddisp.pl?gene=ASL
TNFSF11	TNF Superfamily Member 11	Protein Coding	47	GC13P042562	21.2492	https://www.genecards.org/cgi-bin/carddisp.pl?gene=TNFSF11
CPS1	Carbamoyl-Phosphate Synthase 1	Protein Coding	45	GC02P210477	21.1905	https://www.genecards.org/cgi-bin/carddisp.pl?gene=CPS1
DNMT1	DNA Methyltransferase 1	Protein Coding	51	GC19M010133	20.9636	https://www.genecards.org/cgi-bin/carddisp.pl?gene=DNMT1
ACSL5	Acyl-CoA Synthetase Long Chain Family Member 5	Protein Coding	43	GC10P112374	20.9172	https://www.genecards.org/cgi-bin/carddisp.pl?gene=ACSL5
RARRES2	Retinoic Acid Receptor Responder 2	Protein Coding	38	GC07M150333	20.9143	https://www.genecards.org/cgi-bin/carddisp.pl?gene=RARRES2
APOA2	Apolipoprotein A2	Protein Coding	44	GC01M161222	20.8927	https://www.genecards.org/cgi-bin/carddisp.pl?gene=APOA2
IGFBP3	Insulin Like Growth Factor Binding Protein 3	Protein Coding	44	GC07M045912	20.8808	https://www.genecards.org/cgi-bin/carddisp.pl?gene=IGFBP3
MSR1	Macrophage Scavenger Receptor 1	Protein Coding	45	GC08M016107	20.8327	https://www.genecards.org/cgi-bin/carddisp.pl?gene=MSR1
CD14	CD14 Molecule	Protein Coding	44	GC05M140631	20.7452	https://www.genecards.org/cgi-bin/carddisp.pl?gene=CD14
LRP6	LDL Receptor Related Protein 6	Protein Coding	48	GC12M016340	20.724	https://www.genecards.org/cgi-bin/carddisp.pl?gene=LRP6
GH1	Growth Hormone 1	Protein Coding	44	GC17M063917	20.7	https://www.genecards.org/cgi-bin/carddisp.pl?gene=GH1
CHIT1	Chitinase 1	Protein Coding	43	GC01M203181	20.5987	https://www.genecards.org/cgi-bin/carddisp.pl?gene=CHIT1
PC	Pyruvate Carboxylase	Protein Coding	47	GC11M066848	20.5648	https://www.genecards.org/cgi-bin/carddisp.pl?gene=PC
TLR9	Toll Like Receptor 9	Protein Coding	44	GC03M052222	20.5279	https://www.genecards.org/cgi-bin/carddisp.pl?gene=TLR9
ADRB2	Adrenoceptor Beta 2	Protein Coding	50	GC05P148825	20.5036	https://www.genecards.org/cgi-bin/carddisp.pl?gene=ADRB2
CDH2	Cadherin 2	Protein Coding	52	GC18M027950	20.4559	https://www.genecards.org/cgi-bin/carddisp.pl?gene=CDH2
MYD88	MYD88 Innate Immune Signal Transduction Adaptor	Protein Coding	48	GC03P038139	20.4545	https://www.genecards.org/cgi-bin/carddisp.pl?gene=MYD88
LOX	Lysyl Oxidase	Protein Coding	45	GC05M122063	20.4412	https://www.genecards.org/cgi-bin/carddisp.pl?gene=LOX
PPARD	Peroxisome Proliferator Activated Receptor Delta	Protein Coding	47	GC06P058435	20.4235	https://www.genecards.org/cgi-bin/carddisp.pl?gene=PPARD
CTSB	Cathepsin B	Protein Coding	51	GC08M011842	20.4016	https://www.genecards.org/cgi-bin/carddisp.pl?gene=CTSB
COL3A1	Collagen Type III Alpha 1 Chain	Protein Coding	46	GC02P188974	20.3587	https://www.genecards.org/cgi-bin/carddisp.pl?gene=COL3A1
CYP4A11	Cytochrome P450 Family 4 Subfamily A Member 11	Protein Coding	43	GC01M046929	20.3533	https://www.genecards.org/cgi-bin/carddisp.pl?gene=CYP4A11
CLU	Clusterin	Protein Coding	45	GC08M027596	20.2954	https://www.genecards.org/cgi-bin/carddisp.pl?gene=CLU
RXRA	Retinoid X Receptor Alpha	Protein Coding	50	GC09P134317	20.2498	https://www.genecards.org/cgi-bin/carddisp.pl?gene=RXRA
ADH1B	Alcohol Dehydrogenase 1B (Class I), Beta Polypeptide	Protein Coding	44	GC04M099304	20.1835	https://www.genecards.org/cgi-bin/carddisp.pl?gene=ADH1B
MIR130A	MicroRNA 130a	RNA Gene	20	GC11P057641	20.1524	https://www.genecards.org/cgi-bin/carddisp.pl?gene=MIR130A
MIR16-1	MicroRNA 16-1	RNA Gene	22	GC13M050048	20.1265	https://www.genecards.org/cgi-bin/carddisp.pl?gene=MIR16-1
ACSL3	Acyl-CoA Synthetase Long Chain Family Member 3	Protein Coding	41	GC02P222860	20.1147	https://www.genecards.org/cgi-bin/carddisp.pl?gene=ACSL3
ABCB7	ATP Binding Cassette Subfamily B Member 7	Protein Coding	44	GC0XM075053	20.0153	https://www.genecards.org/cgi-bin/carddisp.pl?gene=ABCB7
ALK	ALK Receptor Tyrosine Kinase	Protein Coding	51	GC02M029190	19.9926	https://www.genecards.org/cgi-bin/carddisp.pl?gene=ALK
LIVAR	Liver Cell Viability Associated LncRNA	RNA Gene	10	GC18M070336	19.9662	https://www.genecards.org/cgi-bin/carddisp.pl?gene=LIVAR
FGF19	Fibroblast Growth Factor 19	Protein Coding	43	GC11M071943	19.9283	https://www.genecards.org/cgi-bin/carddisp.pl?gene=FGF19
IL1R1	Interleukin 1 Receptor Type 1	Protein Coding	45	GC02P102136	19.909	https://www.genecards.org/cgi-bin/carddisp.pl?gene=IL1R1
ERN1	Endoplasmic Reticulum To Nucleus Signaling 1	Protein Coding	45	GC17M064039	19.8339	https://www.genecards.org/cgi-bin/carddisp.pl?gene=ERN1
SHBG	Sex Hormone Binding Globulin	Protein Coding	40	GC17P007613	19.8322	https://www.genecards.org/cgi-bin/carddisp.pl?gene=SHBG
CYP2B6	Cytochrome P450 Family 2 Subfamily B Member 6	Protein Coding	47	GC19P040991	19.8296	https://www.genecards.org/cgi-bin/carddisp.pl?gene=CYP2B6
APOC2	Apolipoprotein C2	Protein Coding	44	GC19P044945	19.8091	https://www.genecards.org/cgi-bin/carddisp.pl?gene=APOC2
NR5A2	Nuclear Receptor Subfamily 5 Group A Member 2	Protein Coding	46	GC01P199996	19.7117	https://www.genecards.org/cgi-bin/carddisp.pl?gene=NR5A2
NPY	Neuropeptide Y	Protein Coding	45	GC07P024290	19.6927	https://www.genecards.org/cgi-bin/carddisp.pl?gene=NPY
NGF	Nerve Growth Factor	Protein Coding	50	GC01M115285	19.6902	https://www.genecards.org/cgi-bin/carddisp.pl?gene=NGF
ACTC1	Actin Alpha Cardiac Muscle 1	Protein Coding	43	GC15M034790	19.6595	https://www.genecards.org/cgi-bin/carddisp.pl?gene=ACTC1
CD44	CD44 Molecule (Indian Blood Group)	Protein Coding	47	GC11P035139	19.6103	https://www.genecards.org/cgi-bin/carddisp.pl?gene=CD44
PPIG	Peptidylprolyl Isomerase G	Protein Coding	41	GC02P169584	19.5363	https://www.genecards.org/cgi-bin/carddisp.pl?gene=PPIG
PLA2G4A	Phospholipase A2 Group IVA	Protein Coding	49	GC01P186798	19.5304	https://www.genecards.org/cgi-bin/carddisp.pl?gene=PLA2G4A
IGFBP1	Insulin Like Growth Factor Binding Protein 1	Protein Coding	43	GC07P046936	19.5242	https://www.genecards.org/cgi-bin/carddisp.pl?gene=IGFBP1
MIRLET7D	MicroRNA Let-7d	RNA Gene	22	GC09P094178	19.5122	https://www.genecards.org/cgi-bin/carddisp.pl?gene=MIRLET7D
MIR451A	MicroRNA 451a	RNA Gene	19	GC17M028861	19.4059	https://www.genecards.org/cgi-bin/carddisp.pl?gene=MIR451A
CEL	Carboxyl Ester Lipase	Protein Coding	47	GC09P133061	19.3948	https://www.genecards.org/cgi-bin/carddisp.pl?gene=CEL
UQCRB	Ubiquinol-Cytochrome C Reductase Binding Protein	Protein Coding	44	GC08M096225	19.3697	https://www.genecards.org/cgi-bin/carddisp.pl?gene=UQCRB
NAT2	N-Acetyltransferase 2	Protein Coding	43	GC08P018391	19.3655	https://www.genecards.org/cgi-bin/carddisp.pl?gene=NAT2
GLUD1	Glutamate Dehydrogenase 1	Protein Coding	50	GC10M087050	19.3174	https://www.genecards.org/cgi-bin/carddisp.pl?gene=GLUD1
SLC6A3	Solute Carrier Family 6 Member 3	Protein Coding	50	GC05M001392	19.2979	https://www.genecards.org/cgi-bin/carddisp.pl?gene=SLC6A3
CASP9	Caspase 9	Protein Coding	48	GC01M015491	19.2225	https://www.genecards.org/cgi-bin/carddisp.pl?gene=CASP9
GALE	UDP-Galactose-4-Epimerase	Protein Coding	44	GC01M023795	19.2152	https://www.genecards.org/cgi-bin/carddisp.pl?gene=GALE
IL18BP	Interleukin 18 Binding Protein	Protein Coding	39	GC11P071998	19.2118	https://www.genecards.org/cgi-bin/carddisp.pl?gene=IL18BP
MIRLET7C	MicroRNA Let-7c	RNA Gene	22	GC21P016551	19.209	https://www.genecards.org/cgi-bin/carddisp.pl?gene=MIRLET7C
MEG3	Maternally Expressed 3	RNA Gene	30	GC14P106791	19.192	https://www.genecards.org/cgi-bin/carddisp.pl?gene=MEG3
MIR26A1	MicroRNA 26a-1	RNA Gene	21	GC03P037969	19.0224	https://www.genecards.org/cgi-bin/carddisp.pl?gene=MIR26A1
SLC25A15	Solute Carrier Family 25 Member 15	Protein Coding	44	GC13P040789	18.981	https://www.genecards.org/cgi-bin/carddisp.pl?gene=SLC25A15
CHUK	Component Of Inhibitor Of Nuclear Factor Kappa B Kinase Complex	Protein Coding	52	GC10M100188	18.9173	https://www.genecards.org/cgi-bin/carddisp.pl?gene=CHUK
SLC6A4	Solute Carrier Family 6 Member 4	Protein Coding	48	GC17M030194	18.879	https://www.genecards.org/cgi-bin/carddisp.pl?gene=SLC6A4
COG2	Component Of Oligomeric Golgi Complex 2	Protein Coding	41	GC01P230642	18.8625	https://www.genecards.org/cgi-bin/carddisp.pl?gene=COG2
SCT	Secretin	Protein Coding	34	GC11M000626	18.8482	https://www.genecards.org/cgi-bin/carddisp.pl?gene=SCT
SPTAN1	Spectrin Alpha, Non-Erythrocytic 1	Protein Coding	48	GC09P128552	18.7665	https://www.genecards.org/cgi-bin/carddisp.pl?gene=SPTAN1
EIF4G1	Eukaryotic Translation Initiation Factor 4 Gamma 1	Protein Coding	46	GC03P184314	18.7079	https://www.genecards.org/cgi-bin/carddisp.pl?gene=EIF4G1
ECHS1	Enoyl-CoA Hydratase, Short Chain 1	Protein Coding	47	GC10M133362	18.6757	https://www.genecards.org/cgi-bin/carddisp.pl?gene=ECHS1
TIMP2	TIMP Metallopeptidase Inhibitor 2	Protein Coding	43	GC17M078852	18.6681	https://www.genecards.org/cgi-bin/carddisp.pl?gene=TIMP2
MIR33A	MicroRNA 33a	RNA Gene	19	GC22P041900	18.6223	https://www.genecards.org/cgi-bin/carddisp.pl?gene=MIR33A
CYP2U1	Cytochrome P450 Family 2 Subfamily U Member 1	Protein Coding	44	GC04P107931	18.6047	https://www.genecards.org/cgi-bin/carddisp.pl?gene=CYP2U1
EPRS1	Glutamyl-Prolyl-TRNA Synthetase 1	Protein Coding	36	GC01M219969	18.552	https://www.genecards.org/cgi-bin/carddisp.pl?gene=EPRS1
AGER	Advanced Glycosylation End-Product Specific Receptor	Protein Coding	44	GC06M032180	18.5206	https://www.genecards.org/cgi-bin/carddisp.pl?gene=AGER
TNFSF10	TNF Superfamily Member 10	Protein Coding	45	GC03M172505	18.515	https://www.genecards.org/cgi-bin/carddisp.pl?gene=TNFSF10
SOST	Sclerostin	Protein Coding	43	GC17M043753	18.4907	https://www.genecards.org/cgi-bin/carddisp.pl?gene=SOST
DKK1	Dickkopf WNT Signaling Pathway Inhibitor 1	Protein Coding	44	GC10P052314	18.4566	https://www.genecards.org/cgi-bin/carddisp.pl?gene=DKK1
MIR183	MicroRNA 183	RNA Gene	18	GC07M129801	18.4014	https://www.genecards.org/cgi-bin/carddisp.pl?gene=MIR183
MIR142	MicroRNA 142	RNA Gene	20	GC17M058331	18.3906	https://www.genecards.org/cgi-bin/carddisp.pl?gene=MIR142
LGALS3	Galectin 3	Protein Coding	44	GC14P055124	18.3469	https://www.genecards.org/cgi-bin/carddisp.pl?gene=LGALS3
UCP3	Uncoupling Protein 3	Protein Coding	43	GC11M074000	18.3235	https://www.genecards.org/cgi-bin/carddisp.pl?gene=UCP3
CYP3A5	Cytochrome P450 Family 3 Subfamily A Member 5	Protein Coding	48	GC07M099648	18.305	https://www.genecards.org/cgi-bin/carddisp.pl?gene=CYP3A5
ACHE	Acetylcholinesterase (Cartwright Blood Group)	Protein Coding	46	GC07M100889	18.2722	https://www.genecards.org/cgi-bin/carddisp.pl?gene=ACHE
SETD2	SET Domain Containing 2, Histone Lysine Methyltransferase	Protein Coding	47	GC03M047033	18.1821	https://www.genecards.org/cgi-bin/carddisp.pl?gene=SETD2
GRIN2A	Glutamate Ionotropic Receptor NMDA Type Subunit 2A	Protein Coding	52	GC16M009753	18.1511	https://www.genecards.org/cgi-bin/carddisp.pl?gene=GRIN2A
MAT1A	Methionine Adenosyltransferase 1A	Protein Coding	47	GC10M080271	18.0907	https://www.genecards.org/cgi-bin/carddisp.pl?gene=MAT1A
GC	GC Vitamin D Binding Protein	Protein Coding	43	GC04M071741	18.0785	https://www.genecards.org/cgi-bin/carddisp.pl?gene=GC
GNMT	Glycine N-Methyltransferase	Protein Coding	45	GC06P042960	18.0735	https://www.genecards.org/cgi-bin/carddisp.pl?gene=GNMT
YAP1	Yes1 Associated Transcriptional Regulator	Protein Coding	48	GC11P102110	18.0623	https://www.genecards.org/cgi-bin/carddisp.pl?gene=YAP1
FGFR4	Fibroblast Growth Factor Receptor 4	Protein Coding	51	GC05P177086	18.0116	https://www.genecards.org/cgi-bin/carddisp.pl?gene=FGFR4
DRD2	Dopamine Receptor D2	Protein Coding	50	GC11M113409	17.9827	https://www.genecards.org/cgi-bin/carddisp.pl?gene=DRD2
PARP1	Poly(ADP-Ribose) Polymerase 1	Protein Coding	49	GC01M226360	17.9484	https://www.genecards.org/cgi-bin/carddisp.pl?gene=PARP1
SP1	Sp1 Transcription Factor	Protein Coding	44	GC12P053380	17.9176	https://www.genecards.org/cgi-bin/carddisp.pl?gene=SP1
MIR192	MicroRNA 192	RNA Gene	22	GC11M064891	17.891	https://www.genecards.org/cgi-bin/carddisp.pl?gene=MIR192
PRKAA2	Protein Kinase AMP-Activated Catalytic Subunit Alpha 2	Protein Coding	50	GC01P056645	17.868	https://www.genecards.org/cgi-bin/carddisp.pl?gene=PRKAA2
CREB1	CAMP Responsive Element Binding Protein 1	Protein Coding	49	GC02P207529	17.7987	https://www.genecards.org/cgi-bin/carddisp.pl?gene=CREB1
PRSS1	Serine Protease 1	Protein Coding	45	GC07P146073	17.7893	https://www.genecards.org/cgi-bin/carddisp.pl?gene=PRSS1
GSR	Glutathione-Disulfide Reductase	Protein Coding	49	GC08M030678	17.5979	https://www.genecards.org/cgi-bin/carddisp.pl?gene=GSR
MIR429	MicroRNA 429	RNA Gene	20	GC01P002224	17.5833	https://www.genecards.org/cgi-bin/carddisp.pl?gene=MIR429
GSTT1	Glutathione S-Transferase Theta 1	Protein Coding	33	GC22Mi00270	17.5635	https://www.genecards.org/cgi-bin/carddisp.pl?gene=GSTT1
NPC1L1	NPC1 Like Intracellular Cholesterol Transporter 1	Protein Coding	44	GC07M044512	17.5444	https://www.genecards.org/cgi-bin/carddisp.pl?gene=NPC1L1
MIRLET7E	MicroRNA Let-7e	RNA Gene	20	GC19P051718	17.5078	https://www.genecards.org/cgi-bin/carddisp.pl?gene=MIRLET7E
GCLC	Glutamate-Cysteine Ligase Catalytic Subunit	Protein Coding	44	GC06M053497	17.4865	https://www.genecards.org/cgi-bin/carddisp.pl?gene=GCLC
NR0B2	Nuclear Receptor Subfamily 0 Group B Member 2	Protein Coding	44	GC01M026922	17.4769	https://www.genecards.org/cgi-bin/carddisp.pl?gene=NR0B2
CEBPB	CCAAT Enhancer Binding Protein Beta	Protein Coding	44	GC20P050190	17.4746	https://www.genecards.org/cgi-bin/carddisp.pl?gene=CEBPB
TMPRSS6	Transmembrane Serine Protease 6	Protein Coding	44	GC22M037066	17.3324	https://www.genecards.org/cgi-bin/carddisp.pl?gene=TMPRSS6
MIR151A	MicroRNA 151a	RNA Gene	18	GC08M140733	17.3284	https://www.genecards.org/cgi-bin/carddisp.pl?gene=MIR151A
SAA1	Serum Amyloid A1	Protein Coding	41	GC11P018267	17.2823	https://www.genecards.org/cgi-bin/carddisp.pl?gene=SAA1
LRPPRC	Leucine Rich Pentatricopeptide Repeat Containing	Protein Coding	43	GC02M043850	17.2804	https://www.genecards.org/cgi-bin/carddisp.pl?gene=LRPPRC
GPX1	Glutathione Peroxidase 1	Protein Coding	47	GC03M049537	17.2401	https://www.genecards.org/cgi-bin/carddisp.pl?gene=GPX1
HSD11B1	Hydroxysteroid 11-Beta Dehydrogenase 1	Protein Coding	50	GC01P209686	17.22	https://www.genecards.org/cgi-bin/carddisp.pl?gene=HSD11B1
HBG2	Hemoglobin Subunit Gamma 2	Protein Coding	41	GC11M005469	17.1932	https://www.genecards.org/cgi-bin/carddisp.pl?gene=HBG2
MBP	Myelin Basic Protein	Protein Coding	44	GC18M076978	17.1559	https://www.genecards.org/cgi-bin/carddisp.pl?gene=MBP
NR1I3	Nuclear Receptor Subfamily 1 Group I Member 3	Protein Coding	45	GC01M161229	17.141	https://www.genecards.org/cgi-bin/carddisp.pl?gene=NR1I3
LOC110806263	TERT 5' Regulatory Region	Biological Region	2	GC05P001294	17.0558	https://www.genecards.org/cgi-bin/carddisp.pl?gene=LOC110806263
HSP90AA1	Heat Shock Protein 90 Alpha Family Class A Member 1	Protein Coding	47	GC14M102080	16.9738	https://www.genecards.org/cgi-bin/carddisp.pl?gene=HSP90AA1
S100A9	S100 Calcium Binding Protein A9	Protein Coding	42	GC01P153357	16.973	https://www.genecards.org/cgi-bin/carddisp.pl?gene=S100A9
CD274	CD274 Molecule	Protein Coding	44	GC09P005450	16.9668	https://www.genecards.org/cgi-bin/carddisp.pl?gene=CD274
ABCC3	ATP Binding Cassette Subfamily C Member 3	Protein Coding	46	GC17P050634	16.9236	https://www.genecards.org/cgi-bin/carddisp.pl?gene=ABCC3
CCK	Cholecystokinin	Protein Coding	42	GC03M042274	16.9176	https://www.genecards.org/cgi-bin/carddisp.pl?gene=CCK
SERPINH1	Serpin Family H Member 1	Protein Coding	45	GC11P075562	16.89	https://www.genecards.org/cgi-bin/carddisp.pl?gene=SERPINH1
RPS27A	Ribosomal Protein S27a	Protein Coding	43	GC02P055231	16.8076	https://www.genecards.org/cgi-bin/carddisp.pl?gene=RPS27A
LTBP3	Latent Transforming Growth Factor Beta Binding Protein 3	Protein Coding	41	GC11M065538	16.7808	https://www.genecards.org/cgi-bin/carddisp.pl?gene=LTBP3
HMGB1	High Mobility Group Box 1	Protein Coding	44	GC13M030456	16.631	https://www.genecards.org/cgi-bin/carddisp.pl?gene=HMGB1
MIR9-1	MicroRNA 9-1	RNA Gene	21	GC01M156420	16.6301	https://www.genecards.org/cgi-bin/carddisp.pl?gene=MIR9-1
FGB	Fibrinogen Beta Chain	Protein Coding	46	GC04P154575	16.5862	https://www.genecards.org/cgi-bin/carddisp.pl?gene=FGB
ANGPTL3	Angiopoietin Like 3	Protein Coding	45	GC01P062597	16.5657	https://www.genecards.org/cgi-bin/carddisp.pl?gene=ANGPTL3
MIR378A	MicroRNA 378a	RNA Gene	19	GC05P149732	16.4392	https://www.genecards.org/cgi-bin/carddisp.pl?gene=MIR378A
GOT2	Glutamic-Oxaloacetic Transaminase 2	Protein Coding	46	GC16M058707	16.4256	https://www.genecards.org/cgi-bin/carddisp.pl?gene=GOT2
SIRT3	Sirtuin 3	Protein Coding	47	GC11M000215	16.3561	https://www.genecards.org/cgi-bin/carddisp.pl?gene=SIRT3
SERPINF1	Serpin Family F Member 1	Protein Coding	44	GC17P001761	16.3229	https://www.genecards.org/cgi-bin/carddisp.pl?gene=SERPINF1
KHK	Ketohexokinase	Protein Coding	44	GC02P027086	16.3004	https://www.genecards.org/cgi-bin/carddisp.pl?gene=KHK
MAOA	Monoamine Oxidase A	Protein Coding	50	GC0XP043654	16.2676	https://www.genecards.org/cgi-bin/carddisp.pl?gene=MAOA
MATR3	Matrin 3	Protein Coding	43	GC05P139274	16.2407	https://www.genecards.org/cgi-bin/carddisp.pl?gene=MATR3
ADCY10	Adenylate Cyclase 10	Protein Coding	45	GC01M167809	16.1802	https://www.genecards.org/cgi-bin/carddisp.pl?gene=ADCY10
AKR1A1	Aldo-Keto Reductase Family 1 Member A1	Protein Coding	44	GC01P045550	16.0439	https://www.genecards.org/cgi-bin/carddisp.pl?gene=AKR1A1
GOLM1	Golgi Membrane Protein 1	Protein Coding	38	GC09M086026	16.027	https://www.genecards.org/cgi-bin/carddisp.pl?gene=GOLM1
ADRB3	Adrenoceptor Beta 3	Protein Coding	45	GC08M037962	16.0071	https://www.genecards.org/cgi-bin/carddisp.pl?gene=ADRB3
FNDC5	Fibronectin Type III Domain Containing 5	Protein Coding	33	GC01M032877	15.9579	https://www.genecards.org/cgi-bin/carddisp.pl?gene=FNDC5
ATP1A1	ATPase Na+/K+ Transporting Subunit Alpha 1	Protein Coding	50	GC01P116372	15.9323	https://www.genecards.org/cgi-bin/carddisp.pl?gene=ATP1A1
PLIN1	Perilipin 1	Protein Coding	45	GC15M089664	15.9228	https://www.genecards.org/cgi-bin/carddisp.pl?gene=PLIN1
IFNL3	Interferon Lambda 3	Protein Coding	34	GC19M039243	15.8826	https://www.genecards.org/cgi-bin/carddisp.pl?gene=IFNL3
MERTK	MER Proto-Oncogene, Tyrosine Kinase	Protein Coding	50	GC02P111898	15.8758	https://www.genecards.org/cgi-bin/carddisp.pl?gene=MERTK
FOXO1	Forkhead Box O1	Protein Coding	48	GC13M040555	15.8225	https://www.genecards.org/cgi-bin/carddisp.pl?gene=FOXO1
MIR30D	MicroRNA 30d	RNA Gene	18	GC08M134804	15.8133	https://www.genecards.org/cgi-bin/carddisp.pl?gene=MIR30D
MAOB	Monoamine Oxidase B	Protein Coding	43	GC0XM043766	15.8062	https://www.genecards.org/cgi-bin/carddisp.pl?gene=MAOB
IRGM	Immunity Related GTPase M	Protein Coding	37	GC05P150846	15.7332	https://www.genecards.org/cgi-bin/carddisp.pl?gene=IRGM
PLTP	Phospholipid Transfer Protein	Protein Coding	43	GC20M045898	15.7296	https://www.genecards.org/cgi-bin/carddisp.pl?gene=PLTP
DDX3X	DEAD-Box Helicase 3 X-Linked	Protein Coding	47	GC0XP041333	15.648	https://www.genecards.org/cgi-bin/carddisp.pl?gene=DDX3X
PRL	Prolactin	Protein Coding	43	GC06M022287	15.6377	https://www.genecards.org/cgi-bin/carddisp.pl?gene=PRL
ALOX12	Arachidonate 12-Lipoxygenase, 12S Type	Protein Coding	44	GC17P006995	15.4712	https://www.genecards.org/cgi-bin/carddisp.pl?gene=ALOX12
GSS	Glutathione Synthetase	Protein Coding	46	GC20M034928	15.4526	https://www.genecards.org/cgi-bin/carddisp.pl?gene=GSS
HTR2A	5-Hydroxytryptamine Receptor 2A	Protein Coding	48	GC13M046831	15.4179	https://www.genecards.org/cgi-bin/carddisp.pl?gene=HTR2A
AVP	Arginine Vasopressin	Protein Coding	46	GC20M003082	15.4093	https://www.genecards.org/cgi-bin/carddisp.pl?gene=AVP
DNASE1	Deoxyribonuclease 1	Protein Coding	42	GC16P003611	15.3809	https://www.genecards.org/cgi-bin/carddisp.pl?gene=DNASE1
FARSA	Phenylalanyl-TRNA Synthetase Subunit Alpha	Protein Coding	41	GC19M012922	15.3531	https://www.genecards.org/cgi-bin/carddisp.pl?gene=FARSA
STX1A	Syntaxin 1A	Protein Coding	47	GC07M073700	15.3006	https://www.genecards.org/cgi-bin/carddisp.pl?gene=STX1A
CCL4	C-C Motif Chemokine Ligand 4	Protein Coding	40	GC17P036103	15.2832	https://www.genecards.org/cgi-bin/carddisp.pl?gene=CCL4
GDF15	Growth Differentiation Factor 15	Protein Coding	41	GC19P027797	15.1714	https://www.genecards.org/cgi-bin/carddisp.pl?gene=GDF15
CFTR-AS1	CFTR Antisense RNA 1	RNA Gene	10	GC07M117561	15.0961	https://www.genecards.org/cgi-bin/carddisp.pl?gene=CFTR-AS1
CYP2C8	Cytochrome P450 Family 2 Subfamily C Member 8	Protein Coding	48	GC10M095038	15.0199	https://www.genecards.org/cgi-bin/carddisp.pl?gene=CYP2C8
PCNA	Proliferating Cell Nuclear Antigen	Protein Coding	51	GC20M005114	14.9435	https://www.genecards.org/cgi-bin/carddisp.pl?gene=PCNA
KLF6	Kruppel Like Factor 6	Protein Coding	43	GC10M003779	14.9199	https://www.genecards.org/cgi-bin/carddisp.pl?gene=KLF6
MIR27B	MicroRNA 27b	RNA Gene	21	GC09P095097	14.8552	https://www.genecards.org/cgi-bin/carddisp.pl?gene=MIR27B
APOA4	Apolipoprotein A4	Protein Coding	42	GC11M116820	14.7904	https://www.genecards.org/cgi-bin/carddisp.pl?gene=APOA4
SNAI2	Snail Family Transcriptional Repressor 2	Protein Coding	44	GC08M048917	14.7763	https://www.genecards.org/cgi-bin/carddisp.pl?gene=SNAI2
CYP17A1	Cytochrome P450 Family 17 Subfamily A Member 1	Protein Coding	49	GC10M102830	14.747	https://www.genecards.org/cgi-bin/carddisp.pl?gene=CYP17A1
MYH14	Myosin Heavy Chain 14	Protein Coding	45	GC19P050200	14.7088	https://www.genecards.org/cgi-bin/carddisp.pl?gene=MYH14
CYP4F2	Cytochrome P450 Family 4 Subfamily F Member 2	Protein Coding	45	GC19M015878	14.684	https://www.genecards.org/cgi-bin/carddisp.pl?gene=CYP4F2
TPM2	Tropomyosin 2	Protein Coding	45	GC09M035672	14.6767	https://www.genecards.org/cgi-bin/carddisp.pl?gene=TPM2
CD68	CD68 Molecule	Protein Coding	39	GC17P007579	14.6506	https://www.genecards.org/cgi-bin/carddisp.pl?gene=CD68
TFAP2A	Transcription Factor AP-2 Alpha	Protein Coding	47	GC06M010393	14.6432	https://www.genecards.org/cgi-bin/carddisp.pl?gene=TFAP2A
IL6ST	Interleukin 6 Cytokine Family Signal Transducer	Protein Coding	47	GC05M055935	14.612	https://www.genecards.org/cgi-bin/carddisp.pl?gene=IL6ST
KEAP1	Kelch Like ECH Associated Protein 1	Protein Coding	48	GC19M010486	14.6039	https://www.genecards.org/cgi-bin/carddisp.pl?gene=KEAP1
NEAT1	Nuclear Paraspeckle Assembly Transcript 1	RNA Gene	23	GC11P066811	14.5843	https://www.genecards.org/cgi-bin/carddisp.pl?gene=NEAT1
SMAD7	SMAD Family Member 7	Protein Coding	43	GC18M048919	14.5718	https://www.genecards.org/cgi-bin/carddisp.pl?gene=SMAD7
LEPQTL1	Leptin, Serum Levels Of	Genetic Locus	2	GC02U903086	14.5498	https://www.genecards.org/cgi-bin/carddisp.pl?gene=LEPQTL1
CES2	Carboxylesterase 2	Protein Coding	44	GC16P066934	14.542	https://www.genecards.org/cgi-bin/carddisp.pl?gene=CES2
CCL20	C-C Motif Chemokine Ligand 20	Protein Coding	43	GC02P227820	14.4631	https://www.genecards.org/cgi-bin/carddisp.pl?gene=CCL20
ADD1	Adducin 1	Protein Coding	44	GC04P002855	14.4397	https://www.genecards.org/cgi-bin/carddisp.pl?gene=ADD1
PEPD	Peptidase D	Protein Coding	45	GC19M033386	14.3936	https://www.genecards.org/cgi-bin/carddisp.pl?gene=PEPD
THBS1	Thrombospondin 1	Protein Coding	44	GC15P039581	14.3793	https://www.genecards.org/cgi-bin/carddisp.pl?gene=THBS1
HDAC8	Histone Deacetylase 8	Protein Coding	47	GC0XM072329	14.3698	https://www.genecards.org/cgi-bin/carddisp.pl?gene=HDAC8
GAST	Gastrin	Protein Coding	40	GC17P041712	14.3434	https://www.genecards.org/cgi-bin/carddisp.pl?gene=GAST
MGMT	O-6-Methylguanine-DNA Methyltransferase	Protein Coding	49	GC10P129467	14.3352	https://www.genecards.org/cgi-bin/carddisp.pl?gene=MGMT
UBD	Ubiquitin D	Protein Coding	38	GC06M048986	14.288	https://www.genecards.org/cgi-bin/carddisp.pl?gene=UBD
RPS6KA3	Ribosomal Protein S6 Kinase A3	Protein Coding	52	GC0XM020149	14.2587	https://www.genecards.org/cgi-bin/carddisp.pl?gene=RPS6KA3
IL22	Interleukin 22	Protein Coding	41	GC12M068248	14.0009	https://www.genecards.org/cgi-bin/carddisp.pl?gene=IL22
IRF3	Interferon Regulatory Factor 3	Protein Coding	46	GC19M049659	13.9487	https://www.genecards.org/cgi-bin/carddisp.pl?gene=IRF3
FDFT1	Farnesyl-Diphosphate Farnesyltransferase 1	Protein Coding	45	GC08P011795	13.9267	https://www.genecards.org/cgi-bin/carddisp.pl?gene=FDFT1
NAGS	N-Acetylglutamate Synthase	Protein Coding	42	GC17P044004	13.8978	https://www.genecards.org/cgi-bin/carddisp.pl?gene=NAGS
HCFC1	Host Cell Factor C1	Protein Coding	47	GC0XM153947	13.8884	https://www.genecards.org/cgi-bin/carddisp.pl?gene=HCFC1
PNLIP	Pancreatic Lipase	Protein Coding	48	GC10P116545	13.6801	https://www.genecards.org/cgi-bin/carddisp.pl?gene=PNLIP
CD59	CD59 Molecule (CD59 Blood Group)	Protein Coding	45	GC11M033704	13.6625	https://www.genecards.org/cgi-bin/carddisp.pl?gene=CD59
MIR24-1	MicroRNA 24-1	RNA Gene	19	GC09P095086	13.6424	https://www.genecards.org/cgi-bin/carddisp.pl?gene=MIR24-1
PRDX1	Peroxiredoxin 1	Protein Coding	48	GC01M045511	13.634	https://www.genecards.org/cgi-bin/carddisp.pl?gene=PRDX1
STAT5A	Signal Transducer And Activator Of Transcription 5A	Protein Coding	46	GC17P042287	13.6213	https://www.genecards.org/cgi-bin/carddisp.pl?gene=STAT5A
CANX	Calnexin	Protein Coding	44	GC05P179678	13.5891	https://www.genecards.org/cgi-bin/carddisp.pl?gene=CANX
CRH	Corticotropin Releasing Hormone	Protein Coding	44	GC08M066176	13.5197	https://www.genecards.org/cgi-bin/carddisp.pl?gene=CRH
GPC4	Glypican 4	Protein Coding	45	GC0XM133300	13.5186	https://www.genecards.org/cgi-bin/carddisp.pl?gene=GPC4
TXN	Thioredoxin	Protein Coding	45	GC09M110243	13.5173	https://www.genecards.org/cgi-bin/carddisp.pl?gene=TXN
FOXA2	Forkhead Box A2	Protein Coding	45	GC20M022581	13.4385	https://www.genecards.org/cgi-bin/carddisp.pl?gene=FOXA2
TSPO	Translocator Protein	Protein Coding	43	GC22P043151	13.3288	https://www.genecards.org/cgi-bin/carddisp.pl?gene=TSPO
HNRNPK	Heterogeneous Nuclear Ribonucleoprotein K	Protein Coding	45	GC09M086732	13.3236	https://www.genecards.org/cgi-bin/carddisp.pl?gene=HNRNPK
OLR1	Oxidized Low Density Lipoprotein Receptor 1	Protein Coding	43	GC12M016311	13.3203	https://www.genecards.org/cgi-bin/carddisp.pl?gene=OLR1
ATF6	Activating Transcription Factor 6	Protein Coding	47	GC01P161766	13.279	https://www.genecards.org/cgi-bin/carddisp.pl?gene=ATF6
CLTC	Clathrin Heavy Chain	Protein Coding	46	GC17P059619	13.2772	https://www.genecards.org/cgi-bin/carddisp.pl?gene=CLTC
GPBAR1	G Protein-Coupled Bile Acid Receptor 1	Protein Coding	39	GC02P218259	13.2372	https://www.genecards.org/cgi-bin/carddisp.pl?gene=GPBAR1
RB1CC1	RB1 Inducible Coiled-Coil 1	Protein Coding	43	GC08M052622	13.2281	https://www.genecards.org/cgi-bin/carddisp.pl?gene=RB1CC1
ANXA2	Annexin A2	Protein Coding	48	GC15M060347	13.0512	https://www.genecards.org/cgi-bin/carddisp.pl?gene=ANXA2
WNT3A	Wnt Family Member 3A	Protein Coding	47	GC01P228554	13.0161	https://www.genecards.org/cgi-bin/carddisp.pl?gene=WNT3A
IARS1	Isoleucyl-TRNA Synthetase 1	Protein Coding	35	GC09M092211	13.0035	https://www.genecards.org/cgi-bin/carddisp.pl?gene=IARS1
TPM3	Tropomyosin 3	Protein Coding	46	GC01M154127	13.0025	https://www.genecards.org/cgi-bin/carddisp.pl?gene=TPM3
FOXO3	Forkhead Box O3	Protein Coding	44	GC06P108559	12.9912	https://www.genecards.org/cgi-bin/carddisp.pl?gene=FOXO3
POSTN	Periostin	Protein Coding	43	GC13M037562	12.98	https://www.genecards.org/cgi-bin/carddisp.pl?gene=POSTN
ANGPTL8	Angiopoietin Like 8	Protein Coding	27	GC19P011238	12.8826	https://www.genecards.org/cgi-bin/carddisp.pl?gene=ANGPTL8
DHCR24	24-Dehydrocholesterol Reductase	Protein Coding	45	GC01M054849	12.8794	https://www.genecards.org/cgi-bin/carddisp.pl?gene=DHCR24
MBOAT7	Membrane Bound O-Acyltransferase Domain Containing 7	Protein Coding	41	GC19M054173	12.8306	https://www.genecards.org/cgi-bin/carddisp.pl?gene=MBOAT7
CTRC	Chymotrypsin C	Protein Coding	44	GC01P015438	12.8291	https://www.genecards.org/cgi-bin/carddisp.pl?gene=CTRC
IHH	Indian Hedgehog Signaling Molecule	Protein Coding	47	GC02M219054	12.8205	https://www.genecards.org/cgi-bin/carddisp.pl?gene=IHH
TPM1	Tropomyosin 1	Protein Coding	50	GC15P080570	12.8019	https://www.genecards.org/cgi-bin/carddisp.pl?gene=TPM1
IGFBP2	Insulin Like Growth Factor Binding Protein 2	Protein Coding	43	GC02P216632	12.7743	https://www.genecards.org/cgi-bin/carddisp.pl?gene=IGFBP2
CCR2	C-C Motif Chemokine Receptor 2	Protein Coding	44	GC03P046356	12.7401	https://www.genecards.org/cgi-bin/carddisp.pl?gene=CCR2
TBX20	T-Box Transcription Factor 20	Protein Coding	42	GC07M035237	12.7336	https://www.genecards.org/cgi-bin/carddisp.pl?gene=TBX20
GAD1	Glutamate Decarboxylase 1	Protein Coding	51	GC02P170813	12.69	https://www.genecards.org/cgi-bin/carddisp.pl?gene=GAD1
CFLAR	CASP8 And FADD Like Apoptosis Regulator	Protein Coding	45	GC02P201117	12.6824	https://www.genecards.org/cgi-bin/carddisp.pl?gene=CFLAR
ARPC1B	Actin Related Protein 2/3 Complex Subunit 1B	Protein Coding	44	GC07P099374	12.6752	https://www.genecards.org/cgi-bin/carddisp.pl?gene=ARPC1B
NTS	Neurotensin	Protein Coding	40	GC12P085876	12.6707	https://www.genecards.org/cgi-bin/carddisp.pl?gene=NTS
STUB1	STIP1 Homology And U-Box Containing Protein 1	Protein Coding	45	GC16P006127	12.6405	https://www.genecards.org/cgi-bin/carddisp.pl?gene=STUB1
MAP3K7	Mitogen-Activated Protein Kinase Kinase Kinase 7	Protein Coding	51	GC06M090513	12.6203	https://www.genecards.org/cgi-bin/carddisp.pl?gene=MAP3K7
PKM	Pyruvate Kinase M1/2	Protein Coding	45	GC15M072199	12.5649	https://www.genecards.org/cgi-bin/carddisp.pl?gene=PKM
RPL5	Ribosomal Protein L5	Protein Coding	47	GC01P092832	12.5614	https://www.genecards.org/cgi-bin/carddisp.pl?gene=RPL5
DPM1	Dolichyl-Phosphate Mannosyltransferase Subunit 1, Catalytic	Protein Coding	44	GC20M050934	12.558	https://www.genecards.org/cgi-bin/carddisp.pl?gene=DPM1
SF3B1	Splicing Factor 3b Subunit 1	Protein Coding	45	GC02M197396	12.5385	https://www.genecards.org/cgi-bin/carddisp.pl?gene=SF3B1
E2F1	E2F Transcription Factor 1	Protein Coding	44	GC20M033675	12.5003	https://www.genecards.org/cgi-bin/carddisp.pl?gene=E2F1
SLC25A1	Solute Carrier Family 25 Member 1	Protein Coding	47	GC22M019177	12.4968	https://www.genecards.org/cgi-bin/carddisp.pl?gene=SLC25A1
CIDEC	Cell Death Inducing DFFA Like Effector C	Protein Coding	41	GC03M009866	12.3749	https://www.genecards.org/cgi-bin/carddisp.pl?gene=CIDEC
DRD4	Dopamine Receptor D4	Protein Coding	47	GC11P001061	12.3706	https://www.genecards.org/cgi-bin/carddisp.pl?gene=DRD4
ERLIN1	ER Lipid Raft Associated 1	Protein Coding	42	GC10M100150	12.3333	https://www.genecards.org/cgi-bin/carddisp.pl?gene=ERLIN1
VTN	Vitronectin	Protein Coding	43	GC17M031461	12.3284	https://www.genecards.org/cgi-bin/carddisp.pl?gene=VTN
LPIN1	Lipin 1	Protein Coding	48	GC02P011677	12.296	https://www.genecards.org/cgi-bin/carddisp.pl?gene=LPIN1
HUWE1	HECT, UBA And WWE Domain Containing E3 Ubiquitin Protein Ligase 1	Protein Coding	44	GC0XM053532	12.2533	https://www.genecards.org/cgi-bin/carddisp.pl?gene=HUWE1
PALLD	Palladin, Cytoskeletal Associated Protein	Protein Coding	43	GC04P168497	12.2368	https://www.genecards.org/cgi-bin/carddisp.pl?gene=PALLD
PHGDH	Phosphoglycerate Dehydrogenase	Protein Coding	50	GC01P119660	12.232	https://www.genecards.org/cgi-bin/carddisp.pl?gene=PHGDH
FTO	FTO Alpha-Ketoglutarate Dependent Dioxygenase	Protein Coding	45	GC16P053737	12.2316	https://www.genecards.org/cgi-bin/carddisp.pl?gene=FTO
PTPN1	Protein Tyrosine Phosphatase Non-Receptor Type 1	Protein Coding	50	GC20P050510	12.205	https://www.genecards.org/cgi-bin/carddisp.pl?gene=PTPN1
EGR1	Early Growth Response 1	Protein Coding	43	GC05P138465	12.1758	https://www.genecards.org/cgi-bin/carddisp.pl?gene=EGR1
STING1	Stimulator Of Interferon Response CGAMP Interactor 1	Protein Coding	34	GC05M139476	12.1706	https://www.genecards.org/cgi-bin/carddisp.pl?gene=STING1
SCAP	SREBF Chaperone	Protein Coding	41	GC03M047413	12.1567	https://www.genecards.org/cgi-bin/carddisp.pl?gene=SCAP
PTX3	Pentraxin 3	Protein Coding	41	GC03P157436	12.156	https://www.genecards.org/cgi-bin/carddisp.pl?gene=PTX3
IL11	Interleukin 11	Protein Coding	40	GC19M055364	12.1552	https://www.genecards.org/cgi-bin/carddisp.pl?gene=IL11
ADH5	Alcohol Dehydrogenase 5 (Class III), Chi Polypeptide	Protein Coding	47	GC04M099070	12.0967	https://www.genecards.org/cgi-bin/carddisp.pl?gene=ADH5
CLOCK	Clock Circadian Regulator	Protein Coding	44	GC04M055427	12.0435	https://www.genecards.org/cgi-bin/carddisp.pl?gene=CLOCK
MAG	Myelin Associated Glycoprotein	Protein Coding	45	GC19P035292	11.9769	https://www.genecards.org/cgi-bin/carddisp.pl?gene=MAG
UBQLN4	Ubiquilin 4	Protein Coding	40	GC01M156033	11.895	https://www.genecards.org/cgi-bin/carddisp.pl?gene=UBQLN4
CXCR2	C-X-C Motif Chemokine Receptor 2	Protein Coding	48	GC02P218125	11.8328	https://www.genecards.org/cgi-bin/carddisp.pl?gene=CXCR2
LNCARSR	LncRNA Regulator Of Akt Signaling Associated With HCC And RCC	RNA Gene	11	GC09M079507	11.7901	https://www.genecards.org/cgi-bin/carddisp.pl?gene=LNCARSR
MIR26B	MicroRNA 26b	RNA Gene	22	GC02P218402	11.7024	https://www.genecards.org/cgi-bin/carddisp.pl?gene=MIR26B
MPI	Mannose Phosphate Isomerase	Protein Coding	44	GC15P074890	11.6159	https://www.genecards.org/cgi-bin/carddisp.pl?gene=MPI
MIR154	MicroRNA 154	RNA Gene	19	GC14P106798	11.579	https://www.genecards.org/cgi-bin/carddisp.pl?gene=MIR154
PRPF8	Pre-MRNA Processing Factor 8	Protein Coding	41	GC17M001650	11.5621	https://www.genecards.org/cgi-bin/carddisp.pl?gene=PRPF8
RARS1	Arginyl-TRNA Synthetase 1	Protein Coding	36	GC05P168487	11.5494	https://www.genecards.org/cgi-bin/carddisp.pl?gene=RARS1
FGL1	Fibrinogen Like 1	Protein Coding	40	GC08M017864	11.5375	https://www.genecards.org/cgi-bin/carddisp.pl?gene=FGL1
FBXW7	F-Box And WD Repeat Domain Containing 7	Protein Coding	45	GC04M152321	11.4741	https://www.genecards.org/cgi-bin/carddisp.pl?gene=FBXW7
TJP1	Tight Junction Protein 1	Protein Coding	44	GC15M029699	11.4658	https://www.genecards.org/cgi-bin/carddisp.pl?gene=TJP1
HNRNPU	Heterogeneous Nuclear Ribonucleoprotein U	Protein Coding	43	GC01M244844	11.4633	https://www.genecards.org/cgi-bin/carddisp.pl?gene=HNRNPU
SLC25A12	Solute Carrier Family 25 Member 12	Protein Coding	47	GC02M171783	11.4584	https://www.genecards.org/cgi-bin/carddisp.pl?gene=SLC25A12
CNP	2',3'-Cyclic Nucleotide 3' Phosphodiesterase	Protein Coding	43	GC17P041966	11.4457	https://www.genecards.org/cgi-bin/carddisp.pl?gene=CNP
SOD3	Superoxide Dismutase 3	Protein Coding	41	GC04P024798	11.4032	https://www.genecards.org/cgi-bin/carddisp.pl?gene=SOD3
JMJD1C	Jumonji Domain Containing 1C	Protein Coding	41	GC10M063167	11.398	https://www.genecards.org/cgi-bin/carddisp.pl?gene=JMJD1C
GAL	Galanin And GMAP Prepropeptide	Protein Coding	44	GC11P068684	11.3939	https://www.genecards.org/cgi-bin/carddisp.pl?gene=GAL
P4HB	Prolyl 4-Hydroxylase Subunit Beta	Protein Coding	48	GC17M081843	11.3716	https://www.genecards.org/cgi-bin/carddisp.pl?gene=P4HB
TKT	Transketolase	Protein Coding	47	GC03M053224	11.3388	https://www.genecards.org/cgi-bin/carddisp.pl?gene=TKT
P2RX7	Purinergic Receptor P2X 7	Protein Coding	45	GC12P123863	11.3355	https://www.genecards.org/cgi-bin/carddisp.pl?gene=P2RX7
GREM1	Gremlin 1, DAN Family BMP Antagonist	Protein Coding	43	GC15P033371	11.334	https://www.genecards.org/cgi-bin/carddisp.pl?gene=GREM1
RASA1	RAS P21 Protein Activator 1	Protein Coding	47	GC05P087267	11.2998	https://www.genecards.org/cgi-bin/carddisp.pl?gene=RASA1
ADH4	Alcohol Dehydrogenase 4 (Class II), Pi Polypeptide	Protein Coding	44	GC04M099123	11.2834	https://www.genecards.org/cgi-bin/carddisp.pl?gene=ADH4
AOX1	Aldehyde Oxidase 1	Protein Coding	44	GC02P200585	11.2718	https://www.genecards.org/cgi-bin/carddisp.pl?gene=AOX1
SRD5A2	Steroid 5 Alpha-Reductase 2	Protein Coding	43	GC02M031522	11.2617	https://www.genecards.org/cgi-bin/carddisp.pl?gene=SRD5A2
ERLIN2	ER Lipid Raft Associated 2	Protein Coding	40	GC08P037736	11.1806	https://www.genecards.org/cgi-bin/carddisp.pl?gene=ERLIN2
OGDH	Oxoglutarate Dehydrogenase	Protein Coding	45	GC07P044606	11.0805	https://www.genecards.org/cgi-bin/carddisp.pl?gene=OGDH
EPAS1	Endothelial PAS Domain Protein 1	Protein Coding	49	GC02P046293	11.0331	https://www.genecards.org/cgi-bin/carddisp.pl?gene=EPAS1
MAPK9	Mitogen-Activated Protein Kinase 9	Protein Coding	48	GC05M180235	10.9721	https://www.genecards.org/cgi-bin/carddisp.pl?gene=MAPK9
H6PD	Hexose-6-Phosphate Dehydrogenase/Glucose 1-Dehydrogenase	Protein Coding	42	GC01P009234	10.9686	https://www.genecards.org/cgi-bin/carddisp.pl?gene=H6PD
COLGALT1	Collagen Beta(1-O)Galactosyltransferase 1	Protein Coding	37	GC19P017555	10.9487	https://www.genecards.org/cgi-bin/carddisp.pl?gene=COLGALT1
ANGPTL4	Angiopoietin Like 4	Protein Coding	44	GC19P008363	10.9285	https://www.genecards.org/cgi-bin/carddisp.pl?gene=ANGPTL4
IRF7	Interferon Regulatory Factor 7	Protein Coding	46	GC11M000612	10.8928	https://www.genecards.org/cgi-bin/carddisp.pl?gene=IRF7
USP18	Ubiquitin Specific Peptidase 18	Protein Coding	41	GC22P018149	10.8822	https://www.genecards.org/cgi-bin/carddisp.pl?gene=USP18
BIRC3	Baculoviral IAP Repeat Containing 3	Protein Coding	47	GC11P102317	10.8534	https://www.genecards.org/cgi-bin/carddisp.pl?gene=BIRC3
CUL3	Cullin 3	Protein Coding	47	GC02M224470	10.8296	https://www.genecards.org/cgi-bin/carddisp.pl?gene=CUL3
SLC25A22	Solute Carrier Family 25 Member 22	Protein Coding	40	GC11M001319	10.7892	https://www.genecards.org/cgi-bin/carddisp.pl?gene=SLC25A22
PDK4	Pyruvate Dehydrogenase Kinase 4	Protein Coding	46	GC07M095583	10.7868	https://www.genecards.org/cgi-bin/carddisp.pl?gene=PDK4
TRB	T Cell Receptor Beta Locus	Protein Coding	18	GC07P146323	10.7856	https://www.genecards.org/cgi-bin/carddisp.pl?gene=TRB
GFPT1	Glutamine--Fructose-6-Phosphate Transaminase 1	Protein Coding	46	GC02M069283	10.7796	https://www.genecards.org/cgi-bin/carddisp.pl?gene=GFPT1
CNR2	Cannabinoid Receptor 2	Protein Coding	45	GC01M023870	10.7732	https://www.genecards.org/cgi-bin/carddisp.pl?gene=CNR2
HNMT	Histamine N-Methyltransferase	Protein Coding	45	GC02P137964	10.7234	https://www.genecards.org/cgi-bin/carddisp.pl?gene=HNMT
WWTR1	WW Domain Containing Transcription Regulator 1	Protein Coding	41	GC03M149517	10.652	https://www.genecards.org/cgi-bin/carddisp.pl?gene=WWTR1
USF1	Upstream Transcription Factor 1	Protein Coding	43	GC01M161039	10.6248	https://www.genecards.org/cgi-bin/carddisp.pl?gene=USF1
NNMT	Nicotinamide N-Methyltransferase	Protein Coding	45	GC11P114257	10.5672	https://www.genecards.org/cgi-bin/carddisp.pl?gene=NNMT
RTN4	Reticulon 4	Protein Coding	44	GC02M054934	10.5455	https://www.genecards.org/cgi-bin/carddisp.pl?gene=RTN4
APLN	Apelin	Protein Coding	37	GC0XM129645	10.5392	https://www.genecards.org/cgi-bin/carddisp.pl?gene=APLN
NOX4	NADPH Oxidase 4	Protein Coding	42	GC11M089324	10.4835	https://www.genecards.org/cgi-bin/carddisp.pl?gene=NOX4
CYLD	CYLD Lysine 63 Deubiquitinase	Protein Coding	49	GC16P050742	10.4564	https://www.genecards.org/cgi-bin/carddisp.pl?gene=CYLD
NLRC4	NLR Family CARD Domain Containing 4	Protein Coding	44	GC02M032224	10.4521	https://www.genecards.org/cgi-bin/carddisp.pl?gene=NLRC4
CFL1	Cofilin 1	Protein Coding	45	GC11M065823	10.4269	https://www.genecards.org/cgi-bin/carddisp.pl?gene=CFL1
JAZF1	JAZF Zinc Finger 1	Protein Coding	38	GC07M027830	10.3895	https://www.genecards.org/cgi-bin/carddisp.pl?gene=JAZF1
CYGB	Cytoglobin	Protein Coding	38	GC17M076527	10.3723	https://www.genecards.org/cgi-bin/carddisp.pl?gene=CYGB
SNRNP200	Small Nuclear Ribonucleoprotein U5 Subunit 200	Protein Coding	41	GC02M096456	10.3631	https://www.genecards.org/cgi-bin/carddisp.pl?gene=SNRNP200
GPNMB	Glycoprotein Nmb	Protein Coding	43	GC07P023238	10.3213	https://www.genecards.org/cgi-bin/carddisp.pl?gene=GPNMB
TRIM21	Tripartite Motif Containing 21	Protein Coding	41	GC11M004384	10.3139	https://www.genecards.org/cgi-bin/carddisp.pl?gene=TRIM21
CPA1	Carboxypeptidase A1	Protein Coding	45	GC07P130380	10.2909	https://www.genecards.org/cgi-bin/carddisp.pl?gene=CPA1
JCAD	Junctional Cadherin 5 Associated	Protein Coding	25	GC10M030012	10.2906	https://www.genecards.org/cgi-bin/carddisp.pl?gene=JCAD
PRKCZ	Protein Kinase C Zeta	Protein Coding	49	GC01P002050	10.2175	https://www.genecards.org/cgi-bin/carddisp.pl?gene=PRKCZ
HSD17B13	Hydroxysteroid 17-Beta Dehydrogenase 13	Protein Coding	37	GC04M087303	10.2073	https://www.genecards.org/cgi-bin/carddisp.pl?gene=HSD17B13
TMPO	Thymopoietin	Protein Coding	45	GC12P098515	10.1875	https://www.genecards.org/cgi-bin/carddisp.pl?gene=TMPO
MIR95	MicroRNA 95	RNA Gene	16	GC04M008007	10.167	https://www.genecards.org/cgi-bin/carddisp.pl?gene=MIR95
GLP1R	Glucagon Like Peptide 1 Receptor	Protein Coding	47	GC06P039048	10.1655	https://www.genecards.org/cgi-bin/carddisp.pl?gene=GLP1R
ALDH9A1	Aldehyde Dehydrogenase 9 Family Member A1	Protein Coding	41	GC01M165671	10.0622	https://www.genecards.org/cgi-bin/carddisp.pl?gene=ALDH9A1
CACNA2D1	Calcium Voltage-Gated Channel Auxiliary Subunit Alpha2delta 1	Protein Coding	47	GC07M081946	10.0424	https://www.genecards.org/cgi-bin/carddisp.pl?gene=CACNA2D1
FOXP2	Forkhead Box P2	Protein Coding	44	GC07P114086	10.0274	https://www.genecards.org/cgi-bin/carddisp.pl?gene=FOXP2
PDGFA	Platelet Derived Growth Factor Subunit A	Protein Coding	43	GC07M000497	10.0159	https://www.genecards.org/cgi-bin/carddisp.pl?gene=PDGFA
FOXA1	Forkhead Box A1	Protein Coding	43	GC14M037589	9.97132	https://www.genecards.org/cgi-bin/carddisp.pl?gene=FOXA1
MIR103A1	MicroRNA 103a-1	RNA Gene	18	GC05M168560	9.92382	https://www.genecards.org/cgi-bin/carddisp.pl?gene=MIR103A1
YWHAE	Tyrosine 3-Monooxygenase/Tryptophan 5-Monooxygenase Activation Protein Epsilon	Protein Coding	49	GC17M001346	9.9117	https://www.genecards.org/cgi-bin/carddisp.pl?gene=YWHAE
RPS15	Ribosomal Protein S15	Protein Coding	41	GC19P001438	9.87539	https://www.genecards.org/cgi-bin/carddisp.pl?gene=RPS15
EFTUD2	Elongation Factor Tu GTP Binding Domain Containing 2	Protein Coding	43	GC17M044852	9.84818	https://www.genecards.org/cgi-bin/carddisp.pl?gene=EFTUD2
YWHAQ	Tyrosine 3-Monooxygenase/Tryptophan 5-Monooxygenase Activation Protein Theta	Protein Coding	47	GC02M009583	9.82987	https://www.genecards.org/cgi-bin/carddisp.pl?gene=YWHAQ
GPI	Glucose-6-Phosphate Isomerase	Protein Coding	46	GC19P034359	9.82123	https://www.genecards.org/cgi-bin/carddisp.pl?gene=GPI
AOC3	Amine Oxidase Copper Containing 3	Protein Coding	44	GC17P042851	9.80303	https://www.genecards.org/cgi-bin/carddisp.pl?gene=AOC3
ITPR2	Inositol 1,4,5-Trisphosphate Receptor Type 2	Protein Coding	46	GC12M026336	9.79653	https://www.genecards.org/cgi-bin/carddisp.pl?gene=ITPR2
SLCO1A2	Solute Carrier Organic Anion Transporter Family Member 1A2	Protein Coding	39	GC12M021264	9.78969	https://www.genecards.org/cgi-bin/carddisp.pl?gene=SLCO1A2
SLC9A9	Solute Carrier Family 9 Member A9	Protein Coding	39	GC03M143265	9.76415	https://www.genecards.org/cgi-bin/carddisp.pl?gene=SLC9A9
GPD2	Glycerol-3-Phosphate Dehydrogenase 2	Protein Coding	46	GC02P156435	9.75695	https://www.genecards.org/cgi-bin/carddisp.pl?gene=GPD2
SLC39A14	Solute Carrier Family 39 Member 14	Protein Coding	43	GC08P022367	9.70437	https://www.genecards.org/cgi-bin/carddisp.pl?gene=SLC39A14
MIR187	MicroRNA 187	RNA Gene	18	GC18M035904	9.70011	https://www.genecards.org/cgi-bin/carddisp.pl?gene=MIR187
ABO	ABO, Alpha 1-3-N-Acetylgalactosaminyltransferase And Alpha 1-3-Galactosyltransferase	Protein Coding	36	GC09M133250	9.69478	https://www.genecards.org/cgi-bin/carddisp.pl?gene=ABO
MYH10	Myosin Heavy Chain 10	Protein Coding	47	GC17M008474	9.66185	https://www.genecards.org/cgi-bin/carddisp.pl?gene=MYH10
CEACAM1	CEA Cell Adhesion Molecule 1	Protein Coding	42	GC19M042507	9.65998	https://www.genecards.org/cgi-bin/carddisp.pl?gene=CEACAM1
RPL10	Ribosomal Protein L10	Protein Coding	45	GC0XP154389	9.64586	https://www.genecards.org/cgi-bin/carddisp.pl?gene=RPL10
EDA	Ectodysplasin A	Protein Coding	42	GC0XP069618	9.62731	https://www.genecards.org/cgi-bin/carddisp.pl?gene=EDA
ENPP2	Ectonucleotide Pyrophosphatase/Phosphodiesterase 2	Protein Coding	44	GC08M119556	9.62129	https://www.genecards.org/cgi-bin/carddisp.pl?gene=ENPP2
PIN1	Peptidylprolyl Cis/Trans Isomerase, NIMA-Interacting 1	Protein Coding	47	GC19P009835	9.61792	https://www.genecards.org/cgi-bin/carddisp.pl?gene=PIN1
CYP46A1	Cytochrome P450 Family 46 Subfamily A Member 1	Protein Coding	41	GC14P099684	9.58076	https://www.genecards.org/cgi-bin/carddisp.pl?gene=CYP46A1
GOT1	Glutamic-Oxaloacetic Transaminase 1	Protein Coding	46	GC10M099396	9.58041	https://www.genecards.org/cgi-bin/carddisp.pl?gene=GOT1
ITPA	Inosine Triphosphatase	Protein Coding	45	GC20P003365	9.57803	https://www.genecards.org/cgi-bin/carddisp.pl?gene=ITPA
MIR423	MicroRNA 423	RNA Gene	18	GC17P030117	9.56785	https://www.genecards.org/cgi-bin/carddisp.pl?gene=MIR423
NT5E	5'-Nucleotidase Ecto	Protein Coding	51	GC06P085449	9.56404	https://www.genecards.org/cgi-bin/carddisp.pl?gene=NT5E
PLIN5	Perilipin 5	Protein Coding	33	GC19M004522	9.56174	https://www.genecards.org/cgi-bin/carddisp.pl?gene=PLIN5
CPB2	Carboxypeptidase B2	Protein Coding	44	GC13M046053	9.53569	https://www.genecards.org/cgi-bin/carddisp.pl?gene=CPB2
PRKDC	Protein Kinase, DNA-Activated, Catalytic Subunit	Protein Coding	50	GC08M047773	9.49728	https://www.genecards.org/cgi-bin/carddisp.pl?gene=PRKDC
SLC1A3	Solute Carrier Family 1 Member 3	Protein Coding	51	GC05P036623	9.48655	https://www.genecards.org/cgi-bin/carddisp.pl?gene=SLC1A3
HYPLIP2	Hyperlipidemia, Combined, 2	Genetic Locus	1	GC11U990241	9.48171	https://www.genecards.org/cgi-bin/carddisp.pl?gene=HYPLIP2
AGRP	Agouti Related Neuropeptide	Protein Coding	43	GC16M067482	9.47029	https://www.genecards.org/cgi-bin/carddisp.pl?gene=AGRP
COL13A1	Collagen Type XIII Alpha 1 Chain	Protein Coding	40	GC10P069801	9.34336	https://www.genecards.org/cgi-bin/carddisp.pl?gene=COL13A1
LCT	Lactase	Protein Coding	43	GC02M135787	9.32285	https://www.genecards.org/cgi-bin/carddisp.pl?gene=LCT
HRH2	Histamine Receptor H2	Protein Coding	44	GC05P175659	9.31773	https://www.genecards.org/cgi-bin/carddisp.pl?gene=HRH2
RGN	Regucalcin	Protein Coding	38	GC0XP047212	9.30262	https://www.genecards.org/cgi-bin/carddisp.pl?gene=RGN
TNFRSF4	TNF Receptor Superfamily Member 4	Protein Coding	42	GC01M001211	9.29873	https://www.genecards.org/cgi-bin/carddisp.pl?gene=TNFRSF4
XRCC5	X-Ray Repair Cross Complementing 5	Protein Coding	44	GC02P216107	9.27322	https://www.genecards.org/cgi-bin/carddisp.pl?gene=XRCC5
RPS17	Ribosomal Protein S17	Protein Coding	43	GC15M082536	9.253	https://www.genecards.org/cgi-bin/carddisp.pl?gene=RPS17
IMMT	Inner Membrane Mitochondrial Protein	Protein Coding	40	GC02M086144	9.2228	https://www.genecards.org/cgi-bin/carddisp.pl?gene=IMMT
TNC	Tenascin C	Protein Coding	49	GC09M115019	9.21582	https://www.genecards.org/cgi-bin/carddisp.pl?gene=TNC
AKR1B10	Aldo-Keto Reductase Family 1 Member B10	Protein Coding	43	GC07P134527	9.20336	https://www.genecards.org/cgi-bin/carddisp.pl?gene=AKR1B10
CCAT1	Colon Cancer Associated Transcript 1	RNA Gene	15	GC08M127207	9.20267	https://www.genecards.org/cgi-bin/carddisp.pl?gene=CCAT1
HTR1A	5-Hydroxytryptamine Receptor 1A	Protein Coding	47	GC05M063960	9.08408	https://www.genecards.org/cgi-bin/carddisp.pl?gene=HTR1A
EEF1A1	Eukaryotic Translation Elongation Factor 1 Alpha 1	Protein Coding	43	GC06M073515	9.07906	https://www.genecards.org/cgi-bin/carddisp.pl?gene=EEF1A1
PRKAG1	Protein Kinase AMP-Activated Non-Catalytic Subunit Gamma 1	Protein Coding	48	GC12M049002	8.98983	https://www.genecards.org/cgi-bin/carddisp.pl?gene=PRKAG1
NCOA1	Nuclear Receptor Coactivator 1	Protein Coding	44	GC02P024492	8.94206	https://www.genecards.org/cgi-bin/carddisp.pl?gene=NCOA1
PRDX5	Peroxiredoxin 5	Protein Coding	45	GC11P064317	8.90593	https://www.genecards.org/cgi-bin/carddisp.pl?gene=PRDX5
CRABP2	Cellular Retinoic Acid Binding Protein 2	Protein Coding	43	GC01M156701	8.87645	https://www.genecards.org/cgi-bin/carddisp.pl?gene=CRABP2
SALL4	Spalt Like Transcription Factor 4	Protein Coding	44	GC20M051784	8.82463	https://www.genecards.org/cgi-bin/carddisp.pl?gene=SALL4
VMA21	Vacuolar ATPase Assembly Factor VMA21	Protein Coding	36	GC0XP151396	8.758	https://www.genecards.org/cgi-bin/carddisp.pl?gene=VMA21
CISD2	CDGSH Iron Sulfur Domain 2	Protein Coding	41	GC04P102868	8.71761	https://www.genecards.org/cgi-bin/carddisp.pl?gene=CISD2
PPIB	Peptidylprolyl Isomerase B	Protein Coding	49	GC15M064155	8.68818	https://www.genecards.org/cgi-bin/carddisp.pl?gene=PPIB
THRSP	Thyroid Hormone Responsive	Protein Coding	37	GC11P078063	8.67967	https://www.genecards.org/cgi-bin/carddisp.pl?gene=THRSP
EIF3F	Eukaryotic Translation Initiation Factor 3 Subunit F	Protein Coding	43	GC11P007966	8.6749	https://www.genecards.org/cgi-bin/carddisp.pl?gene=EIF3F
TRIB1	Tribbles Pseudokinase 1	Protein Coding	38	GC08P125430	8.65633	https://www.genecards.org/cgi-bin/carddisp.pl?gene=TRIB1
ADH7	Alcohol Dehydrogenase 7 (Class IV), Mu Or Sigma Polypeptide	Protein Coding	44	GC04M099412	8.6198	https://www.genecards.org/cgi-bin/carddisp.pl?gene=ADH7
MYO6	Myosin VI	Protein Coding	46	GC06P075749	8.57962	https://www.genecards.org/cgi-bin/carddisp.pl?gene=MYO6
CCL21	C-C Motif Chemokine Ligand 21	Protein Coding	42	GC09M034709	8.57898	https://www.genecards.org/cgi-bin/carddisp.pl?gene=CCL21
TP53BP1	Tumor Protein P53 Binding Protein 1	Protein Coding	45	GC15M043403	8.55745	https://www.genecards.org/cgi-bin/carddisp.pl?gene=TP53BP1
AHNAK	AHNAK Nucleoprotein	Protein Coding	37	GC11M071488	8.54688	https://www.genecards.org/cgi-bin/carddisp.pl?gene=AHNAK
DMGDH	Dimethylglycine Dehydrogenase	Protein Coding	43	GC05M078997	8.53333	https://www.genecards.org/cgi-bin/carddisp.pl?gene=DMGDH
AMFR	Autocrine Motility Factor Receptor	Protein Coding	43	GC16M056361	8.49186	https://www.genecards.org/cgi-bin/carddisp.pl?gene=AMFR
OPRM1	Opioid Receptor Mu 1	Protein Coding	48	GC06P154075	8.45881	https://www.genecards.org/cgi-bin/carddisp.pl?gene=OPRM1
PZP	PZP Alpha-2-Macroglobulin Like	Protein Coding	40	GC12M009148	8.36906	https://www.genecards.org/cgi-bin/carddisp.pl?gene=PZP
FGL2	Fibrinogen Like 2	Protein Coding	40	GC07M077193	8.34866	https://www.genecards.org/cgi-bin/carddisp.pl?gene=FGL2
CCT5	Chaperonin Containing TCP1 Subunit 5	Protein Coding	44	GC05P010236	8.3274	https://www.genecards.org/cgi-bin/carddisp.pl?gene=CCT5
RPL27	Ribosomal Protein L27	Protein Coding	43	GC17P042998	8.31937	https://www.genecards.org/cgi-bin/carddisp.pl?gene=RPL27
GPLD1	Glycosylphosphatidylinositol Specific Phospholipase D1	Protein Coding	42	GC06M024443	8.27011	https://www.genecards.org/cgi-bin/carddisp.pl?gene=GPLD1
HSPA6	Heat Shock Protein Family A (Hsp70) Member 6	Protein Coding	44	GC01P161524	8.24648	https://www.genecards.org/cgi-bin/carddisp.pl?gene=HSPA6
ATAD3A	ATPase Family AAA Domain Containing 3A	Protein Coding	39	GC01P002254	8.23898	https://www.genecards.org/cgi-bin/carddisp.pl?gene=ATAD3A
SERPINA12	Serpin Family A Member 12	Protein Coding	38	GC14M096476	8.22459	https://www.genecards.org/cgi-bin/carddisp.pl?gene=SERPINA12
LGALS3BP	Galectin 3 Binding Protein	Protein Coding	41	GC17M078971	8.19357	https://www.genecards.org/cgi-bin/carddisp.pl?gene=LGALS3BP
CPN1	Carboxypeptidase N Subunit 1	Protein Coding	44	GC10M100042	8.13778	https://www.genecards.org/cgi-bin/carddisp.pl?gene=CPN1
ACVR2B	Activin A Receptor Type 2B	Protein Coding	50	GC03P038453	8.13065	https://www.genecards.org/cgi-bin/carddisp.pl?gene=ACVR2B
MACROD2	Mono-ADP Ribosylhydrolase 2	Protein Coding	36	GC20P013925	8.12774	https://www.genecards.org/cgi-bin/carddisp.pl?gene=MACROD2
MOGAT2	Monoacylglycerol O-Acyltransferase 2	Protein Coding	38	GC11P075717	8.11907	https://www.genecards.org/cgi-bin/carddisp.pl?gene=MOGAT2
PARVB	Parvin Beta	Protein Coding	40	GC22P043999	8.1162	https://www.genecards.org/cgi-bin/carddisp.pl?gene=PARVB
REG1A	Regenerating Family Member 1 Alpha	Protein Coding	40	GC02P079120	8.10439	https://www.genecards.org/cgi-bin/carddisp.pl?gene=REG1A
STEAP4	STEAP4 Metalloreductase	Protein Coding	40	GC07M088324	8.06342	https://www.genecards.org/cgi-bin/carddisp.pl?gene=STEAP4
TLL1	Tolloid Like 1	Protein Coding	43	GC04P165873	8.04391	https://www.genecards.org/cgi-bin/carddisp.pl?gene=TLL1
FST	Follistatin	Protein Coding	46	GC05P053480	8.01452	https://www.genecards.org/cgi-bin/carddisp.pl?gene=FST
PSMC2	Proteasome 26S Subunit, ATPase 2	Protein Coding	41	GC07P103344	8.00727	https://www.genecards.org/cgi-bin/carddisp.pl?gene=PSMC2
HYOU1	Hypoxia Up-Regulated 1	Protein Coding	44	GC11M119047	7.91249	https://www.genecards.org/cgi-bin/carddisp.pl?gene=HYOU1
SIRT6	Sirtuin 6	Protein Coding	45	GC19M004174	7.90074	https://www.genecards.org/cgi-bin/carddisp.pl?gene=SIRT6
IGHG1	Immunoglobulin Heavy Constant Gamma 1 (G1m Marker)	Protein Coding	33	GC14M105736	7.89499	https://www.genecards.org/cgi-bin/carddisp.pl?gene=IGHG1
RPL7	Ribosomal Protein L7	Protein Coding	42	GC08M073290	7.87272	https://www.genecards.org/cgi-bin/carddisp.pl?gene=RPL7
USP7	Ubiquitin Specific Peptidase 7	Protein Coding	48	GC16M008892	7.85098	https://www.genecards.org/cgi-bin/carddisp.pl?gene=USP7
UGDH	UDP-Glucose 6-Dehydrogenase	Protein Coding	46	GC04M039502	7.85024	https://www.genecards.org/cgi-bin/carddisp.pl?gene=UGDH
AUP1	AUP1 Lipid Droplet Regulating VLDL Assembly Factor	Protein Coding	37	GC02M074526	7.84738	https://www.genecards.org/cgi-bin/carddisp.pl?gene=AUP1
PUF60	Poly(U) Binding Splicing Factor 60	Protein Coding	42	GC08M143816	7.84367	https://www.genecards.org/cgi-bin/carddisp.pl?gene=PUF60
RPS15A	Ribosomal Protein S15a	Protein Coding	43	GC16M018781	7.83663	https://www.genecards.org/cgi-bin/carddisp.pl?gene=RPS15A
H4-16	H4 Histone 16	Protein Coding	33	GC12M016380	7.82571	https://www.genecards.org/cgi-bin/carddisp.pl?gene=H4-16
PEG10	Paternally Expressed 10	Protein Coding	40	GC07P094656	7.8112	https://www.genecards.org/cgi-bin/carddisp.pl?gene=PEG10
MYO1B	Myosin IB	Protein Coding	38	GC02P191246	7.70741	https://www.genecards.org/cgi-bin/carddisp.pl?gene=MYO1B
CAD	Carbamoyl-Phosphate Synthetase 2, Aspartate Transcarbamylase, And Dihydroorotase	Protein Coding	50	GC02P027217	7.66644	https://www.genecards.org/cgi-bin/carddisp.pl?gene=CAD
ATP5F1B	ATP Synthase F1 Subunit Beta	Protein Coding	34	GC12M056639	7.63761	https://www.genecards.org/cgi-bin/carddisp.pl?gene=ATP5F1B
SLC25A37	Solute Carrier Family 25 Member 37	Protein Coding	38	GC08P023528	7.62079	https://www.genecards.org/cgi-bin/carddisp.pl?gene=SLC25A37
PSMD2	Proteasome 26S Subunit Ubiquitin Receptor, Non-ATPase 2	Protein Coding	44	GC03P184298	7.59634	https://www.genecards.org/cgi-bin/carddisp.pl?gene=PSMD2
UBE2D2	Ubiquitin Conjugating Enzyme E2 D2	Protein Coding	44	GC05P139526	7.55288	https://www.genecards.org/cgi-bin/carddisp.pl?gene=UBE2D2
GPT2	Glutamic--Pyruvic Transaminase 2	Protein Coding	47	GC16P046885	7.54618	https://www.genecards.org/cgi-bin/carddisp.pl?gene=GPT2
VAMP2	Vesicle Associated Membrane Protein 2	Protein Coding	44	GC17M009340	7.54385	https://www.genecards.org/cgi-bin/carddisp.pl?gene=VAMP2
SAMM50	SAMM50 Sorting And Assembly Machinery Component	Protein Coding	37	GC22P043955	7.53753	https://www.genecards.org/cgi-bin/carddisp.pl?gene=SAMM50
PRSS2	Serine Protease 2	Protein Coding	40	GC07P146094	7.45558	https://www.genecards.org/cgi-bin/carddisp.pl?gene=PRSS2
ULK1	Unc-51 Like Autophagy Activating Kinase 1	Protein Coding	45	GC12P131894	7.38953	https://www.genecards.org/cgi-bin/carddisp.pl?gene=ULK1
NCAN	Neurocan	Protein Coding	41	GC19P027838	7.38778	https://www.genecards.org/cgi-bin/carddisp.pl?gene=NCAN
AQP3	Aquaporin 3 (Gill Blood Group)	Protein Coding	47	GC09M033431	7.36927	https://www.genecards.org/cgi-bin/carddisp.pl?gene=AQP3
NR4A1	Nuclear Receptor Subfamily 4 Group A Member 1	Protein Coding	47	GC12P052022	7.36453	https://www.genecards.org/cgi-bin/carddisp.pl?gene=NR4A1
DCLK1	Doublecortin Like Kinase 1	Protein Coding	44	GC13M035768	7.35176	https://www.genecards.org/cgi-bin/carddisp.pl?gene=DCLK1
HNRNPC	Heterogeneous Nuclear Ribonucleoprotein C	Protein Coding	41	GC14M021210	7.34396	https://www.genecards.org/cgi-bin/carddisp.pl?gene=HNRNPC
IFNL4	Interferon Lambda 4 (Gene/Pseudogene)	Protein Coding	18	GC19M039246	7.28595	https://www.genecards.org/cgi-bin/carddisp.pl?gene=IFNL4
RPS23	Ribosomal Protein S23	Protein Coding	41	GC05M082273	7.25244	https://www.genecards.org/cgi-bin/carddisp.pl?gene=RPS23
PTBP1	Polypyrimidine Tract Binding Protein 1	Protein Coding	43	GC19P000797	7.2411	https://www.genecards.org/cgi-bin/carddisp.pl?gene=PTBP1
UFM1	Ubiquitin Fold Modifier 1	Protein Coding	40	GC13P038349	7.23936	https://www.genecards.org/cgi-bin/carddisp.pl?gene=UFM1
CFD	Complement Factor D	Protein Coding	44	GC19P000859	7.20288	https://www.genecards.org/cgi-bin/carddisp.pl?gene=CFD
TXNIP	Thioredoxin Interacting Protein	Protein Coding	37	GC01M145992	7.16898	https://www.genecards.org/cgi-bin/carddisp.pl?gene=TXNIP
ONECUT2	One Cut Homeobox 2	Protein Coding	36	GC18P057436	7.13141	https://www.genecards.org/cgi-bin/carddisp.pl?gene=ONECUT2
SLC25A3	Solute Carrier Family 25 Member 3	Protein Coding	45	GC12P098593	7.12514	https://www.genecards.org/cgi-bin/carddisp.pl?gene=SLC25A3
MSBP1	Minisatellite Binding Protein 1	Protein Coding	5	GC00U990213	7.09752	https://www.genecards.org/cgi-bin/carddisp.pl?gene=MSBP1
SLC25A10	Solute Carrier Family 25 Member 10	Protein Coding	43	GC17P081712	7.03819	https://www.genecards.org/cgi-bin/carddisp.pl?gene=SLC25A10
DARS1	Aspartyl-TRNA Synthetase 1	Protein Coding	36	GC02M135905	7.00902	https://www.genecards.org/cgi-bin/carddisp.pl?gene=DARS1
PABPC1	Poly(A) Binding Protein Cytoplasmic 1	Protein Coding	43	GC08M100685	7.00349	https://www.genecards.org/cgi-bin/carddisp.pl?gene=PABPC1
H1-4	H1.4 Linker Histone, Cluster Member	Protein Coding	36	GC06P058729	6.98357	https://www.genecards.org/cgi-bin/carddisp.pl?gene=H1-4
TRIM8	Tripartite Motif Containing 8	Protein Coding	37	GC10P102643	6.9717	https://www.genecards.org/cgi-bin/carddisp.pl?gene=TRIM8
LOXL2	Lysyl Oxidase Like 2	Protein Coding	44	GC08M023296	6.94755	https://www.genecards.org/cgi-bin/carddisp.pl?gene=LOXL2
YBX1	Y-Box Binding Protein 1	Protein Coding	38	GC01P042682	6.93542	https://www.genecards.org/cgi-bin/carddisp.pl?gene=YBX1
SRSF1	Serine And Arginine Rich Splicing Factor 1	Protein Coding	41	GC17M058000	6.91861	https://www.genecards.org/cgi-bin/carddisp.pl?gene=SRSF1
LOC110806262	Solute Carrier Family 6 Member 4 Gene Promoter	Biological Region	1	GC17P030235	6.91328	https://www.genecards.org/cgi-bin/carddisp.pl?gene=LOC110806262
MCM7	Minichromosome Maintenance Complex Component 7	Protein Coding	45	GC07M100092	6.88603	https://www.genecards.org/cgi-bin/carddisp.pl?gene=MCM7
PREP	Prolyl Endopeptidase	Protein Coding	42	GC06M105277	6.87295	https://www.genecards.org/cgi-bin/carddisp.pl?gene=PREP
H4C1	H4 Clustered Histone 1	Protein Coding	32	GC06P058076	6.86513	https://www.genecards.org/cgi-bin/carddisp.pl?gene=H4C1
SIRT4	Sirtuin 4	Protein Coding	40	GC12P120291	6.81203	https://www.genecards.org/cgi-bin/carddisp.pl?gene=SIRT4
ATXN2L	Ataxin 2 Like	Protein Coding	38	GC16P033255	6.78986	https://www.genecards.org/cgi-bin/carddisp.pl?gene=ATXN2L
PDE3B	Phosphodiesterase 3B	Protein Coding	44	GC11P014643	6.779	https://www.genecards.org/cgi-bin/carddisp.pl?gene=PDE3B
CXCL16	C-X-C Motif Chemokine Ligand 16	Protein Coding	39	GC17M004733	6.7373	https://www.genecards.org/cgi-bin/carddisp.pl?gene=CXCL16
AQP9	Aquaporin 9	Protein Coding	44	GC15P058138	6.72995	https://www.genecards.org/cgi-bin/carddisp.pl?gene=AQP9
LUM	Lumican	Protein Coding	41	GC12M091102	6.72301	https://www.genecards.org/cgi-bin/carddisp.pl?gene=LUM
TPM4	Tropomyosin 4	Protein Coding	40	GC19P027745	6.64521	https://www.genecards.org/cgi-bin/carddisp.pl?gene=TPM4
MIR103A2	MicroRNA 103a-2	RNA Gene	19	GC20P003917	6.64079	https://www.genecards.org/cgi-bin/carddisp.pl?gene=MIR103A2
MAP3K8	Mitogen-Activated Protein Kinase Kinase Kinase 8	Protein Coding	47	GC10P030458	6.5854	https://www.genecards.org/cgi-bin/carddisp.pl?gene=MAP3K8
MIR33B	MicroRNA 33b	RNA Gene	18	GC17M017813	6.56772	https://www.genecards.org/cgi-bin/carddisp.pl?gene=MIR33B
INSIG1	Insulin Induced Gene 1	Protein Coding	40	GC07P155297	6.54558	https://www.genecards.org/cgi-bin/carddisp.pl?gene=INSIG1
BIRC2	Baculoviral IAP Repeat Containing 2	Protein Coding	45	GC11P102347	6.53988	https://www.genecards.org/cgi-bin/carddisp.pl?gene=BIRC2
ANXA6	Annexin A6	Protein Coding	42	GC05M151100	6.52552	https://www.genecards.org/cgi-bin/carddisp.pl?gene=ANXA6
CALD1	Caldesmon 1	Protein Coding	43	GC07P134744	6.51988	https://www.genecards.org/cgi-bin/carddisp.pl?gene=CALD1
RPL13	Ribosomal Protein L13	Protein Coding	42	GC16P089893	6.50981	https://www.genecards.org/cgi-bin/carddisp.pl?gene=RPL13
RPLP2	Ribosomal Protein Lateral Stalk Subunit P2	Protein Coding	41	GC11P001087	6.5081	https://www.genecards.org/cgi-bin/carddisp.pl?gene=RPLP2
RPN1	Ribophorin I	Protein Coding	43	GC03M128619	6.50627	https://www.genecards.org/cgi-bin/carddisp.pl?gene=RPN1
HSD17B1	Hydroxysteroid 17-Beta Dehydrogenase 1	Protein Coding	43	GC17P042548	6.49926	https://www.genecards.org/cgi-bin/carddisp.pl?gene=HSD17B1
PPP1R15A	Protein Phosphatase 1 Regulatory Subunit 15A	Protein Coding	40	GC19P048872	6.47678	https://www.genecards.org/cgi-bin/carddisp.pl?gene=PPP1R15A
H4C13	H4 Clustered Histone 13	Protein Coding	27	GC06M049505	6.47665	https://www.genecards.org/cgi-bin/carddisp.pl?gene=H4C13
TET1	Tet Methylcytosine Dioxygenase 1	Protein Coding	38	GC10P068560	6.45807	https://www.genecards.org/cgi-bin/carddisp.pl?gene=TET1
RPL7A	Ribosomal Protein L7a	Protein Coding	42	GC09P133348	6.44219	https://www.genecards.org/cgi-bin/carddisp.pl?gene=RPL7A
RPL6	Ribosomal Protein L6	Protein Coding	40	GC12M112320	6.42764	https://www.genecards.org/cgi-bin/carddisp.pl?gene=RPL6
H4C11	H4 Clustered Histone 11	Protein Coding	29	GC06P058139	6.41778	https://www.genecards.org/cgi-bin/carddisp.pl?gene=H4C11
SRSF6	Serine And Arginine Rich Splicing Factor 6	Protein Coding	39	GC20P043457	6.41171	https://www.genecards.org/cgi-bin/carddisp.pl?gene=SRSF6
H4C8	H4 Clustered Histone 8	Protein Coding	29	GC06M049509	6.41134	https://www.genecards.org/cgi-bin/carddisp.pl?gene=H4C8
H4C4	H4 Clustered Histone 4	Protein Coding	26	GC06M049507	6.39373	https://www.genecards.org/cgi-bin/carddisp.pl?gene=H4C4
SNHG20	Small Nucleolar RNA Host Gene 20	RNA Gene	18	GC17P077087	6.38989	https://www.genecards.org/cgi-bin/carddisp.pl?gene=SNHG20
INSIG2	Insulin Induced Gene 2	Protein Coding	40	GC02P118088	6.38823	https://www.genecards.org/cgi-bin/carddisp.pl?gene=INSIG2
HNRNPH1	Heterogeneous Nuclear Ribonucleoprotein H1	Protein Coding	39	GC05M179614	6.36652	https://www.genecards.org/cgi-bin/carddisp.pl?gene=HNRNPH1
YBX3	Y-Box Binding Protein 3	Protein Coding	39	GC12M016322	6.3607	https://www.genecards.org/cgi-bin/carddisp.pl?gene=YBX3
SLC3A2	Solute Carrier Family 3 Member 2	Protein Coding	41	GC11P062856	6.35752	https://www.genecards.org/cgi-bin/carddisp.pl?gene=SLC3A2
PDIA3	Protein Disulfide Isomerase Family A Member 3	Protein Coding	45	GC15P043746	6.35384	https://www.genecards.org/cgi-bin/carddisp.pl?gene=PDIA3
FAF2	Fas Associated Factor Family Member 2	Protein Coding	38	GC05P176447	6.35017	https://www.genecards.org/cgi-bin/carddisp.pl?gene=FAF2
RPS11	Ribosomal Protein S11	Protein Coding	40	GC19P049496	6.34121	https://www.genecards.org/cgi-bin/carddisp.pl?gene=RPS11
RGS5	Regulator Of G Protein Signaling 5	Protein Coding	40	GC01M163111	6.33474	https://www.genecards.org/cgi-bin/carddisp.pl?gene=RGS5
SLC38A8	Solute Carrier Family 38 Member 8	Protein Coding	37	GC16M084009	6.33445	https://www.genecards.org/cgi-bin/carddisp.pl?gene=SLC38A8
RPS18	Ribosomal Protein S18	Protein Coding	40	GC06P058369	6.33083	https://www.genecards.org/cgi-bin/carddisp.pl?gene=RPS18
EHBP1L1	EH Domain Binding Protein 1 Like 1	Protein Coding	32	GC11P066825	6.27832	https://www.genecards.org/cgi-bin/carddisp.pl?gene=EHBP1L1
RPTOR	Regulatory Associated Protein Of MTOR Complex 1	Protein Coding	44	GC17P080544	6.27573	https://www.genecards.org/cgi-bin/carddisp.pl?gene=RPTOR
ALDH1B1	Aldehyde Dehydrogenase 1 Family Member B1	Protein Coding	45	GC09P038392	6.254	https://www.genecards.org/cgi-bin/carddisp.pl?gene=ALDH1B1
H4C9	H4 Clustered Histone 9	Protein Coding	29	GC06P058745	6.23623	https://www.genecards.org/cgi-bin/carddisp.pl?gene=H4C9
AP2B1	Adaptor Related Protein Complex 2 Subunit Beta 1	Protein Coding	43	GC17P035578	6.22818	https://www.genecards.org/cgi-bin/carddisp.pl?gene=AP2B1
ROCK1	Rho Associated Coiled-Coil Containing Protein Kinase 1	Protein Coding	50	GC18M020946	6.22805	https://www.genecards.org/cgi-bin/carddisp.pl?gene=ROCK1
MCM3	Minichromosome Maintenance Complex Component 3	Protein Coding	45	GC06M052264	6.21253	https://www.genecards.org/cgi-bin/carddisp.pl?gene=MCM3
ABHD6	Abhydrolase Domain Containing 6, Acylglycerol Lipase	Protein Coding	38	GC03P058238	6.20513	https://www.genecards.org/cgi-bin/carddisp.pl?gene=ABHD6
PDPK1	3-Phosphoinositide Dependent Protein Kinase 1	Protein Coding	49	GC16P002537	6.2003	https://www.genecards.org/cgi-bin/carddisp.pl?gene=PDPK1
TOMM20	Translocase Of Outer Mitochondrial Membrane 20	Protein Coding	39	GC01M235109	6.1986	https://www.genecards.org/cgi-bin/carddisp.pl?gene=TOMM20
LCP1	Lymphocyte Cytosolic Protein 1	Protein Coding	42	GC13M046132	6.19353	https://www.genecards.org/cgi-bin/carddisp.pl?gene=LCP1
FARP1	FERM, ARH/RhoGEF And Pleckstrin Domain Protein 1	Protein Coding	38	GC13P098142	6.18793	https://www.genecards.org/cgi-bin/carddisp.pl?gene=FARP1
PRKCE	Protein Kinase C Epsilon	Protein Coding	49	GC02P045651	6.18488	https://www.genecards.org/cgi-bin/carddisp.pl?gene=PRKCE
H4C3	H4 Clustered Histone 3	Protein Coding	29	GC06P058081	6.18343	https://www.genecards.org/cgi-bin/carddisp.pl?gene=H4C3
FETUB	Fetuin B	Protein Coding	36	GC03P186635	6.17114	https://www.genecards.org/cgi-bin/carddisp.pl?gene=FETUB
H4C2	H4 Clustered Histone 2	Protein Coding	30	GC06M026026	6.14388	https://www.genecards.org/cgi-bin/carddisp.pl?gene=H4C2
H4C6	H4 Clustered Histone 6	Protein Coding	28	GC06P058744	6.13993	https://www.genecards.org/cgi-bin/carddisp.pl?gene=H4C6
H4C14	H4 Clustered Histone 14	Protein Coding	28	GC01P149832	6.13263	https://www.genecards.org/cgi-bin/carddisp.pl?gene=H4C14
H4C15	H4 Clustered Histone 15	Protein Coding	26	GC01M150206	6.13263	https://www.genecards.org/cgi-bin/carddisp.pl?gene=H4C15
H4C12	H4 Clustered Histone 12	Protein Coding	29	GC06M049504	6.12945	https://www.genecards.org/cgi-bin/carddisp.pl?gene=H4C12
H4C5	H4 Clustered Histone 5	Protein Coding	27	GC06P058743	6.11611	https://www.genecards.org/cgi-bin/carddisp.pl?gene=H4C5
ADAMTS9	ADAM Metallopeptidase With Thrombospondin Type 1 Motif 9	Protein Coding	37	GC03M064501	6.11203	https://www.genecards.org/cgi-bin/carddisp.pl?gene=ADAMTS9
MAP3K11	Mitogen-Activated Protein Kinase Kinase Kinase 11	Protein Coding	48	GC11M071696	6.08462	https://www.genecards.org/cgi-bin/carddisp.pl?gene=MAP3K11
IL13RA2	Interleukin 13 Receptor Subunit Alpha 2	Protein Coding	40	GC0XM115003	6.05872	https://www.genecards.org/cgi-bin/carddisp.pl?gene=IL13RA2
RPL10A	Ribosomal Protein L10a	Protein Coding	43	GC06P058439	6.02354	https://www.genecards.org/cgi-bin/carddisp.pl?gene=RPL10A
ST8SIA1	ST8 Alpha-N-Acetyl-Neuraminide Alpha-2,8-Sialyltransferase 1	Protein Coding	41	GC12M022063	6.01791	https://www.genecards.org/cgi-bin/carddisp.pl?gene=ST8SIA1
CAMKK2	Calcium/Calmodulin Dependent Protein Kinase Kinase 2	Protein Coding	47	GC12M121608	6.01277	https://www.genecards.org/cgi-bin/carddisp.pl?gene=CAMKK2
USF2	Upstream Transcription Factor 2, C-Fos Interacting	Protein Coding	40	GC19P035268	5.96952	https://www.genecards.org/cgi-bin/carddisp.pl?gene=USF2
RPL3	Ribosomal Protein L3	Protein Coding	41	GC22M049702	5.92426	https://www.genecards.org/cgi-bin/carddisp.pl?gene=RPL3
RPL12	Ribosomal Protein L12	Protein Coding	41	GC09M127447	5.92203	https://www.genecards.org/cgi-bin/carddisp.pl?gene=RPL12
INHBA	Inhibin Subunit Beta A	Protein Coding	44	GC07M041668	5.91465	https://www.genecards.org/cgi-bin/carddisp.pl?gene=INHBA
TPT1	Tumor Protein, Translationally-Controlled 1	Protein Coding	45	GC13M045333	5.90575	https://www.genecards.org/cgi-bin/carddisp.pl?gene=TPT1
HNRNPM	Heterogeneous Nuclear Ribonucleoprotein M	Protein Coding	40	GC19P008444	5.84503	https://www.genecards.org/cgi-bin/carddisp.pl?gene=HNRNPM
YWHAZ	Tyrosine 3-Monooxygenase/Tryptophan 5-Monooxygenase Activation Protein Zeta	Protein Coding	47	GC08M100917	5.83843	https://www.genecards.org/cgi-bin/carddisp.pl?gene=YWHAZ
HSP90AB1	Heat Shock Protein 90 Alpha Family Class B Member 1	Protein Coding	45	GC06P044246	5.8355	https://www.genecards.org/cgi-bin/carddisp.pl?gene=HSP90AB1
HNRNPF	Heterogeneous Nuclear Ribonucleoprotein F	Protein Coding	40	GC10M043385	5.82042	https://www.genecards.org/cgi-bin/carddisp.pl?gene=HNRNPF
PCBP2	Poly(RC) Binding Protein 2	Protein Coding	41	GC12P053452	5.8045	https://www.genecards.org/cgi-bin/carddisp.pl?gene=PCBP2
SLC46A3	Solute Carrier Family 46 Member 3	Protein Coding	36	GC13M028700	5.77806	https://www.genecards.org/cgi-bin/carddisp.pl?gene=SLC46A3
GCN1	GCN1 Activator Of EIF2AK4	Protein Coding	28	GC12M120128	5.76411	https://www.genecards.org/cgi-bin/carddisp.pl?gene=GCN1
PCBP1	Poly(RC) Binding Protein 1	Protein Coding	42	GC02P070087	5.76129	https://www.genecards.org/cgi-bin/carddisp.pl?gene=PCBP1
DNAJA1	DnaJ Heat Shock Protein Family (Hsp40) Member A1	Protein Coding	41	GC09P033025	5.75333	https://www.genecards.org/cgi-bin/carddisp.pl?gene=DNAJA1
AEBP1	AE Binding Protein 1	Protein Coding	40	GC07P044106	5.70542	https://www.genecards.org/cgi-bin/carddisp.pl?gene=AEBP1
CTSS	Cathepsin S	Protein Coding	45	GC01M150730	5.67502	https://www.genecards.org/cgi-bin/carddisp.pl?gene=CTSS
TMSB4X	Thymosin Beta 4 X-Linked	Protein Coding	40	GC0XP012975	5.66917	https://www.genecards.org/cgi-bin/carddisp.pl?gene=TMSB4X
CCL19	C-C Motif Chemokine Ligand 19	Protein Coding	40	GC09M034692	5.66266	https://www.genecards.org/cgi-bin/carddisp.pl?gene=CCL19
PPP1CA	Protein Phosphatase 1 Catalytic Subunit Alpha	Protein Coding	48	GC11M071828	5.66152	https://www.genecards.org/cgi-bin/carddisp.pl?gene=PPP1CA
HS3ST1	Heparan Sulfate-Glucosamine 3-Sulfotransferase 1	Protein Coding	41	GC04M011394	5.64289	https://www.genecards.org/cgi-bin/carddisp.pl?gene=HS3ST1
NCL	Nucleolin	Protein Coding	42	GC02M231453	5.63474	https://www.genecards.org/cgi-bin/carddisp.pl?gene=NCL
IGF2BP1	Insulin Like Growth Factor 2 MRNA Binding Protein 1	Protein Coding	40	GC17P048997	5.61969	https://www.genecards.org/cgi-bin/carddisp.pl?gene=IGF2BP1
RPS2	Ribosomal Protein S2	Protein Coding	43	GC16M003819	5.61659	https://www.genecards.org/cgi-bin/carddisp.pl?gene=RPS2
RPS9	Ribosomal Protein S9	Protein Coding	42	GC19P057598	5.61571	https://www.genecards.org/cgi-bin/carddisp.pl?gene=RPS9
SLC25A11	Solute Carrier Family 25 Member 11	Protein Coding	44	GC17M004937	5.59485	https://www.genecards.org/cgi-bin/carddisp.pl?gene=SLC25A11
HSPH1	Heat Shock Protein Family H (Hsp110) Member 1	Protein Coding	43	GC13M031134	5.59375	https://www.genecards.org/cgi-bin/carddisp.pl?gene=HSPH1
DDX1	DEAD-Box Helicase 1	Protein Coding	43	GC02P015591	5.57065	https://www.genecards.org/cgi-bin/carddisp.pl?gene=DDX1
CTPS1	CTP Synthase 1	Protein Coding	45	GC01P040979	5.56723	https://www.genecards.org/cgi-bin/carddisp.pl?gene=CTPS1
CCAR2	Cell Cycle And Apoptosis Regulator 2	Protein Coding	37	GC08P022604	5.53444	https://www.genecards.org/cgi-bin/carddisp.pl?gene=CCAR2
HTR1B	5-Hydroxytryptamine Receptor 1B	Protein Coding	45	GC06M077478	5.53239	https://www.genecards.org/cgi-bin/carddisp.pl?gene=HTR1B
SLC25A2	Solute Carrier Family 25 Member 2	Protein Coding	34	GC05M141302	5.5311	https://www.genecards.org/cgi-bin/carddisp.pl?gene=SLC25A2
TRIM33	Tripartite Motif Containing 33	Protein Coding	43	GC01M114392	5.53083	https://www.genecards.org/cgi-bin/carddisp.pl?gene=TRIM33
ZP4	Zona Pellucida Glycoprotein 4	Protein Coding	32	GC01M237877	5.52978	https://www.genecards.org/cgi-bin/carddisp.pl?gene=ZP4
MYO18A	Myosin XVIIIA	Protein Coding	38	GC17M031471	5.52829	https://www.genecards.org/cgi-bin/carddisp.pl?gene=MYO18A
PFKFB3	6-Phosphofructo-2-Kinase/Fructose-2,6-Biphosphatase 3	Protein Coding	45	GC10P006144	5.50629	https://www.genecards.org/cgi-bin/carddisp.pl?gene=PFKFB3
PTPRU	Protein Tyrosine Phosphatase Receptor Type U	Protein Coding	42	GC01P029236	5.49968	https://www.genecards.org/cgi-bin/carddisp.pl?gene=PTPRU
DHX9	DExH-Box Helicase 9	Protein Coding	40	GC01P182839	5.48886	https://www.genecards.org/cgi-bin/carddisp.pl?gene=DHX9
VIL1	Villin 1	Protein Coding	40	GC02P218419	5.47121	https://www.genecards.org/cgi-bin/carddisp.pl?gene=VIL1
HNRNPUL1	Heterogeneous Nuclear Ribonucleoprotein U Like 1	Protein Coding	38	GC19P041262	5.46703	https://www.genecards.org/cgi-bin/carddisp.pl?gene=HNRNPUL1
PDGFC	Platelet Derived Growth Factor C	Protein Coding	43	GC04M156760	5.44581	https://www.genecards.org/cgi-bin/carddisp.pl?gene=PDGFC
PSMD1	Proteasome 26S Subunit, Non-ATPase 1	Protein Coding	40	GC02P231056	5.43245	https://www.genecards.org/cgi-bin/carddisp.pl?gene=PSMD1
AHSA1	Activator Of HSP90 ATPase Activity 1	Protein Coding	38	GC14P077457	5.40718	https://www.genecards.org/cgi-bin/carddisp.pl?gene=AHSA1
DDX5	DEAD-Box Helicase 5	Protein Coding	47	GC17M064498	5.35967	https://www.genecards.org/cgi-bin/carddisp.pl?gene=DDX5
RPS4X	Ribosomal Protein S4 X-Linked	Protein Coding	39	GC0XM072255	5.32488	https://www.genecards.org/cgi-bin/carddisp.pl?gene=RPS4X
MAP1LC3B	Microtubule Associated Protein 1 Light Chain 3 Beta	Protein Coding	42	GC16P087384	5.32323	https://www.genecards.org/cgi-bin/carddisp.pl?gene=MAP1LC3B
RPL4	Ribosomal Protein L4	Protein Coding	42	GC15M066498	5.30013	https://www.genecards.org/cgi-bin/carddisp.pl?gene=RPL4
RPS3A	Ribosomal Protein S3A	Protein Coding	41	GC04P151099	5.28957	https://www.genecards.org/cgi-bin/carddisp.pl?gene=RPS3A
HNRNPL	Heterogeneous Nuclear Ribonucleoprotein L	Protein Coding	39	GC19M038836	5.28596	https://www.genecards.org/cgi-bin/carddisp.pl?gene=HNRNPL
CWF19L1	CWF19 Like Cell Cycle Control Factor 1	Protein Coding	38	GC10M100232	5.27894	https://www.genecards.org/cgi-bin/carddisp.pl?gene=CWF19L1
RPL9	Ribosomal Protein L9	Protein Coding	42	GC04M039452	5.24663	https://www.genecards.org/cgi-bin/carddisp.pl?gene=RPL9
RPL8	Ribosomal Protein L8	Protein Coding	41	GC08M144867	5.22888	https://www.genecards.org/cgi-bin/carddisp.pl?gene=RPL8
RXRG	Retinoid X Receptor Gamma	Protein Coding	42	GC01M165401	5.22321	https://www.genecards.org/cgi-bin/carddisp.pl?gene=RXRG
MCM5	Minichromosome Maintenance Complex Component 5	Protein Coding	45	GC22P035400	5.21936	https://www.genecards.org/cgi-bin/carddisp.pl?gene=MCM5
C1QTNF1	C1q And TNF Related 1	Protein Coding	38	GC17P079022	5.2147	https://www.genecards.org/cgi-bin/carddisp.pl?gene=C1QTNF1
SNRPD2	Small Nuclear Ribonucleoprotein D2 Polypeptide	Protein Coding	40	GC19M048749	5.21118	https://www.genecards.org/cgi-bin/carddisp.pl?gene=SNRPD2
HTR7	5-Hydroxytryptamine Receptor 7	Protein Coding	47	GC10M090740	5.20285	https://www.genecards.org/cgi-bin/carddisp.pl?gene=HTR7
STK24	Serine/Threonine Kinase 24	Protein Coding	44	GC13M098445	5.19416	https://www.genecards.org/cgi-bin/carddisp.pl?gene=STK24
RPL30	Ribosomal Protein L30	Protein Coding	40	GC08M098024	5.1837	https://www.genecards.org/cgi-bin/carddisp.pl?gene=RPL30
QARS1	Glutaminyl-TRNA Synthetase 1	Protein Coding	28	GC03M049516	5.171	https://www.genecards.org/cgi-bin/carddisp.pl?gene=QARS1
CCT4	Chaperonin Containing TCP1 Subunit 4	Protein Coding	40	GC02M061868	5.16074	https://www.genecards.org/cgi-bin/carddisp.pl?gene=CCT4
AP2A2	Adaptor Related Protein Complex 2 Subunit Alpha 2	Protein Coding	37	GC11P000924	5.14349	https://www.genecards.org/cgi-bin/carddisp.pl?gene=AP2A2
PGAM5	PGAM Family Member 5, Mitochondrial Serine/Threonine Protein Phosphatase	Protein Coding	34	GC12P132710	5.13085	https://www.genecards.org/cgi-bin/carddisp.pl?gene=PGAM5
MIR372	MicroRNA 372	RNA Gene	16	GC19P056829	5.11458	https://www.genecards.org/cgi-bin/carddisp.pl?gene=MIR372
MYO1D	Myosin ID	Protein Coding	40	GC17M032492	5.07513	https://www.genecards.org/cgi-bin/carddisp.pl?gene=MYO1D
ILF3	Interleukin Enhancer Binding Factor 3	Protein Coding	38	GC19P010655	5.04905	https://www.genecards.org/cgi-bin/carddisp.pl?gene=ILF3
PANX1	Pannexin 1	Protein Coding	43	GC11P094128	5.04029	https://www.genecards.org/cgi-bin/carddisp.pl?gene=PANX1
DDX60L	DExD/H-Box 60 Like	Protein Coding	32	GC04M168356	5.03846	https://www.genecards.org/cgi-bin/carddisp.pl?gene=DDX60L
HNRNPA3	Heterogeneous Nuclear Ribonucleoprotein A3	Protein Coding	38	GC02P177212	5.02645	https://www.genecards.org/cgi-bin/carddisp.pl?gene=HNRNPA3
LOC110366354	CYP3A4 5' Regulatory Region	Biological Region	1	GC07P099784	5.02628	https://www.genecards.org/cgi-bin/carddisp.pl?gene=LOC110366354
RPL24	Ribosomal Protein L24	Protein Coding	40	GC03M101681	5.02373	https://www.genecards.org/cgi-bin/carddisp.pl?gene=RPL24
PDCD1LG2	Programmed Cell Death 1 Ligand 2	Protein Coding	41	GC09P005510	5.01682	https://www.genecards.org/cgi-bin/carddisp.pl?gene=PDCD1LG2
RUVBL1	RuvB Like AAA ATPase 1	Protein Coding	44	GC03M128064	5.01574	https://www.genecards.org/cgi-bin/carddisp.pl?gene=RUVBL1
ACTR2	Actin Related Protein 2	Protein Coding	43	GC02P065227	4.94944	https://www.genecards.org/cgi-bin/carddisp.pl?gene=ACTR2
EDC4	Enhancer Of MRNA Decapping 4	Protein Coding	38	GC16P067873	4.93922	https://www.genecards.org/cgi-bin/carddisp.pl?gene=EDC4
MCHR1	Melanin Concentrating Hormone Receptor 1	Protein Coding	41	GC22P040679	4.93469	https://www.genecards.org/cgi-bin/carddisp.pl?gene=MCHR1
SEL1L3	SEL1L Family Member 3	Protein Coding	33	GC04M025715	4.93331	https://www.genecards.org/cgi-bin/carddisp.pl?gene=SEL1L3
DDX17	DEAD-Box Helicase 17	Protein Coding	41	GC22M038483	4.92793	https://www.genecards.org/cgi-bin/carddisp.pl?gene=DDX17
ENHO	Energy Homeostasis Associated	Protein Coding	29	GC09M034516	4.91997	https://www.genecards.org/cgi-bin/carddisp.pl?gene=ENHO
RNF114	Ring Finger Protein 114	Protein Coding	39	GC20P049936	4.91648	https://www.genecards.org/cgi-bin/carddisp.pl?gene=RNF114
SRSF7	Serine And Arginine Rich Splicing Factor 7	Protein Coding	40	GC02M038743	4.88962	https://www.genecards.org/cgi-bin/carddisp.pl?gene=SRSF7
TUBA1C	Tubulin Alpha 1c	Protein Coding	41	GC12P049188	4.87314	https://www.genecards.org/cgi-bin/carddisp.pl?gene=TUBA1C
CRTC1	CREB Regulated Transcription Coactivator 1	Protein Coding	43	GC19P027836	4.86344	https://www.genecards.org/cgi-bin/carddisp.pl?gene=CRTC1
ESM1	Endothelial Cell Specific Molecule 1	Protein Coding	39	GC05M054977	4.83737	https://www.genecards.org/cgi-bin/carddisp.pl?gene=ESM1
NFE2	Nuclear Factor, Erythroid 2	Protein Coding	41	GC12M054292	4.80734	https://www.genecards.org/cgi-bin/carddisp.pl?gene=NFE2
EIF4A1	Eukaryotic Translation Initiation Factor 4A1	Protein Coding	45	GC17P007572	4.77637	https://www.genecards.org/cgi-bin/carddisp.pl?gene=EIF4A1
AP2A1	Adaptor Related Protein Complex 2 Subunit Alpha 1	Protein Coding	40	GC19P049770	4.7467	https://www.genecards.org/cgi-bin/carddisp.pl?gene=AP2A1
YIPF1	Yip1 Domain Family Member 1	Protein Coding	36	GC01M053851	4.71777	https://www.genecards.org/cgi-bin/carddisp.pl?gene=YIPF1
C1QTNF9	C1q And TNF Related 9	Protein Coding	33	GC13P024307	4.71219	https://www.genecards.org/cgi-bin/carddisp.pl?gene=C1QTNF9
CAND1	Cullin Associated And Neddylation Dissociated 1	Protein Coding	38	GC12P067270	4.68792	https://www.genecards.org/cgi-bin/carddisp.pl?gene=CAND1
BBC3	BCL2 Binding Component 3	Protein Coding	41	GC19M047220	4.67903	https://www.genecards.org/cgi-bin/carddisp.pl?gene=BBC3
EIF4A3	Eukaryotic Translation Initiation Factor 4A3	Protein Coding	43	GC17M080135	4.6772	https://www.genecards.org/cgi-bin/carddisp.pl?gene=EIF4A3
ACTR3	Actin Related Protein 3	Protein Coding	42	GC02P113889	4.66457	https://www.genecards.org/cgi-bin/carddisp.pl?gene=ACTR3
OSTF1	Osteoclast Stimulating Factor 1	Protein Coding	39	GC09P075088	4.65988	https://www.genecards.org/cgi-bin/carddisp.pl?gene=OSTF1
CCT8	Chaperonin Containing TCP1 Subunit 8	Protein Coding	39	GC21M029055	4.61589	https://www.genecards.org/cgi-bin/carddisp.pl?gene=CCT8
RPS8	Ribosomal Protein S8	Protein Coding	39	GC01P044775	4.54473	https://www.genecards.org/cgi-bin/carddisp.pl?gene=RPS8
EIF3B	Eukaryotic Translation Initiation Factor 3 Subunit B	Protein Coding	39	GC07P002354	4.52522	https://www.genecards.org/cgi-bin/carddisp.pl?gene=EIF3B
NUDT21	Nudix Hydrolase 21	Protein Coding	37	GC16M056429	4.52375	https://www.genecards.org/cgi-bin/carddisp.pl?gene=NUDT21
CRACR2A	Calcium Release Activated Channel Regulator 2A	Protein Coding	31	GC12M004441	4.47432	https://www.genecards.org/cgi-bin/carddisp.pl?gene=CRACR2A
MYO1C	Myosin IC	Protein Coding	43	GC17M001464	4.47193	https://www.genecards.org/cgi-bin/carddisp.pl?gene=MYO1C
SEC16A	SEC16 Homolog A, Endoplasmic Reticulum Export Factor	Protein Coding	36	GC09M136440	4.44958	https://www.genecards.org/cgi-bin/carddisp.pl?gene=SEC16A
TCP1	T-Complex 1	Protein Coding	40	GC06M159778	4.43743	https://www.genecards.org/cgi-bin/carddisp.pl?gene=TCP1
RPL23A	Ribosomal Protein L23a	Protein Coding	41	GC17P028719	4.43297	https://www.genecards.org/cgi-bin/carddisp.pl?gene=RPL23A
RTRAF	RNA Transcription, Translation And Transport Factor	Protein Coding	29	GC14P051992	4.42281	https://www.genecards.org/cgi-bin/carddisp.pl?gene=RTRAF
G0S2	G0/G1 Switch 2	Protein Coding	32	GC01P209675	4.41872	https://www.genecards.org/cgi-bin/carddisp.pl?gene=G0S2
TMOD3	Tropomodulin 3	Protein Coding	38	GC15P051829	4.41425	https://www.genecards.org/cgi-bin/carddisp.pl?gene=TMOD3
CCT2	Chaperonin Containing TCP1 Subunit 2	Protein Coding	41	GC12P069585	4.40658	https://www.genecards.org/cgi-bin/carddisp.pl?gene=CCT2
WDR1	WD Repeat Domain 1	Protein Coding	40	GC04M010075	4.39292	https://www.genecards.org/cgi-bin/carddisp.pl?gene=WDR1
RUVBL2	RuvB Like AAA ATPase 2	Protein Coding	44	GC19P048993	4.38763	https://www.genecards.org/cgi-bin/carddisp.pl?gene=RUVBL2
TLCD4-RWDD3	TLCD4-RWDD3 Readthrough	Protein Coding	16	GC01P095119	4.3869	https://www.genecards.org/cgi-bin/carddisp.pl?gene=TLCD4-RWDD3
AATF	Apoptosis Antagonizing Transcription Factor	Protein Coding	40	GC17P036948	4.38237	https://www.genecards.org/cgi-bin/carddisp.pl?gene=AATF
RNF6	Ring Finger Protein 6	Protein Coding	40	GC13M026132	4.36757	https://www.genecards.org/cgi-bin/carddisp.pl?gene=RNF6
RRBP1	Ribosome Binding Protein 1	Protein Coding	40	GC20M017613	4.34278	https://www.genecards.org/cgi-bin/carddisp.pl?gene=RRBP1
SRRM1	Serine And Arginine Repetitive Matrix 1	Protein Coding	38	GC01P024631	4.33298	https://www.genecards.org/cgi-bin/carddisp.pl?gene=SRRM1
HKDC1	Hexokinase Domain Containing 1	Protein Coding	41	GC10P069220	4.32617	https://www.genecards.org/cgi-bin/carddisp.pl?gene=HKDC1
CCT3	Chaperonin Containing TCP1 Subunit 3	Protein Coding	41	GC01M156308	4.32286	https://www.genecards.org/cgi-bin/carddisp.pl?gene=CCT3
TMC4	Transmembrane Channel Like 4	Protein Coding	34	GC19M054160	4.31883	https://www.genecards.org/cgi-bin/carddisp.pl?gene=TMC4
NRG4	Neuregulin 4	Protein Coding	39	GC15M075935	4.31568	https://www.genecards.org/cgi-bin/carddisp.pl?gene=NRG4
PKNOX1	PBX/Knotted 1 Homeobox 1	Protein Coding	40	GC21P042974	4.31106	https://www.genecards.org/cgi-bin/carddisp.pl?gene=PKNOX1
CHST2	Carbohydrate Sulfotransferase 2	Protein Coding	38	GC03P143119	4.26908	https://www.genecards.org/cgi-bin/carddisp.pl?gene=CHST2
TXNL1	Thioredoxin Like 1	Protein Coding	39	GC18M056597	4.26566	https://www.genecards.org/cgi-bin/carddisp.pl?gene=TXNL1
SRSF4	Serine And Arginine Rich Splicing Factor 4	Protein Coding	38	GC01M029147	4.26444	https://www.genecards.org/cgi-bin/carddisp.pl?gene=SRSF4
TMBIM6	Transmembrane BAX Inhibitor Motif Containing 6	Protein Coding	37	GC12P049707	4.24397	https://www.genecards.org/cgi-bin/carddisp.pl?gene=TMBIM6
CCN4	Cellular Communication Network Factor 4	Protein Coding	30	GC08P133192	4.23331	https://www.genecards.org/cgi-bin/carddisp.pl?gene=CCN4
RBM14	RNA Binding Motif Protein 14	Protein Coding	36	GC11P066972	4.20101	https://www.genecards.org/cgi-bin/carddisp.pl?gene=RBM14
SF3B3	Splicing Factor 3b Subunit 3	Protein Coding	39	GC16P070523	4.18138	https://www.genecards.org/cgi-bin/carddisp.pl?gene=SF3B3
IBTK	Inhibitor Of Bruton Tyrosine Kinase	Protein Coding	39	GC06M082169	4.16943	https://www.genecards.org/cgi-bin/carddisp.pl?gene=IBTK
EIF3L	Eukaryotic Translation Initiation Factor 3 Subunit L	Protein Coding	38	GC22P037848	4.14162	https://www.genecards.org/cgi-bin/carddisp.pl?gene=EIF3L
LOC101928118	Uncharacterized LOC101928118	RNA Gene	11	GC01M095163	4.12628	https://www.genecards.org/cgi-bin/carddisp.pl?gene=LOC101928118
SIRT7	Sirtuin 7	Protein Coding	41	GC17M081911	4.1237	https://www.genecards.org/cgi-bin/carddisp.pl?gene=SIRT7
OPRD1	Opioid Receptor Delta 1	Protein Coding	44	GC01P028812	4.08067	https://www.genecards.org/cgi-bin/carddisp.pl?gene=OPRD1
USP4	Ubiquitin Specific Peptidase 4	Protein Coding	43	GC03M049277	4.05393	https://www.genecards.org/cgi-bin/carddisp.pl?gene=USP4
C1QTNF3	C1q And TNF Related 3	Protein Coding	37	GC05M034017	4.0403	https://www.genecards.org/cgi-bin/carddisp.pl?gene=C1QTNF3
PLPPR4	Phospholipid Phosphatase Related 4	Protein Coding	30	GC01P099262	4.00946	https://www.genecards.org/cgi-bin/carddisp.pl?gene=PLPPR4
CA1	Carbonic Anhydrase 1	Protein Coding	46	GC08M085327	3.98716	https://www.genecards.org/cgi-bin/carddisp.pl?gene=CA1
ILF2	Interleukin Enhancer Binding Factor 2	Protein Coding	39	GC01M153661	3.98352	https://www.genecards.org/cgi-bin/carddisp.pl?gene=ILF2
UBXN1	UBX Domain Protein 1	Protein Coding	36	GC11M071531	3.97829	https://www.genecards.org/cgi-bin/carddisp.pl?gene=UBXN1
EIF3E	Eukaryotic Translation Initiation Factor 3 Subunit E	Protein Coding	38	GC08M108163	3.9736	https://www.genecards.org/cgi-bin/carddisp.pl?gene=EIF3E
TEX36	Testis Expressed 36	Protein Coding	29	GC10M125576	3.96507	https://www.genecards.org/cgi-bin/carddisp.pl?gene=TEX36
ARPC2	Actin Related Protein 2/3 Complex Subunit 2	Protein Coding	41	GC02P218217	3.95256	https://www.genecards.org/cgi-bin/carddisp.pl?gene=ARPC2
PABPC4	Poly(A) Binding Protein Cytoplasmic 4	Protein Coding	41	GC01M039560	3.93535	https://www.genecards.org/cgi-bin/carddisp.pl?gene=PABPC4
PCSK7	Proprotein Convertase Subtilisin/Kexin Type 7	Protein Coding	44	GC11M117199	3.90448	https://www.genecards.org/cgi-bin/carddisp.pl?gene=PCSK7
GSTK1	Glutathione S-Transferase Kappa 1	Protein Coding	40	GC07P146111	3.88224	https://www.genecards.org/cgi-bin/carddisp.pl?gene=GSTK1
CKAP4	Cytoskeleton Associated Protein 4	Protein Coding	37	GC12M106237	3.85698	https://www.genecards.org/cgi-bin/carddisp.pl?gene=CKAP4
SUB1	SUB1 Regulator Of Transcription	Protein Coding	38	GC05P032544	3.83189	https://www.genecards.org/cgi-bin/carddisp.pl?gene=SUB1
MYBBP1A	MYB Binding Protein 1a	Protein Coding	40	GC17M004538	3.8271	https://www.genecards.org/cgi-bin/carddisp.pl?gene=MYBBP1A
LRRFIP2	LRR Binding FLII Interacting Protein 2	Protein Coding	38	GC03M037052	3.82543	https://www.genecards.org/cgi-bin/carddisp.pl?gene=LRRFIP2
LOC643339	Uncharacterized LOC643339	RNA Gene	9	GC12M093005	3.76594	https://www.genecards.org/cgi-bin/carddisp.pl?gene=LOC643339
HSD17B11	Hydroxysteroid 17-Beta Dehydrogenase 11	Protein Coding	40	GC04M087336	3.75902	https://www.genecards.org/cgi-bin/carddisp.pl?gene=HSD17B11
NLRP2	NLR Family Pyrin Domain Containing 2	Protein Coding	41	GC19P054953	3.75713	https://www.genecards.org/cgi-bin/carddisp.pl?gene=NLRP2
FAM3B	FAM3 Metabolism Regulating Signaling Molecule B	Protein Coding	38	GC21P041304	3.74795	https://www.genecards.org/cgi-bin/carddisp.pl?gene=FAM3B
JRKL	JRK Like	Protein Coding	33	GC11P096389	3.73956	https://www.genecards.org/cgi-bin/carddisp.pl?gene=JRKL
S100A11	S100 Calcium Binding Protein A11	Protein Coding	42	GC01M152032	3.72242	https://www.genecards.org/cgi-bin/carddisp.pl?gene=S100A11
LATS2	Large Tumor Suppressor Kinase 2	Protein Coding	45	GC13M020973	3.70142	https://www.genecards.org/cgi-bin/carddisp.pl?gene=LATS2
UBE2D3	Ubiquitin Conjugating Enzyme E2 D3	Protein Coding	46	GC04M102794	3.67846	https://www.genecards.org/cgi-bin/carddisp.pl?gene=UBE2D3
PHF2	PHD Finger Protein 2	Protein Coding	39	GC09P093576	3.67616	https://www.genecards.org/cgi-bin/carddisp.pl?gene=PHF2
FAM3A	FAM3 Metabolism Regulating Signaling Molecule A	Protein Coding	36	GC0XM154506	3.66712	https://www.genecards.org/cgi-bin/carddisp.pl?gene=FAM3A
SRRM2	Serine/Arginine Repetitive Matrix 2	Protein Coding	34	GC16P006215	3.66537	https://www.genecards.org/cgi-bin/carddisp.pl?gene=SRRM2
PRDX4	Peroxiredoxin 4	Protein Coding	43	GC0XP023665	3.63138	https://www.genecards.org/cgi-bin/carddisp.pl?gene=PRDX4
CARD6	Caspase Recruitment Domain Family Member 6	Protein Coding	38	GC05P040841	3.60704	https://www.genecards.org/cgi-bin/carddisp.pl?gene=CARD6
MYL6B	Myosin Light Chain 6B	Protein Coding	39	GC12P056479	3.60446	https://www.genecards.org/cgi-bin/carddisp.pl?gene=MYL6B
RNU6-53P	RNA, U6 Small Nuclear 53, Pseudogene	Pseudogene	8	GC13M028703	3.59316	https://www.genecards.org/cgi-bin/carddisp.pl?gene=RNU6-53P
DDX46	DEAD-Box Helicase 46	Protein Coding	39	GC05P134758	3.56908	https://www.genecards.org/cgi-bin/carddisp.pl?gene=DDX46
EIF4A2	Eukaryotic Translation Initiation Factor 4A2	Protein Coding	45	GC03P186783	3.52136	https://www.genecards.org/cgi-bin/carddisp.pl?gene=EIF4A2
SFRP5	Secreted Frizzled Related Protein 5	Protein Coding	38	GC10M097766	3.46477	https://www.genecards.org/cgi-bin/carddisp.pl?gene=SFRP5
ANKK1	Ankyrin Repeat And Kinase Domain Containing 1	Protein Coding	38	GC11P113387	3.42894	https://www.genecards.org/cgi-bin/carddisp.pl?gene=ANKK1
MIR1296	MicroRNA 1296	RNA Gene	16	GC10M063372	3.39249	https://www.genecards.org/cgi-bin/carddisp.pl?gene=MIR1296
VSIG4	V-Set And Immunoglobulin Domain Containing 4	Protein Coding	37	GC0XM066021	3.37692	https://www.genecards.org/cgi-bin/carddisp.pl?gene=VSIG4
ZBTB7A	Zinc Finger And BTB Domain Containing 7A	Protein Coding	36	GC19M004045	3.34749	https://www.genecards.org/cgi-bin/carddisp.pl?gene=ZBTB7A
DHX15	DEAH-Box Helicase 15	Protein Coding	38	GC04M024519	3.33452	https://www.genecards.org/cgi-bin/carddisp.pl?gene=DHX15
METTL7B	Methyltransferase Like 7B	Protein Coding	36	GC12P055681	3.29022	https://www.genecards.org/cgi-bin/carddisp.pl?gene=METTL7B
EBNA1BP2	EBNA1 Binding Protein 2	Protein Coding	37	GC01M043165	3.25885	https://www.genecards.org/cgi-bin/carddisp.pl?gene=EBNA1BP2
RTCB	RNA 2',3'-Cyclic Phosphate And 5'-OH Ligase	Protein Coding	35	GC22M032387	3.25418	https://www.genecards.org/cgi-bin/carddisp.pl?gene=RTCB
TSKU	Tsukushi, Small Leucine Rich Proteoglycan	Protein Coding	34	GC11P076782	3.24846	https://www.genecards.org/cgi-bin/carddisp.pl?gene=TSKU
DUSP26	Dual Specificity Phosphatase 26	Protein Coding	36	GC08M033591	3.22905	https://www.genecards.org/cgi-bin/carddisp.pl?gene=DUSP26
GGT3P	Gamma-Glutamyltransferase 3 Pseudogene	Pseudogene	19	GC22M018773	3.22465	https://www.genecards.org/cgi-bin/carddisp.pl?gene=GGT3P
LINC01684	Long Intergenic Non-Protein Coding RNA 1684	RNA Gene	9	GC21P024306	3.2173	https://www.genecards.org/cgi-bin/carddisp.pl?gene=LINC01684
HTR1D	5-Hydroxytryptamine Receptor 1D	Protein Coding	46	GC01M023191	3.21686	https://www.genecards.org/cgi-bin/carddisp.pl?gene=HTR1D
USP10	Ubiquitin Specific Peptidase 10	Protein Coding	44	GC16P084734	3.21555	https://www.genecards.org/cgi-bin/carddisp.pl?gene=USP10
ANGPTL2	Angiopoietin Like 2	Protein Coding	35	GC09M127087	3.21241	https://www.genecards.org/cgi-bin/carddisp.pl?gene=ANGPTL2
MSBP2	Minisatellite Binding Protein 2	Protein Coding	4	GC00U990214	3.1841	https://www.genecards.org/cgi-bin/carddisp.pl?gene=MSBP2
DNAJC15	DnaJ Heat Shock Protein Family (Hsp40) Member C15	Protein Coding	36	GC13P043023	3.14864	https://www.genecards.org/cgi-bin/carddisp.pl?gene=DNAJC15
MALRD1	MAM And LDL Receptor Class A Domain Containing 1	Protein Coding	26	GC10P019048	3.1147	https://www.genecards.org/cgi-bin/carddisp.pl?gene=MALRD1
DEFA1	Defensin Alpha 1	Protein Coding	41	GC08M006977	3.07209	https://www.genecards.org/cgi-bin/carddisp.pl?gene=DEFA1
H2BC11	H2B Clustered Histone 11	Protein Coding	29	GC06M048802	3.02226	https://www.genecards.org/cgi-bin/carddisp.pl?gene=H2BC11
KDM4B	Lysine Demethylase 4B	Protein Coding	45	GC19P004969	2.98424	https://www.genecards.org/cgi-bin/carddisp.pl?gene=KDM4B
REPIN1	Replication Initiator 1	Protein Coding	34	GC07P150368	2.97662	https://www.genecards.org/cgi-bin/carddisp.pl?gene=REPIN1
RSPO3	R-Spondin 3	Protein Coding	37	GC06P127118	2.93594	https://www.genecards.org/cgi-bin/carddisp.pl?gene=RSPO3
TRPC4AP	Transient Receptor Potential Cation Channel Subfamily C Member 4 Associated Protein	Protein Coding	37	GC20M035002	2.92172	https://www.genecards.org/cgi-bin/carddisp.pl?gene=TRPC4AP
SDF2L1	Stromal Cell Derived Factor 2 Like 1	Protein Coding	34	GC22P027270	2.79416	https://www.genecards.org/cgi-bin/carddisp.pl?gene=SDF2L1
CLGN	Calmegin	Protein Coding	37	GC04M140388	2.77921	https://www.genecards.org/cgi-bin/carddisp.pl?gene=CLGN
COP1	COP1 E3 Ubiquitin Ligase	Protein Coding	33	GC01M175944	2.73685	https://www.genecards.org/cgi-bin/carddisp.pl?gene=COP1
IGHG4	Immunoglobulin Heavy Constant Gamma 4 (G4m Marker)	Protein Coding	27	GC14M110576	2.73627	https://www.genecards.org/cgi-bin/carddisp.pl?gene=IGHG4
ARPC4	Actin Related Protein 2/3 Complex Subunit 4	Protein Coding	38	GC03P009792	2.72321	https://www.genecards.org/cgi-bin/carddisp.pl?gene=ARPC4
HMCES	5-Hydroxymethylcytosine Binding, ES Cell Specific	Protein Coding	31	GC03P129278	2.69897	https://www.genecards.org/cgi-bin/carddisp.pl?gene=HMCES
GLT8D2	Glycosyltransferase 8 Domain Containing 2	Protein Coding	36	GC12M103988	2.67279	https://www.genecards.org/cgi-bin/carddisp.pl?gene=GLT8D2
CELF5	CUGBP Elav-Like Family Member 5	Protein Coding	34	GC19P003224	2.6649	https://www.genecards.org/cgi-bin/carddisp.pl?gene=CELF5
TRIM47	Tripartite Motif Containing 47	Protein Coding	34	GC17M075874	2.64794	https://www.genecards.org/cgi-bin/carddisp.pl?gene=TRIM47
H2BC18	H2B Clustered Histone 18	Protein Coding	27	GC01M150196	2.64703	https://www.genecards.org/cgi-bin/carddisp.pl?gene=H2BC18
RAB32	RAB32, Member RAS Oncogene Family	Protein Coding	38	GC06P146543	2.59204	https://www.genecards.org/cgi-bin/carddisp.pl?gene=RAB32
HSP90AA2P	Heat Shock Protein 90 Alpha Family Class A Member 2, Pseudogene	Pseudogene	19	GC11M027888	2.56173	https://www.genecards.org/cgi-bin/carddisp.pl?gene=HSP90AA2P
VN2R20P	Vomeronasal 2 Receptor 20 Pseudogene	Pseudogene	3	GC21P023910	2.55951	https://www.genecards.org/cgi-bin/carddisp.pl?gene=VN2R20P
YTHDC2	YTH Domain Containing 2	Protein Coding	36	GC05P113513	2.5274	https://www.genecards.org/cgi-bin/carddisp.pl?gene=YTHDC2
RPL17-C18orf32	RPL17-C18orf32 Readthrough	Protein Coding	20	GC18M049481	2.48198	https://www.genecards.org/cgi-bin/carddisp.pl?gene=RPL17-C18orf32
DNAJC11	DnaJ Heat Shock Protein Family (Hsp40) Member C11	Protein Coding	34	GC01M006634	2.47342	https://www.genecards.org/cgi-bin/carddisp.pl?gene=DNAJC11
MAPRE1P1	MAPRE1 Pseudogene 1	Pseudogene	6	GC08M135623	2.44221	https://www.genecards.org/cgi-bin/carddisp.pl?gene=MAPRE1P1
RPS27P18	Ribosomal Protein S27 Pseudogene 18	Pseudogene	6	GC10M125473	2.39456	https://www.genecards.org/cgi-bin/carddisp.pl?gene=RPS27P18
HCAR2	Hydroxycarboxylic Acid Receptor 2	Protein Coding	38	GC12M122701	2.39375	https://www.genecards.org/cgi-bin/carddisp.pl?gene=HCAR2
SLC7A3	Solute Carrier Family 7 Member 3	Protein Coding	38	GC0XM070926	2.37594	https://www.genecards.org/cgi-bin/carddisp.pl?gene=SLC7A3
RPS9P3	Ribosomal Protein S9 Pseudogene 3	Pseudogene	6	GC05P098954	2.3039	https://www.genecards.org/cgi-bin/carddisp.pl?gene=RPS9P3
MIR1224	MicroRNA 1224	RNA Gene	19	GC03P184241	2.29523	https://www.genecards.org/cgi-bin/carddisp.pl?gene=MIR1224
MTCO2P1	MT-CO2 Pseudogene 1	Pseudogene	7	GC20M060414	2.28771	https://www.genecards.org/cgi-bin/carddisp.pl?gene=MTCO2P1
RPL29P8	Ribosomal Protein L29 Pseudogene 8	Pseudogene	4	GC02M176807	2.20874	https://www.genecards.org/cgi-bin/carddisp.pl?gene=RPL29P8
CKS1BP2	CDC28 Protein Kinase Regulatory Subunit 1B Pseudogene 2	Pseudogene	6	GC10P029697	2.19706	https://www.genecards.org/cgi-bin/carddisp.pl?gene=CKS1BP2
FAM8A6P	Family With Sequence Similarity 8 Member A6, Pseudogene	Pseudogene	6	GC06M134603	2.19706	https://www.genecards.org/cgi-bin/carddisp.pl?gene=FAM8A6P
IGKV2D-23	Immunoglobulin Kappa Variable 2D-23 (Pseudogene)	Pseudogene	5	GC02P090794	2.19409	https://www.genecards.org/cgi-bin/carddisp.pl?gene=IGKV2D-23
RPL41P5	Ribosomal Protein L41 Pseudogene 5	Pseudogene	8	GC12M093083	2.11693	https://www.genecards.org/cgi-bin/carddisp.pl?gene=RPL41P5
ASS1P8	Argininosuccinate Synthetase 1 Pseudogene 8	Pseudogene	6	GC04M148526	2.11693	https://www.genecards.org/cgi-bin/carddisp.pl?gene=ASS1P8
MIR631	MicroRNA 631	RNA Gene	16	GC15M075353	2.04304	https://www.genecards.org/cgi-bin/carddisp.pl?gene=MIR631
DUSP14	Dual Specificity Phosphatase 14	Protein Coding	37	GC17P037489	2.04025	https://www.genecards.org/cgi-bin/carddisp.pl?gene=DUSP14
MIR103B2	MicroRNA 103b-2	RNA Gene	9	GC20M003899	2.01795	https://www.genecards.org/cgi-bin/carddisp.pl?gene=MIR103B2
MIR103B1	MicroRNA 103b-1	RNA Gene	8	GC05P168560	2.01795	https://www.genecards.org/cgi-bin/carddisp.pl?gene=MIR103B1
YIPF6	Yip1 Domain Family Member 6	Protein Coding	34	GC0XP068498	1.9362	https://www.genecards.org/cgi-bin/carddisp.pl?gene=YIPF6
HERC4	HECT And RLD Domain Containing E3 Ubiquitin Protein Ligase 4	Protein Coding	36	GC10M067921	1.89386	https://www.genecards.org/cgi-bin/carddisp.pl?gene=HERC4
LINC00333	Long Intergenic Non-Protein Coding RNA 333	RNA Gene	13	GC13P084140	1.87635	https://www.genecards.org/cgi-bin/carddisp.pl?gene=LINC00333
PHLPP2	PH Domain And Leucine Rich Repeat Protein Phosphatase 2	Protein Coding	41	GC16M071637	1.84355	https://www.genecards.org/cgi-bin/carddisp.pl?gene=PHLPP2
SAP18	Sin3A Associated Protein 18	Protein Coding	38	GC13P021140	1.69453	https://www.genecards.org/cgi-bin/carddisp.pl?gene=SAP18
SUCNR1	Succinate Receptor 1	Protein Coding	40	GC03P151873	1.69105	https://www.genecards.org/cgi-bin/carddisp.pl?gene=SUCNR1
PRMT3	Protein Arginine Methyltransferase 3	Protein Coding	41	GC11P020409	1.67134	https://www.genecards.org/cgi-bin/carddisp.pl?gene=PRMT3
NMBR	Neuromedin B Receptor	Protein Coding	43	GC06M142059	1.61796	https://www.genecards.org/cgi-bin/carddisp.pl?gene=NMBR
MIR190B	MicroRNA 190b	RNA Gene	15	GC01M154193	1.59754	https://www.genecards.org/cgi-bin/carddisp.pl?gene=MIR190B
ADIPQTL3	Circulating Adiponectin QTL On Chromosome 14	Genetic Locus	1	GC14U901513	1.30271	https://www.genecards.org/cgi-bin/carddisp.pl?gene=ADIPQTL3
FAM174A	Family With Sequence Similarity 174 Member A	Protein Coding	31	GC05P100535	1.03656	https://www.genecards.org/cgi-bin/carddisp.pl?gene=FAM174A
					13.1396
