# Supplementary material for: Investigation of the potential mechanism of the Shugan Xiaozhi decoction for the treatment of nonalcoholic fatty liver disease based on network pharmacology, molecular docking and molecular dynamics simulation
Source: PeerJ journal article supplement (doi:10.7717/peerj.14171), 2022-11-10
Supplement: Supplementary_Table_S3.xlsx [file Supplementary_Table_S3.xlsx]

## Sheet: Sheet1
Query Smiles	Target ID	Affinity Threshold (nM)	P-Value	Max Tc	Cut Sum	Z-Score	Name	Description
C1=C(C=C(C(=C1O)O)O)C(=O)O	6PGD_HUMAN	5	1.221e-15	0.2889	0.5778	26.3302	PGD	6-phosphogluconate dehydrogenase, decarboxylating
C1=C(C=C(C(=C1O)O)O)C(=O)O	AK1C1_HUMAN	5	9.607e-24	0.3448	2.4791	40.8736	AKR1C1	Aldo-keto reductase family 1 member C1
C1=C(C=C(C(=C1O)O)O)C(=O)O	AK1C2_HUMAN	5	1.96e-20	0.3462	3.4213	34.9315	AKR1C2	Aldo-keto reductase family 1 member C2
C1=C(C=C(C(=C1O)O)O)C(=O)O	AK1C3_HUMAN	5	1.057e-12	0.3462	5.1789	21.0508	AKR1C3	Aldo-keto reductase family 1 member C3
C1=C(C=C(C(=C1O)O)O)C(=O)O	AMY1A_HUMAN	5	7.402e-18	0.3415	0.3415	30.3049	AMY1A	Alpha-amylase 1
C1=C(C=C(C(=C1O)O)O)C(=O)O	ANTR2_HUMAN	5	2.157e-21	0.3415	0.3415	36.6522	ANTXR2	Anthrax toxin receptor 2
C1=C(C=C(C(=C1O)O)O)C(=O)O	CAH12_HUMAN	5	1.262e-05	1	7.9909	8.3448	CA12	Carbonic anhydrase 12
C1=C(C=C(C(=C1O)O)O)C(=O)O	CAH14_HUMAN	5	2.974e-13	1	6.2646	22.0392	CA14	Carbonic anhydrase 14
C1=C(C=C(C(=C1O)O)O)C(=O)O	CAH1_HUMAN	5	1.28e-07	1	15.207	11.9249	CA1	Carbonic anhydrase 1
C1=C(C=C(C(=C1O)O)O)C(=O)O	CAH3_HUMAN	5	1.854e-18	1	2.216	31.3842	CA3	Carbonic anhydrase 3
C1=C(C=C(C(=C1O)O)O)C(=O)O	CAH2_HUMAN	5	9.706e-07	1	15.5955	10.3451	CA2	Carbonic anhydrase 2
C1=C(C=C(C(=C1O)O)O)C(=O)O	CAH4_HUMAN	5	5.092e-06	1	2.6237	9.0527	CA4	Carbonic anhydrase 4
C1=C(C=C(C(=C1O)O)O)C(=O)O	CAH5A_HUMAN	5	5.412e-10	1	2.8635	16.1866	CA5A	Carbonic anhydrase 5A, mitochondrial
C1=C(C=C(C(=C1O)O)O)C(=O)O	CAH5B_HUMAN	5	1.253e-08	1	2.0732	13.7369	CA5B	Carbonic anhydrase 5B, mitochondrial
C1=C(C=C(C(=C1O)O)O)C(=O)O	CAH6_HUMAN	5	2.22e-16	1	4.1851	27.7578	CA6	Carbonic anhydrase 6
C1=C(C=C(C(=C1O)O)O)C(=O)O	CAH7_HUMAN	5	3.362e-10	1	5.6479	16.5577	CA7	Carbonic anhydrase 7
C1=C(C=C(C(=C1O)O)O)C(=O)O	CAH9_HUMAN	5	0.0001488	1	7.6205	6.4215	CA9	Carbonic anhydrase 9
C1=C(C=C(C(=C1O)O)O)C(=O)O	CTRC_HUMAN	5	3.77e-06	0.3429	0.6672	9.2872	CTRC	Chymotrypsin-C
C1=C(C=C(C(=C1O)O)O)C(=O)O	DHB14_HUMAN	5	3.322e-08	0.2895	0.5752	12.9764	HSD17B14	17-beta-hydroxysteroid dehydrogenase 14
C1=C(C=C(C(=C1O)O)O)C(=O)O	DPOLA_HUMAN	5	2.787e-08	0.6538	0.6538	13.1135	POLA1	DNA polymerase alpha catalytic subunit
C1=C(C=C(C(=C1O)O)O)C(=O)O	DPOLB_HUMAN	5	1.518e-10	0.6538	0.6538	17.1779	POLB	DNA polymerase beta
C1=C(C=C(C(=C1O)O)O)C(=O)O	DPP4_HUMAN	5	0.8551	1	1.6027	-0.9634	DPP4	Dipeptidyl peptidase 4
C1=C(C=C(C(=C1O)O)O)C(=O)O	ELAV3_HUMAN	5	6.464e-12	0.2903	0.2903	19.6386	ELAVL3	ELAV-like protein 3
C1=C(C=C(C(=C1O)O)O)C(=O)O	ERN1_HUMAN	5	1.336e-07	0.3636	3.1815	11.8911	ERN1	Serine/threonine-protein kinase/endoribonuclease IRE1
C1=C(C=C(C(=C1O)O)O)C(=O)O	EST1_HUMAN	5	2.399e-07	0.36	2.1437	11.435	CES1	Liver carboxylesterase 1
C1=C(C=C(C(=C1O)O)O)C(=O)O	EST2_HUMAN	5	2.254e-14	0.36	2.7363	24.0494	CES2	Cocaine esterase
C1=C(C=C(C(=C1O)O)O)C(=O)O	FTO_HUMAN	5	5.318e-14	0.3448	0.3448	23.3815	FTO	Alpha-ketoglutarate-dependent dioxygenase FTO
C1=C(C=C(C(=C1O)O)O)C(=O)O	FUT4_HUMAN	5	1.572e-36	0.2889	0.2889	63.8285	FUT4	Alpha-(1,3)-fucosyltransferase 4
C1=C(C=C(C(=C1O)O)O)C(=O)O	FUT7_HUMAN	5	9.099e-79	1	1.8089	139.658	FUT7	Alpha-(1,3)-fucosyltransferase 7
C1=C(C=C(C(=C1O)O)O)C(=O)O	GBRB1_HUMAN	5	2.422e-08	0.2941	0.2941	13.2229	GABRB1	Gamma-aminobutyric acid receptor subunit beta-1
C1=C(C=C(C(=C1O)O)O)C(=O)O	GLRA3_HUMAN	5	1.535e-11	0.3929	0.3929	18.9642	GLRA3	Glycine receptor subunit alpha-3
C1=C(C=C(C(=C1O)O)O)C(=O)O	GLRB_HUMAN	5	5.89e-07	0.3929	0.3929	10.7346	GLRB	Glycine receptor subunit beta
C1=C(C=C(C(=C1O)O)O)C(=O)O	GPR35_HUMAN	5	2.29e-08	0.4839	2.34	13.2665	GPR35	G-protein coupled receptor 35
C1=C(C=C(C(=C1O)O)O)C(=O)O	HIF1N_HUMAN	5	1.973e-43	0.3448	0.3448	76.2189	HIF1AN	Hypoxia-inducible factor 1-alpha inhibitor
C1=C(C=C(C(=C1O)O)O)C(=O)O	HMGB1_HUMAN	5	6.243e-24	0.2941	0.2941	41.2096	HMGB1	High mobility group protein B1
C1=C(C=C(C(=C1O)O)O)C(=O)O	HS71A_HUMAN	5	5.875e-06	0.2903	0.2903	8.9412	HSPA1A	Heat shock 70 kDa protein 1A
C1=C(C=C(C(=C1O)O)O)C(=O)O	IBP1_HUMAN	5	5.379e-25	0.3077	0.3077	43.121	IGFBP1	Insulin-like growth factor-binding protein 1
C1=C(C=C(C(=C1O)O)O)C(=O)O	IBP2_HUMAN	5	5.379e-25	0.3077	0.3077	43.121	IGFBP2	Insulin-like growth factor-binding protein 2
C1=C(C=C(C(=C1O)O)O)C(=O)O	IBP3_HUMAN	5	2.22e-07	0.3077	0.5972	11.4955	IGFBP3	Insulin-like growth factor-binding protein 3
C1=C(C=C(C(=C1O)O)O)C(=O)O	IBP4_HUMAN	5	5.379e-25	0.3077	0.3077	43.121	IGFBP4	Insulin-like growth factor-binding protein 4
C1=C(C=C(C(=C1O)O)O)C(=O)O	IBP6_HUMAN	5	5.379e-25	0.3077	0.3077	43.121	IGFBP6	Insulin-like growth factor-binding protein 6
C1=C(C=C(C(=C1O)O)O)C(=O)O	IBP5_HUMAN	5	8.149e-10	0.3077	0.3077	15.8674	IGFBP5	Insulin-like growth factor-binding protein 5
C1=C(C=C(C(=C1O)O)O)C(=O)O	KDM2A_HUMAN	5	3.196e-09	0.3448	0.9336	14.802	KDM2A	Lysine-specific demethylase 2A
C1=C(C=C(C(=C1O)O)O)C(=O)O	KDM3A_HUMAN	5	2.22e-16	0.3448	0.9336	27.8093	KDM3A	Lysine-specific demethylase 3A
C1=C(C=C(C(=C1O)O)O)C(=O)O	KDM4D_HUMAN	5	2.332e-06	0.3448	0.3448	9.6615	KDM4D	Lysine-specific demethylase 4D
C1=C(C=C(C(=C1O)O)O)C(=O)O	KDM4E_HUMAN	5	1.75e-13	0.3448	1.2156	22.4531	KDM4E	Lysine-specific demethylase 4E
C1=C(C=C(C(=C1O)O)O)C(=O)O	KDM5C_HUMAN	5	2.969e-06	0.3448	0.9336	9.4735	KDM5C	Lysine-specific demethylase 5C
C1=C(C=C(C(=C1O)O)O)C(=O)O	LYAM1_HUMAN	5	3.522e-25	0.4167	1.7106	43.4512	SELL	L-selectin
C1=C(C=C(C(=C1O)O)O)C(=O)O	LYAM2_HUMAN	5	5.107e-15	0.4412	2.8493	25.2094	SELE	E-selectin
C1=C(C=C(C(=C1O)O)O)C(=O)O	LYAM3_HUMAN	5	3.331e-16	0.4167	2.0183	27.3914	SELP	P-selectin
C1=C(C=C(C(=C1O)O)O)C(=O)O	NEUR3_HUMAN	5	2.409e-06	0.2895	0.2895	9.6362	NEU3	Sialidase-3
C1=C(C=C(C(=C1O)O)O)C(=O)O	NR4A1_HUMAN	5	7.204e-06	0.3667	0.6608	8.7823	NR4A1	Nuclear receptor subfamily 4 group A member 1
C1=C(C=C(C(=C1O)O)O)C(=O)O	OXDD_HUMAN	5	1.353e-21	0.3448	0.3448	37.0157	DDO	D-aspartate oxidase
C1=C(C=C(C(=C1O)O)O)C(=O)O	P4HA1_HUMAN	5	1.474e-56	0.3214	0.9259	99.7852	P4HA1	Prolyl 4-hydroxylase subunit alpha-1
C1=C(C=C(C(=C1O)O)O)C(=O)O	P4HTM_HUMAN	5	6.227e-07	0.3214	0.6318	10.6912	P4HTM	Transmembrane prolyl 4-hydroxylase
C1=C(C=C(C(=C1O)O)O)C(=O)O	PAI1_HUMAN	5	1.888e-22	0.5	5.1969	38.5514	SERPINE1	Plasminogen activator inhibitor 1
C1=C(C=C(C(=C1O)O)O)C(=O)O	PAR15_HUMAN	5	5.388e-10	0.2903	0.2903	16.19	PARP15	Protein mono-ADP-ribosyltransferase PARP15
C1=C(C=C(C(=C1O)O)O)C(=O)O	PGAM1_HUMAN	5	3.143e-18	0.2889	0.2889	30.9729	PGAM1	Phosphoglycerate mutase 1
C1=C(C=C(C(=C1O)O)O)C(=O)O	POLH_HUMAN	5	2.665e-15	0.2903	0.2903	25.7274	POLH	DNA polymerase eta
C1=C(C=C(C(=C1O)O)O)C(=O)O	POLI_HUMAN	5	2.576e-18	0.2903	0.2903	31.1277	POLI	DNA polymerase iota
C1=C(C=C(C(=C1O)O)O)C(=O)O	RARB_HUMAN	5	3.522e-07	0.3243	2.0704	11.1354	RARB	Retinoic acid receptor beta
C1=C(C=C(C(=C1O)O)O)C(=O)O	RARG_HUMAN	5	2.541e-06	0.3243	1.7704	9.5947	RARG	Retinoic acid receptor gamma
C1=C(C=C(C(=C1O)O)O)C(=O)O	S22A6_HUMAN	5	4.159e-09	0.2973	0.5876	14.5964	SLC22A6	Solute carrier family 22 member 6
C1=C(C=C(C(=C1O)O)O)C(=O)O	S5A2_HUMAN	5	5.396e-14	0.3913	5.7073	23.3702	SRD5A2	3-oxo-5-alpha-steroid 4-dehydrogenase 2
C1=C(C=C(C(=C1O)O)O)C(=O)O	SDF1_HUMAN	5	5.327e-06	0.2927	0.2927	9.0175	CXCL12	Stromal cell-derived factor 1
C1=C(C=C(C(=C1O)O)O)C(=O)O	SIAT6_HUMAN	5	1.605e-23	0.2889	0.2889	40.4734	ST3GAL3	CMP-N-acetylneuraminate-beta-1,4-galactoside alpha-2,3-sialyltransferase
C1=C(C=C(C(=C1O)O)O)C(=O)O	SMAD3_HUMAN	5	1.849e-07	0.2903	0.2903	11.638	SMAD3	Mothers against decapentaplegic homolog 3
C1=C(C=C(C(=C1O)O)O)C(=O)O	TOP1_HUMAN	5	1.1e-08	0.4815	2.6078	13.8379	TOP1	DNA topoisomerase 1
C1=C(C=C(C(=C1O)O)O)C(=O)O	TPMT_HUMAN	5	1.215e-87	0.4667	2.2701	155.591	TPMT	Thiopurine S-methyltransferase
C1=C(C=C(C(=C1O)O)O)C(=O)O	TTHY_HUMAN	5	2.142e-20	0.4062	2.9554	34.8626	TTR	Transthyretin
C1=C(C=C(C(=C1O)O)O)C(=O)O	TYRO_HUMAN	5	1.894e-08	0.4348	0.8062	13.4147	TYR	Tyrosinase
C1=C(C=C(C(=C1O)O)O)C(=O)O	XCT_HUMAN	5	1.106e-07	0.3	0.3	12.0389	SLC7A11	Cystine/glutamate transporter
CC1C(C(C(C(O1)OC2C(C(C(OC2OC3=CC(=C4C(=O)CC(OC4=C3)C5=CC=C(C=C5)O)O)CO)O)O)O)O)O	AL1A2_HUMAN	5	2.22e-12	0.3951	0.3951	20.4704	ALDH1A2	Retinal dehydrogenase 2
CC1C(C(C(C(O1)OC2C(C(C(OC2OC3=CC(=C4C(=O)CC(OC4=C3)C5=CC=C(C=C5)O)O)CO)O)O)O)O)O	AL1B1_HUMAN	5	2.58e-13	0.3951	0.3951	22.1497	ALDH1B1	Aldehyde dehydrogenase X, mitochondrial
CC1C(C(C(C(O1)OC2C(C(C(OC2OC3=CC(=C4C(=O)CC(OC4=C3)C5=CC=C(C=C5)O)O)CO)O)O)O)O)O	AMY1A_HUMAN	5	1.57e-31	0.3176	0.6157	54.8536	AMY1A	Alpha-amylase 1
CC1C(C(C(C(O1)OC2C(C(C(OC2OC3=CC(=C4C(=O)CC(OC4=C3)C5=CC=C(C=C5)O)O)CO)O)O)O)O)O	AMYP_HUMAN	5	6.46e-60	0.3571	0.9817	105.815	AMY2A	Pancreatic alpha-amylase
CC1C(C(C(C(O1)OC2C(C(C(OC2OC3=CC(=C4C(=O)CC(OC4=C3)C5=CC=C(C=C5)O)O)CO)O)O)O)O)O	CAH13_HUMAN	5	7.5e-08	0.3373	1.8899	12.3414	CA13	Carbonic anhydrase 13
CC1C(C(C(C(O1)OC2C(C(C(OC2OC3=CC(=C4C(=O)CC(OC4=C3)C5=CC=C(C=C5)O)O)CO)O)O)O)O)O	CAH14_HUMAN	5	4.3e-08	0.3297	3.7879	12.7752	CA14	Carbonic anhydrase 14
CC1C(C(C(C(O1)OC2C(C(C(OC2OC3=CC(=C4C(=O)CC(OC4=C3)C5=CC=C(C=C5)O)O)CO)O)O)O)O)O	CAH12_HUMAN	5	2.3e-09	0.4	12.9852	15.0584	CA12	Carbonic anhydrase 12
CC1C(C(C(C(O1)OC2C(C(C(OC2OC3=CC(=C4C(=O)CC(OC4=C3)C5=CC=C(C=C5)O)O)CO)O)O)O)O)O	CAH4_HUMAN	5	1.07e-06	0.4	2.9297	10.2664	CA4	Carbonic anhydrase 4
CC1C(C(C(C(O1)OC2C(C(C(OC2OC3=CC(=C4C(=O)CC(OC4=C3)C5=CC=C(C=C5)O)O)CO)O)O)O)O)O	CAH7_HUMAN	5	1.55e-06	0.4	3.5921	9.9798	CA7	Carbonic anhydrase 7
CC1C(C(C(C(O1)OC2C(C(C(OC2OC3=CC(=C4C(=O)CC(OC4=C3)C5=CC=C(C=C5)O)O)CO)O)O)O)O)O	CAH9_HUMAN	5	8.94e-08	0.3671	12.5223	12.2042	CA9	Carbonic anhydrase 9
CC1C(C(C(C(O1)OC2C(C(C(OC2OC3=CC(=C4C(=O)CC(OC4=C3)C5=CC=C(C=C5)O)O)CO)O)O)O)O)O	CBS_HUMAN	5	3.54e-11	0.3	0.3	18.3123	CBS	Cystathionine beta-synthase
CC1C(C(C(C(O1)OC2C(C(C(OC2OC3=CC(=C4C(=O)CC(OC4=C3)C5=CC=C(C=C5)O)O)CO)O)O)O)O)O	CD22_HUMAN	5	4.96e-24	0.3113	1.4672	41.3896	CD22	B-cell receptor CD22
CC1C(C(C(C(O1)OC2C(C(C(OC2OC3=CC(=C4C(=O)CC(OC4=C3)C5=CC=C(C=C5)O)O)CO)O)O)O)O)O	CP19A_HUMAN	5	4.02e-07	1	7.2931	11.033	CYP19A1	Aromatase
CC1C(C(C(C(O1)OC2C(C(C(OC2OC3=CC(=C4C(=O)CC(OC4=C3)C5=CC=C(C=C5)O)O)CO)O)O)O)O)O	CP1B1_HUMAN	5	1.01e-07	0.4507	1.6507	12.1067	CYP1B1	Cytochrome P450 1B1
CC1C(C(C(C(O1)OC2C(C(C(OC2OC3=CC(=C4C(=O)CC(OC4=C3)C5=CC=C(C=C5)O)O)CO)O)O)O)O)O	DCOR_HUMAN	5	8.33e-15	0.2887	0.5773	24.823	ODC1	Ornithine decarboxylase
CC1C(C(C(C(O1)OC2C(C(C(OC2OC3=CC(=C4C(=O)CC(OC4=C3)C5=CC=C(C=C5)O)O)CO)O)O)O)O)O	ERAP1_HUMAN	5	2.58e-06	0.3462	1.0385	9.5815	ERAP1	Endoplasmic reticulum aminopeptidase 1
CC1C(C(C(C(O1)OC2C(C(C(OC2OC3=CC(=C4C(=O)CC(OC4=C3)C5=CC=C(C=C5)O)O)CO)O)O)O)O)O	FGF1_HUMAN	5	1.09e-30	0.3867	1.0919	53.3419	FGF1	Fibroblast growth factor 1
CC1C(C(C(C(O1)OC2C(C(C(OC2OC3=CC(=C4C(=O)CC(OC4=C3)C5=CC=C(C=C5)O)O)CO)O)O)O)O)O	FGF2_HUMAN	5	9.26e-25	0.3867	1.0919	42.6972	FGF2	Fibroblast growth factor 2
CC1C(C(C(C(O1)OC2C(C(C(OC2OC3=CC(=C4C(=O)CC(OC4=C3)C5=CC=C(C=C5)O)O)CO)O)O)O)O)O	IL2_HUMAN	5	1.18e-30	0.3951	1.7748	53.2838	IL2	Interleukin-2
CC1C(C(C(C(O1)OC2C(C(C(OC2OC3=CC(=C4C(=O)CC(OC4=C3)C5=CC=C(C=C5)O)O)CO)O)O)O)O)O	IL6_HUMAN	5	3.12e-07	0.2805	0.2805	11.2306	IL6	Interleukin-6
CC1C(C(C(C(O1)OC2C(C(C(OC2OC3=CC(=C4C(=O)CC(OC4=C3)C5=CC=C(C=C5)O)O)CO)O)O)O)O)O	KLK2_HUMAN	5	2.9e-13	0.3256	0.3256	22.0599	KLK2	Kallikrein-2
CC1C(C(C(C(O1)OC2C(C(C(OC2OC3=CC(=C4C(=O)CC(OC4=C3)C5=CC=C(C=C5)O)O)CO)O)O)O)O)O	LEG3_HUMAN	5	9.73e-24	0.3158	2.6634	40.864	LGALS3	Galectin-3
CC1C(C(C(C(O1)OC2C(C(C(OC2OC3=CC(=C4C(=O)CC(OC4=C3)C5=CC=C(C=C5)O)O)CO)O)O)O)O)O	LEG4_HUMAN	5	2.44e-55	0.3158	0.9056	97.5956	LGALS4	Galectin-4
CC1C(C(C(C(O1)OC2C(C(C(OC2OC3=CC(=C4C(=O)CC(OC4=C3)C5=CC=C(C=C5)O)O)CO)O)O)O)O)O	LEG8_HUMAN	5	2.44e-55	0.3158	0.9056	97.5956	LGALS8	Galectin-8
CC1C(C(C(C(O1)OC2C(C(C(OC2OC3=CC(=C4C(=O)CC(OC4=C3)C5=CC=C(C=C5)O)O)CO)O)O)O)O)O	LEG9_HUMAN	5	5.37e-07	0.3103	0.3103	10.8068	LGALS9	Galectin-9
CC1C(C(C(C(O1)OC2C(C(C(OC2OC3=CC(=C4C(=O)CC(OC4=C3)C5=CC=C(C=C5)O)O)CO)O)O)O)O)O	NMUR2_HUMAN	5	2.98e-10	0.3226	0.3226	16.6518	NMUR2	Neuromedin-U receptor 2
CC1C(C(C(C(O1)OC2C(C(C(OC2OC3=CC(=C4C(=O)CC(OC4=C3)C5=CC=C(C=C5)O)O)CO)O)O)O)O)O	PDIA1_HUMAN	5	8.18e-33	0.4588	3.1388	57.1564	P4HB	Protein disulfide-isomerase
CC1C(C(C(C(O1)OC2C(C(C(OC2OC3=CC(=C4C(=O)CC(OC4=C3)C5=CC=C(C=C5)O)O)CO)O)O)O)O)O	RASH_HUMAN	5	7.72e-09	0.3678	0.6502	14.114	HRAS	GTPase HRas
CC1C(C(C(C(O1)OC2C(C(C(OC2OC3=CC(=C4C(=O)CC(OC4=C3)C5=CC=C(C=C5)O)O)CO)O)O)O)O)O	S28A3_HUMAN	5	5.13e-43	0.3415	0.3415	75.4737	SLC28A3	Solute carrier family 28 member 3
CC1C(C(C(C(O1)OC2C(C(C(OC2OC3=CC(=C4C(=O)CC(OC4=C3)C5=CC=C(C=C5)O)O)CO)O)O)O)O)O	SC5A1_HUMAN	5	7e-31	0.369	21.4182	53.6875	SLC5A1	Sodium/glucose cotransporter 1
CC1C(C(C(C(O1)OC2C(C(C(OC2OC3=CC(=C4C(=O)CC(OC4=C3)C5=CC=C(C=C5)O)O)CO)O)O)O)O)O	SC5A2_HUMAN	5	3.43e-35	0.369	29.2506	61.4259	SLC5A2	Sodium/glucose cotransporter 2
CC1C(C(C(C(O1)OC2C(C(C(OC2OC3=CC(=C4C(=O)CC(OC4=C3)C5=CC=C(C=C5)O)O)CO)O)O)O)O)O	SC5A4_HUMAN	5	1.55e-09	0.3537	0.6623	15.3642	SLC5A4	Solute carrier family 5 member 4
CC1C(C(C(C(O1)OC2C(C(C(OC2OC3=CC(=C4C(=O)CC(OC4=C3)C5=CC=C(C=C5)O)O)CO)O)O)O)O)O	T2R31_HUMAN	5	8.76e-66	0.5224	1.3028	116.349	TAS2R31	Taste receptor type 2 member 31
CC1C(C(C(C(O1)OC2C(C(C(OC2OC3=CC(=C4C(=O)CC(OC4=C3)C5=CC=C(C=C5)O)O)CO)O)O)O)O)O	TOP1_HUMAN	5	3.82e-13	0.3069	4.0044	21.8439	TOP1	DNA topoisomerase 1
CC1C(C(C(C(O1)OC2C(C(C(OC2OC3=CC(=C4C(=O)CC(OC4=C3)C5=CC=C(C=C5)O)O)CO)O)O)O)O)O	TYRO_HUMAN	5	8.91e-36	0.4474	3.6251	62.4758	TYR	Tyrosinase
CC1C(C(C(C(O1)OC2C(C(C(OC2OC3=CC(=C4C(=O)CC(OC4=C3)C5=CC=C(C=C5)O)O)CO)O)O)O)O)O	UBE2N_HUMAN	5	0.0001741	1	1	6.2989	UBE2N	Ubiquitin-conjugating enzyme E2 N
CC1C(C(C(C(O1)OC2C(C(C(OC2OC3=CC(=C4C(=O)CC(OC4=C3)C5=CC=C(C=C5)O)O)CO)O)O)O)O)O	VEGFA_HUMAN	5	4.57e-18	0.3867	1.0919	30.6804	VEGFA	Vascular endothelial growth factor A
CC1C(C(C(C(O1)OC2C(C(C(OC2OC3=CC(=C4C(=O)CC(OC4=C3)C5=CC=C(C=C5)O)O)CO)O)O)O)O)O	XDH_HUMAN	5	7.03e-06	0.4026	1.1908	8.8015	XDH	Xanthine dehydrogenase/oxidase
CC1C(C(C(C(O1)OC2C(C(C(OC2OC3=CC(=C4C(=O)CC(OC4=C3)C5=CC(=C(C=C5)OC)O)O)CO)O)O)O)O)O	AL1A2_HUMAN	5	1.119e-10	0.3371	0.3371	17.4156	ALDH1A2	Retinal dehydrogenase 2
CC1C(C(C(C(O1)OC2C(C(C(OC2OC3=CC(=C4C(=O)CC(OC4=C3)C5=CC(=C(C=C5)OC)O)O)CO)O)O)O)O)O	AL1B1_HUMAN	5	1.776e-11	0.3371	0.3371	18.8505	ALDH1B1	Aldehyde dehydrogenase X, mitochondrial
CC1C(C(C(C(O1)OC2C(C(C(OC2OC3=CC(=C4C(=O)CC(OC4=C3)C5=CC(=C(C=C5)OC)O)O)CO)O)O)O)O)O	AMY1A_HUMAN	5	2.911e-30	0.2967	0.5903	52.5763	AMY1A	Alpha-amylase 1
CC1C(C(C(C(O1)OC2C(C(C(OC2OC3=CC(=C4C(=O)CC(OC4=C3)C5=CC(=C(C=C5)OC)O)O)CO)O)O)O)O)O	AMYP_HUMAN	5	4.389e-56	0.3333	0.918	98.9345	AMY2A	Pancreatic alpha-amylase
CC1C(C(C(C(O1)OC2C(C(C(OC2OC3=CC(=C4C(=O)CC(OC4=C3)C5=CC(=C(C=C5)OC)O)O)CO)O)O)O)O)O	CAH13_HUMAN	5	6.948e-07	0.3765	1.644	10.6058	CA13	Carbonic anhydrase 13
CC1C(C(C(C(O1)OC2C(C(C(OC2OC3=CC(=C4C(=O)CC(OC4=C3)C5=CC(=C(C=C5)OC)O)O)CO)O)O)O)O)O	CAH14_HUMAN	5	5.627e-07	0.3093	3.2519	10.7702	CA14	Carbonic anhydrase 14
CC1C(C(C(C(O1)OC2C(C(C(OC2OC3=CC(=C4C(=O)CC(OC4=C3)C5=CC(=C(C=C5)OC)O)O)CO)O)O)O)O)O	CAH12_HUMAN	5	1.087e-08	0.5417	12.0845	13.8476	CA12	Carbonic anhydrase 12
CC1C(C(C(C(O1)OC2C(C(C(OC2OC3=CC(=C4C(=O)CC(OC4=C3)C5=CC(=C(C=C5)OC)O)O)CO)O)O)O)O)O	CAH9_HUMAN	5	6.6e-07	0.3765	11.2014	10.6459	CA9	Carbonic anhydrase 9
CC1C(C(C(C(O1)OC2C(C(C(OC2OC3=CC(=C4C(=O)CC(OC4=C3)C5=CC(=C(C=C5)OC)O)O)CO)O)O)O)O)O	CD22_HUMAN	5	4.711e-19	0.2946	1.154	32.4526	CD22	B-cell receptor CD22
CC1C(C(C(C(O1)OC2C(C(C(OC2OC3=CC(=C4C(=O)CC(OC4=C3)C5=CC(=C(C=C5)OC)O)O)CO)O)O)O)O)O	CP19A_HUMAN	5	9.544e-06	0.8333	5.9168	8.563	CYP19A1	Aromatase
CC1C(C(C(C(O1)OC2C(C(C(OC2OC3=CC(=C4C(=O)CC(OC4=C3)C5=CC(=C(C=C5)OC)O)O)CO)O)O)O)O)O	CP1B1_HUMAN	5	2.545e-08	0.5417	1.7871	13.1842	CYP1B1	Cytochrome P450 1B1
CC1C(C(C(C(O1)OC2C(C(C(OC2OC3=CC(=C4C(=O)CC(OC4=C3)C5=CC(=C(C=C5)OC)O)O)CO)O)O)O)O)O	DCOR_HUMAN	5	5.425e-34	0.3936	1.3665	59.2723	ODC1	Ornithine decarboxylase
CC1C(C(C(C(O1)OC2C(C(C(OC2OC3=CC(=C4C(=O)CC(OC4=C3)C5=CC(=C(C=C5)OC)O)O)CO)O)O)O)O)O	ERAP1_HUMAN	5	1.935e-06	0.3537	1.061	9.8072	ERAP1	Endoplasmic reticulum aminopeptidase 1
CC1C(C(C(C(O1)OC2C(C(C(OC2OC3=CC(=C4C(=O)CC(OC4=C3)C5=CC(=C(C=C5)OC)O)O)CO)O)O)O)O)O	FGF1_HUMAN	5	1.525e-28	0.358	1.0136	49.4901	FGF1	Fibroblast growth factor 1
CC1C(C(C(C(O1)OC2C(C(C(OC2OC3=CC(=C4C(=O)CC(OC4=C3)C5=CC(=C(C=C5)OC)O)O)CO)O)O)O)O)O	FGF2_HUMAN	5	4.884e-23	0.358	1.0136	39.6057	FGF2	Fibroblast growth factor 2
CC1C(C(C(C(O1)OC2C(C(C(OC2OC3=CC(=C4C(=O)CC(OC4=C3)C5=CC(=C(C=C5)OC)O)O)CO)O)O)O)O)O	IL2_HUMAN	5	1.29e-25	0.427	1.476	44.2343	IL2	Interleukin-2
CC1C(C(C(C(O1)OC2C(C(C(OC2OC3=CC(=C4C(=O)CC(OC4=C3)C5=CC(=C(C=C5)OC)O)O)CO)O)O)O)O)O	IL6_HUMAN	5	1.812e-07	0.2907	0.2907	11.6535	IL6	Interleukin-6
CC1C(C(C(C(O1)OC2C(C(C(OC2OC3=CC(=C4C(=O)CC(OC4=C3)C5=CC(=C(C=C5)OC)O)O)CO)O)O)O)O)O	KLK2_HUMAN	5	1.88e-12	0.3043	0.3043	20.6017	KLK2	Kallikrein-2
CC1C(C(C(C(O1)OC2C(C(C(OC2OC3=CC(=C4C(=O)CC(OC4=C3)C5=CC(=C(C=C5)OC)O)O)CO)O)O)O)O)O	LEG3_HUMAN	5	9.992e-16	0.3043	1.7385	26.4462	LGALS3	Galectin-3
CC1C(C(C(C(O1)OC2C(C(C(OC2OC3=CC(=C4C(=O)CC(OC4=C3)C5=CC(=C(C=C5)OC)O)O)CO)O)O)O)O)O	LEG4_HUMAN	5	1.195e-35	0.2927	0.5784	62.2471	LGALS4	Galectin-4
CC1C(C(C(C(O1)OC2C(C(C(OC2OC3=CC(=C4C(=O)CC(OC4=C3)C5=CC(=C(C=C5)OC)O)O)CO)O)O)O)O)O	LEG8_HUMAN	5	1.195e-35	0.2927	0.5784	62.2471	LGALS8	Galectin-8
CC1C(C(C(C(O1)OC2C(C(C(OC2OC3=CC(=C4C(=O)CC(OC4=C3)C5=CC(=C(C=C5)OC)O)O)CO)O)O)O)O)O	LEG9_HUMAN	5	7.091e-07	0.3043	0.3043	10.5899	LGALS9	Galectin-9
CC1C(C(C(C(O1)OC2C(C(C(OC2OC3=CC(=C4C(=O)CC(OC4=C3)C5=CC(=C(C=C5)OC)O)O)CO)O)O)O)O)O	NMUR2_HUMAN	5	1.117e-09	0.303	0.303	15.6218	NMUR2	Neuromedin-U receptor 2
CC1C(C(C(C(O1)OC2C(C(C(OC2OC3=CC(=C4C(=O)CC(OC4=C3)C5=CC(=C(C=C5)OC)O)O)CO)O)O)O)O)O	PDIA1_HUMAN	5	9.52e-25	0.3978	2.3518	42.6759	P4HB	Protein disulfide-isomerase
CC1C(C(C(C(O1)OC2C(C(C(OC2OC3=CC(=C4C(=O)CC(OC4=C3)C5=CC(=C(C=C5)OC)O)O)CO)O)O)O)O)O	S28A3_HUMAN	5	2.569e-38	0.3034	0.3034	67.0363	SLC28A3	Solute carrier family 28 member 3
CC1C(C(C(C(O1)OC2C(C(C(OC2OC3=CC(=C4C(=O)CC(OC4=C3)C5=CC(=C(C=C5)OC)O)O)CO)O)O)O)O)O	SC5A1_HUMAN	5	5.329e-15	0.3596	10.3885	25.1677	SLC5A1	Sodium/glucose cotransporter 1
CC1C(C(C(C(O1)OC2C(C(C(OC2OC3=CC(=C4C(=O)CC(OC4=C3)C5=CC(=C(C=C5)OC)O)O)CO)O)O)O)O)O	SC5A2_HUMAN	5	8.329e-19	0.3333	15.6544	32.0082	SLC5A2	Sodium/glucose cotransporter 2
CC1C(C(C(C(O1)OC2C(C(C(OC2OC3=CC(=C4C(=O)CC(OC4=C3)C5=CC(=C(C=C5)OC)O)O)CO)O)O)O)O)O	SC5A4_HUMAN	5	2.417e-09	0.3333	0.6479	15.0198	SLC5A4	Solute carrier family 5 member 4
CC1C(C(C(C(O1)OC2C(C(C(OC2OC3=CC(=C4C(=O)CC(OC4=C3)C5=CC(=C(C=C5)OC)O)O)CO)O)O)O)O)O	T2R31_HUMAN	5	1.468e-65	0.4595	1.2983	115.946	TAS2R31	Taste receptor type 2 member 31
CC1C(C(C(C(O1)OC2C(C(C(OC2OC3=CC(=C4C(=O)CC(OC4=C3)C5=CC(=C(C=C5)OC)O)O)CO)O)O)O)O)O	TYRO_HUMAN	5	7.002e-32	0.3976	3.2233	55.4826	TYR	Tyrosinase
CC1C(C(C(C(O1)OC2C(C(C(OC2OC3=CC(=C4C(=O)CC(OC4=C3)C5=CC(=C(C=C5)OC)O)O)CO)O)O)O)O)O	VEGFA_HUMAN	5	1.11e-16	0.358	1.0136	28.4456	VEGFA	Vascular endothelial growth factor A
CC1C(C(C(C(O1)OC2C(C(C(OC2OC3=CC(=C4C(=O)CC(OC4=C3)C5=CC(=C(C=C5)OC)O)O)CO)O)O)O)O)O	XDH_HUMAN	5	1.059e-06	0.3736	1.3716	10.2771	XDH	Xanthine dehydrogenase/oxidase
CC1C(C(C(C(O1)OC2C(C(C(OC2OC3=CC(=C4C(=O)CC(OC4=C3)C5=CC=C(C=C5)OC)O)CO)O)O)O)O)O	AL1A2_HUMAN	5	1.73e-11	0.3647	0.3647	18.8711	ALDH1A2	Retinal dehydrogenase 2
CC1C(C(C(C(O1)OC2C(C(C(OC2OC3=CC(=C4C(=O)CC(OC4=C3)C5=CC=C(C=C5)OC)O)CO)O)O)O)O)O	AL1B1_HUMAN	5	2.366e-12	0.3647	0.3647	20.4224	ALDH1B1	Aldehyde dehydrogenase X, mitochondrial
CC1C(C(C(C(O1)OC2C(C(C(OC2OC3=CC(=C4C(=O)CC(OC4=C3)C5=CC=C(C=C5)OC)O)CO)O)O)O)O)O	AMY1A_HUMAN	5	3.512e-31	0.3068	0.6087	54.2254	AMY1A	Alpha-amylase 1
CC1C(C(C(C(O1)OC2C(C(C(OC2OC3=CC(=C4C(=O)CC(OC4=C3)C5=CC=C(C=C5)OC)O)CO)O)O)O)O)O	AMYP_HUMAN	5	6.174e-58	0.3448	0.9488	102.259	AMY2A	Pancreatic alpha-amylase
CC1C(C(C(C(O1)OC2C(C(C(OC2OC3=CC(=C4C(=O)CC(OC4=C3)C5=CC=C(C=C5)OC)O)CO)O)O)O)O)O	CAH13_HUMAN	5	7.201e-07	0.3735	1.64	10.5779	CA13	Carbonic anhydrase 13
CC1C(C(C(C(O1)OC2C(C(C(OC2OC3=CC(=C4C(=O)CC(OC4=C3)C5=CC=C(C=C5)OC)O)CO)O)O)O)O)O	CAH14_HUMAN	5	3.408e-07	0.3191	3.3564	11.1612	CA14	Carbonic anhydrase 14
CC1C(C(C(C(O1)OC2C(C(C(OC2OC3=CC(=C4C(=O)CC(OC4=C3)C5=CC=C(C=C5)OC)O)CO)O)O)O)O)O	CAH12_HUMAN	5	3.744e-09	0.4211	12.7026	14.6785	CA12	Carbonic anhydrase 12
CC1C(C(C(C(O1)OC2C(C(C(OC2OC3=CC(=C4C(=O)CC(OC4=C3)C5=CC=C(C=C5)OC)O)CO)O)O)O)O)O	CAH9_HUMAN	5	3.256e-07	0.3735	11.6684	11.1968	CA9	Carbonic anhydrase 9
CC1C(C(C(C(O1)OC2C(C(C(OC2OC3=CC(=C4C(=O)CC(OC4=C3)C5=CC=C(C=C5)OC)O)CO)O)O)O)O)O	CBS_HUMAN	5	1.788e-12	0.3375	0.3375	20.6407	CBS	Cystathionine beta-synthase
CC1C(C(C(C(O1)OC2C(C(C(OC2OC3=CC(=C4C(=O)CC(OC4=C3)C5=CC=C(C=C5)OC)O)CO)O)O)O)O)O	CD22_HUMAN	5	4.5e-95	0.3396	5.9373	168.932	CD22	B-cell receptor CD22
CC1C(C(C(C(O1)OC2C(C(C(OC2OC3=CC(=C4C(=O)CC(OC4=C3)C5=CC=C(C=C5)OC)O)CO)O)O)O)O)O	CP19A_HUMAN	5	1.192e-06	0.8971	6.8206	10.1851	CYP19A1	Aromatase
CC1C(C(C(C(O1)OC2C(C(C(OC2OC3=CC(=C4C(=O)CC(OC4=C3)C5=CC=C(C=C5)OC)O)CO)O)O)O)O)O	CP1B1_HUMAN	5	3.284e-08	0.5362	1.7619	12.9854	CYP1B1	Cytochrome P450 1B1
CC1C(C(C(C(O1)OC2C(C(C(OC2OC3=CC(=C4C(=O)CC(OC4=C3)C5=CC=C(C=C5)OC)O)CO)O)O)O)O)O	DCOR_HUMAN	5	7.556e-23	0.3061	0.9082	39.2654	ODC1	Ornithine decarboxylase
CC1C(C(C(C(O1)OC2C(C(C(OC2OC3=CC(=C4C(=O)CC(OC4=C3)C5=CC=C(C=C5)OC)O)CO)O)O)O)O)O	ERAP1_HUMAN	5	2.228e-06	0.35	1.05	9.6972	ERAP1	Endoplasmic reticulum aminopeptidase 1
CC1C(C(C(C(O1)OC2C(C(C(OC2OC3=CC(=C4C(=O)CC(OC4=C3)C5=CC=C(C=C5)OC)O)CO)O)O)O)O)O	FGF2_HUMAN	5	7.243e-24	0.3718	1.0513	41.0938	FGF2	Fibroblast growth factor 2
CC1C(C(C(C(O1)OC2C(C(C(OC2OC3=CC(=C4C(=O)CC(OC4=C3)C5=CC=C(C=C5)OC)O)CO)O)O)O)O)O	FGF1_HUMAN	5	1.414e-29	0.3718	1.0513	51.3442	FGF1	Fibroblast growth factor 1
CC1C(C(C(C(O1)OC2C(C(C(OC2OC3=CC(=C4C(=O)CC(OC4=C3)C5=CC=C(C=C5)OC)O)CO)O)O)O)O)O	IL2_HUMAN	5	2.818e-31	0.4096	1.8116	54.3971	IL2	Interleukin-2
CC1C(C(C(C(O1)OC2C(C(C(OC2OC3=CC(=C4C(=O)CC(OC4=C3)C5=CC=C(C=C5)OC)O)CO)O)O)O)O)O	IL6_HUMAN	5	1.037e-07	0.3012	0.3012	12.0888	IL6	Interleukin-6
CC1C(C(C(C(O1)OC2C(C(C(OC2OC3=CC(=C4C(=O)CC(OC4=C3)C5=CC=C(C=C5)OC)O)CO)O)O)O)O)O	KLK2_HUMAN	5	9.7e-12	0.2857	0.2857	19.3222	KLK2	Kallikrein-2
CC1C(C(C(C(O1)OC2C(C(C(OC2OC3=CC(=C4C(=O)CC(OC4=C3)C5=CC=C(C=C5)OC)O)CO)O)O)O)O)O	LEG4_HUMAN	5	6.646e-37	0.3038	0.5993	64.4999	LGALS4	Galectin-4
CC1C(C(C(C(O1)OC2C(C(C(OC2OC3=CC(=C4C(=O)CC(OC4=C3)C5=CC=C(C=C5)OC)O)CO)O)O)O)O)O	LEG3_HUMAN	5	3.887e-24	0.3295	2.7093	41.5791	LGALS3	Galectin-3
CC1C(C(C(C(O1)OC2C(C(C(OC2OC3=CC(=C4C(=O)CC(OC4=C3)C5=CC=C(C=C5)OC)O)CO)O)O)O)O)O	LEG7_HUMAN	5	1.121e-07	0.2842	0.2842	12.0278	LGALS7; LGALS7B	Galectin-7
CC1C(C(C(C(O1)OC2C(C(C(OC2OC3=CC(=C4C(=O)CC(OC4=C3)C5=CC=C(C=C5)OC)O)CO)O)O)O)O)O	LEG8_HUMAN	5	6.646e-37	0.3038	0.5993	64.4999	LGALS8	Galectin-8
CC1C(C(C(C(O1)OC2C(C(C(OC2OC3=CC(=C4C(=O)CC(OC4=C3)C5=CC=C(C=C5)OC)O)CO)O)O)O)O)O	LEG9_HUMAN	5	2.203e-07	0.3295	0.3295	11.5013	LGALS9	Galectin-9
CC1C(C(C(C(O1)OC2C(C(C(OC2OC3=CC(=C4C(=O)CC(OC4=C3)C5=CC=C(C=C5)OC)O)CO)O)O)O)O)O	NMUR2_HUMAN	5	5.888e-10	0.3125	0.3125	16.1207	NMUR2	Neuromedin-U receptor 2
CC1C(C(C(C(O1)OC2C(C(C(OC2OC3=CC(=C4C(=O)CC(OC4=C3)C5=CC=C(C=C5)OC)O)CO)O)O)O)O)O	PDIA1_HUMAN	5	4.339e-31	0.4111	2.9705	54.0605	P4HB	Protein disulfide-isomerase
CC1C(C(C(C(O1)OC2C(C(C(OC2OC3=CC(=C4C(=O)CC(OC4=C3)C5=CC=C(C=C5)OC)O)CO)O)O)O)O)O	S28A3_HUMAN	5	1.271e-39	0.314	0.314	69.3803	SLC28A3	Solute carrier family 28 member 3
CC1C(C(C(C(O1)OC2C(C(C(OC2OC3=CC(=C4C(=O)CC(OC4=C3)C5=CC=C(C=C5)OC)O)CO)O)O)O)O)O	SC5A1_HUMAN	5	9.658e-31	0.4048	21.3211	53.4367	SLC5A1	Sodium/glucose cotransporter 1
CC1C(C(C(C(O1)OC2C(C(C(OC2OC3=CC(=C4C(=O)CC(OC4=C3)C5=CC=C(C=C5)OC)O)CO)O)O)O)O)O	SC5A2_HUMAN	5	2.332e-47	0.3797	39.3464	83.2696	SLC5A2	Sodium/glucose cotransporter 2
CC1C(C(C(C(O1)OC2C(C(C(OC2OC3=CC(=C4C(=O)CC(OC4=C3)C5=CC=C(C=C5)OC)O)CO)O)O)O)O)O	SC5A4_HUMAN	5	5.138e-18	0.3797	1.2971	30.5896	SLC5A4	Solute carrier family 5 member 4
CC1C(C(C(C(O1)OC2C(C(C(OC2OC3=CC(=C4C(=O)CC(OC4=C3)C5=CC=C(C=C5)OC)O)CO)O)O)O)O)O	SC5AB_HUMAN	5	3.817e-23	0.2841	0.2841	39.7978	SLC5A11	Sodium/myo-inositol cotransporter 2
CC1C(C(C(C(O1)OC2C(C(C(OC2OC3=CC(=C4C(=O)CC(OC4=C3)C5=CC=C(C=C5)OC)O)CO)O)O)O)O)O	T2R31_HUMAN	5	6.549e-66	0.5217	1.3053	116.576	TAS2R31	Taste receptor type 2 member 31
CC1C(C(C(C(O1)OC2C(C(C(OC2OC3=CC(=C4C(=O)CC(OC4=C3)C5=CC=C(C=C5)OC)O)CO)O)O)O)O)O	TYRO_HUMAN	5	1.555e-33	0.4304	3.3939	58.451	TYR	Tyrosinase
CC1C(C(C(C(O1)OC2C(C(C(OC2OC3=CC(=C4C(=O)CC(OC4=C3)C5=CC=C(C=C5)OC)O)CO)O)O)O)O)O	VEGFA_HUMAN	5	2.022e-17	0.3718	1.0513	29.5213	VEGFA	Vascular endothelial growth factor A
COC(=O)C1=CO[C@@H]([C@@H]2[C@H]1C=C[C@]2(CO)O)O[C@H]3[C@@H]([C@H]([C@@H]([C@H](O3)CO)O)O)O	AMYP_HUMAN	5	2.322e-19	0.3077	0.3077	33.0041	AMY2A	Pancreatic alpha-amylase
COC(=O)C1=CO[C@@H]([C@@H]2[C@H]1C=C[C@]2(CO)O)O[C@H]3[C@@H]([C@H]([C@@H]([C@H](O3)CO)O)O)O	B4GT1_HUMAN	5	6.229e-18	0.284	0.284	30.4394	B4GALT1	Beta-1,4-galactosyltransferase 1
COC(=O)C1=CO[C@@H]([C@@H]2[C@H]1C=C[C@]2(CO)O)O[C@H]3[C@@H]([C@H]([C@@H]([C@H](O3)CO)O)O)O	CAH13_HUMAN	5	1.468e-06	0.3429	1.5614	10.0227	CA13	Carbonic anhydrase 13
COC(=O)C1=CO[C@@H]([C@@H]2[C@H]1C=C[C@]2(CO)O)O[C@H]3[C@@H]([C@H]([C@@H]([C@H](O3)CO)O)O)O	CAH12_HUMAN	5	3.499e-10	0.3429	14.0774	16.5265	CA12	Carbonic anhydrase 12
COC(=O)C1=CO[C@@H]([C@@H]2[C@H]1C=C[C@]2(CO)O)O[C@H]3[C@@H]([C@H]([C@@H]([C@H](O3)CO)O)O)O	CAH14_HUMAN	5	2.348e-12	0.3412	5.8339	20.4281	CA14	Carbonic anhydrase 14
COC(=O)C1=CO[C@@H]([C@@H]2[C@H]1C=C[C@]2(CO)O)O[C@H]3[C@@H]([C@H]([C@@H]([C@H](O3)CO)O)O)O	CAH1_HUMAN	5	3.454e-07	0.3429	14.4101	11.1507	CA1	Carbonic anhydrase 1
COC(=O)C1=CO[C@@H]([C@@H]2[C@H]1C=C[C@]2(CO)O)O[C@H]3[C@@H]([C@H]([C@@H]([C@H](O3)CO)O)O)O	CAH9_HUMAN	5	1.891e-09	0.3429	15.0713	15.2112	CA9	Carbonic anhydrase 9
COC(=O)C1=CO[C@@H]([C@@H]2[C@H]1C=C[C@]2(CO)O)O[C@H]3[C@@H]([C@H]([C@@H]([C@H](O3)CO)O)O)O	CD69_HUMAN	5	1.15e-11	0.2838	0.2838	19.1896	CD69	Early activation antigen CD69
COC(=O)C1=CO[C@@H]([C@@H]2[C@H]1C=C[C@]2(CO)O)O[C@H]3[C@@H]([C@H]([C@@H]([C@H](O3)CO)O)O)O	CXB2_HUMAN	5	1.195e-36	0.2899	0.2899	64.0425	GJB2	Gap junction beta-2 protein
COC(=O)C1=CO[C@@H]([C@@H]2[C@H]1C=C[C@]2(CO)O)O[C@H]3[C@@H]([C@H]([C@@H]([C@H](O3)CO)O)O)O	FGF1_HUMAN	5	1.324e-36	0.3649	1.3079	63.9625	FGF1	Fibroblast growth factor 1
COC(=O)C1=CO[C@@H]([C@@H]2[C@H]1C=C[C@]2(CO)O)O[C@H]3[C@@H]([C@H]([C@@H]([C@H](O3)CO)O)O)O	FGF2_HUMAN	5	3.164e-23	0.3649	1.0222	39.9441	FGF2	Fibroblast growth factor 2
COC(=O)C1=CO[C@@H]([C@@H]2[C@H]1C=C[C@]2(CO)O)O[C@H]3[C@@H]([C@H]([C@@H]([C@H](O3)CO)O)O)O	IL2_HUMAN	5	1.546e-17	0.407	0.997	29.7306	IL2	Interleukin-2
COC(=O)C1=CO[C@@H]([C@@H]2[C@H]1C=C[C@]2(CO)O)O[C@H]3[C@@H]([C@H]([C@@H]([C@H](O3)CO)O)O)O	LEG3_HUMAN	5	1.766e-48	0.3784	5.5129	85.2818	LGALS3	Galectin-3
COC(=O)C1=CO[C@@H]([C@@H]2[C@H]1C=C[C@]2(CO)O)O[C@H]3[C@@H]([C@H]([C@@H]([C@H](O3)CO)O)O)O	LEG4_HUMAN	5	1.353e-55	0.32	0.9099	98.0569	LGALS4	Galectin-4
COC(=O)C1=CO[C@@H]([C@@H]2[C@H]1C=C[C@]2(CO)O)O[C@H]3[C@@H]([C@H]([C@@H]([C@H](O3)CO)O)O)O	LEG7_HUMAN	5	2.331e-15	0.3049	0.5997	25.8022	LGALS7; LGALS7B	Galectin-7
COC(=O)C1=CO[C@@H]([C@@H]2[C@H]1C=C[C@]2(CO)O)O[C@H]3[C@@H]([C@H]([C@@H]([C@H](O3)CO)O)O)O	LEG8_HUMAN	5	1.353e-55	0.32	0.9099	98.0569	LGALS8	Galectin-8
COC(=O)C1=CO[C@@H]([C@@H]2[C@H]1C=C[C@]2(CO)O)O[C@H]3[C@@H]([C@H]([C@@H]([C@H](O3)CO)O)O)O	LEG9_HUMAN	5	3.789e-20	0.3784	0.9631	34.4176	LGALS9	Galectin-9
COC(=O)C1=CO[C@@H]([C@@H]2[C@H]1C=C[C@]2(CO)O)O[C@H]3[C@@H]([C@H]([C@@H]([C@H](O3)CO)O)O)O	LYAM1_HUMAN	5	1.132e-17	0.3289	1.1861	29.9735	SELL	L-selectin
COC(=O)C1=CO[C@@H]([C@@H]2[C@H]1C=C[C@]2(CO)O)O[C@H]3[C@@H]([C@H]([C@@H]([C@H](O3)CO)O)O)O	LYAM3_HUMAN	5	5.349e-12	0.3289	1.4718	19.7863	SELP	P-selectin
COC(=O)C1=CO[C@@H]([C@@H]2[C@H]1C=C[C@]2(CO)O)O[C@H]3[C@@H]([C@H]([C@@H]([C@H](O3)CO)O)O)O	MAG_HUMAN	5	1.177e-14	0.2887	0.5713	24.5589	MAG	Myelin-associated glycoprotein
COC(=O)C1=CO[C@@H]([C@@H]2[C@H]1C=C[C@]2(CO)O)O[C@H]3[C@@H]([C@H]([C@@H]([C@H](O3)CO)O)O)O	MGA_HUMAN	5	1.374e-06	0.3188	0.9194	10.0742	MGAM	Maltase-glucoamylase, intestinal
COC(=O)C1=CO[C@@H]([C@@H]2[C@H]1C=C[C@]2(CO)O)O[C@H]3[C@@H]([C@H]([C@@H]([C@H](O3)CO)O)O)O	P2RY4_HUMAN	5	9.027e-06	0.2892	1.1566	8.6063	P2RY4	P2Y purinoceptor 4
COC(=O)C1=CO[C@@H]([C@@H]2[C@H]1C=C[C@]2(CO)O)O[C@H]3[C@@H]([C@H]([C@@H]([C@H](O3)CO)O)O)O	P2RY6_HUMAN	5	2.835e-07	0.3176	1.4778	11.3048	P2RY6	P2Y purinoceptor 6
COC(=O)C1=CO[C@@H]([C@@H]2[C@H]1C=C[C@]2(CO)O)O[C@H]3[C@@H]([C@H]([C@@H]([C@H](O3)CO)O)O)O	P2Y14_HUMAN	5	2.772e-19	0.2927	2.0261	32.8662	P2RY14	P2Y purinoceptor 14
COC(=O)C1=CO[C@@H]([C@@H]2[C@H]1C=C[C@]2(CO)O)O[C@H]3[C@@H]([C@H]([C@@H]([C@H](O3)CO)O)O)O	PDIA1_HUMAN	5	1.17e-09	0.3038	0.8796	15.5855	P4HB	Protein disulfide-isomerase
COC(=O)C1=CO[C@@H]([C@@H]2[C@H]1C=C[C@]2(CO)O)O[C@H]3[C@@H]([C@H]([C@@H]([C@H](O3)CO)O)O)O	S28A3_HUMAN	5	1.332e-36	0.2895	0.2895	63.9581	SLC28A3	Solute carrier family 28 member 3
COC(=O)C1=CO[C@@H]([C@@H]2[C@H]1C=C[C@]2(CO)O)O[C@H]3[C@@H]([C@H]([C@@H]([C@H](O3)CO)O)O)O	SC5A1_HUMAN	5	4.04e-22	0.3291	15.3351	37.9583	SLC5A1	Sodium/glucose cotransporter 1
COC(=O)C1=CO[C@@H]([C@@H]2[C@H]1C=C[C@]2(CO)O)O[C@H]3[C@@H]([C@H]([C@@H]([C@H](O3)CO)O)O)O	SC5A2_HUMAN	5	1.242e-26	0.3291	22.1485	46.0594	SLC5A2	Sodium/glucose cotransporter 2
COC(=O)C1=CO[C@@H]([C@@H]2[C@H]1C=C[C@]2(CO)O)O[C@H]3[C@@H]([C@H]([C@@H]([C@H](O3)CO)O)O)O	SC5A4_HUMAN	5	4.663e-09	0.3239	0.6266	14.5074	SLC5A4	Solute carrier family 5 member 4
COC(=O)C1=CO[C@@H]([C@@H]2[C@H]1C=C[C@]2(CO)O)O[C@H]3[C@@H]([C@H]([C@@H]([C@H](O3)CO)O)O)O	SUIS_HUMAN	5	2.815e-12	0.3188	1.2011	20.2868	SI	Sucrase-isomaltase, intestinal
COC(=O)C1=CO[C@@H]([C@@H]2[C@H]1C=C[C@]2(CO)O)O[C@H]3[C@@H]([C@H]([C@@H]([C@H](O3)CO)O)O)O	TF_HUMAN	5	7.794e-07	0.3182	2.6542	10.5162	F3	Tissue factor
COC(=O)C1=CO[C@@H]([C@@H]2[C@H]1C=C[C@]2(CO)O)O[C@H]3[C@@H]([C@H]([C@@H]([C@H](O3)CO)O)O)O	TYRO_HUMAN	5	2.913e-27	0.3077	2.7468	47.19	TYR	Tyrosinase
COC(=O)C1=CO[C@@H]([C@@H]2[C@H]1C=C[C@]2(CO)O)O[C@H]3[C@@H]([C@H]([C@@H]([C@H](O3)CO)O)O)O	VEGFA_HUMAN	5	1.11e-16	0.3649	1.0222	28.6902	VEGFA	Vascular endothelial growth factor A
COC(=O)C1=COC(C2C1CC=C2CO)OC3C(C(C(C(O3)COC4C(C(C(C(O4)CO)O)O)O)O)O)O	AMY1A_HUMAN	5	9.879e-34	0.3474	0.6599	58.8049	AMY1A	Alpha-amylase 1
COC(=O)C1=COC(C2C1CC=C2CO)OC3C(C(C(C(O3)COC4C(C(C(C(O4)CO)O)O)O)O)O)O	AMYP_HUMAN	5	4.61e-62	0.4125	1.0174	109.668	AMY2A	Pancreatic alpha-amylase
COC(=O)C1=COC(C2C1CC=C2CO)OC3C(C(C(C(O3)COC4C(C(C(C(O4)CO)O)O)O)O)O)O	BIP_HUMAN	5	5.941e-08	0.3117	0.3117	12.5231	HSPA5	Endoplasmic reticulum chaperone BiP
COC(=O)C1=COC(C2C1CC=C2CO)OC3C(C(C(C(O3)COC4C(C(C(C(O4)CO)O)O)O)O)O)O	CAH14_HUMAN	5	1.073e-06	0.3293	3.1173	10.2669	CA14	Carbonic anhydrase 14
COC(=O)C1=COC(C2C1CC=C2CO)OC3C(C(C(C(O3)COC4C(C(C(C(O4)CO)O)O)O)O)O)O	CAH9_HUMAN	5	8.462e-06	0.3718	9.5153	8.6568	CA9	Carbonic anhydrase 9
COC(=O)C1=COC(C2C1CC=C2CO)OC3C(C(C(C(O3)COC4C(C(C(C(O4)CO)O)O)O)O)O)O	CD69_HUMAN	5	2.998e-14	0.3514	0.3514	23.8295	CD69	Early activation antigen CD69
COC(=O)C1=COC(C2C1CC=C2CO)OC3C(C(C(C(O3)COC4C(C(C(C(O4)CO)O)O)O)O)O)O	CXB2_HUMAN	5	1.381e-38	0.3056	0.3056	67.5202	GJB2	Gap junction beta-2 protein
COC(=O)C1=COC(C2C1CC=C2CO)OC3C(C(C(C(O3)COC4C(C(C(C(O4)CO)O)O)O)O)O)O	FGF1_HUMAN	5	2.108e-28	0.3472	1.0084	49.2372	FGF1	Fibroblast growth factor 1
COC(=O)C1=COC(C2C1CC=C2CO)OC3C(C(C(C(O3)COC4C(C(C(C(O4)CO)O)O)O)O)O)O	FGF2_HUMAN	5	6.336e-23	0.3472	1.0084	39.4028	FGF2	Fibroblast growth factor 2
COC(=O)C1=COC(C2C1CC=C2CO)OC3C(C(C(C(O3)COC4C(C(C(C(O4)CO)O)O)O)O)O)O	IL2_HUMAN	5	4.724e-13	0.4483	0.7311	21.6784	IL2	Interleukin-2
COC(=O)C1=COC(C2C1CC=C2CO)OC3C(C(C(C(O3)COC4C(C(C(C(O4)CO)O)O)O)O)O)O	LEG3_HUMAN	5	1.576e-30	0.3718	3.4455	53.0546	LGALS3	Galectin-3
COC(=O)C1=COC(C2C1CC=C2CO)OC3C(C(C(C(O3)COC4C(C(C(C(O4)CO)O)O)O)O)O)O	LEG4_HUMAN	5	2.244e-59	0.3333	0.9727	104.843	LGALS4	Galectin-4
COC(=O)C1=COC(C2C1CC=C2CO)OC3C(C(C(C(O3)COC4C(C(C(C(O4)CO)O)O)O)O)O)O	LEG7_HUMAN	5	4.067e-08	0.3023	0.3023	12.8186	LGALS7; LGALS7B	Galectin-7
COC(=O)C1=COC(C2C1CC=C2CO)OC3C(C(C(C(O3)COC4C(C(C(C(O4)CO)O)O)O)O)O)O	LEG8_HUMAN	5	2.244e-59	0.3333	0.9727	104.843	LGALS8	Galectin-8
COC(=O)C1=COC(C2C1CC=C2CO)OC3C(C(C(C(O3)COC4C(C(C(C(O4)CO)O)O)O)O)O)O	LEG9_HUMAN	5	3.103e-08	0.3718	0.3718	13.0295	LGALS9	Galectin-9
COC(=O)C1=COC(C2C1CC=C2CO)OC3C(C(C(C(O3)COC4C(C(C(C(O4)CO)O)O)O)O)O)O	MAG_HUMAN	5	9.524e-08	0.2871	0.2871	12.1552	MAG	Myelin-associated glycoprotein
COC(=O)C1=COC(C2C1CC=C2CO)OC3C(C(C(C(O3)COC4C(C(C(C(O4)CO)O)O)O)O)O)O	P2RY4_HUMAN	5	9.741e-06	0.2874	1.1494	8.547	P2RY4	P2Y purinoceptor 4
COC(=O)C1=COC(C2C1CC=C2CO)OC3C(C(C(C(O3)COC4C(C(C(C(O4)CO)O)O)O)O)O)O	P2RY6_HUMAN	5	3.696e-07	0.3	1.4528	11.0978	P2RY6	P2Y purinoceptor 6
COC(=O)C1=COC(C2C1CC=C2CO)OC3C(C(C(C(O3)COC4C(C(C(C(O4)CO)O)O)O)O)O)O	P2Y14_HUMAN	5	1.11e-16	0.2907	1.731	27.9863	P2RY14	P2Y purinoceptor 14
COC(=O)C1=COC(C2C1CC=C2CO)OC3C(C(C(C(O3)COC4C(C(C(C(O4)CO)O)O)O)O)O)O	SC5A1_HUMAN	5	6.943e-08	0.3049	5.4515	12.4016	SLC5A1	Sodium/glucose cotransporter 1
COC(=O)C1=COC(C2C1CC=C2CO)OC3C(C(C(C(O3)COC4C(C(C(C(O4)CO)O)O)O)O)O)O	SC5A2_HUMAN	5	2.662e-08	0.3333	6.938	13.1492	SLC5A2	Sodium/glucose cotransporter 2
COC(=O)C1=COC(C2C1CC=C2CO)OC3C(C(C(C(O3)COC4C(C(C(C(O4)CO)O)O)O)O)O)O	SUIS_HUMAN	5	9.643e-07	0.3151	0.6301	10.3502	SI	Sucrase-isomaltase, intestinal
COC(=O)C1=COC(C2C1CC=C2CO)OC3C(C(C(C(O3)COC4C(C(C(C(O4)CO)O)O)O)O)O)O	TF_HUMAN	5	2.606e-06	0.3297	2.4423	9.575	F3	Tissue factor
COC(=O)C1=COC(C2C1CC=C2CO)OC3C(C(C(C(O3)COC4C(C(C(C(O4)CO)O)O)O)O)O)O	TYRO_HUMAN	5	2.023e-17	0.2892	1.7316	29.5209	TYR	Tyrosinase
COC(=O)C1=COC(C2C1CC=C2CO)OC3C(C(C(C(O3)COC4C(C(C(C(O4)CO)O)O)O)O)O)O	VEGFA_HUMAN	5	1.11e-16	0.3472	1.0084	28.2989	VEGFA	Vascular endothelial growth factor A
C1C(C(C(CC1(C(=O)O)O)OC(=O)C=CC2=CC(=C(C=C2)O)O)O)O	A4_HUMAN	5	3.291e-19	0.8333	13.0068	32.7322	APP	Amyloid-beta precursor protein
C1C(C(C(CC1(C(=O)O)O)OC(=O)C=CC2=CC(=C(C=C2)O)O)O)O	AK1BA_HUMAN	5	1.281e-23	0.9111	3.4619	40.649	AKR1B10	Aldo-keto reductase family 1 member B10
C1C(C(C(CC1(C(=O)O)O)OC(=O)C=CC2=CC(=C(C=C2)O)O)O)O	AK1C4_HUMAN	5	5.191e-10	0.4211	0.4211	16.219	AKR1C4	Aldo-keto reductase family 1 member C4
C1C(C(C(CC1(C(=O)O)O)OC(=O)C=CC2=CC(=C(C=C2)O)O)O)O	ALDR_HUMAN	5	3.968e-08	0.9111	4.2749	12.8379	AKR1B1	Aldo-keto reductase family 1 member B1
C1C(C(C(CC1(C(=O)O)O)OC(=O)C=CC2=CC(=C(C=C2)O)O)O)O	CAH14_HUMAN	5	1.039e-07	0.4468	3.6041	12.0877	CA14	Carbonic anhydrase 14
C1C(C(C(CC1(C(=O)O)O)OC(=O)C=CC2=CC(=C(C=C2)O)O)O)O	CAH5B_HUMAN	5	4.102e-11	0.4468	2.7011	18.198	CA5B	Carbonic anhydrase 5B, mitochondrial
C1C(C(C(CC1(C(=O)O)O)OC(=O)C=CC2=CC(=C(C=C2)O)O)O)O	CAH6_HUMAN	5	4.439e-12	0.4468	3.0466	19.9317	CA6	Carbonic anhydrase 6
C1C(C(C(CC1(C(=O)O)O)OC(=O)C=CC2=CC(=C(C=C2)O)O)O)O	CAH5A_HUMAN	5	1.511e-09	0.4468	2.7308	15.3862	CA5A	Carbonic anhydrase 5A, mitochondrial
C1C(C(C(CC1(C(=O)O)O)OC(=O)C=CC2=CC(=C(C=C2)O)O)O)O	CAH7_HUMAN	5	1.049e-07	0.4468	4.2484	12.08	CA7	Carbonic anhydrase 7
C1C(C(C(CC1(C(=O)O)O)OC(=O)C=CC2=CC(=C(C=C2)O)O)O)O	CBS_HUMAN	5	6.343e-11	0.2927	0.2927	17.858	CBS	Cystathionine beta-synthase
C1C(C(C(CC1(C(=O)O)O)OC(=O)C=CC2=CC(=C(C=C2)O)O)O)O	CH10_HUMAN	5	7.319e-09	0.2951	0.2951	14.1558	HSPE1	10 kDa heat shock protein, mitochondrial
C1C(C(C(CC1(C(=O)O)O)OC(=O)C=CC2=CC(=C(C=C2)O)O)O)O	CH60_HUMAN	5	7.319e-09	0.2951	0.2951	14.1558	HSPD1	60 kDa heat shock protein, mitochondrial
C1C(C(C(CC1(C(=O)O)O)OC(=O)C=CC2=CC(=C(C=C2)O)O)O)O	G6PT1_HUMAN	5	3.996e-13	0.4507	0.4507	21.809	SLC37A4	Glucose-6-phosphate exchanger SLC37A4
C1C(C(C(CC1(C(=O)O)O)OC(=O)C=CC2=CC(=C(C=C2)O)O)O)O	LGUL_HUMAN	5	4.478e-13	0.3469	1.2484	21.7202	GLO1	Lactoylglutathione lyase
C1C(C(C(CC1(C(=O)O)O)OC(=O)C=CC2=CC(=C(C=C2)O)O)O)O	MDR1_HUMAN	5	1.674e-08	0.3158	6.7484	13.5108	ABCB1	ATP-dependent translocase ABCB1
C1C(C(C(CC1(C(=O)O)O)OC(=O)C=CC2=CC(=C(C=C2)O)O)O)O	MYOC_HUMAN	5	1.849e-30	0.3774	0.3774	52.9304	MYOC	Myocilin
C1C(C(C(CC1(C(=O)O)O)OC(=O)C=CC2=CC(=C(C=C2)O)O)O)O	NEMO_HUMAN	5	7.112e-06	0.2857	0.2857	8.7922	IKBKG	NF-kappa-B essential modulator
C1C(C(C(CC1(C(=O)O)O)OC(=O)C=CC2=CC(=C(C=C2)O)O)O)O	NF2L2_HUMAN	5	8.821e-06	0.3273	0.6431	8.6244	NFE2L2	Nuclear factor erythroid 2-related factor 2
C1C(C(C(CC1(C(=O)O)O)OC(=O)C=CC2=CC(=C(C=C2)O)O)O)O	NFKB1_HUMAN	5	2.465e-14	0.3158	1.1944	23.9813	NFKB1	Nuclear factor NF-kappa-B p105 subunit
C1C(C(C(CC1(C(=O)O)O)OC(=O)C=CC2=CC(=C(C=C2)O)O)O)O	NR0B2_HUMAN	5	1.276e-48	0.3433	0.9585	85.5353	NR0B2	Nuclear receptor subfamily 0 group B member 2
C1C(C(C(CC1(C(=O)O)O)OC(=O)C=CC2=CC(=C(C=C2)O)O)O)O	PTN11_HUMAN	5	2.831e-06	0.3433	2.1664	9.5105	PTPN11	Tyrosine-protein phosphatase non-receptor type 11
C1C(C(C(CC1(C(=O)O)O)OC(=O)C=CC2=CC(=C(C=C2)O)O)O)O	SDF1_HUMAN	5	2.292e-49	0.3636	2.701	86.8737	CXCL12	Stromal cell-derived factor 1
C1C(C(C(CC1(C(=O)O)O)OC(=O)C=CC2=CC(=C(C=C2)O)O)O)O	TAU_HUMAN	5	1.195e-13	0.3167	2.6588	22.7504	MAPT	Microtubule-associated protein tau
C1C(C(C(CC1(C(=O)O)O)OC(=O)C=CC2=CC(=C(C=C2)O)O)O)O	TF65_HUMAN	5	2.957e-06	0.3462	0.9783	9.4765	RELA	Transcription factor p65
C1C(C(C(CC1(C(=O)O)O)OC(=O)C=CC2=CC(=C(C=C2)O)O)O)O	TTHY_HUMAN	5	2.768e-08	0.4211	1.1509	13.1187	TTR	Transthyretin
COC(=O)C1=COC(C2C1CC=C2CO)OC3C(C(C(C(O3)CO)O)O)O	AMY1A_HUMAN	5	1.582e-32	0.3378	0.6357	56.6426	AMY1A	Alpha-amylase 1
COC(=O)C1=COC(C2C1CC=C2CO)OC3C(C(C(C(O3)CO)O)O)O	AMYP_HUMAN	5	1.839e-60	0.3375	0.9908	106.794	AMY2A	Pancreatic alpha-amylase
COC(=O)C1=COC(C2C1CC=C2CO)OC3C(C(C(C(O3)CO)O)O)O	BIP_HUMAN	5	1.466e-08	0.338	0.338	13.6144	HSPA5	Endoplasmic reticulum chaperone BiP
COC(=O)C1=COC(C2C1CC=C2CO)OC3C(C(C(C(O3)CO)O)O)O	CAH14_HUMAN	5	3.52e-07	0.3553	3.3497	11.136	CA14	Carbonic anhydrase 14
COC(=O)C1=COC(C2C1CC=C2CO)OC3C(C(C(C(O3)CO)O)O)O	CAH12_HUMAN	5	1.851e-07	0.3553	10.44	11.637	CA12	Carbonic anhydrase 12
COC(=O)C1=COC(C2C1CC=C2CO)OC3C(C(C(C(O3)CO)O)O)O	CAH9_HUMAN	5	3.169e-07	0.3553	11.6862	11.2178	CA9	Carbonic anhydrase 9
COC(=O)C1=COC(C2C1CC=C2CO)OC3C(C(C(C(O3)CO)O)O)O	CD69_HUMAN	5	5.661e-24	0.3056	0.6056	41.2859	CD69	Early activation antigen CD69
COC(=O)C1=COC(C2C1CC=C2CO)OC3C(C(C(C(O3)CO)O)O)O	CXB2_HUMAN	5	5.166e-42	0.3333	0.3333	73.6729	GJB2	Gap junction beta-2 protein
COC(=O)C1=COC(C2C1CC=C2CO)OC3C(C(C(C(O3)CO)O)O)O	FGF2_HUMAN	5	5.581e-24	0.3699	1.0564	41.297	FGF2	Fibroblast growth factor 2
COC(=O)C1=COC(C2C1CC=C2CO)OC3C(C(C(C(O3)CO)O)O)O	FGF1_HUMAN	5	1.022e-29	0.3699	1.0564	51.5973	FGF1	Fibroblast growth factor 1
COC(=O)C1=COC(C2C1CC=C2CO)OC3C(C(C(C(O3)CO)O)O)O	IL2_HUMAN	5	1.747e-17	0.4118	0.9939	29.6352	IL2	Interleukin-2
COC(=O)C1=COC(C2C1CC=C2CO)OC3C(C(C(C(O3)CO)O)O)O	LEG3_HUMAN	5	2.807e-36	0.3836	4.1077	63.3766	LGALS3	Galectin-3
COC(=O)C1=COC(C2C1CC=C2CO)OC3C(C(C(C(O3)CO)O)O)O	LEG4_HUMAN	5	8.782e-60	0.3425	0.9795	105.575	LGALS4	Galectin-4
COC(=O)C1=COC(C2C1CC=C2CO)OC3C(C(C(C(O3)CO)O)O)O	LEG7_HUMAN	5	2.856e-08	0.3086	0.3086	13.0943	LGALS7; LGALS7B	Galectin-7
COC(=O)C1=COC(C2C1CC=C2CO)OC3C(C(C(C(O3)CO)O)O)O	LEG8_HUMAN	5	8.782e-60	0.3425	0.9795	105.575	LGALS8	Galectin-8
COC(=O)C1=COC(C2C1CC=C2CO)OC3C(C(C(C(O3)CO)O)O)O	LEG9_HUMAN	5	1.798e-08	0.3836	0.3836	13.4551	LGALS9	Galectin-9
COC(=O)C1=COC(C2C1CC=C2CO)OC3C(C(C(C(O3)CO)O)O)O	LYAG_HUMAN	5	8.65e-06	0.3378	0.3378	8.6396	GAA	Lysosomal alpha-glucosidase
COC(=O)C1=COC(C2C1CC=C2CO)OC3C(C(C(C(O3)CO)O)O)O	MGA_HUMAN	5	1.474e-06	0.3433	0.9147	10.0193	MGAM	Maltase-glucoamylase, intestinal
COC(=O)C1=COC(C2C1CC=C2CO)OC3C(C(C(C(O3)CO)O)O)O	P2Y14_HUMAN	5	5.884e-11	0.2805	1.122	17.9167	P2RY14	P2Y purinoceptor 14
COC(=O)C1=COC(C2C1CC=C2CO)OC3C(C(C(C(O3)CO)O)O)O	SC5A1_HUMAN	5	1.355e-22	0.3289	15.6646	38.8102	SLC5A1	Sodium/glucose cotransporter 1
COC(=O)C1=COC(C2C1CC=C2CO)OC3C(C(C(C(O3)CO)O)O)O	SC5A2_HUMAN	5	3.808e-23	0.3289	19.2554	39.7998	SLC5A2	Sodium/glucose cotransporter 2
COC(=O)C1=COC(C2C1CC=C2CO)OC3C(C(C(C(O3)CO)O)O)O	SC5A4_HUMAN	5	1.078e-08	0.3099	0.5993	13.854	SLC5A4	Solute carrier family 5 member 4
COC(=O)C1=COC(C2C1CC=C2CO)OC3C(C(C(C(O3)CO)O)O)O	SUIS_HUMAN	5	7.899e-13	0.3433	1.258	21.2777	SI	Sucrase-isomaltase, intestinal
COC(=O)C1=COC(C2C1CC=C2CO)OC3C(C(C(C(O3)CO)O)O)O	TF_HUMAN	5	1.002e-06	0.3529	2.6101	10.3202	F3	Tissue factor
COC(=O)C1=COC(C2C1CC=C2CO)OC3C(C(C(C(O3)CO)O)O)O	TYRO_HUMAN	5	4.296e-27	0.3117	2.7294	46.887	TYR	Tyrosinase
COC(=O)C1=COC(C2C1CC=C2CO)OC3C(C(C(C(O3)CO)O)O)O	VEGFA_HUMAN	5	1.675e-17	0.3699	1.0564	29.6682	VEGFA	Vascular endothelial growth factor A
CC12CC(C3CC1(C3(C(=O)O2)COC(=O)C4=CC=CC=C4)OC5C(C(C(C(O5)CO)O)O)O)O	AMYP_HUMAN	5	4.879e-18	0.2857	0.2857	30.6299	AMY2A	Pancreatic alpha-amylase
CC12CC(C3CC1(C3(C(=O)O2)COC(=O)C4=CC=CC=C4)OC5C(C(C(C(O5)CO)O)O)O)O	CAH14_HUMAN	5	4.307e-07	0.3333	3.3076	10.9787	CA14	Carbonic anhydrase 14
CC12CC(C3CC1(C3(C(=O)O2)COC(=O)C4=CC=CC=C4)OC5C(C(C(C(O5)CO)O)O)O)O	CAH12_HUMAN	5	2.352e-06	0.3333	8.9657	9.6552	CA12	Carbonic anhydrase 12
CC12CC(C3CC1(C3(C(=O)O2)COC(=O)C4=CC=CC=C4)OC5C(C(C(C(O5)CO)O)O)O)O	CAH9_HUMAN	5	3.402e-06	0.3333	10.1174	9.3671	CA9	Carbonic anhydrase 9
CC12CC(C3CC1(C3(C(=O)O2)COC(=O)C4=CC=CC=C4)OC5C(C(C(C(O5)CO)O)O)O)O	CD22_HUMAN	5	3.356e-47	0.3077	2.9251	82.9859	CD22	B-cell receptor CD22
CC12CC(C3CC1(C3(C(=O)O2)COC(=O)C4=CC=CC=C4)OC5C(C(C(C(O5)CO)O)O)O)O	FGF2_HUMAN	5	2.22e-16	0.3611	0.7155	27.8423	FGF2	Fibroblast growth factor 2
CC12CC(C3CC1(C3(C(=O)O2)COC(=O)C4=CC=CC=C4)OC5C(C(C(C(O5)CO)O)O)O)O	FGF1_HUMAN	5	2.224e-20	0.3611	0.7155	34.8331	FGF1	Fibroblast growth factor 1
CC12CC(C3CC1(C3(C(=O)O2)COC(=O)C4=CC=CC=C4)OC5C(C(C(C(O5)CO)O)O)O)O	GRP1_HUMAN	5	3.249e-08	0.2892	0.2892	12.9937	RASGRP1	RAS guanyl-releasing protein 1
CC12CC(C3CC1(C3(C(=O)O2)COC(=O)C4=CC=CC=C4)OC5C(C(C(C(O5)CO)O)O)O)O	GRP3_HUMAN	5	1.423e-38	0.3	4.3223	67.4972	RASGRP3	Ras guanyl-releasing protein 3
CC12CC(C3CC1(C3(C(=O)O2)COC(=O)C4=CC=CC=C4)OC5C(C(C(C(O5)CO)O)O)O)O	IL2_HUMAN	5	2.331e-10	0.2857	0.5714	16.8433	IL2	Interleukin-2
CC12CC(C3CC1(C3(C(=O)O2)COC(=O)C4=CC=CC=C4)OC5C(C(C(C(O5)CO)O)O)O)O	KPCA_HUMAN	5	1.38e-18	0.3506	12.4198	31.6147	PRKCA	Protein kinase C alpha type
CC12CC(C3CC1(C3(C(=O)O2)COC(=O)C4=CC=CC=C4)OC5C(C(C(C(O5)CO)O)O)O)O	KPCE_HUMAN	5	6.432e-07	0.3125	2.3506	10.6659	PRKCE	Protein kinase C epsilon type
CC12CC(C3CC1(C3(C(=O)O2)COC(=O)C4=CC=CC=C4)OC5C(C(C(C(O5)CO)O)O)O)O	LEG3_HUMAN	5	3.664e-33	0.3846	3.7488	57.7829	LGALS3	Galectin-3
CC12CC(C3CC1(C3(C(=O)O2)COC(=O)C4=CC=CC=C4)OC5C(C(C(C(O5)CO)O)O)O)O	LEG1_HUMAN	5	7.481e-12	0.3768	0.6806	19.5247	LGALS1	Galectin-1
CC12CC(C3CC1(C3(C(=O)O2)COC(=O)C4=CC=CC=C4)OC5C(C(C(C(O5)CO)O)O)O)O	LEG4_HUMAN	5	1.006e-17	0.2805	0.2805	30.0653	LGALS4	Galectin-4
CC12CC(C3CC1(C3(C(=O)O2)COC(=O)C4=CC=CC=C4)OC5C(C(C(C(O5)CO)O)O)O)O	LEG7_HUMAN	5	2.331e-15	0.3014	0.6002	25.8227	LGALS7; LGALS7B	Galectin-7
CC12CC(C3CC1(C3(C(=O)O2)COC(=O)C4=CC=CC=C4)OC5C(C(C(C(O5)CO)O)O)O)O	LEG8_HUMAN	5	1.006e-17	0.2805	0.2805	30.0653	LGALS8	Galectin-8
CC12CC(C3CC1(C3(C(=O)O2)COC(=O)C4=CC=CC=C4)OC5C(C(C(C(O5)CO)O)O)O)O	LEG9_HUMAN	5	2.59e-40	0.3846	1.964	70.6206	LGALS9	Galectin-9
CC12CC(C3CC1(C3(C(=O)O2)COC(=O)C4=CC=CC=C4)OC5C(C(C(C(O5)CO)O)O)O)O	LYAM3_HUMAN	5	8.367e-06	0.3516	0.6726	8.6655	SELP	P-selectin
CC12CC(C3CC1(C3(C(=O)O2)COC(=O)C4=CC=CC=C4)OC5C(C(C(C(O5)CO)O)O)O)O	MAG_HUMAN	5	3.455e-29	0.3143	1.1689	50.6475	MAG	Myelin-associated glycoprotein
CC12CC(C3CC1(C3(C(=O)O2)COC(=O)C4=CC=CC=C4)OC5C(C(C(C(O5)CO)O)O)O)O	MDR1_HUMAN	5	1.311e-10	0.3412	8.4134	17.292	ABCB1	ATP-dependent translocase ABCB1
CC12CC(C3CC1(C3(C(=O)O2)COC(=O)C4=CC=CC=C4)OC5C(C(C(C(O5)CO)O)O)O)O	S28A3_HUMAN	5	6.395e-36	0.284	0.284	62.7347	SLC28A3	Solute carrier family 28 member 3
CC12CC(C3CC1(C3(C(=O)O2)COC(=O)C4=CC=CC=C4)OC5C(C(C(C(O5)CO)O)O)O)O	SC5A1_HUMAN	5	3.46e-22	0.3333	15.3819	38.0792	SLC5A1	Sodium/glucose cotransporter 1
CC12CC(C3CC1(C3(C(=O)O2)COC(=O)C4=CC=CC=C4)OC5C(C(C(C(O5)CO)O)O)O)O	SC5A2_HUMAN	5	3.691e-24	0.3514	20.0964	41.6193	SLC5A2	Sodium/glucose cotransporter 2
CC12CC(C3CC1(C3(C(=O)O2)COC(=O)C4=CC=CC=C4)OC5C(C(C(C(O5)CO)O)O)O)O	SC5A4_HUMAN	5	7.281e-09	0.3158	0.6121	14.1599	SLC5A4	Solute carrier family 5 member 4
CC12CC(C3CC1(C3(C(=O)O2)COC(=O)C4=CC=CC=C4)OC5C(C(C(C(O5)CO)O)O)O)O	TYRO_HUMAN	5	3.224e-17	0.2857	1.7108	29.1577	TYR	Tyrosinase
CC12CC(C3CC1(C3(C(=O)O2)COC(=O)C4=CC=CC=C4)OC5C(C(C(C(O5)CO)O)O)O)O	VEGFA_HUMAN	5	4.382e-12	0.3611	0.7155	19.9417	VEGFA	Vascular endothelial growth factor A
C1C(OC2=C(C1=O)C=CC(=C2)O)C3=CC=C(C=C3)OC4C(C(C(C(O4)CO)O)O)OC5C(C(CO5)(CO)O)O	AL1A2_HUMAN	5	9.553e-12	0.3735	0.3735	19.3341	ALDH1A2	Retinal dehydrogenase 2
C1C(OC2=C(C1=O)C=CC(=C2)O)C3=CC=C(C=C3)OC4C(C(C(C(O4)CO)O)O)OC5C(C(CO5)(CO)O)O	AL1B1_HUMAN	5	1.246e-12	0.3735	0.3735	20.9225	ALDH1B1	Aldehyde dehydrogenase X, mitochondrial
C1C(OC2=C(C1=O)C=CC(=C2)O)C3=CC=C(C=C3)OC4C(C(C(C(O4)CO)O)O)OC5C(C(CO5)(CO)O)O	AOFB_HUMAN	5	1.624e-06	0.3944	7.8398	9.9438	MAOB	Amine oxidase [flavin-containing] B
C1C(OC2=C(C1=O)C=CC(=C2)O)C3=CC=C(C=C3)OC4C(C(C(C(O4)CO)O)O)OC5C(C(CO5)(CO)O)O	CD22_HUMAN	5	4.607e-10	0.2963	0.5883	16.3121	CD22	B-cell receptor CD22
C1C(OC2=C(C1=O)C=CC(=C2)O)C3=CC=C(C=C3)OC4C(C(C(C(O4)CO)O)O)OC5C(C(CO5)(CO)O)O	CP19A_HUMAN	5	1.68e-07	0.5488	7.6718	11.7127	CYP19A1	Aromatase
C1C(OC2=C(C1=O)C=CC(=C2)O)C3=CC=C(C=C3)OC4C(C(C(C(O4)CO)O)O)OC5C(C(CO5)(CO)O)O	CP1B1_HUMAN	5	2.427e-07	0.3506	1.5646	11.4259	CYP1B1	Cytochrome P450 1B1
C1C(OC2=C(C1=O)C=CC(=C2)O)C3=CC=C(C=C3)OC4C(C(C(C(O4)CO)O)O)OC5C(C(CO5)(CO)O)O	FGF1_HUMAN	5	9.214e-19	0.3462	0.6565	31.9295	FGF1	Fibroblast growth factor 1
C1C(OC2=C(C1=O)C=CC(=C2)O)C3=CC=C(C=C3)OC4C(C(C(C(O4)CO)O)O)OC5C(C(CO5)(CO)O)O	FGF2_HUMAN	5	3.442e-15	0.3462	0.6565	25.5119	FGF2	Fibroblast growth factor 2
C1C(OC2=C(C1=O)C=CC(=C2)O)C3=CC=C(C=C3)OC4C(C(C(C(O4)CO)O)O)OC5C(C(CO5)(CO)O)O	IL2_HUMAN	5	1.231e-23	0.3735	1.3586	40.6804	IL2	Interleukin-2
C1C(OC2=C(C1=O)C=CC(=C2)O)C3=CC=C(C=C3)OC4C(C(C(C(O4)CO)O)O)OC5C(C(CO5)(CO)O)O	PDIA1_HUMAN	5	8.996e-13	0.3034	1.1834	21.1763	P4HB	Protein disulfide-isomerase
C1C(OC2=C(C1=O)C=CC(=C2)O)C3=CC=C(C=C3)OC4C(C(C(C(O4)CO)O)O)OC5C(C(CO5)(CO)O)O	S28A3_HUMAN	5	9.406e-37	0.2907	0.2907	64.2292	SLC28A3	Solute carrier family 28 member 3
C1C(OC2=C(C1=O)C=CC(=C2)O)C3=CC=C(C=C3)OC4C(C(C(C(O4)CO)O)O)OC5C(C(CO5)(CO)O)O	T2R31_HUMAN	5	7.168e-34	0.3377	0.6627	59.055	TAS2R31	Taste receptor type 2 member 31
C1C(OC2=C(C1=O)C=CC(=C2)O)C3=CC=C(C=C3)OC4C(C(C(C(O4)CO)O)O)OC5C(C(CO5)(CO)O)O	TYRO_HUMAN	5	1.988e-36	0.4051	3.6923	63.6456	TYR	Tyrosinase
C1C(OC2=C(C1=O)C=CC(=C2)O)C3=CC=C(C=C3)OC4C(C(C(C(O4)CO)O)O)OC5C(C(CO5)(CO)O)O	VEGFA_HUMAN	5	3.802e-11	0.3462	0.6565	18.2571	VEGFA	Vascular endothelial growth factor A
C1C(OC2=C(C1=O)C=CC(=C2)O)C3=CC=C(C=C3)OC4C(C(C(C(O4)CO)O)O)O	AL1A2_HUMAN	5	1.887e-15	0.5	0.5	25.999	ALDH1A2	Retinal dehydrogenase 2
C1C(OC2=C(C1=O)C=CC(=C2)O)C3=CC=C(C=C3)OC4C(C(C(C(O4)CO)O)O)O	AL1B1_HUMAN	5	1.11e-16	0.5	0.5	28.1207	ALDH1B1	Aldehyde dehydrogenase X, mitochondrial
C1C(OC2=C(C1=O)C=CC(=C2)O)C3=CC=C(C=C3)OC4C(C(C(C(O4)CO)O)O)O	AOFB_HUMAN	5	3.052e-08	0.4746	9.8368	13.0426	MAOB	Amine oxidase [flavin-containing] B
C1C(OC2=C(C1=O)C=CC(=C2)O)C3=CC=C(C=C3)OC4C(C(C(C(O4)CO)O)O)O	B4GT1_HUMAN	5	1.126e-18	0.2963	0.2963	31.7731	B4GALT1	Beta-1,4-galactosyltransferase 1
C1C(OC2=C(C1=O)C=CC(=C2)O)C3=CC=C(C=C3)OC4C(C(C(C(O4)CO)O)O)O	CAH13_HUMAN	5	1.924e-07	0.3768	1.7859	11.6071	CA13	Carbonic anhydrase 13
C1C(OC2=C(C1=O)C=CC(=C2)O)C3=CC=C(C=C3)OC4C(C(C(C(O4)CO)O)O)O	CAH12_HUMAN	5	4.033e-08	0.4478	11.3239	12.8251	CA12	Carbonic anhydrase 12
C1C(OC2=C(C1=O)C=CC(=C2)O)C3=CC=C(C=C3)OC4C(C(C(C(O4)CO)O)O)O	CAH4_HUMAN	5	5.429e-07	0.3973	3.0638	10.7981	CA4	Carbonic anhydrase 4
C1C(OC2=C(C1=O)C=CC(=C2)O)C3=CC=C(C=C3)OC4C(C(C(C(O4)CO)O)O)O	CAH5A_HUMAN	5	6.15e-06	0.3529	1.6561	8.9055	CA5A	Carbonic anhydrase 5A, mitochondrial
C1C(OC2=C(C1=O)C=CC(=C2)O)C3=CC=C(C=C3)OC4C(C(C(C(O4)CO)O)O)O	CAH7_HUMAN	5	1.828e-07	0.3973	4.1131	11.647	CA7	Carbonic anhydrase 7
C1C(OC2=C(C1=O)C=CC(=C2)O)C3=CC=C(C=C3)OC4C(C(C(C(O4)CO)O)O)O	CAH9_HUMAN	5	7.437e-07	0.4478	11.1224	10.5527	CA9	Carbonic anhydrase 9
C1C(OC2=C(C1=O)C=CC(=C2)O)C3=CC=C(C=C3)OC4C(C(C(C(O4)CO)O)O)O	CD22_HUMAN	5	6.204e-48	0.3196	2.9712	84.3022	CD22	B-cell receptor CD22
C1C(OC2=C(C1=O)C=CC(=C2)O)C3=CC=C(C=C3)OC4C(C(C(C(O4)CO)O)O)O	CP19A_HUMAN	5	6.187e-11	0.5849	11.1067	17.8775	CYP19A1	Aromatase
C1C(OC2=C(C1=O)C=CC(=C2)O)C3=CC=C(C=C3)OC4C(C(C(C(O4)CO)O)O)O	CP1B1_HUMAN	5	1.825e-08	0.4154	1.8199	13.4437	CYP1B1	Cytochrome P450 1B1
C1C(OC2=C(C1=O)C=CC(=C2)O)C3=CC=C(C=C3)OC4C(C(C(C(O4)CO)O)O)O	ERAP1_HUMAN	5	2.888e-07	0.403	1.209	11.2903	ERAP1	Endoplasmic reticulum aminopeptidase 1
C1C(OC2=C(C1=O)C=CC(=C2)O)C3=CC=C(C=C3)OC4C(C(C(C(O4)CO)O)O)O	ESR1_HUMAN	5	2.611e-22	0.3889	27.2378	38.2987	ESR1	Estrogen receptor
C1C(OC2=C(C1=O)C=CC(=C2)O)C3=CC=C(C=C3)OC4C(C(C(C(O4)CO)O)O)O	ESR2_HUMAN	5	3.06e-24	0.359	25.1649	41.7656	ESR2	Estrogen receptor beta
C1C(OC2=C(C1=O)C=CC(=C2)O)C3=CC=C(C=C3)OC4C(C(C(C(O4)CO)O)O)O	FGF1_HUMAN	5	6.455e-27	0.3478	0.9542	46.5695	FGF1	Fibroblast growth factor 1
C1C(OC2=C(C1=O)C=CC(=C2)O)C3=CC=C(C=C3)OC4C(C(C(C(O4)CO)O)O)O	FGF2_HUMAN	5	9.872e-22	0.3478	0.9542	37.2617	FGF2	Fibroblast growth factor 2
C1C(OC2=C(C1=O)C=CC(=C2)O)C3=CC=C(C=C3)OC4C(C(C(C(O4)CO)O)O)O	IL2_HUMAN	5	3.02e-31	0.5	1.8098	54.3431	IL2	Interleukin-2
C1C(OC2=C(C1=O)C=CC(=C2)O)C3=CC=C(C=C3)OC4C(C(C(C(O4)CO)O)O)O	IL6_HUMAN	5	8.23e-08	0.3056	0.3056	12.2691	IL6	Interleukin-6
C1C(OC2=C(C1=O)C=CC(=C2)O)C3=CC=C(C=C3)OC4C(C(C(C(O4)CO)O)O)O	KLK2_HUMAN	5	1.973e-12	0.3038	0.3038	20.5639	KLK2	Kallikrein-2
C1C(OC2=C(C1=O)C=CC(=C2)O)C3=CC=C(C=C3)OC4C(C(C(C(O4)CO)O)O)O	LEG3_HUMAN	5	1.593e-10	0.2875	1.1415	17.14	LGALS3	Galectin-3
C1C(OC2=C(C1=O)C=CC(=C2)O)C3=CC=C(C=C3)OC4C(C(C(C(O4)CO)O)O)O	LEG9_HUMAN	5	2.97e-12	0.2875	0.5713	20.2451	LGALS9	Galectin-9
C1C(OC2=C(C1=O)C=CC(=C2)O)C3=CC=C(C=C3)OC4C(C(C(C(O4)CO)O)O)O	NMUR2_HUMAN	5	3.22e-09	0.2874	0.2874	14.7961	NMUR2	Neuromedin-U receptor 2
C1C(OC2=C(C1=O)C=CC(=C2)O)C3=CC=C(C=C3)OC4C(C(C(C(O4)CO)O)O)O	PDIA1_HUMAN	5	2.594e-21	0.3973	2.0167	36.5084	P4HB	Protein disulfide-isomerase
C1C(OC2=C(C1=O)C=CC(=C2)O)C3=CC=C(C=C3)OC4C(C(C(C(O4)CO)O)O)O	PLGF_HUMAN	5	4.441e-16	0.3067	0.3067	27.1903	PGF	Placenta growth factor
C1C(OC2=C(C1=O)C=CC(=C2)O)C3=CC=C(C=C3)OC4C(C(C(C(O4)CO)O)O)O	RASH_HUMAN	5	1.036e-08	0.3333	0.64	13.8848	HRAS	GTPase HRas
C1C(OC2=C(C1=O)C=CC(=C2)O)C3=CC=C(C=C3)OC4C(C(C(C(O4)CO)O)O)O	RASN_HUMAN	5	1.674e-38	0.3049	0.3049	67.3701	NRAS	GTPase NRas
C1C(OC2=C(C1=O)C=CC(=C2)O)C3=CC=C(C=C3)OC4C(C(C(C(O4)CO)O)O)O	S28A3_HUMAN	5	3.737e-47	0.375	0.375	82.9021	SLC28A3	Solute carrier family 28 member 3
C1C(OC2=C(C1=O)C=CC(=C2)O)C3=CC=C(C=C3)OC4C(C(C(C(O4)CO)O)O)O	SC5A1_HUMAN	5	1.592e-54	0.3889	37.834	96.1347	SLC5A1	Sodium/glucose cotransporter 1
C1C(OC2=C(C1=O)C=CC(=C2)O)C3=CC=C(C=C3)OC4C(C(C(C(O4)CO)O)O)O	SC5A2_HUMAN	5	9.564e-86	0.3889	71.1986	152.187	SLC5A2	Sodium/glucose cotransporter 2
C1C(OC2=C(C1=O)C=CC(=C2)O)C3=CC=C(C=C3)OC4C(C(C(C(O4)CO)O)O)O	SC5A4_HUMAN	5	1.487e-22	0.3889	1.6368	38.7377	SLC5A4	Solute carrier family 5 member 4
C1C(OC2=C(C1=O)C=CC(=C2)O)C3=CC=C(C=C3)OC4C(C(C(C(O4)CO)O)O)O	SC5AB_HUMAN	5	1.342e-24	0.3026	0.3026	42.4084	SLC5A11	Sodium/myo-inositol cotransporter 2
C1C(OC2=C(C1=O)C=CC(=C2)O)C3=CC=C(C=C3)OC4C(C(C(C(O4)CO)O)O)O	SYYC_HUMAN	5	4.584e-06	0.3067	0.3067	9.1348	YARS1	Tyrosine--tRNA ligase, cytoplasmic
C1C(OC2=C(C1=O)C=CC(=C2)O)C3=CC=C(C=C3)OC4C(C(C(C(O4)CO)O)O)O	T2R31_HUMAN	5	3.528e-55	0.4	1.09	97.3095	TAS2R31	Taste receptor type 2 member 31
C1C(OC2=C(C1=O)C=CC(=C2)O)C3=CC=C(C=C3)OC4C(C(C(C(O4)CO)O)O)O	TOP1_HUMAN	5	4.174e-36	0.3297	11.1957	63.0673	TOP1	DNA topoisomerase 1
C1C(OC2=C(C1=O)C=CC(=C2)O)C3=CC=C(C=C3)OC4C(C(C(C(O4)CO)O)O)O	TYRO_HUMAN	5	2.988e-46	0.5082	4.7056	81.2811	TYR	Tyrosinase
C1C(OC2=C(C1=O)C=CC(=C2)O)C3=CC=C(C=C3)OC4C(C(C(C(O4)CO)O)O)O	VEGFA_HUMAN	5	9.442e-21	0.3478	1.2609	35.5011	VEGFA	Vascular endothelial growth factor A
C1=C(C=C(C(=C1O)O)O)C(=O)OCC2C(C(C(C(O2)OC(=O)C3=CC(=C(C(=C3)O)O)O)OC(=O)C4=CC(=C(C(=C4)O)O)O)OC(=O)C5=CC(=C(C(=C5)O)O)O)OC(=O)C6=CC(=C(C(=C6)O)O)O	6PGD_HUMAN	5	1.437e-36	0.3621	1.3908	63.8985	PGD	6-phosphogluconate dehydrogenase, decarboxylating
C1=C(C=C(C(=C1O)O)O)C(=O)OCC2C(C(C(C(O2)OC(=O)C3=CC(=C(C(=C3)O)O)O)OC(=O)C4=CC(=C(C(=C4)O)O)O)OC(=O)C5=CC(=C(C(=C5)O)O)O)OC(=O)C6=CC(=C(C(=C6)O)O)O	AMY1A_HUMAN	5	1.089e-50	1	1	89.2496	AMY1A	Alpha-amylase 1
C1=C(C=C(C(=C1O)O)O)C(=O)OCC2C(C(C(C(O2)OC(=O)C3=CC(=C(C(=C3)O)O)O)OC(=O)C4=CC(=C(C(=C4)O)O)O)OC(=O)C5=CC(=C(C(=C5)O)O)O)OC(=O)C6=CC(=C(C(=C6)O)O)O	ANTR2_HUMAN	5	5.121e-61	1	1	107.791	ANTXR2	Anthrax toxin receptor 2
C1=C(C=C(C(=C1O)O)O)C(=O)OCC2C(C(C(C(O2)OC(=O)C3=CC(=C(C(=C3)O)O)O)OC(=O)C4=CC(=C(C(=C4)O)O)O)OC(=O)C5=CC(=C(C(=C5)O)O)O)OC(=O)C6=CC(=C(C(=C6)O)O)O	BACE1_HUMAN	5	0.826	1	3.2029	-0.8859	BACE1	Beta-secretase 1
C1=C(C=C(C(=C1O)O)O)C(=O)OCC2C(C(C(C(O2)OC(=O)C3=CC(=C(C(=C3)O)O)O)OC(=O)C4=CC(=C(C(=C4)O)O)O)OC(=O)C5=CC(=C(C(=C5)O)O)O)OC(=O)C6=CC(=C(C(=C6)O)O)O	CAH14_HUMAN	5	1.367e-17	0.3415	8.3466	29.8269	CA14	Carbonic anhydrase 14
C1=C(C=C(C(=C1O)O)O)C(=O)OCC2C(C(C(C(O2)OC(=O)C3=CC(=C(C(=C3)O)O)O)OC(=O)C4=CC(=C(C(=C4)O)O)O)OC(=O)C5=CC(=C(C(=C5)O)O)O)OC(=O)C6=CC(=C(C(=C6)O)O)O	CAH12_HUMAN	5	7.191e-18	0.4118	24.3442	30.3274	CA12	Carbonic anhydrase 12
C1=C(C=C(C(=C1O)O)O)C(=O)OCC2C(C(C(C(O2)OC(=O)C3=CC(=C(C(=C3)O)O)O)OC(=O)C4=CC(=C(C(=C4)O)O)O)OC(=O)C5=CC(=C(C(=C5)O)O)O)OC(=O)C6=CC(=C(C(=C6)O)O)O	CAH1_HUMAN	5	9.56e-13	0.4118	24.6821	21.1288	CA1	Carbonic anhydrase 1
C1=C(C=C(C(=C1O)O)O)C(=O)OCC2C(C(C(C(O2)OC(=O)C3=CC(=C(C(=C3)O)O)O)OC(=O)C4=CC(=C(C(=C4)O)O)O)OC(=O)C5=CC(=C(C(=C5)O)O)O)OC(=O)C6=CC(=C(C(=C6)O)O)O	CAH2_HUMAN	5	9.916e-12	0.4118	26.0349	19.305	CA2	Carbonic anhydrase 2
C1=C(C=C(C(=C1O)O)O)C(=O)OCC2C(C(C(C(O2)OC(=O)C3=CC(=C(C(=C3)O)O)O)OC(=O)C4=CC(=C(C(=C4)O)O)O)OC(=O)C5=CC(=C(C(=C5)O)O)O)OC(=O)C6=CC(=C(C(=C6)O)O)O	CAH5A_HUMAN	5	5.331e-06	0.3415	1.6746	9.017	CA5A	Carbonic anhydrase 5A, mitochondrial
C1=C(C=C(C(=C1O)O)O)C(=O)OCC2C(C(C(C(O2)OC(=O)C3=CC(=C(C(=C3)O)O)O)OC(=O)C4=CC(=C(C(=C4)O)O)O)OC(=O)C5=CC(=C(C(=C5)O)O)O)OC(=O)C6=CC(=C(C(=C6)O)O)O	CAH5B_HUMAN	5	4.731e-07	0.3415	1.6746	10.9054	CA5B	Carbonic anhydrase 5B, mitochondrial
C1=C(C=C(C(=C1O)O)O)C(=O)OCC2C(C(C(C(O2)OC(=O)C3=CC(=C(C(=C3)O)O)O)OC(=O)C4=CC(=C(C(=C4)O)O)O)OC(=O)C5=CC(=C(C(=C5)O)O)O)OC(=O)C6=CC(=C(C(=C6)O)O)O	CAH6_HUMAN	5	7.942e-07	0.3415	1.6746	10.5015	CA6	Carbonic anhydrase 6
C1=C(C=C(C(=C1O)O)O)C(=O)OCC2C(C(C(C(O2)OC(=O)C3=CC(=C(C(=C3)O)O)O)OC(=O)C4=CC(=C(C(=C4)O)O)O)OC(=O)C5=CC(=C(C(=C5)O)O)O)OC(=O)C6=CC(=C(C(=C6)O)O)O	CAH9_HUMAN	5	1.11e-16	0.4118	25.9657	28.0634	CA9	Carbonic anhydrase 9
C1=C(C=C(C(=C1O)O)O)C(=O)OCC2C(C(C(C(O2)OC(=O)C3=CC(=C(C(=C3)O)O)O)OC(=O)C4=CC(=C(C(=C4)O)O)O)OC(=O)C5=CC(=C(C(=C5)O)O)O)OC(=O)C6=CC(=C(C(=C6)O)O)O	DPOLB_HUMAN	5	3.783e-06	0.3617	0.3617	9.2844	POLB	DNA polymerase beta
C1=C(C=C(C(=C1O)O)O)C(=O)OCC2C(C(C(C(O2)OC(=O)C3=CC(=C(C(=C3)O)O)O)OC(=O)C4=CC(=C(C(=C4)O)O)O)OC(=O)C5=CC(=C(C(=C5)O)O)O)OC(=O)C6=CC(=C(C(=C6)O)O)O	ELAV3_HUMAN	5	1.621e-26	0.3387	0.672	45.8516	ELAVL3	ELAV-like protein 3
C1=C(C=C(C(=C1O)O)O)C(=O)OCC2C(C(C(C(O2)OC(=O)C3=CC(=C(C(=C3)O)O)O)OC(=O)C4=CC(=C(C(=C4)O)O)O)OC(=O)C5=CC(=C(C(=C5)O)O)O)OC(=O)C6=CC(=C(C(=C6)O)O)O	FA10_HUMAN	5	0.9962	1	1.45	-1.7883	F10	Coagulation factor X
C1=C(C=C(C(=C1O)O)O)C(=O)OCC2C(C(C(C(O2)OC(=O)C3=CC(=C(C(=C3)O)O)O)OC(=O)C4=CC(=C(C(=C4)O)O)O)OC(=O)C5=CC(=C(C(=C5)O)O)O)OC(=O)C6=CC(=C(C(=C6)O)O)O	FUT4_HUMAN	5	1.472e-45	0.3621	0.3621	80.0379	FUT4	Alpha-(1,3)-fucosyltransferase 4
C1=C(C=C(C(=C1O)O)O)C(=O)OCC2C(C(C(C(O2)OC(=O)C3=CC(=C(C(=C3)O)O)O)OC(=O)C4=CC(=C(C(=C4)O)O)O)OC(=O)C5=CC(=C(C(=C5)O)O)O)OC(=O)C6=CC(=C(C(=C6)O)O)O	FUT7_HUMAN	5	3.596e-47	0.3721	1.0756	82.9321	FUT7	Alpha-(1,3)-fucosyltransferase 7
C1=C(C=C(C(=C1O)O)O)C(=O)OCC2C(C(C(C(O2)OC(=O)C3=CC(=C(C(=C3)O)O)O)OC(=O)C4=CC(=C(C(=C4)O)O)O)OC(=O)C5=CC(=C(C(=C5)O)O)O)OC(=O)C6=CC(=C(C(=C6)O)O)O	LEG9_HUMAN	5	2.636e-12	0.2881	0.5738	20.3379	LGALS9	Galectin-9
C1=C(C=C(C(=C1O)O)O)C(=O)OCC2C(C(C(C(O2)OC(=O)C3=CC(=C(C(=C3)O)O)O)OC(=O)C4=CC(=C(C(=C4)O)O)O)OC(=O)C5=CC(=C(C(=C5)O)O)O)OC(=O)C6=CC(=C(C(=C6)O)O)O	MCL1_HUMAN	5	0.089	1	1.8209	1.4001	MCL1	Induced myeloid leukemia cell differentiation protein Mcl-1
C1=C(C=C(C(=C1O)O)O)C(=O)OCC2C(C(C(C(O2)OC(=O)C3=CC(=C(C(=C3)O)O)O)OC(=O)C4=CC(=C(C(=C4)O)O)O)OC(=O)C5=CC(=C(C(=C5)O)O)O)OC(=O)C6=CC(=C(C(=C6)O)O)O	PAI1_HUMAN	5	1.277e-33	1	7.8347	58.6047	SERPINE1	Plasminogen activator inhibitor 1
C1=C(C=C(C(=C1O)O)O)C(=O)OCC2C(C(C(C(O2)OC(=O)C3=CC(=C(C(=C3)O)O)O)OC(=O)C4=CC(=C(C(=C4)O)O)O)OC(=O)C5=CC(=C(C(=C5)O)O)O)OC(=O)C6=CC(=C(C(=C6)O)O)O	PGAM1_HUMAN	5	1.242e-22	0.3621	0.3621	38.8782	PGAM1	Phosphoglycerate mutase 1
C1=C(C=C(C(=C1O)O)O)C(=O)OCC2C(C(C(C(O2)OC(=O)C3=CC(=C(C(=C3)O)O)O)OC(=O)C4=CC(=C(C(=C4)O)O)O)OC(=O)C5=CC(=C(C(=C5)O)O)O)OC(=O)C6=CC(=C(C(=C6)O)O)O	PTN1_HUMAN	5	0.01141	1	3.0164	3.0331	PTPN1	Tyrosine-protein phosphatase non-receptor type 1
C1=C(C=C(C(=C1O)O)O)C(=O)OCC2C(C(C(C(O2)OC(=O)C3=CC(=C(C(=C3)O)O)O)OC(=O)C4=CC(=C(C(=C4)O)O)O)OC(=O)C5=CC(=C(C(=C5)O)O)O)OC(=O)C6=CC(=C(C(=C6)O)O)O	PTN2_HUMAN	5	0.0005723	1	1.3462	5.3708	PTPN2	Tyrosine-protein phosphatase non-receptor type 2
C1=C(C=C(C(=C1O)O)O)C(=O)OCC2C(C(C(C(O2)OC(=O)C3=CC(=C(C(=C3)O)O)O)OC(=O)C4=CC(=C(C(=C4)O)O)O)OC(=O)C5=CC(=C(C(=C5)O)O)O)OC(=O)C6=CC(=C(C(=C6)O)O)O	SIAT6_HUMAN	5	2.924e-29	0.3621	0.3621	50.7775	ST3GAL3	CMP-N-acetylneuraminate-beta-1,4-galactoside alpha-2,3-sialyltransferase
C1=C(C=C(C(=C1O)O)O)C(=O)OCC2C(C(C(C(O2)OC(=O)C3=CC(=C(C(=C3)O)O)O)OC(=O)C4=CC(=C(C(=C4)O)O)O)OC(=O)C5=CC(=C(C(=C5)O)O)O)OC(=O)C6=CC(=C(C(=C6)O)O)O	TLR1_HUMAN	5	1.627e-37	0.2969	0.2969	65.5974	TLR1	Toll-like receptor 1
C1=C(C=C(C(=C1O)O)O)C(=O)OCC2C(C(C(C(O2)OC(=O)C3=CC(=C(C(=C3)O)O)O)OC(=O)C4=CC(=C(C(=C4)O)O)O)OC(=O)C5=CC(=C(C(=C5)O)O)O)OC(=O)C6=CC(=C(C(=C6)O)O)O	TYDP1_HUMAN	5	9.977e-08	0.4667	0.8846	12.1189	TDP1	Tyrosyl-DNA phosphodiesterase 1
C1C(C(C(CC1(C(=O)O)O)OC(=O)C=CC2=CC(=C(C=C2)O)O)O)OC(=O)C=CC3=CC(=C(C=C3)O)O	A4_HUMAN	5	4.064e-23	0.8444	15.6594	39.749	APP	Amyloid-beta precursor protein
C1C(C(C(CC1(C(=O)O)O)OC(=O)C=CC2=CC(=C(C=C2)O)O)O)OC(=O)C=CC3=CC(=C(C=C3)O)O	AK1BA_HUMAN	5	1.613e-26	1	3.8973	45.8557	AKR1B10	Aldo-keto reductase family 1 member B10
C1C(C(C(CC1(C(=O)O)O)OC(=O)C=CC2=CC(=C(C=C2)O)O)O)OC(=O)C=CC3=CC(=C(C=C3)O)O	AK1C4_HUMAN	5	2.391e-10	0.4364	0.4364	16.8233	AKR1C4	Aldo-keto reductase family 1 member C4
C1C(C(C(CC1(C(=O)O)O)OC(=O)C=CC2=CC(=C(C=C2)O)O)O)OC(=O)C=CC3=CC(=C(C=C3)O)O	ALDR_HUMAN	5	4.768e-10	1	5.3044	16.2854	AKR1B1	Aldo-keto reductase family 1 member B1
C1C(C(C(CC1(C(=O)O)O)OC(=O)C=CC2=CC(=C(C=C2)O)O)O)OC(=O)C=CC3=CC(=C(C=C3)O)O	CAH14_HUMAN	5	9.623e-10	0.4667	4.5799	15.7378	CA14	Carbonic anhydrase 14
C1C(C(C(CC1(C(=O)O)O)OC(=O)C=CC2=CC(=C(C=C2)O)O)O)OC(=O)C=CC3=CC(=C(C=C3)O)O	CAH3_HUMAN	5	1.16e-06	0.4667	0.7524	10.2062	CA3	Carbonic anhydrase 3
C1C(C(C(CC1(C(=O)O)O)OC(=O)C=CC2=CC(=C(C=C2)O)O)O)OC(=O)C=CC3=CC(=C(C=C3)O)O	CAH5B_HUMAN	5	1.003e-13	0.4667	3.3611	22.887	CA5B	Carbonic anhydrase 5B, mitochondrial
C1C(C(C(CC1(C(=O)O)O)OC(=O)C=CC2=CC(=C(C=C2)O)O)O)OC(=O)C=CC3=CC(=C(C=C3)O)O	CAH5A_HUMAN	5	1.168e-13	0.4667	3.9548	22.7679	CA5A	Carbonic anhydrase 5A, mitochondrial
C1C(C(C(CC1(C(=O)O)O)OC(=O)C=CC2=CC(=C(C=C2)O)O)O)OC(=O)C=CC3=CC(=C(C=C3)O)O	CAH6_HUMAN	5	9.992e-16	0.4667	4.0009	26.4913	CA6	Carbonic anhydrase 6
C1C(C(C(CC1(C(=O)O)O)OC(=O)C=CC2=CC(=C(C=C2)O)O)O)OC(=O)C=CC3=CC(=C(C=C3)O)O	CAH7_HUMAN	5	1.712e-10	0.4667	5.8124	17.0841	CA7	Carbonic anhydrase 7
C1C(C(C(CC1(C(=O)O)O)OC(=O)C=CC2=CC(=C(C=C2)O)O)O)OC(=O)C=CC3=CC(=C(C=C3)O)O	CBS_HUMAN	5	3.542e-11	0.3	0.3	18.3123	CBS	Cystathionine beta-synthase
C1C(C(C(CC1(C(=O)O)O)OC(=O)C=CC2=CC(=C(C=C2)O)O)O)OC(=O)C=CC3=CC(=C(C=C3)O)O	CH10_HUMAN	5	3.895e-09	0.3051	0.3051	14.6477	HSPE1	10 kDa heat shock protein, mitochondrial
C1C(C(C(CC1(C(=O)O)O)OC(=O)C=CC2=CC(=C(C=C2)O)O)O)OC(=O)C=CC3=CC(=C(C=C3)O)O	CH60_HUMAN	5	3.895e-09	0.3051	0.3051	14.6477	HSPD1	60 kDa heat shock protein, mitochondrial
C1C(C(C(CC1(C(=O)O)O)OC(=O)C=CC2=CC(=C(C=C2)O)O)O)OC(=O)C=CC3=CC(=C(C=C3)O)O	G6PT1_HUMAN	5	8.212e-12	0.4028	0.4028	19.4521	SLC37A4	Glucose-6-phosphate exchanger SLC37A4
C1C(C(C(CC1(C(=O)O)O)OC(=O)C=CC2=CC(=C(C=C2)O)O)O)OC(=O)C=CC3=CC(=C(C=C3)O)O	HYES_HUMAN	5	0.05813	1	2.1518	1.7451	EPHX2	Bifunctional epoxide hydrolase 2
C1C(C(C(CC1(C(=O)O)O)OC(=O)C=CC2=CC(=C(C=C2)O)O)O)OC(=O)C=CC3=CC(=C(C=C3)O)O	LGUL_HUMAN	5	3.014e-19	0.3617	1.868	32.8008	GLO1	Lactoylglutathione lyase
C1C(C(C(CC1(C(=O)O)O)OC(=O)C=CC2=CC(=C(C=C2)O)O)O)OC(=O)C=CC3=CC(=C(C=C3)O)O	MMP1_HUMAN	5	7.274e-06	0.4667	7.3694	8.7747	MMP1	Interstitial collagenase
C1C(C(C(CC1(C(=O)O)O)OC(=O)C=CC2=CC(=C(C=C2)O)O)O)OC(=O)C=CC3=CC(=C(C=C3)O)O	MMP2_HUMAN	5	9.369e-06	0.7917	9.0516	8.5774	MMP2	72 kDa type IV collagenase
C1C(C(C(CC1(C(=O)O)O)OC(=O)C=CC2=CC(=C(C=C2)O)O)O)OC(=O)C=CC3=CC(=C(C=C3)O)O	MMP9_HUMAN	5	5.032e-06	0.4667	7.6527	9.0621	MMP9	Matrix metalloproteinase-9
C1C(C(C(CC1(C(=O)O)O)OC(=O)C=CC2=CC(=C(C=C2)O)O)O)OC(=O)C=CC3=CC(=C(C=C3)O)O	MYOC_HUMAN	5	1.277e-31	0.3922	0.3922	55.014	MYOC	Myocilin
C1C(C(C(CC1(C(=O)O)O)OC(=O)C=CC2=CC(=C(C=C2)O)O)O)OC(=O)C=CC3=CC(=C(C=C3)O)O	NEMO_HUMAN	5	4.823e-06	0.2951	0.2951	9.0951	IKBKG	NF-kappa-B essential modulator
C1C(C(C(CC1(C(=O)O)O)OC(=O)C=CC2=CC(=C(C=C2)O)O)O)OC(=O)C=CC3=CC(=C(C=C3)O)O	NF2L2_HUMAN	5	5.668e-06	0.3396	0.6669	8.9692	NFE2L2	Nuclear factor erythroid 2-related factor 2
C1C(C(C(CC1(C(=O)O)O)OC(=O)C=CC2=CC(=C(C=C2)O)O)O)OC(=O)C=CC3=CC(=C(C=C3)O)O	NFKB1_HUMAN	5	8.438e-15	0.3273	1.235	24.8144	NFKB1	Nuclear factor NF-kappa-B p105 subunit
C1C(C(C(CC1(C(=O)O)O)OC(=O)C=CC2=CC(=C(C=C2)O)O)O)OC(=O)C=CC3=CC(=C(C=C3)O)O	NR0B2_HUMAN	5	4.974e-50	0.3538	0.9868	88.065	NR0B2	Nuclear receptor subfamily 0 group B member 2
C1C(C(C(CC1(C(=O)O)O)OC(=O)C=CC2=CC(=C(C=C2)O)O)O)OC(=O)C=CC3=CC(=C(C=C3)O)O	PTN11_HUMAN	5	2.419e-06	0.3538	2.1912	9.6333	PTPN11	Tyrosine-protein phosphatase non-receptor type 11
C1C(C(C(CC1(C(=O)O)O)OC(=O)C=CC2=CC(=C(C=C2)O)O)O)OC(=O)C=CC3=CC(=C(C=C3)O)O	RARA_HUMAN	5	8.579e-08	0.3621	1.862	12.2366	RARA	Retinoic acid receptor alpha
C1C(C(C(CC1(C(=O)O)O)OC(=O)C=CC2=CC(=C(C=C2)O)O)O)OC(=O)C=CC3=CC(=C(C=C3)O)O	RARB_HUMAN	5	9.18e-09	0.3729	2.5519	13.9792	RARB	Retinoic acid receptor beta
C1C(C(C(CC1(C(=O)O)O)OC(=O)C=CC2=CC(=C(C=C2)O)O)O)OC(=O)C=CC3=CC(=C(C=C3)O)O	SDF1_HUMAN	5	1.437e-76	0.3774	4.2117	135.711	CXCL12	Stromal cell-derived factor 1
C1C(C(C(CC1(C(=O)O)O)OC(=O)C=CC2=CC(=C(C=C2)O)O)O)OC(=O)C=CC3=CC(=C(C=C3)O)O	TAU_HUMAN	5	3.256e-18	0.3276	3.5808	30.9453	MAPT	Microtubule-associated protein tau
C1C(C(C(CC1(C(=O)O)O)OC(=O)C=CC2=CC(=C(C=C2)O)O)O)OC(=O)C=CC3=CC(=C(C=C3)O)O	TF65_HUMAN	5	6.648e-08	0.36	1.2598	12.4355	RELA	Transcription factor p65
C1C(C(C(CC1(C(=O)O)O)OC(=O)C=CC2=CC(=C(C=C2)O)O)O)OC(=O)C=CC3=CC(=C(C=C3)O)O	TTHY_HUMAN	5	1.495e-08	0.4364	1.1907	13.5987	TTR	Transthyretin
CC12CC3(C4CC1(C4(C(O2)O3)COC(=O)C5=CC=CC=C5)OC6C(C(C(C(O6)CO)O)O)O)O	CAH14_HUMAN	5	2.144e-06	0.337	2.9731	9.7273	CA14	Carbonic anhydrase 14
CC12CC3(C4CC1(C4(C(O2)O3)COC(=O)C5=CC=CC=C5)OC6C(C(C(C(O6)CO)O)O)O)O	CD22_HUMAN	5	3.94e-72	0.3143	4.4937	127.744	CD22	B-cell receptor CD22
CC12CC3(C4CC1(C4(C(O2)O3)COC(=O)C5=CC=CC=C5)OC6C(C(C(C(O6)CO)O)O)O)O	FGF1_HUMAN	5	3.831e-19	0.3415	0.6704	32.6137	FGF1	Fibroblast growth factor 1
CC12CC3(C4CC1(C4(C(O2)O3)COC(=O)C5=CC=CC=C5)OC6C(C(C(C(O6)CO)O)O)O)O	FGF2_HUMAN	5	1.665e-15	0.3415	0.6704	26.061	FGF2	Fibroblast growth factor 2
CC12CC3(C4CC1(C4(C(O2)O3)COC(=O)C5=CC=CC=C5)OC6C(C(C(C(O6)CO)O)O)O)O	LEG1_HUMAN	5	2.054e-11	0.3611	0.6538	18.7371	LGALS1	Galectin-1
CC12CC3(C4CC1(C4(C(O2)O3)COC(=O)C5=CC=CC=C5)OC6C(C(C(C(O6)CO)O)O)O)O	LEG3_HUMAN	5	1.11e-16	0.3611	1.8619	28.3699	LGALS3	Galectin-3
CC12CC3(C4CC1(C4(C(O2)O3)COC(=O)C5=CC=CC=C5)OC6C(C(C(C(O6)CO)O)O)O)O	LEG7_HUMAN	5	8.352e-08	0.2895	0.2895	12.2576	LGALS7; LGALS7B	Galectin-7
CC12CC3(C4CC1(C4(C(O2)O3)COC(=O)C5=CC=CC=C5)OC6C(C(C(C(O6)CO)O)O)O)O	LEG9_HUMAN	5	2.45e-32	0.3611	1.5681	56.3013	LGALS9	Galectin-9
CC12CC3(C4CC1(C4(C(O2)O3)COC(=O)C5=CC=CC=C5)OC6C(C(C(C(O6)CO)O)O)O)O	LYAM3_HUMAN	5	9.465e-06	0.3404	0.6657	8.5694	SELP	P-selectin
CC12CC3(C4CC1(C4(C(O2)O3)COC(=O)C5=CC=CC=C5)OC6C(C(C(C(O6)CO)O)O)O)O	MAG_HUMAN	5	7.615e-59	0.3302	2.3886	103.891	MAG	Myelin-associated glycoprotein
CC12CC3(C4CC1(C4(C(O2)O3)COC(=O)C5=CC=CC=C5)OC6C(C(C(C(O6)CO)O)O)O)O	MDR1_HUMAN	5	3.004e-10	0.3333	8.1287	16.6455	ABCB1	ATP-dependent translocase ABCB1
CC12CC3(C4CC1(C4(C(O2)O3)COC(=O)C5=CC=CC=C5)OC6C(C(C(C(O6)CO)O)O)O)O	SC5A1_HUMAN	5	8.882e-16	0.321	10.9202	26.5424	SLC5A1	Sodium/glucose cotransporter 1
CC12CC3(C4CC1(C4(C(O2)O3)COC(=O)C5=CC=CC=C5)OC6C(C(C(C(O6)CO)O)O)O)O	SC5A2_HUMAN	5	1.781e-13	0.3377	11.2316	22.439	SLC5A2	Sodium/glucose cotransporter 2
CC12CC3(C4CC1(C4(C(O2)O3)COC(=O)C5=CC=CC=C5)OC6C(C(C(C(O6)CO)O)O)O)O	SUIS_HUMAN	5	4.211e-06	0.2821	0.5641	9.201	SI	Sucrase-isomaltase, intestinal
CC12CC3(C4CC1(C4(C(O2)O3)COC(=O)C5=CC=CC=C5)OC6C(C(C(C(O6)CO)O)O)O)O	TF_HUMAN	5	2.255e-07	0.3548	2.872	11.4833	F3	Tissue factor
CC12CC3(C4CC1(C4(C(O2)O3)COC(=O)C5=CC=CC=C5)OC6C(C(C(C(O6)CO)O)O)O)O	TYRO_HUMAN	5	3.868e-06	0.284	0.5679	9.2671	TYR	Tyrosinase
CC12CC3(C4CC1(C4(C(O2)O3)COC(=O)C5=CC=CC=C5)OC6C(C(C(C(O6)CO)O)O)O)O	VEGFA_HUMAN	5	2.285e-11	0.3415	0.6704	18.654	VEGFA	Vascular endothelial growth factor A
O=C(OC)C1=CO[C@@H](O[C@@H]2O[C@H](CO[C@@H]3O[C@H](COC(C=CC4=CC=CC=C4)=O)[C@@H](O)C(O)[C@H]3O)[C@@H](O)C(O)[C@H]2O)[C@@]5([H])[C@@]1(CC=C5CO)[H]	AMYP_HUMAN	5	2.817e-20	0.3229	0.3229	34.6487	AMY2A	Pancreatic alpha-amylase
O=C(OC)C1=CO[C@@H](O[C@@H]2O[C@H](CO[C@@H]3O[C@H](COC(C=CC4=CC=CC=C4)=O)[C@@H](O)C(O)[C@H]3O)[C@@H](O)C(O)[C@H]2O)[C@@]5([H])[C@@]1(CC=C5CO)[H]	BIP_HUMAN	5	2.02e-07	0.2887	0.2887	11.5691	HSPA5	Endoplasmic reticulum chaperone BiP
O=C(OC)C1=CO[C@@H](O[C@@H]2O[C@H](CO[C@@H]3O[C@H](COC(C=CC4=CC=CC=C4)=O)[C@@H](O)C(O)[C@H]3O)[C@@H](O)C(O)[C@H]2O)[C@@]5([H])[C@@]1(CC=C5CO)[H]	FGF1_HUMAN	5	1.705e-17	0.3059	0.6102	29.6541	FGF1	Fibroblast growth factor 1
O=C(OC)C1=CO[C@@H](O[C@@H]2O[C@H](CO[C@@H]3O[C@H](COC(C=CC4=CC=CC=C4)=O)[C@@H](O)C(O)[C@H]3O)[C@@H](O)C(O)[C@H]2O)[C@@]5([H])[C@@]1(CC=C5CO)[H]	FGF2_HUMAN	5	3.597e-14	0.3059	0.6102	23.6857	FGF2	Fibroblast growth factor 2
O=C(OC)C1=CO[C@@H](O[C@@H]2O[C@H](CO[C@@H]3O[C@H](COC(C=CC4=CC=CC=C4)=O)[C@@H](O)C(O)[C@H]3O)[C@@H](O)C(O)[C@H]2O)[C@@]5([H])[C@@]1(CC=C5CO)[H]	IL2_HUMAN	5	1.815e-07	0.4	0.4	11.6524	IL2	Interleukin-2
O=C(OC)C1=CO[C@@H](O[C@@H]2O[C@H](CO[C@@H]3O[C@H](COC(C=CC4=CC=CC=C4)=O)[C@@H](O)C(O)[C@H]3O)[C@@H](O)C(O)[C@H]2O)[C@@]5([H])[C@@]1(CC=C5CO)[H]	LEG9_HUMAN	5	4.283e-07	0.3152	0.3152	10.983	LGALS9	Galectin-9
O=C(OC)C1=CO[C@@H](O[C@@H]2O[C@H](CO[C@@H]3O[C@H](COC(C=CC4=CC=CC=C4)=O)[C@@H](O)C(O)[C@H]3O)[C@@H](O)C(O)[C@H]2O)[C@@]5([H])[C@@]1(CC=C5CO)[H]	VEGFA_HUMAN	5	2.067e-10	0.3059	0.6102	16.9369	VEGFA	Vascular endothelial growth factor A
C[C@@]1(C(O)=O)CC(C([C@@]2(C)CC3)=CC(C([C@](CC[C@H](O[C@@H]4O[C@H](C(O)=O)[C@@H](O)C(O)[C@H]4O[C@@H]5O[C@H](C(O)=O)[C@@H](O)C(O)[C@H]5O)C6(C)C)(C)C6CC7)[C@]27C)=O)[C@]3(C)C(OC(C)=O)C1	AK1BA_HUMAN	5	8.468e-10	0.4767	1.3872	15.8375	AKR1B10	Aldo-keto reductase family 1 member B10
C[C@@]1(C(O)=O)CC(C([C@@]2(C)CC3)=CC(C([C@](CC[C@H](O[C@@H]4O[C@H](C(O)=O)[C@@H](O)C(O)[C@H]4O[C@@H]5O[C@H](C(O)=O)[C@@H](O)C(O)[C@H]5O)C6(C)C)(C)C6CC7)[C@]27C)=O)[C@]3(C)C(OC(C)=O)C1	CD81_HUMAN	5	7.142e-37	0.2917	0.2917	64.4438	CD81	CD81 antigen
C[C@@]1(C(O)=O)CC(C([C@@]2(C)CC3)=CC(C([C@](CC[C@H](O[C@@H]4O[C@H](C(O)=O)[C@@H](O)C(O)[C@H]4O[C@@H]5O[C@H](C(O)=O)[C@@H](O)C(O)[C@H]5O)C6(C)C)(C)C6CC7)[C@]27C)=O)[C@]3(C)C(OC(C)=O)C1	DHI1_HUMAN	5	9.189e-09	0.7927	12.5521	13.9785	HSD11B1	Corticosteroid 11-beta-dehydrogenase isozyme 1
C[C@@]1(C(O)=O)CC(C([C@@]2(C)CC3)=CC(C([C@](CC[C@H](O[C@@H]4O[C@H](C(O)=O)[C@@H](O)C(O)[C@H]4O[C@@H]5O[C@H](C(O)=O)[C@@H](O)C(O)[C@H]5O)C6(C)C)(C)C6CC7)[C@]27C)=O)[C@]3(C)C(OC(C)=O)C1	DHI2_HUMAN	5	1.311e-70	0.7927	10.674	125.011	HSD11B2	Corticosteroid 11-beta-dehydrogenase isozyme 2
C[C@@]1(C(O)=O)CC(C([C@@]2(C)CC3)=CC(C([C@](CC[C@H](O[C@@H]4O[C@H](C(O)=O)[C@@H](O)C(O)[C@H]4O[C@@H]5O[C@H](C(O)=O)[C@@H](O)C(O)[C@H]5O)C6(C)C)(C)C6CC7)[C@]27C)=O)[C@]3(C)C(OC(C)=O)C1	EST2_HUMAN	5	4.414e-19	0.5287	3.6646	32.5033	CES2	Cocaine esterase
C[C@@]1(C(O)=O)CC(C([C@@]2(C)CC3)=CC(C([C@](CC[C@H](O[C@@H]4O[C@H](C(O)=O)[C@@H](O)C(O)[C@H]4O[C@@H]5O[C@H](C(O)=O)[C@@H](O)C(O)[C@H]5O)C6(C)C)(C)C6CC7)[C@]27C)=O)[C@]3(C)C(OC(C)=O)C1	PIN1_HUMAN	5	4.042e-10	0.4455	1.9363	16.4142	PIN1	Peptidyl-prolyl cis-trans isomerase NIMA-interacting 1
C[C@@]1(C(O)=O)CC(C([C@@]2(C)CC3)=CC(C([C@](CC[C@H](O[C@@H]4O[C@H](C(O)=O)[C@@H](O)C(O)[C@H]4O[C@@H]5O[C@H](C(O)=O)[C@@H](O)C(O)[C@H]5O)C6(C)C)(C)C6CC7)[C@]27C)=O)[C@]3(C)C(OC(C)=O)C1	PTN1_HUMAN	5	1.167e-12	0.4519	13.5331	20.9733	PTPN1	Tyrosine-protein phosphatase non-receptor type 1
C[C@@]1(C(O)=O)CC(C([C@@]2(C)CC3)=CC(C([C@](CC[C@H](O[C@@H]4O[C@H](C(O)=O)[C@@H](O)C(O)[C@H]4O[C@@H]5O[C@H](C(O)=O)[C@@H](O)C(O)[C@H]5O)C6(C)C)(C)C6CC7)[C@]27C)=O)[C@]3(C)C(OC(C)=O)C1	PTN2_HUMAN	5	2.365e-14	0.3729	5.1605	24.015	PTPN2	Tyrosine-protein phosphatase non-receptor type 2
C[C@@]1(C(O)=O)CC(C([C@@]2(C)CC3)=CC(C([C@](CC[C@H](O[C@@H]4O[C@H](C(O)=O)[C@@H](O)C(O)[C@H]4O[C@@H]5O[C@H](C(O)=O)[C@@H](O)C(O)[C@H]5O)C6(C)C)(C)C6CC7)[C@]27C)=O)[C@]3(C)C(OC(C)=O)C1	SO1B1_HUMAN	5	4.575e-07	0.3267	0.3267	10.9315	SLCO1B1	Solute carrier organic anion transporter family member 1B1
C[C@@]1(C(O)=O)CC(C([C@@]2(C)CC3)=CC(C([C@](CC[C@H](O[C@@H]4O[C@H](C(O)=O)[C@@H](O)C(O)[C@H]4O[C@@H]5O[C@H](C(O)=O)[C@@H](O)C(O)[C@H]5O)C6(C)C)(C)C6CC7)[C@]27C)=O)[C@]3(C)C(OC(C)=O)C1	T2R31_HUMAN	5	3.22e-15	0.2887	0.2887	25.5786	TAS2R31	Taste receptor type 2 member 31
C[C@@]1(C(O)=O)CC(C([C@@]2(C)CC3)=CC(C([C@](CC[C@H](O[C@@H]4O[C@H](C(O)=O)[C@@H](O)C(O)[C@H]4O[C@@H]5O[C@H](C(O)=O)[C@@H](O)C(O)[C@H]5O)C6(C)C)(C)C6CC7)[C@]27C)=O)[C@]3(C)C(OC(C)=O)C1	TF_HUMAN	5	1.194e-11	0.4388	4.6005	19.1603	F3	Tissue factor
OC[C@H]1O[C@@H](OC[C@@H]2[C@@H](O)[C@H](O)[C@@H](O)[C@H](OC(/C(C)=C/C=C/C(C)=C/C=C/C=C(/C=C/C=C(C(O)=O)\C)C)=O)O2)[C@H](O)[C@@H](O)[C@@H]1O	AMYP_HUMAN	5	1.194e-20	0.3291	0.3291	35.3182	AMY2A	Pancreatic alpha-amylase
OC[C@H]1O[C@@H](OC[C@@H]2[C@@H](O)[C@H](O)[C@@H](O)[C@H](OC(/C(C)=C/C=C/C(C)=C/C=C/C=C(/C=C/C=C(C(O)=O)\C)C)=O)O2)[C@H](O)[C@@H](O)[C@@H]1O	BGAL_HUMAN	5	5.475e-07	0.2969	0.2969	10.7915	GLB1	Beta-galactosidase
OC[C@H]1O[C@@H](OC[C@@H]2[C@@H](O)[C@H](O)[C@@H](O)[C@H](OC(/C(C)=C/C=C/C(C)=C/C=C/C=C(/C=C/C=C(C(O)=O)\C)C)=O)O2)[C@H](O)[C@@H](O)[C@@H]1O	CD69_HUMAN	5	4.441e-15	0.3731	0.3731	25.3254	CD69	Early activation antigen CD69
OC[C@H]1O[C@@H](OC[C@@H]2[C@@H](O)[C@H](O)[C@@H](O)[C@H](OC(/C(C)=C/C=C/C(C)=C/C=C/C=C(/C=C/C=C(C(O)=O)\C)C)=O)O2)[C@H](O)[C@@H](O)[C@@H]1O	FGF1_HUMAN	5	7.97e-25	0.2985	0.8778	42.8145	FGF1	Fibroblast growth factor 1
OC[C@H]1O[C@@H](OC[C@@H]2[C@@H](O)[C@H](O)[C@@H](O)[C@H](OC(/C(C)=C/C=C/C(C)=C/C=C/C=C(/C=C/C=C(C(O)=O)\C)C)=O)O2)[C@H](O)[C@@H](O)[C@@H]1O	FGF2_HUMAN	5	4.71e-20	0.2985	0.8778	34.248	FGF2	Fibroblast growth factor 2
OC[C@H]1O[C@@H](OC[C@@H]2[C@@H](O)[C@H](O)[C@@H](O)[C@H](OC(/C(C)=C/C=C/C(C)=C/C=C/C=C(/C=C/C=C(C(O)=O)\C)C)=O)O2)[C@H](O)[C@@H](O)[C@@H]1O	IL2_HUMAN	5	2.63e-10	0.2857	0.5683	16.7493	IL2	Interleukin-2
OC[C@H]1O[C@@H](OC[C@@H]2[C@@H](O)[C@H](O)[C@@H](O)[C@H](OC(/C(C)=C/C=C/C(C)=C/C=C/C=C(/C=C/C=C(C(O)=O)\C)C)=O)O2)[C@H](O)[C@@H](O)[C@@H]1O	LEG3_HUMAN	5	1.11e-16	0.3333	1.849	28.1686	LGALS3	Galectin-3
OC[C@H]1O[C@@H](OC[C@@H]2[C@@H](O)[C@H](O)[C@@H](O)[C@H](OC(/C(C)=C/C=C/C(C)=C/C=C/C=C(/C=C/C=C(C(O)=O)\C)C)=O)O2)[C@H](O)[C@@H](O)[C@@H]1O	LEG4_HUMAN	5	4.354e-58	0.3333	0.9513	102.531	LGALS4	Galectin-4
OC[C@H]1O[C@@H](OC[C@@H]2[C@@H](O)[C@H](O)[C@@H](O)[C@H](OC(/C(C)=C/C=C/C(C)=C/C=C/C=C(/C=C/C=C(C(O)=O)\C)C)=O)O2)[C@H](O)[C@@H](O)[C@@H]1O	LEG8_HUMAN	5	4.354e-58	0.3333	0.9513	102.531	LGALS8	Galectin-8
OC[C@H]1O[C@@H](OC[C@@H]2[C@@H](O)[C@H](O)[C@@H](O)[C@H](OC(/C(C)=C/C=C/C(C)=C/C=C/C=C(/C=C/C=C(C(O)=O)\C)C)=O)O2)[C@H](O)[C@@H](O)[C@@H]1O	LEG9_HUMAN	5	6.637e-13	0.32	0.6036	21.4134	LGALS9	Galectin-9
OC[C@H]1O[C@@H](OC[C@@H]2[C@@H](O)[C@H](O)[C@@H](O)[C@H](OC(/C(C)=C/C=C/C(C)=C/C=C/C=C(/C=C/C=C(C(O)=O)\C)C)=O)O2)[C@H](O)[C@@H](O)[C@@H]1O	LYAM1_HUMAN	5	1.42e-17	0.2963	1.1792	29.7967	SELL	L-selectin
OC[C@H]1O[C@@H](OC[C@@H]2[C@@H](O)[C@H](O)[C@@H](O)[C@H](OC(/C(C)=C/C=C/C(C)=C/C=C/C=C(/C=C/C=C(C(O)=O)\C)C)=O)O2)[C@H](O)[C@@H](O)[C@@H]1O	LYAM3_HUMAN	5	6.59e-12	0.2963	1.4601	19.6236	SELP	P-selectin
OC[C@H]1O[C@@H](OC[C@@H]2[C@@H](O)[C@H](O)[C@@H](O)[C@H](OC(/C(C)=C/C=C/C(C)=C/C=C/C=C(/C=C/C=C(C(O)=O)\C)C)=O)O2)[C@H](O)[C@@H](O)[C@@H]1O	MPRI_HUMAN	5	2.825e-58	0.3333	1.3333	102.869	IGF2R	Cation-independent mannose-6-phosphate receptor
OC[C@H]1O[C@@H](OC[C@@H]2[C@@H](O)[C@H](O)[C@@H](O)[C@H](OC(/C(C)=C/C=C/C(C)=C/C=C/C=C(/C=C/C=C(C(O)=O)\C)C)=O)O2)[C@H](O)[C@@H](O)[C@@H]1O	SC5A2_HUMAN	5	4.726e-08	0.3165	6.7312	12.7016	SLC5A2	Sodium/glucose cotransporter 2
OC[C@H]1O[C@@H](OC[C@@H]2[C@@H](O)[C@H](O)[C@@H](O)[C@H](OC(/C(C)=C/C=C/C(C)=C/C=C/C=C(/C=C/C=C(C(O)=O)\C)C)=O)O2)[C@H](O)[C@@H](O)[C@@H]1O	VEGFA_HUMAN	5	1.155e-14	0.2985	0.8778	24.5724	VEGFA	Vascular endothelial growth factor A
CC(CC(C(C(C)(C)O)O)O)C1=C2CC(C3C4(CCC(=O)C(C4CCC3(C2(CC1=O)C)C)(C)C)C)O	DHI2_HUMAN	5	1.692e-06	0.3103	0.9056	9.9117	HSD11B2	Corticosteroid 11-beta-dehydrogenase isozyme 2
CC(CC(C(C(C)(C)O)O)O)C1=C2CC(C3C4(CCC(=O)C(C4CCC3(C2(CC1=O)C)C)(C)C)C)O	EST2_HUMAN	5	1.263e-13	0.6133	2.5889	22.707	CES2	Cocaine esterase
CC1(C2CCC3(C(C2(CCC1OC4C(C(C(C(O4)C(=O)O)O)O)OC5C(C(C(C(O5)C(=O)O)O)O)O)C)C(=O)C=C6C3(CCC7(C6CC(CC7)(C)C(=O)O)C)C)C)C	AK1BA_HUMAN	5	3.927e-11	0.6267	1.5875	18.232	AKR1B10	Aldo-keto reductase family 1 member B10
CC1(C2CCC3(C(C2(CCC1OC4C(C(C(C(O4)C(=O)O)O)O)OC5C(C(C(C(O5)C(=O)O)O)O)O)C)C(=O)C=C6C3(CCC7(C6CC(CC7)(C)C(=O)O)C)C)C)C	CD81_HUMAN	5	7.528e-39	0.3077	0.3077	67.9935	CD81	CD81 antigen
CC1(C2CCC3(C(C2(CCC1OC4C(C(C(C(O4)C(=O)O)O)O)OC5C(C(C(C(O5)C(=O)O)O)O)O)C)C(=O)C=C6C3(CCC7(C6CC(CC7)(C)C(=O)O)C)C)C)C	DHI1_HUMAN	5	1.44e-09	1	13.6575	15.4236	HSD11B1	Corticosteroid 11-beta-dehydrogenase isozyme 1
CC1(C2CCC3(C(C2(CCC1OC4C(C(C(C(O4)C(=O)O)O)O)OC5C(C(C(C(O5)C(=O)O)O)O)O)C)C(=O)C=C6C3(CCC7(C6CC(CC7)(C)C(=O)O)C)C)C)C	DHI2_HUMAN	5	6.737e-83	1	12.5465	147.074	HSD11B2	Corticosteroid 11-beta-dehydrogenase isozyme 2
CC1(C2CCC3(C(C2(CCC1OC4C(C(C(C(O4)C(=O)O)O)O)OC5C(C(C(C(O5)C(=O)O)O)O)O)C)C(=O)C=C6C3(CCC7(C6CC(CC7)(C)C(=O)O)C)C)C)C	DPOLB_HUMAN	5	8.881e-06	0.3371	0.3371	8.6191	POLB	DNA polymerase beta
CC1(C2CCC3(C(C2(CCC1OC4C(C(C(C(O4)C(=O)O)O)O)OC5C(C(C(C(O5)C(=O)O)O)O)O)C)C(=O)C=C6C3(CCC7(C6CC(CC7)(C)C(=O)O)C)C)C)C	EST2_HUMAN	5	8.392e-23	0.561	4.3982	39.1836	CES2	Cocaine esterase
CC1(C2CCC3(C(C2(CCC1OC4C(C(C(C(O4)C(=O)O)O)O)OC5C(C(C(C(O5)C(=O)O)O)O)O)C)C(=O)C=C6C3(CCC7(C6CC(CC7)(C)C(=O)O)C)C)C)C	PIN1_HUMAN	5	1.848e-12	0.4667	2.4067	20.615	PIN1	Peptidyl-prolyl cis-trans isomerase NIMA-interacting 1
CC1(C2CCC3(C(C2(CCC1OC4C(C(C(C(O4)C(=O)O)O)O)OC5C(C(C(C(O5)C(=O)O)O)O)O)C)C(=O)C=C6C3(CCC7(C6CC(CC7)(C)C(=O)O)C)C)C)C	PPAC_HUMAN	5	8.035e-06	0.3434	0.6413	8.6971	ACP1	Low molecular weight phosphotyrosine protein phosphatase
CC1(C2CCC3(C(C2(CCC1OC4C(C(C(C(O4)C(=O)O)O)O)OC5C(C(C(C(O5)C(=O)O)O)O)O)C)C(=O)C=C6C3(CCC7(C6CC(CC7)(C)C(=O)O)C)C)C)C	PTN1_HUMAN	5	8.415e-18	0.4747	18.9447	30.2049	PTPN1	Tyrosine-protein phosphatase non-receptor type 1
CC1(C2CCC3(C(C2(CCC1OC4C(C(C(C(O4)C(=O)O)O)O)OC5C(C(C(C(O5)C(=O)O)O)O)O)C)C(=O)C=C6C3(CCC7(C6CC(CC7)(C)C(=O)O)C)C)C)C	PTN2_HUMAN	5	3.763e-21	0.4045	7.6571	36.2184	PTPN2	Tyrosine-protein phosphatase non-receptor type 2
CC1(C2CCC3(C(C2(CCC1OC4C(C(C(C(O4)C(=O)O)O)O)OC5C(C(C(C(O5)C(=O)O)O)O)O)C)C(=O)C=C6C3(CCC7(C6CC(CC7)(C)C(=O)O)C)C)C)C	RGS17_HUMAN	5	9.052e-19	0.2979	0.2979	31.9433	RGS17	Regulator of G-protein signaling 17
CC1(C2CCC3(C(C2(CCC1OC4C(C(C(C(O4)C(=O)O)O)O)OC5C(C(C(C(O5)C(=O)O)O)O)O)C)C(=O)C=C6C3(CCC7(C6CC(CC7)(C)C(=O)O)C)C)C)C	SO1B1_HUMAN	5	2.142e-07	0.3438	0.3438	11.5231	SLCO1B1	Solute carrier organic anion transporter family member 1B1
CC1(C2CCC3(C(C2(CCC1OC4C(C(C(C(O4)C(=O)O)O)O)OC5C(C(C(C(O5)C(=O)O)O)O)O)C)C(=O)C=C6C3(CCC7(C6CC(CC7)(C)C(=O)O)C)C)C)C	TF_HUMAN	5	1.176e-12	0.4624	5.0074	20.9674	F3	Tissue factor
O[C@H]([C@@H](O)[C@H](O[C@H]1[C@@H](O)[C@@H](C)O[C@@H](O[C@@H]2[C@@](C(CC[C@]3(C)C4C=CC5(OC6)[C@@]3(C)C[C@H](O)C76C5CC(C)(C)CC7)[C@]4(C)CC2)(C)CO)[C@@H]1O)O8)[C@H](O)[C@H]8COC(C)=O	TF_HUMAN	5	3.001e-10	0.3832	4.0345	16.6462	F3	Tissue factor
O=C1CC[C@@]2(C)C(CC[C@@]([C@](C3)(C)C(C[C@@H]4O)=C([C@H](C)C[C@@H]([C@@H](OC(C)=O)C(C)(O)C)O)C3=O)(C)[C@]24[H])C1(C)C	EST2_HUMAN	5	5.338e-12	0.5488	2.2684	19.7879	CES2	Cocaine esterase
O[C@@H](C(C)(O)C)[C@@H](OC(C)=O)C[C@@H](C)C1=C(C[C@@H]2O)[C@@](CC1=O)(C)[C@@]([C@]32[H])(C)CCC4C(C)(C)C(CC[C@@]43C)=O	EST2_HUMAN	5	1.183e-11	0.5301	2.2003	19.1675	CES2	Cocaine esterase
CC1=CC2=C(C(=C1O)OC)C(=O)C3=C(C(=C(C=C3C2=O)O)OC)O	ACLY_HUMAN	5	2.31e-11	0.4222	1.0613	18.6455	ACLY	ATP-citrate synthase
CC1=CC2=C(C(=C1O)OC)C(=O)C3=C(C(=C(C=C3C2=O)O)OC)O	B2LA1_HUMAN	5	9.916e-24	0.3333	2.3825	40.8489	BCL2A1	Bcl-2-related protein A1
CC1=CC2=C(C(=C1O)OC)C(=O)C3=C(C(=C(C=C3C2=O)O)OC)O	CREB1_HUMAN	5	1.11e-16	0.3148	0.3148	27.9197	CREB1	Cyclic AMP-responsive element-binding protein 1
CC1=CC2=C(C(=C1O)OC)C(=O)C3=C(C(=C(C=C3C2=O)O)OC)O	FTO_HUMAN	5	9.7e-12	0.2857	0.2857	19.3222	FTO	Alpha-ketoglutarate-dependent dioxygenase FTO
CC1=CC2=C(C(=C1O)OC)C(=O)C3=C(C(=C(C=C3C2=O)O)OC)O	FUT7_HUMAN	5	3.922e-13	0.2857	0.2857	21.8235	FUT7	Alpha-(1,3)-fucosyltransferase 7
CC1=CC2=C(C(=C1O)OC)C(=O)C3=C(C(=C(C=C3C2=O)O)OC)O	G6PT1_HUMAN	5	1.11e-16	0.2951	0.583	28.3131	SLC37A4	Glucose-6-phosphate exchanger SLC37A4
CC1=CC2=C(C(=C1O)OC)C(=O)C3=C(C(=C(C=C3C2=O)O)OC)O	IL6_HUMAN	5	3.76e-09	0.3636	0.3636	14.6753	IL6	Interleukin-6
CC1=CC2=C(C(=C1O)OC)C(=O)C3=C(C(=C(C=C3C2=O)O)OC)O	ITF2_HUMAN	5	6.784e-12	0.3208	0.3208	19.601	TCF4	Transcription factor 4
CC1=CC2=C(C(=C1O)OC)C(=O)C3=C(C(=C(C=C3C2=O)O)OC)O	KCNB1_HUMAN	5	8.615e-25	0.3051	0.3051	42.7538	KCNB1	Potassium voltage-gated channel subfamily B member 1
CC1=CC2=C(C(=C1O)OC)C(=O)C3=C(C(=C(C=C3C2=O)O)OC)O	PGAM1_HUMAN	5	2.139e-18	0.2917	0.2917	31.2729	PGAM1	Phosphoglycerate mutase 1
CC1=CC2=C(C(=C1O)OC)C(=O)C3=C(C(=C(C=C3C2=O)O)OC)O	PTPRS_HUMAN	5	2.134e-06	0.3036	0.3036	9.7308	PTPRS	Receptor-type tyrosine-protein phosphatase S
CC1=CC2=C(C(=C1O)OC)C(=O)C3=C(C(=C(C=C3C2=O)O)OC)O	TP4A3_HUMAN	5	1.125e-07	0.3721	0.3721	12.0256	PTP4A3	Protein tyrosine phosphatase type IVA 3
CC1=CC2=C(C(=C1O)OC)C(=O)C3=C(C(=C(C=C3C2=O)O)OC)O	TPMT_HUMAN	5	7.636e-37	0.3333	0.942	64.3917	TPMT	Thiopurine S-methyltransferase
CC1C(C(C(C(O1)OC2CCC3(C(C2(C)CO)CCC4(C3C=CC56C4(CC(C7(C5CC(CC7)(C)C)CO6)O)C)C)C)O)OC8C(C(C(C(O8)CO)O)O)O)O	AMYP_HUMAN	5	1.795e-18	0.2929	0.2929	31.4093	AMY2A	Pancreatic alpha-amylase
CC1C(C(C(C(O1)OC2CCC3(C(C2(C)CO)CCC4(C3C=CC56C4(CC(C7(C5CC(CC7)(C)C)CO6)O)C)C)C)O)OC8C(C(C(C(O8)CO)O)O)O)O	FGF1_HUMAN	5	3.236e-17	0.3034	0.6001	29.1547	FGF1	Fibroblast growth factor 1
CC1C(C(C(C(O1)OC2CCC3(C(C2(C)CO)CCC4(C3C=CC56C4(CC(C7(C5CC(CC7)(C)C)CO6)O)C)C)C)O)OC8C(C(C(C(O8)CO)O)O)O)O	FGF2_HUMAN	5	6.017e-14	0.3034	0.6001	23.2849	FGF2	Fibroblast growth factor 2
CC1C(C(C(C(O1)OC2CCC3(C(C2(C)CO)CCC4(C3C=CC56C4(CC(C7(C5CC(CC7)(C)C)CO6)O)C)C)C)O)OC8C(C(C(C(O8)CO)O)O)O)O	TF_HUMAN	5	9.725e-12	0.42	4.6365	19.3202	F3	Tissue factor
CC1C(C(C(C(O1)OC2CCC3(C(C2(C)CO)CCC4(C3C=CC56C4(CC(C7(C5CC(CC7)(C)C)CO6)O)C)C)C)O)OC8C(C(C(C(O8)CO)O)O)O)O	VEGFA_HUMAN	5	2.998e-10	0.3034	0.6001	16.6471	VEGFA	Vascular endothelial growth factor A
CC1C(C(C(C(O1)OC2C(C(OC(C2O)OC3CCC4(C(C3(C)CO)CCC5(C4C=CC67C5(CC(C8(C6CC(CC8)(C)C)CO7)O)C)C)C)CO)O)O)O)O	FGF1_HUMAN	5	3.236e-17	0.3034	0.6001	29.1547	FGF1	Fibroblast growth factor 1
CC1C(C(C(C(O1)OC2C(C(OC(C2O)OC3CCC4(C(C3(C)CO)CCC5(C4C=CC67C5(CC(C8(C6CC(CC8)(C)C)CO7)O)C)C)C)CO)O)O)O)O	FGF2_HUMAN	5	6.017e-14	0.3034	0.6001	23.2849	FGF2	Fibroblast growth factor 2
CC1C(C(C(C(O1)OC2C(C(OC(C2O)OC3CCC4(C(C3(C)CO)CCC5(C4C=CC67C5(CC(C8(C6CC(CC8)(C)C)CO7)O)C)C)C)CO)O)O)O)O	TF_HUMAN	5	1.075e-10	0.4059	4.2147	17.4465	F3	Tissue factor
CC1C(C(C(C(O1)OC2C(C(OC(C2O)OC3CCC4(C(C3(C)CO)CCC5(C4C=CC67C5(CC(C8(C6CC(CC8)(C)C)CO7)O)C)C)C)CO)O)O)O)O	VEGFA_HUMAN	5	2.998e-10	0.3034	0.6001	16.6471	VEGFA	Vascular endothelial growth factor A
O[C@H]1[C@H](O)[C@@H](COC(C)=O)O[C@@H](O[C@H]2[C@@H](O)[C@@H](C)O[C@@H](O[C@@H]3[C@@](C)(CO)C(CC[C@]4(C)C5C=CC6(OC7)[C@@]4(C)C[C@@H](O)C87C6CC(C)(C)CC8)[C@]5(C)CC3)[C@@H]2O)[C@@H]1O	TF_HUMAN	5	3.001e-10	0.3832	4.0345	16.6462	F3	Tissue factor
C1=CC(=CC=C1C2=C(C(=O)C3=C(C=C(C=C3O2)O)O)OC4C(C(C(C(O4)CO)O)O)O)O	3MG_HUMAN	5	7.967e-22	0.4211	0.4211	37.4289	MPG	DNA-3-methyladenine glycosylase
C1=CC(=CC=C1C2=C(C(=O)C3=C(C=C(C=C3O2)O)O)OC4C(C(C(C(O4)CO)O)O)O)O	ABCG2_HUMAN	5	1.132e-11	0.4237	5.5925	19.2016	ABCG2	Broad substrate specificity ATP-binding cassette transporter ABCG2
C1=CC(=CC=C1C2=C(C(=O)C3=C(C=C(C=C3O2)O)O)OC4C(C(C(C(O4)CO)O)O)O)O	ACES_HUMAN	5	0.02643	1	4.0382	2.3725	ACHE	Acetylcholinesterase
C1=CC(=CC=C1C2=C(C(=O)C3=C(C=C(C=C3O2)O)O)OC4C(C(C(C(O4)CO)O)O)O)O	AL1A2_HUMAN	5	1.11e-16	0.5385	0.5385	28.0253	ALDH1A2	Retinal dehydrogenase 2
C1=CC(=CC=C1C2=C(C(=O)C3=C(C=C(C=C3O2)O)O)OC4C(C(C(C(O4)CO)O)O)O)O	AL1B1_HUMAN	5	7.362e-18	0.5385	0.5385	30.3091	ALDH1B1	Aldehyde dehydrogenase X, mitochondrial
C1=CC(=CC=C1C2=C(C(=O)C3=C(C=C(C=C3O2)O)O)OC4C(C(C(C(O4)CO)O)O)O)O	ALDH2_HUMAN	5	4.759e-30	0.5385	5.5915	52.1932	ALDH2	Aldehyde dehydrogenase, mitochondrial
C1=CC(=CC=C1C2=C(C(=O)C3=C(C=C(C=C3O2)O)O)OC4C(C(C(C(O4)CO)O)O)O)O	ALDR_HUMAN	5	9.269e-13	0.8545	6.758	21.153	AKR1B1	Aldo-keto reductase family 1 member B1
C1=CC(=CC=C1C2=C(C(=O)C3=C(C=C(C=C3O2)O)O)OC4C(C(C(C(O4)CO)O)O)O)O	AMY1A_HUMAN	5	6.661e-16	0.3016	0.3016	26.7357	AMY1A	Alpha-amylase 1
C1=CC(=CC=C1C2=C(C(=O)C3=C(C=C(C=C3O2)O)O)OC4C(C(C(C(O4)CO)O)O)O)O	AOFA_HUMAN	5	2.626e-06	0.431	5.1917	9.5691	MAOA	Amine oxidase [flavin-containing] A
C1=CC(=CC=C1C2=C(C(=O)C3=C(C=C(C=C3O2)O)O)OC4C(C(C(C(O4)CO)O)O)O)O	B4GT1_HUMAN	5	3.809e-18	0.2875	0.2875	30.8228	B4GALT1	Beta-1,4-galactosyltransferase 1
C1=CC(=CC=C1C2=C(C(=O)C3=C(C=C(C=C3O2)O)O)OC4C(C(C(C(O4)CO)O)O)O)O	CAH13_HUMAN	5	2.581e-08	0.4627	2.0078	13.1733	CA13	Carbonic anhydrase 13
C1=CC(=CC=C1C2=C(C(=O)C3=C(C=C(C=C3O2)O)O)OC4C(C(C(C(O4)CO)O)O)O)O	CAH14_HUMAN	5	4.83e-08	0.4237	3.7637	12.6846	CA14	Carbonic anhydrase 14
C1=CC(=CC=C1C2=C(C(=O)C3=C(C=C(C=C3O2)O)O)OC4C(C(C(C(O4)CO)O)O)O)O	CAH12_HUMAN	5	7.219e-13	1	17.6641	21.3479	CA12	Carbonic anhydrase 12
C1=CC(=CC=C1C2=C(C(=O)C3=C(C=C(C=C3O2)O)O)OC4C(C(C(C(O4)CO)O)O)O)O	CAH1_HUMAN	5	5.434e-06	0.4627	12.1982	9.0021	CA1	Carbonic anhydrase 1
C1=CC(=CC=C1C2=C(C(=O)C3=C(C=C(C=C3O2)O)O)OC4C(C(C(C(O4)CO)O)O)O)O	CAH3_HUMAN	5	3.921e-07	0.4237	0.8108	11.0518	CA3	Carbonic anhydrase 3
C1=CC(=CC=C1C2=C(C(=O)C3=C(C=C(C=C3O2)O)O)OC4C(C(C(C(O4)CO)O)O)O)O	CAH2_HUMAN	5	6.961e-06	1	13.8057	8.809	CA2	Carbonic anhydrase 2
C1=CC(=CC=C1C2=C(C(=O)C3=C(C=C(C=C3O2)O)O)OC4C(C(C(C(O4)CO)O)O)O)O	CAH5A_HUMAN	5	7.676e-07	0.4237	1.9252	10.5281	CA5A	Carbonic anhydrase 5A, mitochondrial
C1=CC(=CC=C1C2=C(C(=O)C3=C(C=C(C=C3O2)O)O)OC4C(C(C(C(O4)CO)O)O)O)O	CAH4_HUMAN	5	2.45e-17	1	7.7478	29.3715	CA4	Carbonic anhydrase 4
C1=CC(=CC=C1C2=C(C(=O)C3=C(C=C(C=C3O2)O)O)OC4C(C(C(C(O4)CO)O)O)O)O	CAH7_HUMAN	5	3.331e-16	1	9.047	27.4338	CA7	Carbonic anhydrase 7
C1=CC(=CC=C1C2=C(C(=O)C3=C(C=C(C=C3O2)O)O)OC4C(C(C(C(O4)CO)O)O)O)O	CAH9_HUMAN	5	1.803e-08	0.4627	13.5808	13.4529	CA9	Carbonic anhydrase 9
C1=CC(=CC=C1C2=C(C(=O)C3=C(C=C(C=C3O2)O)O)OC4C(C(C(C(O4)CO)O)O)O)O	CBR1_HUMAN	5	2.273e-09	0.3538	0.3538	15.0677	CBR1	Carbonyl reductase [NADPH] 1
C1=CC(=CC=C1C2=C(C(=O)C3=C(C=C(C=C3O2)O)O)OC4C(C(C(C(O4)CO)O)O)O)O	CBS_HUMAN	5	6.957e-30	0.5342	0.8409	51.8971	CBS	Cystathionine beta-synthase
C1=CC(=CC=C1C2=C(C(=O)C3=C(C=C(C=C3O2)O)O)OC4C(C(C(C(O4)CO)O)O)O)O	CD22_HUMAN	5	1.11e-14	0.299	0.879	24.6048	CD22	B-cell receptor CD22
C1=CC(=CC=C1C2=C(C(=O)C3=C(C=C(C=C3O2)O)O)OC4C(C(C(C(O4)CO)O)O)O)O	CP1B1_HUMAN	5	4.168e-22	0.4426	4.9191	37.934	CYP1B1	Cytochrome P450 1B1
C1=CC(=CC=C1C2=C(C(=O)C3=C(C=C(C=C3O2)O)O)OC4C(C(C(C(O4)CO)O)O)O)O	CP2C8_HUMAN	5	1.182e-09	0.4237	0.4237	15.5776	CYP2C8	Cytochrome P450 2C8
C1=CC(=CC=C1C2=C(C(=O)C3=C(C=C(C=C3O2)O)O)OC4C(C(C(C(O4)CO)O)O)O)O	DAPK1_HUMAN	5	2.785e-11	0.4237	0.8448	18.4997	DAPK1	Death-associated protein kinase 1
C1=CC(=CC=C1C2=C(C(=O)C3=C(C=C(C=C3O2)O)O)OC4C(C(C(C(O4)CO)O)O)O)O	ELAV3_HUMAN	5	1.623e-45	0.4237	1.1688	79.9619	ELAVL3	ELAV-like protein 3
C1=CC(=CC=C1C2=C(C(=O)C3=C(C=C(C=C3O2)O)O)OC4C(C(C(C(O4)CO)O)O)O)O	ELAV1_HUMAN	5	4.196e-08	0.4237	0.4237	12.7943	ELAVL1	ELAV-like protein 1
C1=CC(=CC=C1C2=C(C(=O)C3=C(C=C(C=C3O2)O)O)OC4C(C(C(C(O4)CO)O)O)O)O	ERAP1_HUMAN	5	1.276e-08	0.4839	1.4516	13.7223	ERAP1	Endoplasmic reticulum aminopeptidase 1
C1=CC(=CC=C1C2=C(C(=O)C3=C(C=C(C=C3O2)O)O)OC4C(C(C(C(O4)CO)O)O)O)O	FGF1_HUMAN	5	3.164e-18	0.3382	0.6369	30.9675	FGF1	Fibroblast growth factor 1
C1=CC(=CC=C1C2=C(C(=O)C3=C(C=C(C=C3O2)O)O)OC4C(C(C(C(O4)CO)O)O)O)O	FGF2_HUMAN	5	9.326e-15	0.3382	0.6369	24.7398	FGF2	Fibroblast growth factor 2
C1=CC(=CC=C1C2=C(C(=O)C3=C(C=C(C=C3O2)O)O)OC4C(C(C(C(O4)CO)O)O)O)O	GPR35_HUMAN	5	8.99e-06	0.4237	1.58	8.6096	GPR35	G-protein coupled receptor 35
C1=CC(=CC=C1C2=C(C(=O)C3=C(C=C(C=C3O2)O)O)OC4C(C(C(C(O4)CO)O)O)O)O	GSTO1_HUMAN	5	4.396e-07	0.2879	0.2879	10.9627	GSTO1	Glutathione S-transferase omega-1
C1=CC(=CC=C1C2=C(C(=O)C3=C(C=C(C=C3O2)O)O)OC4C(C(C(C(O4)CO)O)O)O)O	IL2_HUMAN	5	2.072e-39	0.5538	2.2938	68.9995	IL2	Interleukin-2
C1=CC(=CC=C1C2=C(C(=O)C3=C(C=C(C=C3O2)O)O)OC4C(C(C(C(O4)CO)O)O)O)O	IL6_HUMAN	5	5.175e-08	0.3143	0.3143	12.6308	IL6	Interleukin-6
C1=CC(=CC=C1C2=C(C(=O)C3=C(C=C(C=C3O2)O)O)OC4C(C(C(C(O4)CO)O)O)O)O	KCND3_HUMAN	5	9.315e-14	0.3385	0.3385	22.9443	KCND3	Potassium voltage-gated channel subfamily D member 3
C1=CC(=CC=C1C2=C(C(=O)C3=C(C=C(C=C3O2)O)O)OC4C(C(C(C(O4)CO)O)O)O)O	KS6A3_HUMAN	5	6.337e-21	0.8364	11.7961	35.812	RPS6KA3	Ribosomal protein S6 kinase alpha-3
C1=CC(=CC=C1C2=C(C(=O)C3=C(C=C(C=C3O2)O)O)OC4C(C(C(C(O4)CO)O)O)O)O	LEG1_HUMAN	5	9.449e-06	0.3077	0.3077	8.5707	LGALS1	Galectin-1
C1=CC(=CC=C1C2=C(C(=O)C3=C(C=C(C=C3O2)O)O)OC4C(C(C(C(O4)CO)O)O)O)O	LEG3_HUMAN	5	5.442e-06	0.3117	0.6194	9.001	LGALS3	Galectin-3
C1=CC(=CC=C1C2=C(C(=O)C3=C(C=C(C=C3O2)O)O)OC4C(C(C(C(O4)CO)O)O)O)O	LEG9_HUMAN	5	5.045e-07	0.3117	0.3117	10.8554	LGALS9	Galectin-9
C1=CC(=CC=C1C2=C(C(=O)C3=C(C=C(C=C3O2)O)O)OC4C(C(C(C(O4)CO)O)O)O)O	LGUL_HUMAN	5	3.485e-12	0.4237	1.159	20.1204	GLO1	Lactoylglutathione lyase
C1=CC(=CC=C1C2=C(C(=O)C3=C(C=C(C=C3O2)O)O)OC4C(C(C(C(O4)CO)O)O)O)O	MDR1_HUMAN	5	9.14e-07	0.4915	5.3751	10.392	ABCB1	ATP-dependent translocase ABCB1
C1=CC(=CC=C1C2=C(C(=O)C3=C(C=C(C=C3O2)O)O)OC4C(C(C(C(O4)CO)O)O)O)O	MRP1_HUMAN	5	2.498e-08	0.4237	2.2098	13.1988	ABCC1	Multidrug resistance-associated protein 1
C1=CC(=CC=C1C2=C(C(=O)C3=C(C=C(C=C3O2)O)O)OC4C(C(C(C(O4)CO)O)O)O)O	NEK6_HUMAN	5	1.224e-08	0.4237	0.4237	13.7549	NEK6	Serine/threonine-protein kinase Nek6
C1=CC(=CC=C1C2=C(C(=O)C3=C(C=C(C=C3O2)O)O)OC4C(C(C(C(O4)CO)O)O)O)O	NMUR2_HUMAN	5	1.279e-19	0.6418	0.6418	33.4691	NMUR2	Neuromedin-U receptor 2
C1=CC(=CC=C1C2=C(C(=O)C3=C(C=C(C=C3O2)O)O)OC4C(C(C(C(O4)CO)O)O)O)O	NOX4_HUMAN	5	4.348e-18	0.8545	3.0554	30.7197	NOX4	NADPH oxidase 4
C1=CC(=CC=C1C2=C(C(=O)C3=C(C=C(C=C3O2)O)O)OC4C(C(C(C(O4)CO)O)O)O)O	P2Y14_HUMAN	5	1.324e-13	0.2875	1.4095	22.6702	P2RY14	P2Y purinoceptor 14
C1=CC(=CC=C1C2=C(C(=O)C3=C(C=C(C=C3O2)O)O)OC4C(C(C(C(O4)CO)O)O)O)O	PDIA1_HUMAN	5	2.115e-67	1	6.5135	119.252	P4HB	Protein disulfide-isomerase
C1=CC(=CC=C1C2=C(C(=O)C3=C(C=C(C=C3O2)O)O)OC4C(C(C(C(O4)CO)O)O)O)O	PLGF_HUMAN	5	1.11e-16	0.3194	0.3194	28.3341	PGF	Placenta growth factor
C1=CC(=CC=C1C2=C(C(=O)C3=C(C=C(C=C3O2)O)O)OC4C(C(C(C(O4)CO)O)O)O)O	PPAC_HUMAN	5	2.17e-25	0.3871	3.0448	43.8289	ACP1	Low molecular weight phosphotyrosine protein phosphatase
C1=CC(=CC=C1C2=C(C(=O)C3=C(C=C(C=C3O2)O)O)OC4C(C(C(C(O4)CO)O)O)O)O	PPBI_HUMAN	5	2.331e-11	0.8545	1.9078	18.6384	ALPI	Intestinal-type alkaline phosphatase
C1=CC(=CC=C1C2=C(C(=O)C3=C(C=C(C=C3O2)O)O)OC4C(C(C(C(O4)CO)O)O)O)O	PTPRS_HUMAN	5	3.253e-14	0.4211	0.7226	23.7656	PTPRS	Receptor-type tyrosine-protein phosphatase S
C1=CC(=CC=C1C2=C(C(=O)C3=C(C=C(C=C3O2)O)O)OC4C(C(C(C(O4)CO)O)O)O)O	RASH_HUMAN	5	7.959e-13	0.3418	0.9678	21.2717	HRAS	GTPase HRas
C1=CC(=CC=C1C2=C(C(=O)C3=C(C=C(C=C3O2)O)O)OC4C(C(C(C(O4)CO)O)O)O)O	S28A3_HUMAN	5	7.747e-59	0.4697	0.4697	103.877	SLC28A3	Solute carrier family 28 member 3
C1=CC(=CC=C1C2=C(C(=O)C3=C(C=C(C=C3O2)O)O)OC4C(C(C(C(O4)CO)O)O)O)O	SC5A1_HUMAN	5	1.004e-42	0.4848	29.6413	74.9504	SLC5A1	Sodium/glucose cotransporter 1
C1=CC(=CC=C1C2=C(C(=O)C3=C(C=C(C=C3O2)O)O)OC4C(C(C(C(O4)CO)O)O)O)O	SC5A2_HUMAN	5	9.208e-52	0.4848	43.0003	91.1755	SLC5A2	Sodium/glucose cotransporter 2
C1=CC(=CC=C1C2=C(C(=O)C3=C(C=C(C=C3O2)O)O)OC4C(C(C(C(O4)CO)O)O)O)O	SC5A4_HUMAN	5	1.488e-11	0.4848	0.8134	18.9887	SLC5A4	Solute carrier family 5 member 4
C1=CC(=CC=C1C2=C(C(=O)C3=C(C=C(C=C3O2)O)O)OC4C(C(C(C(O4)CO)O)O)O)O	SIAT1_HUMAN	5	4.478e-06	0.2969	0.2969	9.153	ST6GAL1	Beta-galactoside alpha-2,6-sialyltransferase 1
C1=CC(=CC=C1C2=C(C(=O)C3=C(C=C(C=C3O2)O)O)OC4C(C(C(C(O4)CO)O)O)O)O	SYYC_HUMAN	5	6.674e-06	0.2973	0.2973	8.8419	YARS1	Tyrosine--tRNA ligase, cytoplasmic
C1=CC(=CC=C1C2=C(C(=O)C3=C(C=C(C=C3O2)O)O)OC4C(C(C(C(O4)CO)O)O)O)O	TNNC1_HUMAN	5	7.988e-06	0.3733	0.7467	8.7017	TNNC1	Troponin C, slow skeletal and cardiac muscles
C1=CC(=CC=C1C2=C(C(=O)C3=C(C=C(C=C3O2)O)O)OC4C(C(C(C(O4)CO)O)O)O)O	TNNI3_HUMAN	5	7.988e-06	0.3733	0.7467	8.7017	TNNI3	Troponin I, cardiac muscle
C1=CC(=CC=C1C2=C(C(=O)C3=C(C=C(C=C3O2)O)O)OC4C(C(C(C(O4)CO)O)O)O)O	TNNT2_HUMAN	5	7.988e-06	0.3733	0.7467	8.7017	TNNT2	Troponin T, cardiac muscle
C1=CC(=CC=C1C2=C(C(=O)C3=C(C=C(C=C3O2)O)O)OC4C(C(C(C(O4)CO)O)O)O)O	TOP1_HUMAN	5	2.15e-51	0.3371	15.9838	90.5145	TOP1	DNA topoisomerase 1
C1=CC(=CC=C1C2=C(C(=O)C3=C(C=C(C=C3O2)O)O)OC4C(C(C(C(O4)CO)O)O)O)O	TOP2A_HUMAN	5	8.549e-09	0.3966	1.2555	14.0348	TOP2A	DNA topoisomerase 2-alpha
C1=CC(=CC=C1C2=C(C(=O)C3=C(C=C(C=C3O2)O)O)OC4C(C(C(C(O4)CO)O)O)O)O	TYRO_HUMAN	5	2.396e-47	0.4754	4.8187	83.2486	TYR	Tyrosinase
C1=CC(=CC=C1C2=C(C(=O)C3=C(C=C(C=C3O2)O)O)OC4C(C(C(C(O4)CO)O)O)O)O	VEGFA_HUMAN	5	6.661e-16	0.3382	0.9564	26.8135	VEGFA	Vascular endothelial growth factor A
C1=CC(=CC=C1C2=C(C(=O)C3=C(C=C(C=C3O2)O)O)OC4C(C(C(C(O4)CO)O)O)O)O	XDH_HUMAN	5	1.808e-26	0.5441	5.7182	45.7665	XDH	Xanthine dehydrogenase/oxidase
CC(C)C(=C)CCC(C1C(CC2(C1(CCC3=C2CCC4C3(CCC(C4(C)C)O)C)C)C)O)C(=O)O	AK1BA_HUMAN	5	1.269e-06	0.3165	0.9105	10.1361	AKR1B10	Aldo-keto reductase family 1 member B10
CC(C)C(=C)CCC(C1C(CC2(C1(CCC3=C2CCC4C3(CCC(C4(C)C)O)C)C)C)O)C(=O)O	CD81_HUMAN	5	6.694e-38	0.3	0.3	66.2896	CD81	CD81 antigen
CC(C)C(=C)CCC(C1C(CC2(C1(CCC3=C2CCC4C3(CCC(C4(C)C)O)C)C)C)O)C(=O)O	CRYAB_HUMAN	5	8.243e-37	0.4583	0.4583	64.332	CRYAB	Alpha-crystallin B chain
CC(C)C(=C)CCC(C1C(CC2(C1(CCC3=C2CCC4C3(CCC(C4(C)C)O)C)C)C)O)C(=O)O	DHI2_HUMAN	5	1.947e-06	0.3049	0.8963	9.8023	HSD11B2	Corticosteroid 11-beta-dehydrogenase isozyme 2
CC(C)C(=C)CCC(C1C(CC2(C1(CCC3=C2CCC4C3(CCC(C4(C)C)O)C)C)C)O)C(=O)O	DPOLA_HUMAN	5	1.365e-07	0.2973	0.5946	11.8744	POLA1	DNA polymerase alpha catalytic subunit
CC(C)C(=C)CCC(C1C(CC2(C1(CCC3=C2CCC4C3(CCC(C4(C)C)O)C)C)C)O)C(=O)O	PIN1_HUMAN	5	7.068e-09	0.3765	1.6865	14.183	PIN1	Peptidyl-prolyl cis-trans isomerase NIMA-interacting 1
CC(C)C(=C)CCC(C1C(CC2(C1(CCC3=C2CCC4C3(CCC(C4(C)C)O)C)C)C)O)C(=O)O	PTN1_HUMAN	5	7.772e-15	0.3293	15.8268	24.8861	PTPN1	Tyrosine-protein phosphatase non-receptor type 1
CC(C)C(=C)CCC(C1C(CC2(C1(CCC3=C2CCC4C3(CCC(C4(C)C)O)C)C)C)O)C(=O)O	PTN2_HUMAN	5	5.608e-20	0.3293	7.2262	34.112	PTPN2	Tyrosine-protein phosphatase non-receptor type 2
CC(C)C(=C)CCC(C1C(CC2(C1(CCC3=C2CCC4C3(CCC(C4(C)C)O)C)C)C)O)C(=O)O	PTN6_HUMAN	5	6.69e-08	0.3214	0.9061	12.4305	PTPN6	Tyrosine-protein phosphatase non-receptor type 6
CC1CC(OC2C1=C3CC(C4C5(CCC(=O)C(C5CCC4(C3(C2)C)C)(C)C)C)O)C(C(C)(C)O)O	EST2_HUMAN	5	6.854e-10	0.4634	1.8527	16.0023	CES2	Cocaine esterase
CC1=CC2=C(C(=C1O)OC)C(=O)C3=C(C2=O)C=CC=C3O	ACLY_HUMAN	5	3.655e-11	0.375	1.0415	18.2878	ACLY	ATP-citrate synthase
CC1=CC2=C(C(=C1O)OC)C(=O)C3=C(C2=O)C=CC=C3O	ANTR2_HUMAN	5	3.462e-20	0.3214	0.3214	34.488	ANTXR2	Anthrax toxin receptor 2
CC1=CC2=C(C(=C1O)OC)C(=O)C3=C(C2=O)C=CC=C3O	B2LA1_HUMAN	5	1.587e-23	0.3091	2.3614	40.482	BCL2A1	Bcl-2-related protein A1
CC1=CC2=C(C(=C1O)OC)C(=O)C3=C(C2=O)C=CC=C3O	CBR1_HUMAN	5	2.022e-09	0.3559	0.3559	15.1587	CBR1	Carbonyl reductase [NADPH] 1
CC1=CC2=C(C(=C1O)OC)C(=O)C3=C(C2=O)C=CC=C3O	CP1B1_HUMAN	5	3.331e-06	0.3721	1.3061	9.3837	CYP1B1	Cytochrome P450 1B1
CC1=CC2=C(C(=C1O)OC)C(=O)C3=C(C2=O)C=CC=C3O	CREB1_HUMAN	5	5.551e-16	0.3036	0.3036	26.9133	CREB1	Cyclic AMP-responsive element-binding protein 1
CC1=CC2=C(C(=C1O)OC)C(=O)C3=C(C2=O)C=CC=C3O	DNM3B_HUMAN	5	2.475e-06	0.322	0.322	9.6152	DNMT3B	DNA (cytosine-5)-methyltransferase 3B
CC1=CC2=C(C(=C1O)OC)C(=O)C3=C(C2=O)C=CC=C3O	ELAV1_HUMAN	5	1.116e-10	0.2909	0.5716	17.4174	ELAVL1	ELAV-like protein 1
CC1=CC2=C(C(=C1O)OC)C(=O)C3=C(C2=O)C=CC=C3O	FIBB_HUMAN	5	1.105e-10	0.2857	0.2857	17.4253	FGB	Fibrinogen beta chain
CC1=CC2=C(C(=C1O)OC)C(=O)C3=C(C2=O)C=CC=C3O	FTO_HUMAN	5	8.23e-18	0.4444	0.4444	30.2223	FTO	Alpha-ketoglutarate-dependent dioxygenase FTO
CC1=CC2=C(C(=C1O)OC)C(=O)C3=C(C2=O)C=CC=C3O	G6PT1_HUMAN	5	2.593e-43	0.4464	1.5528	76.0057	SLC37A4	Glucose-6-phosphate exchanger SLC37A4
CC1=CC2=C(C(=C1O)OC)C(=O)C3=C(C2=O)C=CC=C3O	GSHR_HUMAN	5	4.311e-09	0.3585	0.7103	14.5686	GSR	Glutathione reductase, mitochondrial
CC1=CC2=C(C(=C1O)OC)C(=O)C3=C(C2=O)C=CC=C3O	I23O1_HUMAN	5	1.911e-06	0.4	3.2246	9.8168	IDO1	Indoleamine 2,3-dioxygenase 1
CC1=CC2=C(C(=C1O)OC)C(=O)C3=C(C2=O)C=CC=C3O	IF4H_HUMAN	5	5.387e-06	0.3793	0.3793	9.0089	EIF4H	Eukaryotic translation initiation factor 4H
CC1=CC2=C(C(=C1O)OC)C(=O)C3=C(C2=O)C=CC=C3O	IL6_HUMAN	5	8.438e-08	0.3051	0.3051	12.2496	IL6	Interleukin-6
CC1=CC2=C(C(=C1O)OC)C(=O)C3=C(C2=O)C=CC=C3O	ITF2_HUMAN	5	5.551e-16	0.44	0.44	27.0048	TCF4	Transcription factor 4
CC1=CC2=C(C(=C1O)OC)C(=O)C3=C(C2=O)C=CC=C3O	KCNB1_HUMAN	5	1.336e-53	0.3621	0.6724	94.4757	KCNB1	Potassium voltage-gated channel subfamily B member 1
CC1=CC2=C(C(=C1O)OC)C(=O)C3=C(C2=O)C=CC=C3O	MCL1_HUMAN	5	8.494e-06	0.3953	5.6939	8.6538	MCL1	Induced myeloid leukemia cell differentiation protein Mcl-1
CC1=CC2=C(C(=C1O)OC)C(=O)C3=C(C2=O)C=CC=C3O	PADI3_HUMAN	5	1.012e-09	0.2817	0.2817	15.6989	PADI3	Protein-arginine deiminase type-3
CC1=CC2=C(C(=C1O)OC)C(=O)C3=C(C2=O)C=CC=C3O	PADI4_HUMAN	5	1.142e-06	0.2817	0.2817	10.2186	PADI4	Protein-arginine deiminase type-4
CC1=CC2=C(C(=C1O)OC)C(=O)C3=C(C2=O)C=CC=C3O	PGAM1_HUMAN	5	2.924e-39	0.3333	0.6384	68.7308	PGAM1	Phosphoglycerate mutase 1
CC1=CC2=C(C(=C1O)OC)C(=O)C3=C(C2=O)C=CC=C3O	PLAP_HUMAN	5	2.849e-06	0.2857	0.2857	9.5055	PLAA	Phospholipase A-2-activating protein
CC1=CC2=C(C(=C1O)OC)C(=O)C3=C(C2=O)C=CC=C3O	PTPRS_HUMAN	5	3.346e-06	0.2931	0.2931	9.3802	PTPRS	Receptor-type tyrosine-protein phosphatase S
CC1=CC2=C(C(=C1O)OC)C(=O)C3=C(C2=O)C=CC=C3O	SIR5_HUMAN	5	3.596e-06	0.3333	0.3333	9.3239	SIRT5	NAD-dependent protein deacylase sirtuin-5, mitochondrial
CC1=CC2=C(C(=C1O)OC)C(=O)C3=C(C2=O)C=CC=C3O	ST17B_HUMAN	5	1.512e-06	0.3036	0.8779	9.9993	STK17B	Serine/threonine-protein kinase 17B
CC1=CC2=C(C(=C1O)OC)C(=O)C3=C(C2=O)C=CC=C3O	SUZ12_HUMAN	5	4.316e-09	0.283	0.283	14.5676	SUZ12	Polycomb protein SUZ12
CC1=CC2=C(C(=C1O)OC)C(=O)C3=C(C2=O)C=CC=C3O	TP4A3_HUMAN	5	6.093e-08	0.3864	0.3864	12.5035	PTP4A3	Protein tyrosine phosphatase type IVA 3
CC1=CC2=C(C(=C1O)OC)C(=O)C3=C(C2=O)C=CC=C3O	TPMT_HUMAN	5	5.743e-12	0.2917	0.2917	19.7309	TPMT	Thiopurine S-methyltransferase
CC(=CCC1=C(C=C(C(=C1OC)C2=COC3=C(C2=O)C=CC(=C3)O)O)OC)C	3MG_HUMAN	5	1.554e-15	0.2951	0.2951	26.1534	MPG	DNA-3-methyladenine glycosylase
CC(=CCC1=C(C=C(C(=C1OC)C2=COC3=C(C2=O)C=CC(=C3)O)O)OC)C	ABCG2_HUMAN	5	1.704e-10	0.4697	5.0188	17.0876	ABCG2	Broad substrate specificity ATP-binding cassette transporter ABCG2
CC(=CCC1=C(C=C(C(=C1OC)C2=COC3=C(C2=O)C=CC(=C3)O)O)OC)C	AK1BA_HUMAN	5	2.793e-06	0.2917	0.8591	9.5211	AKR1B10	Aldo-keto reductase family 1 member B10
CC(=CCC1=C(C=C(C(=C1OC)C2=COC3=C(C2=O)C=CC(=C3)O)O)OC)C	AL1A2_HUMAN	5	2.205e-11	0.3611	0.3611	18.6818	ALDH1A2	Retinal dehydrogenase 2
CC(=CCC1=C(C=C(C(=C1OC)C2=COC3=C(C2=O)C=CC(=C3)O)O)OC)C	AL1B1_HUMAN	5	3.075e-12	0.3611	0.3611	20.2179	ALDH1B1	Aldehyde dehydrogenase X, mitochondrial
CC(=CCC1=C(C=C(C(=C1OC)C2=COC3=C(C2=O)C=CC(=C3)O)O)OC)C	ALDH2_HUMAN	5	1.08e-79	0.4262	14.9866	141.32	ALDH2	Aldehyde dehydrogenase, mitochondrial
CC(=CCC1=C(C=C(C(=C1OC)C2=COC3=C(C2=O)C=CC(=C3)O)O)OC)C	CATL2_HUMAN	5	3.882e-09	0.3731	1.6517	14.6502	CTSV	Cathepsin L2
CC(=CCC1=C(C=C(C(=C1OC)C2=COC3=C(C2=O)C=CC(=C3)O)O)OC)C	CBR1_HUMAN	5	3.532e-10	0.3871	0.3871	16.5192	CBR1	Carbonyl reductase [NADPH] 1
CC(=CCC1=C(C=C(C(=C1OC)C2=COC3=C(C2=O)C=CC(=C3)O)O)OC)C	CP1A1_HUMAN	5	4.403e-07	0.3194	0.6283	10.9615	CYP1A1	Cytochrome P450 1A1
CC(=CCC1=C(C=C(C(=C1OC)C2=COC3=C(C2=O)C=CC(=C3)O)O)OC)C	CP19A_HUMAN	5	3.768e-06	0.3971	6.3206	9.2876	CYP19A1	Aromatase
CC(=CCC1=C(C=C(C(=C1OC)C2=COC3=C(C2=O)C=CC(=C3)O)O)OC)C	CP1B1_HUMAN	5	1.214e-17	0.5179	3.9048	29.9192	CYP1B1	Cytochrome P450 1B1
CC(=CCC1=C(C=C(C(=C1OC)C2=COC3=C(C2=O)C=CC(=C3)O)O)OC)C	DCOR_HUMAN	5	1.707e-32	0.3415	1.3049	56.5834	ODC1	Ornithine decarboxylase
CC(=CCC1=C(C=C(C(=C1OC)C2=COC3=C(C2=O)C=CC(=C3)O)O)OC)C	DHB3_HUMAN	5	1.206e-10	0.3333	2.3997	17.3572	HSD17B3	Testosterone 17-beta-dehydrogenase 3
CC(=CCC1=C(C=C(C(=C1OC)C2=COC3=C(C2=O)C=CC(=C3)O)O)OC)C	ERAP1_HUMAN	5	8.042e-09	0.3231	1.4875	14.0824	ERAP1	Endoplasmic reticulum aminopeptidase 1
CC(=CCC1=C(C=C(C(=C1OC)C2=COC3=C(C2=O)C=CC(=C3)O)O)OC)C	ESR1_HUMAN	5	7.926e-08	0.4478	9.7812	12.2984	ESR1	Estrogen receptor
CC(=CCC1=C(C=C(C(=C1OC)C2=COC3=C(C2=O)C=CC(=C3)O)O)OC)C	ESR2_HUMAN	5	7.925e-08	0.4068	8.2558	12.2985	ESR2	Estrogen receptor beta
CC(=CCC1=C(C=C(C(=C1OC)C2=COC3=C(C2=O)C=CC(=C3)O)O)OC)C	HIF1A_HUMAN	5	1.949e-07	0.3714	1.6058	11.5968	HIF1A	Hypoxia-inducible factor 1-alpha
CC(=CCC1=C(C=C(C(=C1OC)C2=COC3=C(C2=O)C=CC(=C3)O)O)OC)C	IL2_HUMAN	5	3.276e-28	0.5179	1.6299	48.8938	IL2	Interleukin-2
CC(=CCC1=C(C=C(C(=C1OC)C2=COC3=C(C2=O)C=CC(=C3)O)O)OC)C	IMDH1_HUMAN	5	8.331e-08	0.3023	1.4638	12.2595	IMPDH1	Inosine-5'-monophosphate dehydrogenase 1
CC(=CCC1=C(C=C(C(=C1OC)C2=COC3=C(C2=O)C=CC(=C3)O)O)OC)C	IMDH2_HUMAN	5	6.593e-10	0.381	4.8117	16.0326	IMPDH2	Inosine-5'-monophosphate dehydrogenase 2
CC(=CCC1=C(C=C(C(=C1OC)C2=COC3=C(C2=O)C=CC(=C3)O)O)OC)C	ITF2_HUMAN	5	8.211e-22	0.3049	0.6075	37.4053	TCF4	Transcription factor 4
CC(=CCC1=C(C=C(C(=C1OC)C2=COC3=C(C2=O)C=CC(=C3)O)O)OC)C	KLK7_HUMAN	5	2.413e-09	0.4262	1.0056	15.021	KLK7	Kallikrein-7
CC(=CCC1=C(C=C(C(=C1OC)C2=COC3=C(C2=O)C=CC(=C3)O)O)OC)C	LOX12_HUMAN	5	4.849e-12	0.4355	2.0763	19.8628	ALOX12	Arachidonate 12-lipoxygenase, 12S-type
CC(=CCC1=C(C=C(C(=C1OC)C2=COC3=C(C2=O)C=CC(=C3)O)O)OC)C	LOX5_HUMAN	5	1.243e-10	0.4091	10.8226	17.3337	ALOX5	Arachidonate 5-lipoxygenase
CC(=CCC1=C(C=C(C(=C1OC)C2=COC3=C(C2=O)C=CC(=C3)O)O)OC)C	MRP2_HUMAN	5	1.381e-07	0.2805	0.2805	11.8653	ABCC2	Canalicular multispecific organic anion transporter 1
CC(=CCC1=C(C=C(C(=C1OC)C2=COC3=C(C2=O)C=CC(=C3)O)O)OC)C	NFKB1_HUMAN	5	3.351e-06	0.4839	0.4839	9.3789	NFKB1	Nuclear factor NF-kappa-B p105 subunit
CC(=CCC1=C(C=C(C(=C1OC)C2=COC3=C(C2=O)C=CC(=C3)O)O)OC)C	NQO1_HUMAN	5	5.199e-10	0.3571	1.5472	16.2179	NQO1	NAD(P)H dehydrogenase [quinone] 1
CC(=CCC1=C(C=C(C(=C1OC)C2=COC3=C(C2=O)C=CC(=C3)O)O)OC)C	PDE4D_HUMAN	5	2.328e-08	0.5088	4.5176	13.2538	PDE4D	cAMP-specific 3',5'-cyclic phosphodiesterase 4D
CC(=CCC1=C(C=C(C(=C1OC)C2=COC3=C(C2=O)C=CC(=C3)O)O)OC)C	PLAP_HUMAN	5	2.611e-06	0.2877	0.2877	9.5735	PLAA	Phospholipase A-2-activating protein
CC(=CCC1=C(C=C(C(=C1OC)C2=COC3=C(C2=O)C=CC(=C3)O)O)OC)C	PPAC_HUMAN	5	5.107e-15	0.3125	1.7706	25.203	ACP1	Low molecular weight phosphotyrosine protein phosphatase
CC(=CCC1=C(C=C(C(=C1OC)C2=COC3=C(C2=O)C=CC(=C3)O)O)OC)C	PTN12_HUMAN	5	2.763e-06	0.2842	0.5668	9.5295	PTPN12	Tyrosine-protein phosphatase non-receptor type 12
CC(=CCC1=C(C=C(C(=C1OC)C2=COC3=C(C2=O)C=CC(=C3)O)O)OC)C	PTN1_HUMAN	5	4.362e-10	0.4531	10.8256	16.3547	PTPN1	Tyrosine-protein phosphatase non-receptor type 1
CC(=CCC1=C(C=C(C(=C1OC)C2=COC3=C(C2=O)C=CC(=C3)O)O)OC)C	PTPRS_HUMAN	5	3.073e-06	0.2951	0.2951	9.4464	PTPRS	Receptor-type tyrosine-protein phosphatase S
CC(=CCC1=C(C=C(C(=C1OC)C2=COC3=C(C2=O)C=CC(=C3)O)O)OC)C	T2R31_HUMAN	5	4.441e-15	0.2857	0.2857	25.3149	TAS2R31	Taste receptor type 2 member 31
CC(=CCC1=C(C=C(C(=C1OC)C2=COC3=C(C2=O)C=CC(=C3)O)O)OC)C	TBB1_HUMAN	5	2.047e-11	0.2895	1.1422	18.7399	TUBB1	Tubulin beta-1 chain
CC(=CCC1=C(C=C(C(=C1OC)C2=COC3=C(C2=O)C=CC(=C3)O)O)OC)C	TF65_HUMAN	5	7.1e-07	0.4127	1.0841	10.5889	RELA	Transcription factor p65
CC(=CCC1=C(C=C(C(=C1OC)C2=COC3=C(C2=O)C=CC(=C3)O)O)OC)C	TTHY_HUMAN	5	3.171e-07	0.4098	0.9931	11.2173	TTR	Transthyretin
CC(=CCC1=C(C=C(C(=C1OC)C2=COC3=C(C2=O)C=CC(=C3)O)O)OC)C	TYRO_HUMAN	5	6.34e-13	0.4478	1.2678	21.4491	TYR	Tyrosinase
