# Supplementary material for: Investigation of the potential mechanism of the Shugan Xiaozhi decoction for the treatment of nonalcoholic fatty liver disease based on network pharmacology, molecular docking and molecular dynamics simulation
Source: PeerJ journal article supplement (doi:10.7717/peerj.14171), 2022-11-10
Supplement: Supplementary_Table_S4.docx [file Supplementary_Table_S4.docx]

**Supplementary Table S4. Detailed information of docking parameters**

| Gene | Uniprot ID | PDB code | Docking site | Docking coordinate  (X, Y, Z) Å |
| --- | --- | --- | --- | --- |
| IL6 | P05231 | 1ALU | GLU42, ASN61[1] | 5.392, -30.536, 3.504 |
| VEGFA | P15692 | 1BJI | Active cavity | 36.059, -28.890, 0.000 |
| ESR1 | P03372 | 1ERE | ARG394, GLY521[2] | 6.151, 53.525, 131.421 |
| HIF1A | Q16665 | 3KCX | HIS279, ILE281 | -21.331,25.461,9.364 |
| MMP9 | P14780 | 4HMA | TYR179, LEU187, ALA191, PHE192, HIS230, LEU234[3] | 7.967, 13.951, -2.996 |
| APP | P05067 | 5BUO | Active cavity | 13.864, 23.025, 13.986 |
| FGF1 | P05230 | 1AFC | ASN18, LYS112, LYS113, LYS118, ARG122, GLN127 [4] | 20.736, 18.465, 10.283 |
| IL2 | P60568 | 3QB1 | ARG38, VAL69, LYS76[5] | 16.202, 20.076, -9.631 |
| LGALS3 | P17931 | 1KJL | ASN174, GLU184, ARG160, ALA146 [6] | -0.914, -3.938, -2.862 |
| SLC5A1 | P13866 | 2XQ2# | LEU74, SER77, TYR290, ASP294, GLN295[7] | -1.864, -31.824,  -52.181 |
| F3 | P13726 | 2HFT | Active cavity | 35.135, 42.671, 41.832 |
| ALDH1B1 | P30837 | 5I13# | Active cavity | 92.116, 43.166, 41.290 |
| CES2 | O00748 | 5A7G# | SER228, GLY347, GLU103[8] | 91.169, 88.498, 24.784 |
| P4HB | P07237 | 4EKZ | TRP396, GLY398 [9] | -11.447, -47.531, 3.629 |
| HSPA5 | |  | P11021 | | --- | --- | | 3LDL | ARG367, GLY364, TYR39, ILE61 [10] | 19.150, -7.243, 1.555 |
| RELA | Q04206 | 1NFI | Active cavity | -5.808, 95.005, 90.899 |

#The structure was constructed by homology modeling

**References**

1. Prathap L, Jayaraman S, Roy A, et al. Molecular docking analysis of stachydrine and sakuranetin with IL-6 and TNF-α in the context of inflammation. Bioinformation. (2021); 17: 363-368.

2. Lu Q, Cai Z, Fu J, et al. Molecular docking and molecular dynamics studies on the interactions of hydroxylated polybrominated diphenyl ethers to estrogen receptor alpha. Ecotoxicol Environ Saf. (2014); 101: 83-89.

3. Mukund V, Saddala MS, Farran B, et al. Molecular docking studies of angiogenesis target protein HIF-1α and genistein in breast cancer. Gene. (2019); 701: 169-172.

4. Lv X, Wang H, Wu R, et al. The Active Compounds of Yixin Ningshen Tablet and Their Potential Action Mechanism in Treating Coronary Heart Disease- A Network Pharmacology and Proteomics Approach. Evid Based Complement Alternat Med. (2020); 2020: 4912395.

5. Wang W, Zhang Y, Luo J, et al. Virtual Screening Technique Used to Estimate the Mechanism of Adhatoda vasica Nees for the Treatment of Rheumatoid Arthritis Based on Network Pharmacology and Molecular Docking. Evid Based Complement Alternat Med. (2020); 2020: 5872980.

6. Jayakody RS, Wijewardhane P, Herath C, et al. Bergenin: a computationally proven promising scaffold for novel galectin-3 inhibitors. J Mol Model. (2018); 24: 302.

7. Wang L, Liu M, Yin F, et al. Trilobatin, a Novel SGLT1/2 Inhibitor, Selectively Induces the Proliferation of Human Hepatoblastoma Cells. Molecules. (2019); 24.

8. Song YQ, He RJ, Pu D, et al. Discovery and Characterization of the Biflavones From Ginkgo biloba as Highly Specific and Potent Inhibitors Against Human Carboxylesterase 2. Front Pharmacol. (2021); 12: 655659.

9. Kung PH, Hsieh PW, Lin YT, et al. HPW-RX40 prevents human platelet activation by attenuating cell surface protein disulfide isomerases. Redox Biol. (2017); 13: 266-277.

10. Bhattacharjee R, Devi A and Mishra S. Molecular docking and molecular dynamics studies reveal structural basis of inhibition and selectivity of inhibitors EGCG and OSU-03012 toward glucose regulated protein-78 (GRP78) overexpressed in glioblastoma. J Mol Model. (2015); 21: 272.
